# Supplementary material for: Photoaffinity enabled transcriptome-wide identification of splice modulating small molecule–RNA binding events in native cells
Source: Royal Society of Chemistry journal article supplement (doi:10.1039/d4cb00266k), 2025-01-01
Supplement: d4cb00266k4.xlsx [file d4cb00266k4.xlsx]

## Sheet: NV1-PAL vs. B1-PAL DSGs
coorsID	annotated	isIntron	altsplice_log2fc	altsplice_pvalue	altsplice_padj	altsplice_delta_psi	gene_id	gene_name		DSGs = differentially spliced genes
2:43947731-43947775:-	Y	N	-7.45061	2.77138e-94	6.43054e-89	-0.413442	ENSG00000138095	LRPPRC
1:154262203-154263102:+	Y	Y	2.94668	1.04512e-71	1.21252e-66	0.122739	ENSG00000143569	UBAP2L
9:132288550-132288651:-	Y	N	-17.2464	8.39529e-60	6.49331e-55	-0.576503	ENSG00000107290	SETX
8:18006398-18009546:+	Y	Y	3.00791	3.52246e-45	2.04333e-40	0.147177	ENSG00000078674	PCM1
2:229773561-229774096:-	Y	N	2.9441	9.75863e-45	4.52867e-40	0.129093	ENSG00000153827	TRIP12
20:35716806-35721739:-	Y	Y	2.1709	1.60558e-43	6.20917e-39	0.0284388	ENSG00000131051	RBM39
7:82067257-82084768:-	Y	Y	2.65567	7.81164e-41	2.58938e-36	0.083069	ENSG00000153956	CACNA2D1
10:77812378-77812773:-	N	N	4.61306	5.72393e-38	1.66018e-33	0.319241	ENSG00000151208	DLG5
5:179615596-179616125:-	Y	N	3.12724	1.65784e-37	4.27417e-33	0.205258	ENSG00000169045	HNRNPH1
6:75713513-75713581:+	Y	N	-16.41	3.23268e-37	7.50093e-33	-0.362296	ENSG00000112701	SENP6
18:55234684-55254496:-	Y	Y	-1.13149	1.75405e-36	3.7e-32	-0.00939309	ENSG00000196628	TCF4
1:154262173-154262202:+	N	N	3.27762	2.69456e-35	5.21026e-31	0.258478	ENSG00000143569	UBAP2L
5:168518063-168519080:+	Y	Y	2.35764	1.19765e-32	2.13766e-28	0.0906264	ENSG00000113643	RARS1
2:229771633-229773560:-	Y	Y	2.52473	1.54615e-32	2.56256e-28	0.0709149	ENSG00000153827	TRIP12
11:130123780-130126699:+	Y	Y	1.73107	1.27531e-30	1.97277e-26	0.0159496	ENSG00000084234	APLP2
11:77616696-77618532:-	Y	Y	1.72611	3.91664e-29	5.67996e-25	0.110409	ENSG00000074201	CLNS1A
1:26697541-26727707:+	Y	Y	-1.68593	7.4345e-29	1.01474e-24	-0.0223257	ENSG00000117713	ARID1A
1:81811924-81836884:+	Y	Y	-1.50098	2.7888e-28	3.59498e-24	-0.0100706	ENSG00000117114	ADGRL2
1:154263506-154266451:+	Y	Y	2.1847	6.33055e-27	7.73107e-23	0.0811074	ENSG00000143569	UBAP2L
13:71573574-71630555:-	Y	Y	-1.47886	1.77444e-26	2.05865e-22	-0.00605112	ENSG00000276644	DACH1
15:36974777-37028950:-	Y	Y	-1.24893	2.95643e-26	3.26663e-22	-0.0102709	ENSG00000134138	MEIS2
18:63338884-63340935:-	Y	Y	2.51771	4.59457e-26	4.84589e-22	0.078719	ENSG00000119537	KDSR
1:244417753-244418759:-	Y	Y	2.99875	9.84988e-26	9.93699e-22	0.044855	ENSG00000035687	ADSS2
3:169988360-169992593:+	Y	Y	3.0305	1.11902e-25	1.08188e-21	0.0906747	ENSG00000008952	SEC62
6:87545700-87547633:-	Y	Y	2.41707	1.17924e-24	1.09449e-20	0.178924	ENSG00000146282	RARS2
1:32014378-32030297:+	Y	Y	-1.45806	2.48866e-24	2.22097e-20	-0.00682756	ENSG00000121774	KHDRBS1
2:26941357-26941949:+	N	N	2.01202	3.52566e-24	3.0299e-20	0.0681795	ENSG00000157851	DPYSL5
2:64112673-64143317:-	Y	Y	-1.89947	4.37672e-24	3.62696e-20	-0.0101568	ENSG00000197329	PELI1
7:81970675-81970737:-	Y	N	-15.3582	1.12971e-23	9.039e-20	-0.0908965	ENSG00000153956	CACNA2D1
1:53947862-53947981:+	Y	N	3.30081	1.2003e-23	9.28371e-20	0.49094	ENSG00000116212	LRRC42
1:81907231-81936727:+	Y	Y	-1.47845	1.92793e-23	1.39796e-19	-0.00393904	ENSG00000117114	ADGRL2
2:189761526-189761646:-	Y	N	-6.8379	1.92544e-23	1.39796e-19	-0.750829	ENSG00000128694	OSGEPL1
8:9580384-9615289:+	Y	Y	-1.74463	2.42795e-23	1.70717e-19	-0.0068533	ENSG00000173273	TNKS
14:77287013-77287209:-	Y	N	3.50717	3.21062e-23	2.1911e-19	0.273344	ENSG00000009830	POMT2
3:51430213-51433105:-	Y	Y	3.84205	4.26729e-23	2.82902e-19	0.146872	ENSG00000145041	DCAF1
7:135951631-135977028:-	Y	Y	-1.15675	5.98569e-23	3.85801e-19	-0.00170071	ENSG00000105887	MTPN
7:98186999-98190727:+	Y	Y	3.10661	6.77042e-23	4.24586e-19	0.171097	ENSG00000164715	LMTK2
6:57320561-57324200:+	Y	Y	3.64728	2.62779e-22	1.56343e-18	0.0972732	ENSG00000146143	PRIM2
10:110894412-110894522:+	Y	N	-6.15364	2.61728e-22	1.56343e-18	-0.289047	ENSG00000150593	PDCD4
14:77287825-77288761:-	Y	Y	3.13162	2.72557e-22	1.58106e-18	0.0924205	ENSG00000009830	POMT2
6:100509534-100509931:-	Y	Y	3.53727	3.30099e-22	1.86815e-18	0.321666	ENSG00000112249	ASCC3
9:106939108-106972004:+	Y	Y	-1.64021	3.55754e-22	1.9654e-18	-0.013698	ENSG00000148143	ZNF462
15:82540143-82540419:-	Y	N	1.59751	7.2515e-22	3.91301e-18	0.0956238	ENSG00000182774	RPS17
2:189761420-189761525:-	Y	N	-15.7207	2.9253e-21	1.54265e-17	-0.672326	ENSG00000128694	OSGEPL1
17:76735159-76735617:-	Y	N	-1.28051	3.39971e-21	1.753e-17	-0.0714824	ENSG00000161547	SRSF2
8:17993620-18006053:+	Y	Y	1.90897	3.57224e-21	1.80192e-17	0.141352	ENSG00000078674	PCM1
8:22608078-22612702:+	Y	Y	-1.03778	5.37258e-21	2.65239e-17	-0.00842459	ENSG00000158941	CCAR2
17:48076179-48076864:-	Y	Y	1.91277	5.83162e-21	2.81903e-17	0.0295734	ENSG00000108468	CBX1
6:38116740-38142258:+	Y	Y	-1.52466	6.6922e-21	3.16901e-17	-0.011982	ENSG00000156639	ZFAND3
3:69024055-69024180:-	Y	N	-16.4393	1.40189e-20	6.50572e-17	-0.728416	ENSG00000144747	TMF1
3:185934506-185936237:-	Y	N	-1.41543	1.6061e-20	7.30725e-17	-0.029435	ENSG00000136527	TRA2B
2:121401868-121401870:-	Y	N	-5.63237	2.70361e-20	1.2064e-16	-0.598317	ENSG00000074054	CLASP1
5:51391829-51393493:+	Y	Y	-1.15686	4.42675e-20	1.93803e-16	-0.0154221	ENSG00000016082	ISL1
18:55269964-55275618:-	Y	Y	-1.22651	5.09155e-20	2.1878e-16	-0.00491587	ENSG00000196628	TCF4
15:36950401-36974577:-	Y	Y	-1.44399	5.21331e-20	2.19939e-16	-0.00637232	ENSG00000134138	MEIS2
13:25319326-25319350:+	Y	N	-4.95985	6.09486e-20	2.52538e-16	-0.450667	ENSG00000139496	NUP58
13:71489149-71557023:-	Y	Y	-1.78989	6.83325e-20	2.73503e-16	-0.00805752	ENSG00000276644	DACH1
14:52783423-52783485:-	Y	N	-15.33	6.83657e-20	2.73503e-16	-0.111072	ENSG00000100522	GNPNAT1
2:152681337-152690961:-	Y	Y	-1.4415	9.33506e-20	3.67127e-16	-0.00379773	ENSG00000196504	PRPF40A
12:22626201-22640431:+	Y	Y	-1.86168	9.77332e-20	3.77957e-16	-0.00933583	ENSG00000139163	ETNK1
13:71681911-71865921:-	Y	Y	-2.30575	1.31537e-19	5.00347e-16	-0.0177754	ENSG00000276644	DACH1
1:244854504-244854748:-	Y	N	-1.62305	1.53921e-19	5.76047e-16	-0.0249439	ENSG00000153187	HNRNPU
7:8024815-8055432:+	Y	Y	-1.51034	1.82847e-19	6.73442e-16	-0.010366	ENSG00000106415	GLCCI1
11:95201356-95224451:-	Y	Y	-1.44283	2.11366e-19	7.66313e-16	-0.011198	ENSG00000149212	SESN3
7:8004248-8022482:+	Y	Y	-1.44955	2.34528e-19	8.37207e-16	-0.0089651	ENSG00000106415	GLCCI1
6:87170365-87210450:+	Y	Y	-2.02856	2.454e-19	8.62745e-16	-0.0307299	ENSG00000188994	ZNF292
12:76074240-76083832:-	Y	Y	-1.2424	2.83703e-19	9.79603e-16	-0.00882204	ENSG00000187109	NAP1L1
17:58756462-58955648:+	Y	Y	-1.91216	2.87083e-19	9.79603e-16	-0.0339901	ENSG00000175175	PPM1E
6:99410993-99411735:-	Y	Y	2.09787	3.18275e-19	1.0703e-15	0.302447	ENSG00000132424	PNISR
15:42513210-42513335:+	Y	N	3.71687	3.99448e-19	1.30543e-15	0.5924	ENSG00000092531	SNAP23
19:49098705-49101389:+	Y	Y	1.92441	3.98353e-19	1.30543e-15	0.0675291	ENSG00000104852	SNRNP70
5:163517675-163518192:+	Y	N	2.24264	4.1533e-19	1.33848e-15	0.0752745	ENSG00000038274	MAT2B
14:52881829-52893287:-	Y	Y	-1.41122	4.30503e-19	1.36837e-15	-0.00618174	ENSG00000073712	FERMT2
1:182854179-182855576:+	Y	Y	-1.20825	4.66513e-19	1.4628e-15	-0.0124429	ENSG00000135829	DHX9
4:118318557-118331715:-	Y	Y	-1.46923	6.66277e-19	2.06132e-15	-0.00734345	ENSG00000164099	PRSS12
17:21012936-21015650:-	Y	Y	-0.948511	7.91133e-19	2.41539e-15	-0.00622308	ENSG00000124422	USP22
7:92774832-92833090:-	Y	Y	-1.42535	1.47177e-18	4.43507e-15	-0.00591934	ENSG00000105810	CDK6
2:46699450-46758518:+	Y	Y	-2.07754	1.80417e-18	5.36704e-15	-0.028704	ENSG00000171150	SOCS5
6:154742019-154773988:+	Y	Y	-1.65911	1.86007e-18	5.46328e-15	-0.01747	ENSG00000213079	SCAF8
4:39862219-39862333:-	Y	N	-14.9741	2.13953e-18	6.20555e-15	-0.103086	ENSG00000121892	PDS5A
7:127721401-127807483:+	Y	Y	-1.36336	2.40362e-18	6.88546e-15	-0.00284992	ENSG00000197157	SND1
1:37700522-37701753:+	Y	Y	2.33786	2.5389e-18	7.18429e-15	0.0801841	ENSG00000134690	CDCA8
5:36877179-36953617:+	Y	Y	-1.54939	2.93626e-18	8.20858e-15	-0.00927135	ENSG00000164190	NIPBL
2:66562120-66567452:+	Y	Y	-1.47145	2.98465e-18	8.24451e-15	-0.0133258	ENSG00000143995	MEIS1
15:98649676-98707561:+	Y	Y	-1.33948	3.11902e-18	8.51434e-15	-0.00661808	ENSG00000140443	IGF1R
3:185931619-185931852:-	Y	N	-2.17627	6.15882e-18	1.66169e-14	-0.0730608	ENSG00000136527	TRA2B
17:16344743-16348037:-	Y	Y	-1.19048	6.73627e-18	1.7966e-14	-0.008304	ENSG00000166582	CENPV
1:239408250-239492708:+	Y	Y	-1.84246	6.81543e-18	1.79706e-14	-0.0229429	ENSG00000133019	CHRM3
11:115209658-115214489:-	Y	Y	-1.84208	7.99188e-18	2.08358e-14	-0.00726625	ENSG00000182985	CADM1
3:185929074-185931514:-	Y	Y	-1.37513	8.53036e-18	2.19926e-14	-0.0279721	ENSG00000136527	TRA2B
10:5709530-5709625:+	Y	N	3.00016	1.01074e-17	2.5772e-14	0.416945	ENSG00000108021	TASOR2
17:76348582-76353060:-	Y	Y	2.132	1.30662e-17	3.29544e-14	0.0260695	ENSG00000161542	PRPSAP1
9:83975771-83976507:-	Y	Y	-1.05829	1.46524e-17	3.62264e-14	-0.008112	ENSG00000165119	HNRNPK
11:120337276-120385293:+	Y	Y	-1.5978	1.46758e-17	3.62264e-14	-0.0111139	ENSG00000196914	ARHGEF12
11:120385487-120405932:+	Y	Y	-2.07946	1.52599e-17	3.72717e-14	-0.00865004	ENSG00000196914	ARHGEF12
21:26112147-26140152:-	Y	Y	-1.52927	1.77722e-17	4.29558e-14	-0.00213988	ENSG00000142192	APP
1:70222799-70228421:+	Y	Y	-1.25357	1.91962e-17	4.59193e-14	-0.0193518	ENSG00000116754	SRSF11
6:99411791-99412318:-	Y	N	2.20463	1.99175e-17	4.71585e-14	0.353552	ENSG00000132424	PNISR
1:225595326-225652317:-	Y	Y	-1.52227	2.05521e-17	4.81695e-14	-0.00588913	ENSG00000154380	ENAH
8:116697238-116726015:-	Y	Y	-0.921963	2.79765e-17	6.42723e-14	-0.00315739	ENSG00000147677	EIF3H
18:63341081-63344341:-	Y	Y	2.43093	2.77745e-17	6.42723e-14	0.0491434	ENSG00000119537	KDSR
8:17248418-17265770:+	Y	Y	-1.67064	3.33193e-17	7.57961e-14	-0.0154234	ENSG00000155975	VPS37A
8:94932070-94932107:-	Y	N	-4.7305	3.77169e-17	8.4967e-14	-0.638962	ENSG00000164938	TP53INP1
8:65719496-65721797:-	Y	Y	1.83689	3.89605e-17	8.69247e-14	0.142521	ENSG00000205268	PDE7A
10:31809230-31809307:-	Y	N	-5.4222	4.15168e-17	9.17459e-14	-0.4875	ENSG00000165322	ARHGAP12
18:55279675-55284286:-	Y	Y	-1.82815	4.35169e-17	9.52585e-14	-0.00464746	ENSG00000196628	TCF4
3:18378328-18386398:-	Y	Y	-1.4979	4.50808e-17	9.70386e-14	-0.0108776	ENSG00000182568	SATB1
8:119744881-119745036:-	Y	N	2.84931	4.51665e-17	9.70386e-14	0.440322	ENSG00000064313	TAF2
1:239492808-239545640:+	Y	Y	-1.66289	5.00263e-17	1.05701e-13	-0.0131532	ENSG00000133019	CHRM3
1:176116682-176133846:-	Y	Y	-1.78212	5.05652e-17	1.05701e-13	-0.00937181	ENSG00000143207	COP1
5:111734743-111734983:-	Y	N	-1.63434	5.01915e-17	1.05701e-13	-0.034487	ENSG00000134986	NREP
1:243552944-243563719:-	Y	Y	-1.391	5.34524e-17	1.10739e-13	-0.0038968	ENSG00000117020	AKT3
2:66464221-66496025:+	Y	Y	-1.33325	5.56424e-17	1.14256e-13	-0.0190499	ENSG00000143995	MEIS1
X:119787353-119789907:-	Y	Y	1.17955	6.02957e-17	1.22725e-13	0.00311234	ENSG00000198918	RPL39
2:9620702-9628702:-	Y	Y	-1.03087	6.18236e-17	1.24741e-13	-0.00117537	ENSG00000134308	YWHAQ
1:163188193-163202791:-	Y	Y	-1.05113	7.20753e-17	1.43339e-13	-0.0023927	ENSG00000143248	RGS5
20:2873761-2923206:+	Y	Y	-1.71848	7.22768e-17	1.43339e-13	-0.0113109	ENSG00000132670	PTPRA
10:78035838-78036529:+	Y	N	1.96195	7.55429e-17	1.48547e-13	0.00678636	ENSG00000138326	RPS24
17:63666651-63666939:+	N	N	3.49166	8.27902e-17	1.6143e-13	0.510681	ENSG00000198909	MAP3K3
1:243156822-243163157:-	Y	Y	-1.35016	8.36012e-17	1.61653e-13	-0.0170828	ENSG00000143702	CEP170
12:20370245-20556659:+	Y	Y	-1.42325	9.78363e-17	1.87614e-13	-0.0148917	ENSG00000172572	PDE3A
2:135872844-135876258:-	Y	Y	1.7131	1.14828e-16	2.16618e-13	0.0347208	ENSG00000076003	MCM6
13:48477355-48477404:+	Y	N	-14.5097	1.14425e-16	2.16618e-13	-0.0659245	ENSG00000139687	RB1
10:28538067-28547940:+	Y	Y	-1.23328	1.38702e-16	2.59544e-13	-0.00815474	ENSG00000095787	WAC
19:5233009-5238918:-	Y	Y	-1.02007	1.54966e-16	2.87659e-13	-0.0378095	ENSG00000105426	PTPRS
3:9421593-9422722:+	Y	Y	-3.14961	1.67045e-16	3.0762e-13	-0.0261851	ENSG00000168137	SETD5
7:8078743-8084638:+	Y	Y	-1.63565	1.70859e-16	3.12166e-13	-0.0130282	ENSG00000106415	GLCCI1
8:18006263-18006397:+	Y	N	-4.01177	1.88997e-16	3.42608e-13	-0.174379	ENSG00000078674	PCM1
12:28226200-28255561:+	Y	Y	-1.89108	2.06071e-16	3.70663e-13	-0.0110639	ENSG00000123106	CCDC91
17:29391025-29451454:+	Y	Y	-1.77136	2.14736e-16	3.83277e-13	-0.0129166	ENSG00000160551	TAOK1
8:58960009-59118885:-	Y	Y	-1.48123	2.24841e-16	3.98249e-13	-0.0153945	ENSG00000198846	TOX
2:70224630-70225066:-	Y	N	-2.16301	2.35301e-16	4.1362e-13	-0.119905	ENSG00000116001	TIA1
2:189761647-189761660:-	Y	N	-16.4499	2.45349e-16	4.28041e-13	-0.704044	ENSG00000128694	OSGEPL1
5:32143881-32173745:-	Y	Y	-1.11986	2.74007e-16	4.7447e-13	-0.00662828	ENSG00000113384	GOLPH3
2:54987699-55010086:-	Y	Y	-1.32763	2.85404e-16	4.90543e-13	-0.00190693	ENSG00000115310	RTN4
4:174285575-174297550:+	Y	Y	-1.0923	2.94639e-16	5.02693e-13	-0.0267362	ENSG00000164118	CEP44
4:95335633-95548733:-	Y	Y	-1.68568	3.37458e-16	5.71546e-13	-0.0237483	ENSG00000182168	UNC5C
15:65665199-65665225:-	Y	N	4.84565	3.74913e-16	6.30381e-13	0.713203	ENSG00000174485	DENND4A
13:71559956-71572839:-	Y	Y	-1.34195	3.77647e-16	6.30411e-13	-0.00621795	ENSG00000276644	DACH1
3:149060859-149063430:-	Y	Y	2.32304	5.54179e-16	9.18488e-13	0.0877605	ENSG00000071794	HLTF
1:1560848-1564772:-	Y	N	1.24639	5.80267e-16	9.54906e-13	0.0965185	ENSG00000160075	SSU72
21:26140461-26169217:-	Y	Y	-1.4815	6.77737e-16	1.10745e-12	-0.00360454	ENSG00000142192	APP
1:32376742-32377969:-	Y	Y	2.03603	6.9512e-16	1.12791e-12	0.100584	ENSG00000160058	BSDC1
9:112487119-112574056:+	Y	Y	-1.60981	7.12797e-16	1.14856e-12	-0.0187529	ENSG00000165185	KIAA1958
3:33632375-33644381:-	Y	Y	-1.73357	7.17885e-16	1.14878e-12	-0.0137812	ENSG00000163539	CLASP2
8:71244693-71269739:-	Y	Y	-1.1399	7.31616e-16	1.16274e-12	-0.0104364	ENSG00000104313	EYA1
22:35744250-35745922:-	Y	Y	-1.57126	1.03024e-15	1.62619e-12	-0.0190331	ENSG00000100320	RBFOX2
1:53809747-53818969:-	Y	Y	1.64268	1.1975e-15	1.87744e-12	0.0213479	ENSG00000058804	NDC1
19:39837051-39837710:-	Y	Y	1.80203	1.29494e-15	2.01658e-12	0.0118915	ENSG00000105202	FBL
15:83169232-83189360:-	Y	Y	-1.68913	1.32755e-15	2.05359e-12	-0.00601615	ENSG00000166503	HDGFL3
7:129225440-129351502:+	Y	Y	-2.5695	1.36484e-15	2.09728e-12	-0.058173	ENSG00000158467	AHCYL2
1:225567415-225580166:-	Y	Y	-1.60336	1.70177e-15	2.58084e-12	-0.00313119	ENSG00000154380	ENAH
12:56673066-56686868:-	Y	Y	-1.14607	1.69222e-15	2.58084e-12	-0.00175053	ENSG00000110958	PTGES3
4:39458442-39458598:-	Y	N	1.56781	1.73071e-15	2.60769e-12	0.21719	ENSG00000163682	RPL9
2:70225394-70227734:-	Y	Y	-1.51089	2.02016e-15	3.00478e-12	-0.0884806	ENSG00000116001	TIA1
3:149966587-149968117:-	Y	Y	-1.38419	2.01077e-15	3.00478e-12	-0.0159876	ENSG00000070087	PFN2
12:98516518-98527528:+	Y	Y	-1.24159	2.04982e-15	3.02948e-12	-0.00454464	ENSG00000120802	TMPO
12:40742470-40763095:+	Y	Y	-1.88938	2.41329e-15	3.54409e-12	-0.00933394	ENSG00000018236	CNTN1
1:19144908-19145792:-	Y	Y	1.98528	3.89335e-15	5.68115e-12	0.1231	ENSG00000127481	UBR4
2:161319023-161367477:+	Y	Y	-0.965263	3.94289e-15	5.68115e-12	-0.00266315	ENSG00000115233	PSMD14
10:59177619-59206753:+	Y	Y	-1.70035	3.96643e-15	5.68115e-12	-0.00928415	ENSG00000165443	PHYHIPL
11:118573784-118581245:+	Y	Y	-1.54936	3.93298e-15	5.68115e-12	-0.0095886	ENSG00000095139	ARCN1
3:9449593-9452887:+	Y	Y	-1.74634	3.99807e-15	5.69134e-12	-0.0194826	ENSG00000168137	SETD5
7:82343237-82349567:-	Y	Y	-1.34868	4.20768e-15	5.9532e-12	-0.00804199	ENSG00000153956	CACNA2D1
1:235595512-235627094:-	Y	Y	-0.869929	4.59228e-15	6.45797e-12	-0.00206314	ENSG00000168243	GNG4
17:45630246-45630456:+	Y	N	2.3836	5.07317e-15	7.09125e-12	0.282963	ENSG00000204650	LINC02210
3:185936238-185936600:-	Y	N	-1.72854	5.55199e-15	7.71407e-12	-0.0402499	ENSG00000136527	TRA2B
1:243225322-243253101:-	Y	Y	-1.31626	6.17008e-15	8.52183e-12	-0.00935728	ENSG00000143702	CEP170
3:185931853-185934428:-	Y	Y	-1.60462	6.69586e-15	9.19329e-12	-0.0249087	ENSG00000136527	TRA2B
6:142170422-142189425:+	Y	Y	1.23277	6.8327e-15	9.326e-12	0.0113514	ENSG00000009844	VTA1
12:2859664-2861298:-	Y	Y	2.10561	7.57982e-15	1.02852e-11	0.0719295	ENSG00000111206	FOXM1
13:50921332-50927154:+	Y	Y	-1.59098	7.96893e-15	1.07504e-11	-0.00665349	ENSG00000136104	RNASEH2B
13:98177930-98213219:+	Y	Y	-1.72917	8.04099e-15	1.07849e-11	-0.00489333	ENSG00000152767	FARP1
8:67061423-67061629:-	Y	N	2.11118	8.33372e-15	1.11133e-11	0.193127	ENSG00000121022	COPS5
3:177079946-177086964:-	Y	Y	-1.4663	9.00366e-15	1.1938e-11	-0.00598348	ENSG00000177565	TBL1XR1
8:65780844-65780947:-	Y	N	3.94709	9.5705e-15	1.26175e-11	0.601403	ENSG00000205268	PDE7A
12:40692593-40742350:+	Y	Y	-1.67243	1.0682e-14	1.40033e-11	-0.011184	ENSG00000018236	CNTN1
1:179955143-179986168:+	Y	Y	-1.5227	1.09197e-14	1.42345e-11	-0.013732	ENSG00000135837	CEP350
1:244656522-244686596:+	Y	Y	-1.3039	1.17667e-14	1.5253e-11	-0.00505482	ENSG00000121644	DESI2
4:146187552-146189621:+	Y	Y	2.38684	1.20823e-14	1.5575e-11	0.106268	ENSG00000164167	LSM6
2:131055696-131071854:-	Y	Y	-1.13493	1.29814e-14	1.66415e-11	-0.00463165	ENSG00000152102	FAM168B
9:83666434-83669184:-	Y	N	-1.35175	1.36064e-14	1.7347e-11	-0.0113522	ENSG00000135018	UBQLN1
5:51384731-51386203:+	Y	Y	-0.887924	1.51356e-14	1.91912e-11	-0.0212363	ENSG00000016082	ISL1
1:81956061-81963743:+	Y	Y	-0.888095	1.61025e-14	2.03061e-11	-0.00753418	ENSG00000117114	ADGRL2
6:157085079-157110471:+	Y	Y	-1.5281	1.82883e-14	2.29379e-11	-0.00890521	ENSG00000049618	ARID1B
12:50402814-50412404:+	Y	Y	-1.48185	1.83885e-14	2.29395e-11	-0.00732134	ENSG00000161813	LARP4
1:216519422-216564218:-	Y	Y	-1.41418	1.9098e-14	2.35712e-11	-0.0172127	ENSG00000196482	ESRRG
8:58851806-58939301:-	Y	Y	-1.42473	1.90058e-14	2.35712e-11	-0.0094924	ENSG00000198846	TOX
13:50915476-50921177:+	Y	Y	-1.45269	2.07742e-14	2.55044e-11	-0.00754222	ENSG00000136104	RNASEH2B
1:81837058-81907016:+	Y	Y	-0.91795	2.13765e-14	2.61057e-11	-0.00664122	ENSG00000117114	ADGRL2
12:93424391-93441143:-	Y	Y	-0.946758	2.25823e-14	2.74338e-11	-0.00283706	ENSG00000177889	UBE2N
2:183024996-183037991:-	Y	Y	-1.21655	2.29898e-14	2.77835e-11	-0.00616954	ENSG00000061676	NCKAP1
20:36497817-36499241:+	Y	N	1.4555	2.57574e-14	3.09668e-11	0.0844064	ENSG00000080845	DLGAP4
4:174285434-174285574:+	Y	N	-1.60903	3.05766e-14	3.65712e-11	-0.111493	ENSG00000164118	CEP44
3:31533687-31576395:+	Y	Y	-1.43369	3.37408e-14	4.01487e-11	-0.00554647	ENSG00000163527	STT3B
5:111734984-111735429:-	Y	N	-1.86436	3.50722e-14	4.15201e-11	-0.0346438	ENSG00000134986	NREP
15:83192309-83207330:-	Y	Y	-1.45405	3.70539e-14	4.36435e-11	-0.00949734	ENSG00000166503	HDGFL3
10:28548064-28583398:+	Y	Y	-1.18613	3.90697e-14	4.57854e-11	-0.00549959	ENSG00000095787	WAC
1:235552238-235583185:-	Y	Y	-1.39357	4.05491e-14	4.72802e-11	-0.00151637	ENSG00000168243	GNG4
3:185926771-185929073:-	Y	N	-1.49467	4.33487e-14	5.02919e-11	-0.0276672	ENSG00000136527	TRA2B
5:133052358-133064979:+	Y	Y	-1.16543	4.53985e-14	5.24079e-11	-0.00238568	ENSG00000170606	HSPA4
5:138386622-138391012:+	Y	Y	-1.48935	5.3236e-14	6.11513e-11	-0.0138604	ENSG00000120733	KDM3B
8:65721798-65723540:-	Y	N	1.73609	5.61941e-14	6.42313e-11	0.124418	ENSG00000205268	PDE7A
2:235807332-235852685:+	Y	Y	-1.35853	6.1054e-14	6.94441e-11	-0.00588547	ENSG00000157985	AGAP1
3:177171418-177194063:-	Y	Y	-1.00794	6.4833e-14	7.33828e-11	-0.00753328	ENSG00000177565	TBL1XR1
11:95193523-95200910:-	Y	Y	-1.62052	6.54969e-14	7.37743e-11	-0.0105646	ENSG00000149212	SESN3
14:77287580-77287824:-	Y	N	3.09606	6.62855e-14	7.43019e-11	0.123375	ENSG00000009830	POMT2
2:8818794-8824058:-	Y	Y	2.43459	6.70815e-14	7.48327e-11	0.0225663	ENSG00000134313	KIDINS220
12:30681659-30681817:-	Y	N	-4.20069	6.79298e-14	7.54163e-11	-0.247328	ENSG00000133704	IPO8
1:227059412-227068466:-	Y	Y	-1.43486	7.40444e-14	8.18134e-11	-0.0124107	ENSG00000143776	CDC42BPA
12:105115729-105118445:+	Y	Y	2.23555	7.60718e-14	8.36552e-11	0.187929	ENSG00000136051	WASHC4
1:212859191-212863630:+	Y	Y	-1.74869	8.28184e-14	9.06447e-11	-0.0353619	ENSG00000162769	FLVCR1
6:79004437-79015081:-	Y	Y	-1.35976	8.44016e-14	9.19439e-11	-0.0105633	ENSG00000146247	PHIP
6:38003784-38061592:+	Y	Y	-1.80469	8.61888e-14	9.3452e-11	-0.0135161	ENSG00000156639	ZFAND3
14:67653499-67656411:-	Y	Y	1.75227	8.69936e-14	9.3886e-11	0.00775317	ENSG00000100568	VTI1B
15:42513174-42513209:+	Y	N	3.77274	8.85229e-14	9.5094e-11	0.580734	ENSG00000092531	SNAP23
20:33994132-34029860:+	Y	Y	-1.01349	9.28522e-14	9.92851e-11	-0.00267926	ENSG00000125970	RALY
2:71341838-71348426:+	Y	Y	-1.47713	9.33211e-14	9.93288e-11	-0.0234148	ENSG00000075292	ZNF638
9:83669328-83677726:-	Y	Y	-1.06356	9.74307e-14	1.03229e-10	-0.00721594	ENSG00000135018	UBQLN1
11:94153631-94175746:+	Y	Y	-1.7555	1.00255e-13	1.05739e-10	-0.00567575	ENSG00000110218	PANX1
14:23360834-23365007:-	Y	Y	-1.18343	1.01654e-13	1.0673e-10	-0.0396111	ENSG00000100842	EFS
7:82335252-82343053:-	Y	Y	-1.29587	1.04158e-13	1.08866e-10	-0.00701255	ENSG00000153956	CACNA2D1
7:82136677-82170549:-	Y	Y	-1.15121	1.15134e-13	1.19798e-10	-0.0091456	ENSG00000153956	CACNA2D1
18:55284409-55302415:-	Y	Y	-1.32082	1.16106e-13	1.2027e-10	-0.00529695	ENSG00000196628	TCF4
1:154266452-154266500:+	Y	N	2.76524	1.2903e-13	1.33064e-10	0.237317	ENSG00000143569	UBAP2L
2:26940173-26941356:+	Y	Y	1.466	1.34715e-13	1.38312e-10	0.0198349	ENSG00000157851	DPYSL5
12:39370262-39412570:-	Y	Y	-1.25587	1.4995e-13	1.53276e-10	-0.00355399	ENSG00000139116	KIF21A
1:50606945-50655441:-	Y	Y	-1.29409	1.53686e-13	1.55722e-10	-0.00450592	ENSG00000185104	FAF1
17:51266281-51268836:+	Y	Y	1.72259	1.53169e-13	1.55722e-10	0.0598998	ENSG00000011260	UTP18
21:37368133-37375093:+	Y	Y	-1.73764	1.64699e-13	1.66156e-10	-0.0362229	ENSG00000157540	DYRK1A
7:18594030-18629349:+	Y	Y	-1.43923	1.73465e-13	1.74241e-10	-0.0109551	ENSG00000048052	HDAC9
2:66512295-66547942:+	Y	Y	-1.146	1.79709e-13	1.79735e-10	-0.0139187	ENSG00000143995	MEIS1
7:112336172-112337727:+	Y	Y	2.19404	1.94775e-13	1.93968e-10	0.0592716	ENSG00000198839	ZNF277
18:26068558-26078075:-	Y	Y	-1.65918	1.96482e-13	1.94832e-10	-0.00924092	ENSG00000141380	SS18
9:71875084-71910633:-	Y	Y	-1.66895	1.98175e-13	1.95674e-10	-0.0252331	ENSG00000107362	ABHD17B
18:55302627-55320830:-	Y	Y	-1.56106	2.08971e-13	2.05459e-10	-0.00925651	ENSG00000196628	TCF4
1:182839936-182842544:+	Y	Y	-1.40745	2.21733e-13	2.16175e-10	-0.00755885	ENSG00000135829	DHX9
10:5699738-5709529:+	Y	Y	-1.74966	2.21354e-13	2.16175e-10	-0.0198589	ENSG00000108021	TASOR2
3:9397978-9415697:+	Y	Y	-1.79301	2.36225e-13	2.2934e-10	-0.026844	ENSG00000168137	SETD5
17:32447334-32454494:+	Y	Y	-1.09893	2.42297e-13	2.34255e-10	-0.00409013	ENSG00000108671	PSMD11
2:9591516-9620641:-	Y	Y	-0.94951	2.62077e-13	2.52326e-10	-0.000656158	ENSG00000134308	YWHAQ
11:77618533-77618687:-	Y	N	1.73773	2.6802e-13	2.56983e-10	0.195427	ENSG00000074201	CLNS1A
1:186322702-186323685:-	Y	Y	-1.97056	2.70486e-13	2.5828e-10	-0.0348406	ENSG00000047410	TPR
17:66984755-67018188:+	Y	Y	-0.900966	2.74414e-13	2.60956e-10	-0.0047829	ENSG00000075461	CACNG4
2:55028221-55046815:-	Y	Y	-1.59003	2.7706e-13	2.62397e-10	-0.00398439	ENSG00000115310	RTN4
1:51236880-51269917:+	Y	Y	-1.47788	2.91797e-13	2.74371e-10	-0.00659319	ENSG00000123091	RNF11
17:76735662-76735771:-	Y	N	-1.13818	2.92068e-13	2.74371e-10	-0.0803717	ENSG00000161547	SRSF2
16:81037499-81040524:+	Y	Y	-1.64738	3.06859e-13	2.87104e-10	-0.0428016	ENSG00000166454	ATMIN
13:48976918-49006151:+	Y	Y	-1.48853	3.25831e-13	3.0363e-10	-0.00751693	ENSG00000102531	FNDC3A
8:71317690-71321733:-	Y	Y	-1.12368	3.37274e-13	3.13036e-10	-0.017193	ENSG00000104313	EYA1
12:53467844-53468467:+	Y	N	-0.962657	3.95866e-13	3.65954e-10	-0.0197034	ENSG00000197111	PCBP2
6:52279600-52281540:-	Y	Y	-1.14993	4.03333e-13	3.71377e-10	-0.0126684	ENSG00000112118	MCM3
18:47896812-47920071:-	Y	Y	-1.32496	4.0714e-13	3.734e-10	-0.0100469	ENSG00000175387	SMAD2
17:42137879-42154888:-	Y	Y	-1.11114	4.39732e-13	4.01704e-10	-0.00280336	ENSG00000108774	RAB5C
15:57253469-57262093:+	Y	Y	-1.14006	4.506e-13	4.10018e-10	-0.00404694	ENSG00000140262	TCF12
13:98143493-98159491:+	Y	Y	-1.75189	4.57509e-13	4.14678e-10	-0.0114495	ENSG00000152767	FARP1
10:28536060-28537583:+	Y	Y	-1.62697	5.19251e-13	4.68809e-10	-0.0131122	ENSG00000095787	WAC
1:156012566-156013040:-	Y	N	-1.65278	5.69305e-13	5.12008e-10	-0.00685037	ENSG00000163479	SSR2
10:1009581-1010419:+	Y	Y	2.01258	5.7697e-13	5.16898e-10	0.0876489	ENSG00000107937	GTPBP4
9:125672644-125696216:-	Y	Y	-1.26093	5.85033e-13	5.22106e-10	-0.00524386	ENSG00000119487	MAPKAP1
13:98159599-98177816:+	Y	Y	-1.83681	5.8787e-13	5.22628e-10	-0.00854024	ENSG00000152767	FARP1
1:85324884-85350414:-	Y	Y	-1.18994	6.05508e-13	5.36253e-10	-0.00273578	ENSG00000153904	DDAH1
4:118331867-118335472:-	Y	Y	-1.28492	6.39477e-13	5.59926e-10	-0.0100787	ENSG00000164099	PRSS12
7:139265183-139265462:+	N	N	3.46018	6.3936e-13	5.59926e-10	0.174981	ENSG00000157741	UBN2
11:9392321-9402733:+	Y	Y	-1.28953	6.35144e-13	5.59926e-10	-0.00141869	ENSG00000205339	IPO7
14:96537902-96541906:+	Y	Y	-1.58884	6.76141e-13	5.89803e-10	-0.0227239	ENSG00000090060	PAPOLA
1:70230064-70230277:+	Y	N	-1.86867	6.973e-13	6.05983e-10	-0.0916332	ENSG00000116754	SRSF11
2:210468242-210471506:-	Y	Y	-1.98956	7.05531e-13	6.10847e-10	-0.0100829	ENSG00000115365	LANCL1
14:77287233-77287271:-	Y	N	3.50398	7.15444e-13	6.17128e-10	0.311746	ENSG00000009830	POMT2
1:55154371-55154466:-	Y	N	-14.4303	7.5885e-13	6.52145e-10	-0.177738	ENSG00000162402	USP24
1:26727874-26728911:+	Y	Y	-1.88593	7.7046e-13	6.59679e-10	-0.0277674	ENSG00000117713	ARID1A
15:73052806-73116539:+	Y	Y	-2.25569	7.76016e-13	6.61993e-10	-0.00605734	ENSG00000067141	NEO1
11:19984248-20022555:+	Y	Y	-1.3941	9.24061e-13	7.85398e-10	-0.0191938	ENSG00000166833	NAV2
4:39458599-39458888:-	Y	N	1.54193	9.4738e-13	8.02279e-10	0.106651	ENSG00000163682	RPL9
17:76736009-76736153:-	Y	N	-0.756352	9.79666e-13	8.26603e-10	-0.0750339	ENSG00000161547	SRSF2
10:78036530-78037193:+	Y	Y	2.29117	9.97081e-13	8.38249e-10	0.00784614	ENSG00000138326	RPS24
2:54558888-54599091:+	Y	Y	-0.953839	1.00976e-12	8.45844e-10	-0.00317729	ENSG00000115306	SPTBN1
16:69187747-69235747:+	Y	Y	-1.71653	1.09908e-12	9.15795e-10	-0.0137878	ENSG00000168807	SNTB2
22:35750458-35752612:-	Y	Y	-1.13161	1.10116e-12	9.15795e-10	-0.0134384	ENSG00000100320	RBFOX2
1:31924166-31930038:-	Y	Y	-1.62292	1.10764e-12	9.17896e-10	-0.00441159	ENSG00000184007	PTP4A2
4:174259826-174262763:-	Y	Y	-1.14742	1.11552e-12	9.21135e-10	-0.0213532	ENSG00000164117	FBXO8
17:63099358-63148227:+	Y	Y	-1.44364	1.14473e-12	9.41898e-10	-0.00987422	ENSG00000170921	TANC2
5:102755470-102808056:+	Y	Y	-1.36083	1.16085e-12	9.51791e-10	-0.00623791	ENSG00000145730	PAM
16:1964632-1964744:-	Y	N	1.46764	1.21923e-12	9.9614e-10	0.216923	ENSG00000140988	RPS2
6:50823866-50828618:+	Y	Y	-1.09663	1.24237e-12	1.01148e-09	-0.0419565	ENSG00000008196	TFAP2B
3:177099448-177110808:-	Y	Y	-1.33053	1.25527e-12	1.01841e-09	-0.00410059	ENSG00000177565	TBL1XR1
11:34056572-34063051:+	Y	Y	-1.3335	1.27735e-12	1.03272e-09	-0.00310333	ENSG00000135387	CAPRIN1
11:130123612-130123779:+	Y	N	1.19174	1.30738e-12	1.05332e-09	0.204781	ENSG00000084234	APLP2
8:129871497-129878715:-	Y	Y	-1.71871	1.32587e-12	1.06452e-09	-0.00786232	ENSG00000153310	CYRIB
8:71334175-71354781:-	Y	Y	-1.33572	1.34136e-12	1.0701e-09	-0.0323024	ENSG00000104313	EYA1
X:132669200-132708461:-	Y	Y	-1.4503	1.34204e-12	1.0701e-09	-0.00488631	ENSG00000171004	HS6ST2
4:98261570-98293404:+	Y	Y	-2.28138	1.44268e-12	1.14641e-09	-0.0126358	ENSG00000138698	RAP1GDS1
17:76735772-76735875:-	Y	N	-0.93467	1.452e-12	1.14987e-09	-0.121725	ENSG00000161547	SRSF2
9:93529581-93530710:+	Y	N	-1.98948	1.45825e-12	1.1509e-09	-0.026786	ENSG00000048828	FAM120A
18:55264596-55269830:-	Y	N	-0.782744	1.46868e-12	1.1552e-09	-0.00921111	ENSG00000196628	TCF4
13:97222532-97275631:+	Y	Y	-1.56701	1.51392e-12	1.18676e-09	-0.0153833	ENSG00000139793	MBNL2
11:46696157-46697020:-	Y	Y	2.20018	1.53946e-12	1.19868e-09	0.0465316	ENSG00000175220	ARHGAP1
18:26018381-26023612:-	Y	Y	-1.4977	1.53726e-12	1.19868e-09	-0.0066624	ENSG00000141380	SS18
18:55332300-55350358:-	Y	Y	-1.61414	1.57003e-12	1.21839e-09	-0.0110505	ENSG00000196628	TCF4
7:74674346-74684656:+	Y	Y	-1.4887	1.58531e-12	1.22616e-09	-0.00341407	ENSG00000263001	GTF2I
11:102402207-102448235:-	Y	Y	-1.16106	1.62338e-12	1.25142e-09	-0.00468601	ENSG00000152558	TMEM123
15:37066538-37083769:-	Y	Y	-1.33971	1.66348e-12	1.27809e-09	-0.0219348	ENSG00000134138	MEIS2
11:74171523-74203727:+	Y	Y	-1.38929	1.67914e-12	1.28587e-09	-0.0043983	ENSG00000214517	PPME1
3:33627081-33632291:-	Y	Y	-1.37565	1.70069e-12	1.29808e-09	-0.00449099	ENSG00000163539	CLASP2
7:143885371-143901960:-	Y	Y	-1.29524	1.71003e-12	1.30094e-09	-0.0148971	ENSG00000198420	TCAF1
10:35394879-35434110:+	Y	Y	-1.30728	1.7335e-12	1.31448e-09	-0.00699129	ENSG00000108100	CCNY
11:36277089-36277123:-	Y	N	-3.84072	1.75694e-12	1.32791e-09	-0.134484	ENSG00000110442	COMMD9
17:66965132-66984593:+	Y	Y	-0.88443	1.8053e-12	1.36004e-09	-0.00768229	ENSG00000075461	CACNG4
1:173865353-173865470:-	Y	N	-1.12399	1.83378e-12	1.37702e-09	-0.129259	ENSG00000234741	GAS5
7:92725794-92774695:-	Y	Y	-1.59992	1.84247e-12	1.37909e-09	-0.00642527	ENSG00000105810	CDK6
8:15673837-15730665:+	Y	Y	-1.14474	1.90042e-12	1.41788e-09	-0.00252427	ENSG00000104723	TUSC3
18:63340936-63341080:-	N	N	3.14957	1.93055e-12	1.43575e-09	0.154102	ENSG00000119537	KDSR
4:54048955-54049038:-	Y	N	-3.92207	1.94012e-12	1.43826e-09	-0.252524	ENSG00000109220	CHIC2
20:35707993-35708803:-	Y	Y	-2.04022	2.02455e-12	1.49607e-09	-0.0488972	ENSG00000131051	RBM39
7:133356574-133374827:+	Y	Y	-1.4697	2.07223e-12	1.52644e-09	-0.00329686	ENSG00000131558	EXOC4
14:51652218-51689690:+	Y	Y	-1.51413	2.16049e-12	1.58641e-09	-0.0171349	ENSG00000139926	FRMD6
10:87875487-87878258:+	Y	Y	-1.77124	2.20854e-12	1.6115e-09	-0.0128306	ENSG00000171862	PTEN
20:58908044-58908915:+	Y	N	-1.4559	2.20654e-12	1.6115e-09	-0.00134486	ENSG00000087460	GNAS
17:1369742-1398832:-	Y	Y	-0.724702	2.31851e-12	1.68644e-09	-0.000533599	ENSG00000108953	YWHAE
1:85404529-85464742:-	Y	Y	-1.26708	2.43944e-12	1.76885e-09	-0.00633576	ENSG00000153904	DDAH1
7:140850213-140924565:-	Y	Y	-1.89784	2.46197e-12	1.77963e-09	-0.0375207	ENSG00000157764	BRAF
7:158687443-158689818:-	Y	Y	2.35351	2.47383e-12	1.78265e-09	0.19039	ENSG00000146918	NCAPG2
12:754325-813641:+	Y	Y	-1.0264	2.52783e-12	1.81592e-09	-0.00257349	ENSG00000060237	WNK1
2:216117039-216117740:+	Y	N	-0.814601	2.64914e-12	1.89719e-09	-0.0109719	ENSG00000079246	XRCC5
8:55880104-55940233:+	Y	Y	-1.10374	2.75387e-12	1.96613e-09	-0.00813453	ENSG00000254087	LYN
12:45731315-45755930:+	Y	Y	-1.32263	2.94789e-12	2.09819e-09	-0.0186628	ENSG00000189079	ARID2
21:43675164-43676271:+	Y	Y	1.95781	3.05709e-12	2.16927e-09	0.0531808	ENSG00000160208	RRP1B
11:66264445-66265022:+	Y	Y	2.19185	3.13277e-12	2.21619e-09	0.0669861	ENSG00000174996	KLC2
1:180682412-180774078:+	Y	Y	-1.12952	3.32692e-12	2.34638e-09	-0.00173447	ENSG00000143324	XPR1
9:131394264-131430089:+	Y	Y	-1.51943	3.37296e-12	2.37164e-09	-0.0359267	ENSG00000288701	PRRC2B
16:1964745-1964803:-	Y	N	1.03283	3.40467e-12	2.3867e-09	0.180169	ENSG00000140988	RPS2
3:177164002-177171389:-	Y	Y	-1.09438	3.66302e-12	2.56007e-09	-0.00744817	ENSG00000177565	TBL1XR1
2:66496201-66508926:+	Y	Y	-1.05801	3.99924e-12	2.78667e-09	-0.0106466	ENSG00000143995	MEIS1
1:44221641-44230316:-	Y	Y	-1.06	4.13211e-12	2.87063e-09	-0.00438431	ENSG00000117419	ERI3
2:227472589-227491546:+	Y	Y	-1.78361	4.23406e-12	2.92395e-09	-0.0101702	ENSG00000173744	AGFG1
18:55260028-55261089:-	Y	Y	-1.38904	4.23107e-12	2.92395e-09	-0.0110076	ENSG00000196628	TCF4
4:17805226-17809424:-	Y	Y	-1.27481	4.40862e-12	3.03546e-09	-0.0617263	ENSG00000163257	DCAF16
3:133046021-133074314:+	Y	Y	-1.80167	4.58334e-12	3.14642e-09	-0.0268893	ENSG00000144868	TMEM108
3:185936601-185937420:-	Y	N	-1.15596	4.6294e-12	3.16867e-09	-0.0312191	ENSG00000136527	TRA2B
3:132450848-132453297:+	Y	Y	2.16682	4.7032e-12	3.20971e-09	0.1304	ENSG00000138246	DNAJC13
5:43659351-43675510:+	Y	Y	-1.21409	4.75709e-12	3.23697e-09	-0.00415858	ENSG00000112992	NNT
3:41200382-41220550:+	Y	Y	-1.18895	4.79358e-12	3.25226e-09	-0.00704823	ENSG00000168036	CTNNB1
1:81953446-81955766:+	Y	Y	-1.12492	4.86975e-12	3.26574e-09	-0.00834163	ENSG00000117114	ADGRL2
2:74003167-74046277:+	Y	Y	-1.26038	4.84149e-12	3.26574e-09	-0.0126621	ENSG00000187605	TET3
7:139360323-139371386:+	Y	Y	-1.1897	4.85691e-12	3.26574e-09	-0.0120707	ENSG00000146963	LUC7L2
X:41853228-41922929:-	Y	Y	-1.5622	4.84456e-12	3.26574e-09	-0.0063157	ENSG00000147044	CASK
2:70227840-70228343:-	N	N	-1.59273	5.01642e-12	3.35441e-09	-0.0945364	ENSG00000116001	TIA1
18:47870565-47886818:-	Y	Y	-1.09774	5.06224e-12	3.37532e-09	-0.00415823	ENSG00000175387	SMAD2
22:46351650-46352120:+	Y	N	1.77619	5.10078e-12	3.39128e-09	0.242687	ENSG00000100416	TRMU
20:5917981-5922334:+	Y	Y	1.24665	5.1488e-12	3.41342e-09	0.0129586	ENSG00000089199	CHGB
3:122467430-122496436:-	Y	Y	-1.66645	5.27531e-12	3.48732e-09	-0.0039107	ENSG00000114030	KPNA1
19:5653421-5654060:+	Y	Y	2.84615	5.362e-12	3.53456e-09	0.2778	ENSG00000160633	SAFB
9:125844983-125865270:+	Y	Y	-1.60409	5.96782e-12	3.92277e-09	-0.0150021	ENSG00000167081	PBX3
10:26759239-26763879:-	Y	Y	-1.80151	6.05401e-12	3.96818e-09	-0.0257056	ENSG00000136754	ABI1
2:8974436-9003539:-	Y	Y	-1.7471	6.1174e-12	3.99844e-09	-0.0184528	ENSG00000143797	MBOAT2
3:177065023-177078631:-	Y	Y	-1.36131	6.16684e-12	4.01474e-09	-0.00575206	ENSG00000177565	TBL1XR1
18:55551761-55553209:-	Y	Y	-1.68002	6.17695e-12	4.01474e-09	-0.0218173	ENSG00000196628	TCF4
14:45110818-45112317:+	Y	Y	2.98857	6.30506e-12	4.08656e-09	0.261959	ENSG00000185246	PRPF39
17:67357579-67361094:-	Y	Y	-1.14988	6.36238e-12	4.11222e-09	-0.00767535	ENSG00000197170	PSMD12
13:35522033-35550476:+	Y	Y	-1.01845	6.43004e-12	4.14441e-09	-0.00426341	ENSG00000172915	NBEA
12:78964151-78977521:+	Y	Y	-1.62876	6.49015e-12	4.17156e-09	-0.00399037	ENSG00000067715	SYT1
4:169156680-169268819:-	Y	Y	-1.60401	6.55476e-12	4.20145e-09	-0.00977758	ENSG00000154447	SH3RF1
11:78364104-78417645:-	Y	Y	-1.38857	6.86545e-12	4.38848e-09	-0.0250246	ENSG00000033327	GAB2
4:98379491-98387435:+	Y	Y	-2.00816	7.20309e-12	4.57723e-09	-0.0126665	ENSG00000138698	RAP1GDS1
9:5656691-5689958:+	Y	Y	-1.53139	7.19089e-12	4.57723e-09	-0.00739929	ENSG00000107036	RIC1
9:129828442-129829204:-	Y	N	4.02042	7.21992e-12	4.57723e-09	0.199522	ENSG00000136819	C9orf78
5:72116454-72179627:+	Y	Y	-0.931228	7.47117e-12	4.72361e-09	-0.00280037	ENSG00000131711	MAP1B
2:209680828-209684632:+	Y	Y	-1.18751	7.57243e-12	4.77463e-09	-0.00830309	ENSG00000078018	MAP2
9:106863356-106923353:+	Y	Y	-1.53983	7.61841e-12	4.7906e-09	-0.0314773	ENSG00000148143	ZNF462
12:22640432-22643762:+	Y	N	-1.87892	7.70695e-12	4.83318e-09	-0.00779435	ENSG00000139163	ETNK1
7:32963703-32974594:+	Y	Y	-1.57362	7.91293e-12	4.94897e-09	-0.00232001	ENSG00000122642	FKBP9
7:8071132-8078611:+	Y	Y	-1.33056	7.95316e-12	4.96076e-09	-0.0138551	ENSG00000106415	GLCCI1
14:77305861-77306245:-	Y	N	1.94413	8.24365e-12	5.12817e-09	0.19336	ENSG00000009830	POMT2
15:78542684-78543817:+	Y	Y	1.53262	8.27963e-12	5.13678e-09	0.0324764	ENSG00000041357	PSMA4
10:32938731-32951674:-	Y	Y	-1.20299	8.52632e-12	5.27573e-09	-0.00603196	ENSG00000150093	ITGB1
17:82520308-82559339:+	Y	Y	-1.07626	8.64303e-12	5.33371e-09	-0.00543619	ENSG00000141568	FOXK2
1:193203853-193212064:+	Y	Y	-1.41047	8.99931e-12	5.53885e-09	-0.0123458	ENSG00000134371	CDC73
9:111444495-111451424:-	Y	Y	-1.82052	9.02602e-12	5.54059e-09	-0.00627529	ENSG00000136813	ECPAS
15:26590269-26611857:-	Y	Y	-2.34022	9.50489e-12	5.81915e-09	-0.0060585	ENSG00000166206	GABRB3
12:68714379-68715626:+	Y	Y	-1.31145	9.6362e-12	5.88401e-09	-0.0277627	ENSG00000111581	NUP107
3:33799539-33811062:+	Y	Y	-1.09941	9.87671e-12	5.9993e-09	-0.0058846	ENSG00000170248	PDCD6IP
14:77286983-77287012:-	Y	N	3.67652	9.85708e-12	5.9993e-09	0.247483	ENSG00000009830	POMT2
X:16869494-16869886:-	Y	N	1.78184	9.99197e-12	6.05346e-09	0.0690695	ENSG00000102054	RBBP7
1:150409053-150417595:+	Y	Y	-1.57704	1.00634e-11	6.08089e-09	-0.00440146	ENSG00000163125	RPRD2
7:8142056-8143874:-	Y	Y	1.66018	1.01084e-11	6.09219e-09	0.0569517	ENSG00000003147	ICA1
6:154795140-154801970:+	Y	Y	-1.66463	1.03198e-11	6.20351e-09	-0.0121963	ENSG00000213079	SCAF8
15:72496859-72518066:+	Y	Y	-1.3394	1.03659e-11	6.21507e-09	-0.0124625	ENSG00000166233	ARIH1
1:50596217-50606846:-	Y	Y	-1.4944	1.07113e-11	6.40562e-09	-0.00284875	ENSG00000185104	FAF1
1:163172593-163187878:-	Y	Y	-1.08142	1.11407e-11	6.64531e-09	-0.000827606	ENSG00000143248	RGS5
X:16869255-16869493:-	Y	Y	3.00947	1.17855e-11	7.01189e-09	0.0837497	ENSG00000102054	RBBP7
8:18006054-18006225:+	Y	N	2.11922	1.18229e-11	7.01614e-09	0.295708	ENSG00000078674	PCM1
18:63344342-63344409:-	Y	N	2.96862	1.2308e-11	7.28541e-09	0.28196	ENSG00000119537	KDSR
12:116237706-116276061:-	Y	Y	-1.73397	1.28324e-11	7.57644e-09	-0.0118803	ENSG00000123066	MED13L
15:73599587-73632601:-	Y	Y	-1.57906	1.30491e-11	7.68489e-09	-0.00855503	ENSG00000156642	NPTN
19:58547135-58547139:+	Y	N	-2.26332	1.31382e-11	7.71775e-09	-0.0359075	ENSG00000130726	TRIM28
7:140794468-140799053:-	Y	Y	-1.76866	1.37893e-11	8.07976e-09	-0.0269874	ENSG00000157764	BRAF
15:57118434-57129782:+	Y	Y	-1.31095	1.43827e-11	8.40623e-09	-0.00670347	ENSG00000140262	TCF12
2:191248009-191262998:+	Y	Y	-0.923336	1.48489e-11	8.6569e-09	-0.00375848	ENSG00000128641	MYO1B
1:27897708-27906927:-	Y	Y	-1.05136	1.5663e-11	9.10865e-09	-0.00445326	ENSG00000117748	RPA2
2:209697052-209700276:+	Y	Y	-1.44383	1.57114e-11	9.11392e-09	-0.00816788	ENSG00000078018	MAP2
2:176270420-176296859:+	Y	Y	-1.34663	1.59227e-11	9.21351e-09	-0.0146733	ENSG00000128654	MTX2
3:49318775-49324696:-	Y	Y	-1.47264	1.66624e-11	9.61753e-09	-0.0504364	ENSG00000114316	USP4
2:42245689-42256500:+	Y	Y	-1.28117	1.67871e-11	9.66543e-09	-0.0055073	ENSG00000143924	EML4
3:52695421-52695587:-	Y	N	-4.39468	1.72207e-11	9.89058e-09	-0.17229	ENSG00000016864	GLT8D1
11:94768561-94795010:+	Y	Y	-1.18557	1.74682e-11	1.00079e-08	-0.00561091	ENSG00000166025	AMOTL1
1:225580258-225595207:-	Y	Y	-1.36569	1.78291e-11	1.01896e-08	-0.00283923	ENSG00000154380	ENAH
22:29291929-29292136:+	Y	N	-1.66509	1.79194e-11	1.0216e-08	-0.0635885	ENSG00000182944	EWSR1
9:125797466-125843712:+	Y	Y	-1.59825	1.79873e-11	1.02296e-08	-0.0175566	ENSG00000167081	PBX3
2:209710813-209723594:+	Y	Y	-1.28575	1.81254e-11	1.02829e-08	-0.00602512	ENSG00000078018	MAP2
8:15733646-15743443:+	Y	Y	-1.62378	1.81787e-11	1.0288e-08	-0.00463798	ENSG00000104723	TUSC3
1:149924015-149925835:-	Y	Y	-1.09805	1.84131e-11	1.03953e-08	-0.0306496	ENSG00000143368	SF3B4
12:42351885-42351959:+	Y	N	1.75776	1.87036e-11	1.05133e-08	0.217917	ENSG00000134283	PPHLN1
18:79930312-79933968:-	Y	Y	-2.75667	1.87128e-11	1.05133e-08	-0.0117591	ENSG00000122490	SLC66A2
12:115975739-115978326:-	Y	Y	-1.89949	1.87811e-11	1.05262e-08	-0.0175245	ENSG00000123066	MED13L
14:96534890-96535524:+	Y	Y	-1.81415	1.89985e-11	1.06224e-08	-0.0336157	ENSG00000090060	PAPOLA
2:168456619-168547595:+	Y	Y	-1.35677	1.93385e-11	1.07865e-08	-0.00378042	ENSG00000172292	CERS6
6:157175841-157180968:+	Y	Y	-1.51194	1.96199e-11	1.09173e-08	-0.0189684	ENSG00000049618	ARID1B
2:175121541-175126792:-	Y	Y	-1.55404	1.98968e-11	1.10184e-08	-0.0116872	ENSG00000115966	ATF2
17:76735876-76736008:-	Y	N	-0.837522	1.98848e-11	1.10184e-08	-0.0880268	ENSG00000161547	SRSF2
9:116863734-116975207:-	Y	Y	-1.42071	2.02642e-11	1.11952e-08	-0.00508451	ENSG00000148219	ASTN2
5:95732752-95736888:+	Y	Y	-1.51242	2.06449e-11	1.13784e-08	-0.00835535	ENSG00000164292	RHOBTB3
11:95224485-95230782:-	Y	Y	-1.32573	2.07736e-11	1.14222e-08	-0.0185451	ENSG00000149212	SESN3
7:86965976-87059324:-	Y	Y	-3.08838	2.09894e-11	1.15136e-08	-0.445225	ENSG00000164659	ELAPOR2
10:118730411-118754395:-	Y	Y	-1.13632	2.21873e-11	1.2142e-08	-0.00681429	ENSG00000151893	CACUL1
20:35729552-35731359:-	Y	Y	-1.17102	2.23527e-11	1.22038e-08	-0.0251551	ENSG00000131051	RBM39
17:67361262-67362775:-	Y	Y	-1.4955	2.26055e-11	1.23128e-08	-0.0104583	ENSG00000197170	PSMD12
5:139314737-139315145:+	Y	N	-1.38121	2.30732e-11	1.25381e-08	-0.0253039	ENSG00000015479	MATR3
5:168568999-168578633:-	Y	Y	-1.08049	2.42989e-11	1.31733e-08	-0.0169519	ENSG00000120137	PANK3
7:66241271-66286510:+	Y	Y	-1.32336	2.4858e-11	1.34441e-08	-0.00449852	ENSG00000169902	TPST1
11:65121822-65121915:-	Y	N	0.797269	2.49143e-11	1.34441e-08	0.0447228	ENSG00000149806	FAU
8:109563536-109564438:+	Y	Y	2.18275	2.51472e-11	1.35383e-08	0.142875	ENSG00000147654	EBAG9
4:24533055-24534199:-	Y	N	-1.51139	2.53534e-11	1.36177e-08	-0.0177617	ENSG00000109606	DHX15
4:75662842-75670361:-	Y	Y	-1.15625	2.56385e-11	1.3739e-08	-0.00270614	ENSG00000138757	G3BP2
12:123989443-123997705:+	Y	Y	-1.08612	2.58775e-11	1.38351e-08	-0.00697116	ENSG00000179195	ZNF664
3:16434771-16471960:-	Y	Y	-1.2512	2.6123e-11	1.38705e-08	-0.00514598	ENSG00000131378	RFTN1
7:129019996-129041556:-	Y	Y	-0.957952	2.6094e-11	1.38705e-08	-0.0051307	ENSG00000064419	TNPO3
7:137623555-137645471:-	Y	Y	-2.28385	2.60616e-11	1.38705e-08	-0.0399839	ENSG00000157680	DGKI
7:2590107-2593021:+	Y	Y	3.51452	2.65654e-11	1.40469e-08	0.293808	ENSG00000106012	IQCE
15:57219591-57231151:+	Y	Y	-1.7292	2.65762e-11	1.40469e-08	-0.00609473	ENSG00000140262	TCF12
20:58418364-58431032:+	Y	Y	-1.10788	2.70526e-11	1.42662e-08	-0.00959175	ENSG00000124164	VAPB
14:59746482-59870389:-	Y	Y	-2.67487	2.7388e-11	1.43777e-08	-0.015546	ENSG00000139970	RTN1
17:59620295-59643499:+	Y	Y	-0.860651	2.73851e-11	1.43777e-08	-0.00247317	ENSG00000141367	CLTC
2:153872304-153900935:+	Y	Y	-1.88238	2.78962e-11	1.46115e-08	-0.015285	ENSG00000144278	GALNT13
22:35746562-35748632:-	Y	N	-1.3635	2.88529e-11	1.50785e-08	-0.012029	ENSG00000100320	RBFOX2
1:161865956-161870971:+	Y	Y	-1.68685	2.89759e-11	1.51088e-08	-0.0110673	ENSG00000118217	ATF6
11:19813856-19832483:+	Y	Y	-1.31687	2.98439e-11	1.55264e-08	-0.0064791	ENSG00000166833	NAV2
13:73846374-73939089:-	Y	Y	-1.25127	3.07507e-11	1.59625e-08	-0.00680017	ENSG00000118922	KLF12
12:39412711-39442926:-	Y	Y	-1.09491	3.1446e-11	1.62869e-08	-0.00613405	ENSG00000139116	KIF21A
20:36499322-36499587:+	N	N	1.72661	3.16679e-11	1.63653e-08	0.125389	ENSG00000080845	DLGAP4
2:8958643-8974358:-	Y	Y	-1.70009	3.24328e-11	1.66863e-08	-0.0111946	ENSG00000143797	MBOAT2
5:173893184-173910522:+	Y	Y	-1.70682	3.239e-11	1.66863e-08	-0.0117599	ENSG00000113742	CPEB4
17:1662154-1672940:-	Y	Y	-1.03004	3.30644e-11	1.69736e-08	-0.00182868	ENSG00000174231	PRPF8
1:153663277-153664042:-	Y	Y	-1.14623	3.4253e-11	1.75063e-08	-0.00501231	ENSG00000143621	ILF2
17:75001490-75001874:+	N	N	1.92736	3.42265e-11	1.75063e-08	0.123923	ENSG00000109089	CDR2L
5:36962275-36970875:+	Y	Y	-1.79657	3.43664e-11	1.75256e-08	-0.0165586	ENSG00000164190	NIPBL
8:71299721-71317551:-	Y	Y	-1.41225	3.59083e-11	1.8242e-08	-0.00749742	ENSG00000104313	EYA1
17:49622877-49636196:-	Y	Y	-1.49006	3.59282e-11	1.8242e-08	-0.00441835	ENSG00000121067	SPOP
5:111731047-111734487:-	Y	Y	-1.00455	3.63496e-11	1.83911e-08	-0.019229	ENSG00000134986	NREP
20:36497067-36497446:+	Y	Y	1.46867	3.63805e-11	1.83911e-08	0.119338	ENSG00000080845	DLGAP4
1:44339323-44352849:-	Y	Y	-1.15579	3.80386e-11	1.91875e-08	-0.0129144	ENSG00000117419	ERI3
2:66509124-66512148:+	Y	Y	-1.41558	3.83324e-11	1.92938e-08	-0.0104099	ENSG00000143995	MEIS1
2:184599071-184866368:+	Y	Y	-2.34903	3.85405e-11	1.93229e-08	-0.0714713	ENSG00000170396	ZNF804A
17:44351164-44351300:+	Y	N	2.52051	3.85569e-11	1.93229e-08	0.0582397	ENSG00000030582	GRN
9:14125767-14146688:-	Y	Y	-1.32237	3.87941e-11	1.93999e-08	-0.0124246	ENSG00000147862	NFIB
7:139371464-139374400:+	Y	Y	-1.68599	3.9202e-11	1.95617e-08	-0.0121735	ENSG00000146963	LUC7L2
6:101891419-101923957:+	Y	Y	-1.8156	4.0352e-11	2.00923e-08	-0.0540644	ENSG00000164418	GRIK2
1:211267871-211271231:+	Y	Y	-1.77701	4.13823e-11	2.05613e-08	-0.0122907	ENSG00000117625	RCOR3
1:24797964-24814093:+	Y	Y	-1.09821	4.16497e-11	2.06186e-08	-0.00276663	ENSG00000169504	CLIC4
12:69258190-69258589:+	Y	Y	-1.35441	4.17643e-11	2.06186e-08	-0.0292437	ENSG00000111605	CPSF6
16:28181123-28208986:-	Y	Y	-1.06303	4.17359e-11	2.06186e-08	-0.00456981	ENSG00000169180	XPO6
4:1871543-1887500:+	Y	Y	-1.11105	4.39622e-11	2.16576e-08	-0.0277403	ENSG00000109685	NSD2
10:115096840-115120184:+	Y	Y	-1.75358	4.47738e-11	2.20107e-08	-0.0198866	ENSG00000107518	ATRNL1
9:14102511-14112998:-	Y	Y	-1.24756	4.53309e-11	2.22374e-08	-0.0198294	ENSG00000147862	NFIB
1:70230278-70230556:+	Y	N	-1.7098	4.60579e-11	2.25464e-08	-0.0763648	ENSG00000116754	SRSF11
10:96044463-96050255:+	Y	Y	-1.43695	4.70927e-11	2.30044e-08	-0.0361881	ENSG00000107443	CCNJ
21:25911963-25945523:-	Y	Y	-0.819618	4.83094e-11	2.35492e-08	-0.00078009	ENSG00000142192	APP
1:45882396-45913587:+	Y	Y	-1.45068	4.92407e-11	2.39028e-08	-0.0113403	ENSG00000086015	MAST2
17:27297309-27301766:+	Y	Y	-1.24913	4.91969e-11	2.39028e-08	-0.0145787	ENSG00000109046	WSB1
17:47579512-47582200:+	Y	N	-1.90196	4.99805e-11	2.42112e-08	-0.0376413	ENSG00000141279	NPEPPS
12:22644588-22646018:+	Y	Y	-2.06887	5.09097e-11	2.461e-08	-0.0208282	ENSG00000139163	ETNK1
7:77545798-77563935:+	Y	Y	-1.28394	5.12422e-11	2.47192e-08	-0.0232746	ENSG00000127947	PTPN12
12:40763199-40828058:+	Y	Y	-1.79795	5.1586e-11	2.48334e-08	-0.00824384	ENSG00000018236	CNTN1
5:58689331-58726001:+	Y	Y	-1.6865	5.23768e-11	2.51619e-08	-0.00412989	ENSG00000152932	RAB3C
15:37031323-37036390:-	Y	Y	-0.970023	5.27423e-11	2.52852e-08	-0.0154002	ENSG00000134138	MEIS2
7:64578131-64599658:+	Y	Y	-1.80843	5.29019e-11	2.53094e-08	-0.0596614	ENSG00000286456	NA
8:6738551-6741660:+	Y	Y	-1.79631	5.40718e-11	2.58158e-08	-0.00735086	ENSG00000155189	AGPAT5
18:47851328-47865058:-	Y	Y	-1.02223	5.44355e-11	2.59361e-08	-0.00460439	ENSG00000175387	SMAD2
8:123030720-123041969:-	Y	Y	-1.33205	5.47334e-11	2.60246e-08	-0.00409837	ENSG00000136986	DERL1
20:510339-526695:-	Y	Y	-0.775417	5.58415e-11	2.64972e-08	-0.00199388	ENSG00000101266	CSNK2A1
1:24650628-24651408:+	Y	Y	-1.76261	5.77742e-11	2.73583e-08	-0.0297401	ENSG00000133226	SRRM1
12:12121421-12124564:-	Y	Y	-1.63798	5.83067e-11	2.75542e-08	-0.0266684	ENSG00000070018	LRP6
1:81963744-81965853:+	Y	N	-1.37035	5.91856e-11	2.79127e-08	-0.00988939	ENSG00000117114	ADGRL2
6:53295708-53348816:-	Y	Y	-1.08531	6.17312e-11	2.90543e-08	-0.00930997	ENSG00000012660	ELOVL5
1:239387338-239408219:+	Y	Y	-1.67701	6.2445e-11	2.92714e-08	-0.0354508	ENSG00000133019	CHRM3
4:118769841-118797682:-	Y	Y	-1.29769	6.23891e-11	2.92714e-08	-0.00425575	ENSG00000150961	SEC24D
16:89560840-89560903:+	Y	N	1.00736	6.39204e-11	2.99026e-08	0.033231	ENSG00000167526	RPL13
5:78969193-78984936:-	Y	Y	-1.71992	6.47438e-11	3.02269e-08	-0.00380261	ENSG00000113273	ARSB
10:87867050-87874918:+	Y	Y	-1.21535	6.5454e-11	3.04971e-08	-0.0145479	ENSG00000171862	PTEN
7:7970506-8003896:+	Y	Y	-1.43781	6.67039e-11	3.10158e-08	-0.0158216	ENSG00000106415	GLCCI1
7:32879943-32887976:-	Y	Y	-1.19684	6.68347e-11	3.10158e-08	-0.0200879	ENSG00000170852	KBTBD2
14:69380641-69386654:-	Y	Y	-1.03868	6.74765e-11	3.12512e-08	-0.00278161	ENSG00000100632	ERH
7:96309692-96321941:-	Y	Y	-1.32783	6.85528e-11	3.16864e-08	-0.00729976	ENSG00000004864	SLC25A13
2:131071939-131079349:-	Y	Y	-1.26218	6.87733e-11	3.17251e-08	-0.00962176	ENSG00000152102	FAM168B
2:224563321-224569688:-	Y	Y	-1.28844	6.97119e-11	3.20943e-08	-0.00598115	ENSG00000036257	CUL3
5:72848499-72851204:+	Y	Y	-0.904197	7.04427e-11	3.23665e-08	-0.014975	ENSG00000083312	TNPO1
11:46697021-46697284:-	Y	N	2.77636	7.0837e-11	3.24834e-08	0.0947305	ENSG00000175220	ARHGAP1
2:183133624-183151507:+	Y	Y	-1.34603	7.13242e-11	3.26423e-08	-0.0179772	ENSG00000163002	NUP35
4:151266247-151325240:-	Y	Y	-2.20931	7.16517e-11	3.27276e-08	-0.0455368	ENSG00000109686	SH3D19
1:109548839-109573736:+	Y	Y	-1.15183	7.24073e-11	3.29547e-08	-0.00196195	ENSG00000065135	GNAI3
2:188588702-188589590:+	Y	N	-1.87167	7.24328e-11	3.29547e-08	-0.0949469	ENSG00000144366	GULP1
19:41281276-41291878:+	Y	Y	-0.94992	7.29618e-11	3.31303e-08	-0.00206676	ENSG00000105323	HNRNPUL1
4:118889142-119023429:+	Y	Y	-1.26958	7.52003e-11	3.40801e-08	-0.0154604	ENSG00000172403	SYNPO2
10:87326675-87329771:-	Y	Y	-1.88528	7.56532e-11	3.42185e-08	-0.0159854	ENSG00000223482	NUTM2A-AS1
7:82170610-82335134:-	Y	Y	-1.01107	7.68729e-11	3.47026e-08	-0.01184	ENSG00000153956	CACNA2D1
3:78746901-78938600:-	Y	Y	-1.626	7.78474e-11	3.50742e-08	-0.00755672	ENSG00000169855	ROBO1
10:26755742-26759061:-	Y	Y	-1.87053	7.8192e-11	3.50932e-08	-0.0192358	ENSG00000136754	ABI1
18:51177577-51192909:-	Y	Y	-1.64026	7.80993e-11	3.50932e-08	-0.0259575	ENSG00000176624	MEX3C
1:169829450-169830258:+	Y	Y	1.90146	8.00198e-11	3.58442e-08	0.108406	ENSG00000000460	C1orf112
21:26068339-26089510:-	Y	Y	-1.29272	8.32671e-11	3.7227e-08	-0.00191564	ENSG00000142192	APP
1:224429297-224431476:-	Y	N	-1.40032	8.51921e-11	3.80143e-08	-0.0326596	ENSG00000162923	WDR26
7:8055775-8060095:+	Y	Y	-1.22895	8.54854e-11	3.8072e-08	-0.00779184	ENSG00000106415	GLCCI1
2:61534679-61535870:-	Y	N	-1.40098	8.71243e-11	3.86535e-08	-0.0251921	ENSG00000082898	XPO1
20:5128751-5173522:+	Y	Y	-1.06099	8.70928e-11	3.86535e-08	-0.00423663	ENSG00000101290	CDS2
10:119580847-119581732:-	Y	Y	-1.39834	8.86015e-11	3.92339e-08	-0.0338121	ENSG00000151923	TIAL1
6:99411736-99411790:-	Y	N	2.20335	9.24189e-11	4.07687e-08	0.369375	ENSG00000132424	PNISR
15:42513336-42513398:+	Y	N	3.57763	9.23555e-11	4.07687e-08	0.546224	ENSG00000092531	SNAP23
1:172533498-172551511:+	Y	Y	-1.18999	9.65563e-11	4.2513e-08	-0.0130633	ENSG00000094975	SUCO
2:170936728-170948349:+	Y	Y	-1.15164	1.03318e-10	4.54038e-08	-0.00514297	ENSG00000115806	GORASP2
5:111734488-111734669:-	Y	N	-1.27031	1.08396e-10	4.75453e-08	-0.0381097	ENSG00000134986	NREP
7:105014536-105038125:+	Y	Y	-1.06028	1.09283e-10	4.78441e-08	-0.00795881	ENSG00000005483	KMT2E
4:24534200-24537050:-	Y	Y	-1.21179	1.09988e-10	4.80622e-08	-0.0126763	ENSG00000109606	DHX15
17:63049788-63073942:+	Y	Y	-1.71579	1.1581e-10	5.05109e-08	-0.00889307	ENSG00000170921	TANC2
4:76985124-76987787:+	Y	Y	-1.76017	1.16529e-10	5.0729e-08	-0.00648914	ENSG00000138758	SEPTIN11
18:26035924-26038554:-	Y	Y	-1.23987	1.17112e-10	5.08875e-08	-0.0220843	ENSG00000141380	SS18
8:73293151-73293342:-	Y	N	2.57296	1.18514e-10	5.14003e-08	0.202988	ENSG00000147604	RPL7
14:77287210-77287232:-	Y	N	3.08686	1.20081e-10	5.19828e-08	0.230771	ENSG00000009830	POMT2
17:63009627-63049722:+	Y	Y	-1.56867	1.21205e-10	5.2372e-08	-0.0148633	ENSG00000170921	TANC2
15:63713666-63716301:-	Y	Y	2.5323	1.23994e-10	5.3378e-08	0.189553	ENSG00000103657	HERC1
17:81870665-81870974:-	Y	N	1.04765	1.23827e-10	5.3378e-08	0.0223482	ENSG00000141522	ARHGDIA
18:36040866-36052874:-	Y	Y	-1.1147	1.25305e-10	5.38425e-08	-0.00533186	ENSG00000141425	RPRD1A
14:59610233-59630445:-	Y	Y	-1.21745	1.27601e-10	5.47281e-08	-0.0135825	ENSG00000139970	RTN1
6:2964006-2966399:-	Y	Y	-1.301	1.28962e-10	5.52096e-08	-0.0178873	ENSG00000124570	SERPINB6
7:6121491-6122200:+	N	N	2.39969	1.312e-10	5.60642e-08	0.19283	ENSG00000106346	USP42
1:167303575-167319013:+	Y	Y	-1.72363	1.34255e-10	5.72642e-08	-0.0153431	ENSG00000143190	POU2F1
13:35551033-35554986:+	Y	Y	-1.32082	1.38265e-10	5.87587e-08	-0.0079771	ENSG00000172915	NBEA
X:80745730-80791853:-	Y	Y	-1.55098	1.38046e-10	5.87587e-08	-0.0101619	ENSG00000165288	BRWD3
17:62966750-63009536:+	Y	Y	-1.91633	1.40049e-10	5.94077e-08	-0.0159719	ENSG00000170921	TANC2
6:79052061-79058998:-	Y	Y	-1.26804	1.41175e-10	5.96675e-08	-0.00979098	ENSG00000146247	PHIP
8:21921627-21964148:+	Y	Y	-1.24878	1.41147e-10	5.96675e-08	-0.00475959	ENSG00000130227	XPO7
11:95866487-95882373:-	Y	Y	-1.60815	1.48218e-10	6.25303e-08	-0.0090714	ENSG00000087053	MTMR2
9:122897577-122898110:-	Y	N	-2.02258	1.53318e-10	6.44631e-08	-0.0447799	ENSG00000056586	RC3H2
10:119575792-119576610:-	Y	Y	1.21035	1.53355e-10	6.44631e-08	0.0377349	ENSG00000151923	TIAL1
4:82354155-82354846:-	Y	N	-0.879769	1.57769e-10	6.61984e-08	-0.0170779	ENSG00000138668	HNRNPD
13:111159090-111184937:+	Y	Y	-1.37875	1.60231e-10	6.71104e-08	-0.00819841	ENSG00000102606	ARHGEF7
18:55352024-55383903:-	Y	Y	-1.08222	1.62655e-10	6.80025e-08	-0.0109767	ENSG00000196628	TCF4
1:202777582-202806489:-	Y	Y	-1.14136	1.65053e-10	6.88812e-08	-0.0067073	ENSG00000117139	KDM5B
1:51356847-51361170:-	Y	Y	-1.5542	1.7098e-10	7.12264e-08	-0.0129341	ENSG00000085832	EPS15
2:96298421-96298602:-	Y	Y	2.03398	1.72185e-10	7.15998e-08	0.0949617	ENSG00000144028	SNRNP200
3:133125150-133192774:+	Y	Y	-1.63419	1.72673e-10	7.16745e-08	-0.0100488	ENSG00000144868	TMEM108
4:48394654-48420124:+	Y	Y	-1.21894	1.77137e-10	7.32905e-08	-0.00727887	ENSG00000109171	SLAIN2
4:140868380-140911052:-	Y	Y	-1.0959	1.77198e-10	7.32905e-08	-0.00904235	ENSG00000170153	RNF150
6:105333506-105352971:-	Y	Y	-1.11292	1.78773e-10	7.38102e-08	-0.00177487	ENSG00000085377	PREP
16:47100981-47109482:-	Y	Y	-1.36754	1.8344e-10	7.56025e-08	-0.00996791	ENSG00000171208	NETO2
1:71069363-71069600:-	Y	N	-1.59794	1.85374e-10	7.62643e-08	-0.108756	ENSG00000132485	ZRANB2
1:23974974-23975029:-	Y	N	-5.59145	1.92186e-10	7.87872e-08	-0.0919491	ENSG00000188529	SRSF10
1:246417410-246483434:-	Y	Y	-1.68941	1.9195e-10	7.87872e-08	-0.0172667	ENSG00000185420	SMYD3
5:150736317-150742113:-	Y	Y	-1.27321	1.93051e-10	7.90024e-08	-0.00945087	ENSG00000132912	DCTN4
1:183024135-183096543:+	Y	Y	-1.27621	1.93683e-10	7.91216e-08	-0.00779617	ENSG00000135862	LAMC1
7:129368552-129375642:+	Y	Y	-2.82923	1.95412e-10	7.96874e-08	-0.0336408	ENSG00000158467	AHCYL2
6:136282688-136289712:-	Y	Y	-0.874587	1.96675e-10	8.0062e-08	-0.00692464	ENSG00000029363	BCLAF1
11:32589642-32593768:+	Y	Y	0.920384	2.00805e-10	8.15998e-08	0.00757981	ENSG00000149100	EIF3M
6:101859494-101879017:+	Y	Y	-1.81172	2.0177e-10	8.18486e-08	-0.00618333	ENSG00000164418	GRIK2
18:42067514-42081122:+	Y	Y	-1.39471	2.04525e-10	8.28215e-08	-0.00857461	ENSG00000078142	PIK3C3
17:44445923-44464471:-	Y	Y	-1.54972	2.06573e-10	8.35051e-08	-0.0547244	ENSG00000186566	GPATCH8
3:111982322-111986263:+	Y	Y	-1.75966	2.17614e-10	8.77017e-08	-0.0298693	ENSG00000144827	ABHD10
16:2449463-2449827:+	Y	Y	1.6855	2.18005e-10	8.77017e-08	0.0623762	ENSG00000162063	CCNF
17:20156237-20204332:+	Y	Y	-1.84644	2.18088e-10	8.77017e-08	-0.0108079	ENSG00000128487	SPECC1
6:43133722-43138552:+	Y	Y	-1.1737	2.19516e-10	8.81233e-08	-0.00558251	ENSG00000112655	PTK7
2:24799845-24814375:+	Y	Y	-1.17657	2.20118e-10	8.82121e-08	-0.00725276	ENSG00000138092	CENPO
20:41137859-41159605:+	Y	Y	-0.904953	2.22301e-10	8.89336e-08	-0.0063798	ENSG00000124181	PLCG1
2:224569826-224584943:-	Y	Y	-1.1832	2.23645e-10	8.91636e-08	-0.00633306	ENSG00000036257	CUL3
10:87089845-87091570:-	Y	N	-1.7832	2.23369e-10	8.91636e-08	-0.0146061	ENSG00000148672	GLUD1
1:183473899-183501130:+	Y	Y	-1.16943	2.24192e-10	8.92284e-08	-0.00864193	ENSG00000116698	SMG7
6:156902151-156935465:+	Y	Y	-1.23546	2.25858e-10	8.97375e-08	-0.00754662	ENSG00000049618	ARID1B
5:111735508-111755356:-	Y	Y	-0.921445	2.33713e-10	9.26999e-08	-0.00735416	ENSG00000134986	NREP
21:39345959-39347113:-	Y	N	-1.67688	2.36267e-10	9.35531e-08	-0.0284118	ENSG00000205581	HMGN1
16:1964631-1964631:-	Y	N	1.05147	2.37028e-10	9.36942e-08	0.131352	ENSG00000140988	RPS2
21:39347953-39347994:-	Y	N	-1.95448	2.46746e-10	9.737e-08	-0.0649908	ENSG00000205581	HMGN1
13:35477016-35513157:+	Y	Y	-0.913896	2.47913e-10	9.76641e-08	-0.0122842	ENSG00000172915	NBEA
1:185046296-185087551:+	Y	Y	-1.20951	2.4844e-10	9.77058e-08	-0.0128165	ENSG00000121481	RNF2
11:115287478-115399083:-	Y	Y	-1.26132	2.49645e-10	9.80139e-08	-0.0097207	ENSG00000182985	CADM1
11:124779140-124783170:-	Y	Y	-1.60808	2.55606e-10	1.00185e-07	-0.0505425	ENSG00000120458	MSANTD2
17:76353061-76353452:-	Y	N	2.18673	2.61006e-10	1.02129e-07	0.0643167	ENSG00000161542	PRPSAP1
3:150603687-150618708:+	Y	Y	-1.20372	2.76249e-10	1.07911e-07	-0.0054776	ENSG00000198843	SELENOT
2:170029449-170040881:+	Y	Y	-1.63006	2.78327e-10	1.0854e-07	-0.00579846	ENSG00000144357	UBR3
1:229607836-229610105:-	Y	Y	-2.01103	2.81035e-10	1.09229e-07	-0.00974332	ENSG00000135801	TAF5L
18:46120061-46122466:+	Y	Y	1.73048	2.80837e-10	1.09229e-07	0.026793	ENSG00000152240	HAUS1
4:17893584-17909093:-	Y	Y	-1.49645	2.84847e-10	1.10525e-07	-0.0194962	ENSG00000178177	LCORL
16:227687-227986:-	Y	N	-1.51155	2.87332e-10	1.11304e-07	-0.260579	ENSG00000007392	LUC7L
7:66209905-66221603:+	Y	Y	-1.64148	2.89178e-10	1.11832e-07	-0.00716633	ENSG00000169902	TPST1
3:77098341-77477413:+	Y	Y	-1.2769	2.91186e-10	1.12421e-07	-0.0145169	ENSG00000185008	ROBO2
12:105330938-105348601:+	Y	Y	-1.62481	2.93929e-10	1.13292e-07	-0.0045943	ENSG00000235162	C12orf75
1:42206012-42227882:-	Y	Y	-1.32996	2.95357e-10	1.13653e-07	-0.00900146	ENSG00000198815	FOXJ3
20:34033240-34059192:+	Y	Y	-0.97451	3.02329e-10	1.16143e-07	-0.00278515	ENSG00000125970	RALY
17:75149186-75152904:-	Y	Y	-1.06316	3.05555e-10	1.17189e-07	-0.0047418	ENSG00000189159	JPT1
4:39063798-39075964:+	Y	Y	-2.04497	3.07701e-10	1.1747e-07	-0.0183552	ENSG00000109790	KLHL5
7:74664577-74674094:+	Y	Y	-1.35621	3.07807e-10	1.1747e-07	-0.00343171	ENSG00000263001	GTF2I
8:67061344-67061422:-	Y	N	2.18044	3.07225e-10	1.1747e-07	0.219506	ENSG00000121022	COPS5
18:55232672-55234416:-	Y	Y	-1.12334	3.14055e-10	1.19658e-07	-0.00864631	ENSG00000196628	TCF4
20:35708804-35708991:-	Y	N	-1.58928	3.17525e-10	1.20781e-07	-0.0894991	ENSG00000131051	RBM39
10:43138568-43154896:+	Y	Y	-1.80603	3.22463e-10	1.22459e-07	-0.0466926	ENSG00000169826	CSGALNACT2
9:121193420-121201638:-	Y	Y	-1.4105	3.23455e-10	1.22635e-07	-0.00681966	ENSG00000119396	RAB14
4:186601701-186602902:-	Y	Y	-1.30301	3.25588e-10	1.23242e-07	-0.0192166	ENSG00000083857	FAT1
1:40041494-40057445:+	Y	Y	-0.80203	3.33743e-10	1.26123e-07	-0.00101235	ENSG00000131236	CAP1
1:155952829-155954901:-	Y	Y	2.97712	3.37237e-10	1.27237e-07	0.0487715	ENSG00000116584	ARHGEF2
13:33831355-33835147:+	Y	Y	-1.37287	3.46564e-10	1.30543e-07	-0.0475705	ENSG00000133119	RFC3
14:59607608-59610121:-	Y	Y	-1.26355	3.60029e-10	1.35395e-07	-0.0149074	ENSG00000139970	RTN1
1:100125882-100125942:-	Y	N	-5.98835	3.64473e-10	1.36845e-07	-0.149476	ENSG00000156876	SASS6
3:152269779-152298981:+	Y	Y	-1.58598	3.67483e-10	1.37752e-07	-0.0203719	ENSG00000152601	MBNL1
3:177110888-177131362:-	Y	Y	-1.36448	3.6831e-10	1.37839e-07	-0.00525616	ENSG00000177565	TBL1XR1
6:37930000-38003690:+	Y	Y	-1.83305	3.69277e-10	1.37979e-07	-0.0318694	ENSG00000156639	ZFAND3
7:8139048-8141764:-	Y	Y	2.28663	3.70844e-10	1.38341e-07	0.23484	ENSG00000003147	ICA1
21:25955756-25975069:-	Y	Y	-0.790444	3.75953e-10	1.40022e-07	-0.00107443	ENSG00000142192	APP
X:45106542-45106649:+	Y	N	4.36447	3.7712e-10	1.40232e-07	0.62657	ENSG00000147050	KDM6A
3:195412917-195441792:-	Y	Y	-1.55479	3.8094e-10	1.41426e-07	-0.0109049	ENSG00000114331	ACAP2
3:124080093-124082252:+	Y	Y	-2.39605	3.85546e-10	1.42907e-07	-0.0658484	ENSG00000160145	KALRN
2:85636131-85637368:+	Y	Y	1.73993	3.88157e-10	1.43645e-07	0.0281631	ENSG00000168883	USP39
1:164564016-164576783:+	Y	Y	-1.56252	3.9164e-10	1.44279e-07	-0.0342379	ENSG00000185630	PBX1
11:46948165-46987207:+	Y	Y	-1.66301	3.91733e-10	1.44279e-07	-0.0115675	ENSG00000149179	CSTPP1
17:55414233-55420091:-	Y	Y	-1.15915	3.90969e-10	1.44279e-07	-0.0111136	ENSG00000108960	MMD
8:67061630-67061853:-	Y	N	1.76552	3.93243e-10	1.44605e-07	0.165274	ENSG00000121022	COPS5
7:34973606-34987969:-	Y	Y	-1.57882	3.97151e-10	1.45811e-07	-0.00764132	ENSG00000173852	DPY19L1
3:177136246-177160870:-	Y	Y	-0.984856	4.04226e-10	1.48174e-07	-0.0052299	ENSG00000177565	TBL1XR1
1:70230619-70231094:+	Y	N	-1.31179	4.06406e-10	1.48504e-07	-0.0540808	ENSG00000116754	SRSF11
14:51914275-51939780:+	Y	Y	-1.32107	4.0621e-10	1.48504e-07	-0.00369326	ENSG00000186469	GNG2
4:95216212-95218968:-	Y	Y	-1.22132	4.16699e-10	1.52026e-07	-0.0176289	ENSG00000182168	UNC5C
1:19257454-19257521:+	Y	N	-13.3956	4.19157e-10	1.52682e-07	-0.0266104	ENSG00000053372	MRTO4
6:52273917-52275981:-	Y	Y	-1.21452	4.26796e-10	1.55221e-07	-0.0183627	ENSG00000112118	MCM3
6:85581847-85588862:-	Y	Y	-1.36513	4.40638e-10	1.60005e-07	-0.0188455	ENSG00000135317	SNX14
13:79481951-79505367:+	Y	Y	-1.44977	4.45173e-10	1.61399e-07	-0.00664764	ENSG00000102471	NDFIP2
1:155732202-155736607:+	Y	Y	-0.844759	4.46263e-10	1.61542e-07	-0.0118516	ENSG00000132676	DAP3
8:67302467-67343163:-	Y	Y	-1.63925	4.49567e-10	1.62484e-07	-0.026035	ENSG00000066777	ARFGEF1
14:57271366-57273708:+	Y	Y	-1.94959	4.52215e-10	1.63187e-07	-0.0141843	ENSG00000053770	AP5M1
14:51878045-51913008:+	Y	Y	-1.26437	4.62232e-10	1.66339e-07	-0.00764225	ENSG00000186469	GNG2
18:55550261-55551760:-	Y	N	-1.47422	4.62383e-10	1.66339e-07	-0.0157653	ENSG00000196628	TCF4
2:210441444-210455106:-	Y	Y	-1.33523	4.72244e-10	1.69623e-07	-0.0160061	ENSG00000115365	LANCL1
X:45106650-45106713:+	Y	N	4.04386	4.73699e-10	1.69883e-07	0.561751	ENSG00000147050	KDM6A
2:186694412-186740227:+	Y	Y	-1.57561	4.77314e-10	1.70915e-07	-0.00570304	ENSG00000144369	FAM171B
1:235627171-235649661:-	Y	Y	-0.764421	4.80589e-10	1.71823e-07	-0.00291639	ENSG00000168243	GNG4
1:211261203-211267774:+	Y	Y	-1.20126	4.87216e-10	1.73657e-07	-0.0202031	ENSG00000117625	RCOR3
2:55027486-55028163:-	Y	Y	-2.22889	4.86522e-10	1.73657e-07	-0.00821662	ENSG00000115310	RTN4
16:1964629-1964630:-	Y	N	1.08596	4.96818e-10	1.76808e-07	0.127259	ENSG00000140988	RPS2
15:37037389-37066296:-	Y	Y	-1.32482	5.08501e-10	1.80688e-07	-0.0119798	ENSG00000134138	MEIS2
9:131488097-131490764:+	Y	Y	-1.13202	5.09725e-10	1.80846e-07	-0.0427754	ENSG00000288701	PRRC2B
8:80821616-80873543:-	Y	Y	-1.17369	5.11716e-10	1.81275e-07	-0.00697695	ENSG00000164684	ZNF704
5:53573732-53603451:+	Y	Y	-1.39793	5.14125e-10	1.81851e-07	-0.00424865	ENSG00000164258	NDUFS4
14:55580355-55601756:+	Y	Y	-1.1298	5.15295e-10	1.81988e-07	-0.00656705	ENSG00000126777	KTN1
2:230714059-230759958:+	Y	Y	-1.05477	5.16786e-10	1.82237e-07	-0.0067877	ENSG00000135932	CAB39
3:191329724-191357087:+	Y	Y	-1.71245	5.21127e-10	1.83489e-07	-0.00476683	ENSG00000152492	CCDC50
7:96296952-96309537:-	Y	Y	-1.13691	5.3098e-10	1.86675e-07	-0.00343418	ENSG00000004864	SLC25A13
2:97888121-97907114:-	Y	Y	-1.54562	5.32049e-10	1.86768e-07	-0.00531213	ENSG00000075568	TMEM131
17:63314670-63318956:+	Y	Y	-2.22111	5.35815e-10	1.87805e-07	-0.0081236	ENSG00000170921	TANC2
11:2137192-2137287:-	Y	N	-1.04016	5.39562e-10	1.88834e-07	-0.0680801	ENSG00000167244	IGF2
3:133652630-133653344:-	Y	Y	-1.38108	5.46773e-10	1.91069e-07	-0.0370469	ENSG00000163781	TOPBP1
18:26057743-26064831:-	Y	Y	-1.68766	5.54086e-10	1.93334e-07	-0.00666112	ENSG00000141380	SS18
4:90235344-90308243:+	Y	Y	-3.05695	5.58453e-10	1.94565e-07	-0.0354015	ENSG00000184305	CCSER1
1:81941348-81942030:+	Y	N	-1.42439	5.59504e-10	1.94639e-07	-0.0250258	ENSG00000117114	ADGRL2
6:87155760-87169673:+	Y	Y	-1.58352	5.648e-10	1.96187e-07	-0.0418083	ENSG00000188994	ZNF292
1:44242081-44247938:-	Y	Y	-1.06686	5.67238e-10	1.96446e-07	-0.00434927	ENSG00000117419	ERI3
5:73499652-73502025:+	Y	N	-1.27608	5.66476e-10	1.96446e-07	-0.00172626	ENSG00000145741	BTF3
18:9925075-9931776:+	Y	Y	-1.5094	5.68522e-10	1.96597e-07	-0.00580137	ENSG00000101558	VAPA
11:28296932-28327580:+	Y	Y	-1.78158	5.70872e-10	1.97116e-07	-0.0220177	ENSG00000169519	METTL15
6:154046816-154073514:+	Y	Y	-1.75964	5.72297e-10	1.97314e-07	-0.0345407	ENSG00000112038	OPRM1
2:37317900-37324197:-	Y	Y	-1.49215	5.74973e-10	1.97942e-07	-0.0449762	ENSG00000115825	PRKD3
16:57187051-57204503:+	Y	Y	-1.17816	5.90531e-10	2.02997e-07	-0.0120814	ENSG00000159579	RSPRY1
8:90625863-90631551:-	Y	Y	-1.87845	5.95371e-10	2.0429e-07	-0.0108624	ENSG00000180694	TMEM64
13:98345611-98365394:+	Y	Y	-1.45345	5.96051e-10	2.0429e-07	-0.00465781	ENSG00000152767	FARP1
2:73939023-73946718:+	Y	Y	-0.987861	6.0098e-10	2.05675e-07	-0.00400002	ENSG00000114956	DGUOK
5:171405404-171405732:+	Y	N	-1.34481	6.05966e-10	2.07076e-07	-0.0118753	ENSG00000181163	NPM1
6:154822410-154824233:+	Y	Y	-1.81223	6.06897e-10	2.07089e-07	-0.0151384	ENSG00000213079	SCAF8
3:133081006-133119037:+	Y	Y	-1.6792	6.0932e-10	2.07345e-07	-0.017134	ENSG00000144868	TMEM108
9:112575252-112617870:+	Y	Y	-1.2418	6.09434e-10	2.07345e-07	-0.0156829	ENSG00000165185	KIAA1958
17:35641976-35650529:+	Y	Y	-1.03921	6.19901e-10	2.10598e-07	-0.00231541	ENSG00000006125	AP2B1
2:71334597-71341709:+	Y	Y	-1.31504	6.30007e-10	2.13718e-07	-0.020886	ENSG00000075292	ZNF638
4:105761886-105822953:+	Y	Y	-1.63265	6.40705e-10	2.1703e-07	-0.0110287	ENSG00000138780	GSTCD
13:93227617-93545262:+	Y	Y	-1.70885	6.64845e-10	2.24879e-07	-0.0244594	ENSG00000183098	GPC6
1:81936838-81941192:+	Y	Y	-1.07009	6.74356e-10	2.27763e-07	-0.0139867	ENSG00000117114	ADGRL2
3:81670983-81705443:-	Y	Y	-2.55042	6.82771e-10	2.30271e-07	-0.00995972	ENSG00000114480	GBE1
2:165880800-165883789:-	Y	Y	2.48529	7.06581e-10	2.37955e-07	0.0706875	ENSG00000123607	TTC21B
11:34056486-34056571:+	Y	N	-2.84997	7.14296e-10	2.40204e-07	-0.0237662	ENSG00000135387	CAPRIN1
1:71067207-71067513:-	Y	N	-1.91487	7.20812e-10	2.42042e-07	-0.110632	ENSG00000132485	ZRANB2
2:174893732-174909350:-	Y	Y	-1.39446	7.21846e-10	2.42042e-07	-0.00591911	ENSG00000128656	CHN1
3:37911828-37944713:+	Y	Y	-2.02628	7.25797e-10	2.42982e-07	-0.0151993	ENSG00000144677	CTDSPL
3:100386979-100400625:-	Y	Y	-1.0439	7.27792e-10	2.42982e-07	-0.00380145	ENSG00000154174	TOMM70
10:119582609-119588151:-	Y	Y	-0.975046	7.27672e-10	2.42982e-07	-0.00853822	ENSG00000151923	TIAL1
22:25565154-25604376:+	Y	Y	-1.48589	7.37391e-10	2.45833e-07	-0.0249606	ENSG00000100077	GRK3
1:241882018-241885313:+	Y	Y	-1.4543	7.38721e-10	2.45923e-07	-0.0111112	ENSG00000174371	EXO1
16:56414345-56423669:-	Y	Y	-2.22332	7.6094e-10	2.52957e-07	-0.0137306	ENSG00000159461	AMFR
17:14102243-14159876:+	Y	Y	-1.37128	7.77197e-10	2.57992e-07	-0.00456048	ENSG00000006695	COX10
21:37375118-37410569:+	Y	Y	-1.39196	7.80392e-10	2.58682e-07	-0.0214768	ENSG00000157540	DYRK1A
10:125885677-125896217:-	Y	Y	-2.21316	7.8323e-10	2.59253e-07	-0.0534528	ENSG00000089876	DHX32
14:77286823-77286982:-	Y	N	3.02482	8.0889e-10	2.67365e-07	0.221436	ENSG00000009830	POMT2
3:185922127-185923795:-	Y	N	-0.943942	8.20911e-10	2.70952e-07	-0.00924235	ENSG00000136527	TRA2B
7:77798972-77840129:+	Y	Y	-1.39322	8.27979e-10	2.72897e-07	-0.00851204	ENSG00000006576	PHTF2
18:28097255-28147672:-	Y	Y	-1.10721	8.56954e-10	2.82046e-07	-0.00720827	ENSG00000170558	CDH2
7:87181309-87181341:+	Y	N	-4.25157	8.65535e-10	2.84467e-07	-0.119671	ENSG00000135164	DMTF1
1:150293920-150294145:+	Y	N	0.816494	8.80393e-10	2.88941e-07	0.140179	ENSG00000266472	MRPS21
1:70228728-70230063:+	Y	Y	-1.08495	8.88707e-10	2.91257e-07	-0.0419352	ENSG00000116754	SRSF11
2:101870634-101871493:+	Y	Y	-1.0803	9.05157e-10	2.9623e-07	-0.0175444	ENSG00000071054	MAP4K4
1:40262984-40267390:+	Y	Y	-1.1343	9.0709e-10	2.96445e-07	-0.0073752	ENSG00000084073	ZMPSTE24
7:133602011-133630044:+	Y	Y	-1.42589	9.10433e-10	2.97119e-07	-0.00265005	ENSG00000131558	EXOC4
15:57214397-57219036:+	Y	Y	-1.95266	9.12737e-10	2.97452e-07	-0.00639517	ENSG00000140262	TCF12
7:65873566-65948670:+	Y	Y	-1.38823	9.14397e-10	2.97575e-07	-0.00756085	ENSG00000196715	VKORC1L1
4:173528079-173528209:-	Y	N	-0.680639	9.23924e-10	3.00255e-07	-0.0324891	ENSG00000164107	HAND2
1:150364920-150408905:+	Y	Y	-1.26297	9.32996e-10	3.0236e-07	-0.00753825	ENSG00000163125	RPRD2
15:78607525-78617023:-	Y	Y	-0.626469	9.33009e-10	3.0236e-07	-0.00291909	ENSG00000080644	CHRNA3
7:23319255-23342063:-	Y	Y	-0.977379	9.36015e-10	3.02911e-07	-0.00490676	ENSG00000136231	IGF2BP3
1:243695717-243734957:-	Y	Y	-1.15826	9.40769e-10	3.04026e-07	-0.00455741	ENSG00000117020	AKT3
1:246483766-246507053:-	Y	Y	-1.64427	9.77018e-10	3.15301e-07	-0.0209523	ENSG00000185420	SMYD3
3:185934429-185934505:-	Y	N	-2.04531	9.84446e-10	3.17257e-07	-0.0770743	ENSG00000136527	TRA2B
6:36981814-36984679:-	Y	Y	-1.73626	1.00001e-09	3.21826e-07	-0.0026729	ENSG00000137409	MTCH1
16:58555909-58556846:-	Y	Y	1.33531	1.01442e-09	3.26012e-07	0.0316585	ENSG00000125107	CNOT1
5:149504846-149505322:-	Y	N	-1.15172	1.01716e-09	3.26439e-07	-0.0262051	ENSG00000113712	CSNK1A1
9:112297917-112330440:-	Y	Y	-1.5839	1.04037e-09	3.33426e-07	-0.00587318	ENSG00000119314	PTBP3
9:137453821-137454390:-	Y	Y	2.06156	1.05826e-09	3.38692e-07	0.0330362	ENSG00000165802	NSMF
1:220271157-220271239:-	Y	N	-2.96992	1.0635e-09	3.399e-07	-0.200519	ENSG00000118873	RAB3GAP2
1:44230471-44232239:-	Y	Y	-1.30661	1.0698e-09	3.41443e-07	-0.00577332	ENSG00000117419	ERI3
7:66221643-66240324:+	Y	Y	-1.44016	1.07661e-09	3.43147e-07	-0.00770495	ENSG00000169902	TPST1
11:34055806-34056485:+	Y	Y	-2.37355	1.09373e-09	3.48123e-07	-0.00629502	ENSG00000135387	CAPRIN1
7:56062060-56062618:+	Y	Y	-1.43656	1.1006e-09	3.4983e-07	-0.00461581	ENSG00000146731	CCT6A
8:144792154-144792244:-	Y	N	1.03915	1.10732e-09	3.51486e-07	0.0996219	ENSG00000161016	RPL8
2:241318345-241320202:+	Y	Y	-0.897514	1.11457e-09	3.53304e-07	-0.00760402	ENSG00000168385	SEPTIN2
3:130975489-130979248:+	Y	Y	-1.0826	1.133e-09	3.58167e-07	-0.0177218	ENSG00000017260	ATP2C1
9:6500710-6504349:+	Y	Y	-1.67914	1.13161e-09	3.58167e-07	-0.0252926	ENSG00000147854	UHRF2
12:45756006-45776080:+	Y	Y	-1.1953	1.13867e-09	3.5947e-07	-0.0120317	ENSG00000189079	ARID2
4:95170333-95182896:-	Y	Y	-1.13693	1.15007e-09	3.62576e-07	-0.00947247	ENSG00000182168	UNC5C
1:171587752-171588378:+	Y	Y	-1.27796	1.17971e-09	3.71416e-07	-0.0227055	ENSG00000117523	PRRC2C
8:116658981-116689068:-	Y	Y	-0.778899	1.18992e-09	3.74121e-07	-0.0014026	ENSG00000147677	EIF3H
7:74717067-74718860:+	Y	Y	-1.02215	1.19697e-09	3.75653e-07	-0.00918044	ENSG00000263001	GTF2I
X:132735394-132758255:-	Y	Y	-1.3961	1.19803e-09	3.75653e-07	-0.00221426	ENSG00000171004	HS6ST2
3:9415733-9421478:+	Y	Y	-1.69886	1.20396e-09	3.77005e-07	-0.0198955	ENSG00000168137	SETD5
15:72203189-72204559:-	Y	N	-0.802938	1.22239e-09	3.82259e-07	-0.0018066	ENSG00000067225	PKM
1:225555084-225567248:-	Y	Y	-1.21139	1.22411e-09	3.8228e-07	-0.00165148	ENSG00000154380	ENAH
14:34575843-34581560:-	Y	Y	2.32127	1.23101e-09	3.83919e-07	0.0746293	ENSG00000129515	SNX6
1:150076313-150076915:+	Y	N	-1.3027	1.23968e-09	3.86105e-07	-0.078383	ENSG00000136631	VPS45
19:29980365-29983232:+	Y	Y	-1.94887	1.24229e-09	3.864e-07	-0.0140146	ENSG00000105176	URI1
8:25460555-25462038:+	Y	Y	-1.70064	1.2519e-09	3.88866e-07	-0.0280143	ENSG00000184661	CDCA2
2:85014054-85027888:+	Y	Y	-1.40292	1.25877e-09	3.90479e-07	-0.0070123	ENSG00000176407	KCMF1
11:46936852-46948025:+	Y	Y	-1.31934	1.26091e-09	3.90619e-07	-0.0169177	ENSG00000149179	CSTPP1
7:133484198-133551598:+	Y	Y	-1.44102	1.26392e-09	3.9103e-07	-0.00992742	ENSG00000131558	EXOC4
22:41282515-41284900:-	Y	Y	-1.25161	1.2677e-09	3.91677e-07	-0.0457026	ENSG00000100401	RANGAP1
2:191263687-191276884:+	Y	Y	-0.973685	1.27462e-09	3.93291e-07	-0.00246763	ENSG00000128641	MYO1B
1:46298371-46299890:-	Y	N	-1.28464	1.2951e-09	3.99081e-07	-0.039503	ENSG00000132128	LRRC41
18:43274395-43277239:-	Y	Y	-0.963455	1.31156e-09	4.03617e-07	-0.00748945	ENSG00000132872	SYT4
7:90790653-90824604:+	Y	Y	-1.48673	1.31992e-09	4.05652e-07	-0.00718876	ENSG00000058091	CDK14
1:225515398-225517195:-	Y	Y	-1.3331	1.33012e-09	4.08244e-07	-0.0128061	ENSG00000154380	ENAH
1:90982371-91020447:-	Y	Y	-1.37254	1.33696e-09	4.09802e-07	-0.0147604	ENSG00000122482	ZNF644
18:55404436-55422153:-	Y	Y	-1.08776	1.36053e-09	4.16477e-07	-0.0041107	ENSG00000196628	TCF4
6:50828680-50836060:+	Y	Y	-1.0223	1.36326e-09	4.16764e-07	-0.0138018	ENSG00000008196	TFAP2B
22:29289063-29290412:+	Y	N	-1.00986	1.38894e-09	4.24054e-07	-0.0438868	ENSG00000182944	EWSR1
7:117076652-117090748:+	Y	Y	-1.29352	1.39292e-09	4.24709e-07	-0.00739603	ENSG00000004866	ST7
4:24576679-24580719:-	Y	Y	-1.14363	1.39989e-09	4.25769e-07	-0.00765468	ENSG00000109606	DHX15
7:143384246-143387761:+	Y	Y	-1.8523	1.40006e-09	4.25769e-07	-0.0106004	ENSG00000159840	ZYX
3:44341426-44354738:+	Y	Y	-1.46803	1.4208e-09	4.31511e-07	-0.0237918	ENSG00000179152	TCAIM
10:7756143-7759889:-	Y	Y	2.91885	1.43334e-09	4.34749e-07	0.219215	ENSG00000151657	KIN
9:112234898-112250928:-	Y	Y	-1.3353	1.46749e-09	4.44527e-07	-0.00499706	ENSG00000119314	PTBP3
5:139600436-139614257:+	Y	Y	-0.859869	1.4749e-09	4.46189e-07	-0.00234865	ENSG00000131508	UBE2D2
1:167251988-167257819:+	Y	Y	-1.61872	1.52786e-09	4.60681e-07	-0.0267123	ENSG00000143190	POU2F1
19:1372099-1373071:+	Y	N	-1.61016	1.52689e-09	4.60681e-07	-0.0924833	ENSG00000160953	PWWP3A
20:37184374-37198396:+	Y	Y	-0.828327	1.52876e-09	4.60681e-07	-0.00143186	ENSG00000118705	RPN2
13:44474302-44538325:-	Y	Y	-1.4493	1.53243e-09	4.61189e-07	-0.011578	ENSG00000102804	TSC22D1
1:1262391-1262852:-	Y	Y	-1.55339	1.53455e-09	4.61229e-07	-0.0250273	ENSG00000160087	UBE2J2
9:83976508-83976994:-	Y	N	-1.09361	1.5542e-09	4.66531e-07	-0.00904205	ENSG00000165119	HNRNPK
12:78926721-78955461:+	Y	Y	-1.56544	1.57692e-09	4.72736e-07	-0.00859586	ENSG00000067715	SYT1
9:35162306-35227797:+	Y	Y	-1.54849	1.58952e-09	4.75902e-07	-0.00459507	ENSG00000198722	UNC13B
7:16674589-16681300:+	Y	Y	-1.14635	1.593e-09	4.76329e-07	-0.00357115	ENSG00000136261	BZW2
5:107506192-107670488:-	Y	Y	-1.64446	1.60703e-09	4.79906e-07	-0.0245855	ENSG00000184349	EFNA5
7:80203833-80210111:+	Y	Y	-1.50332	1.61397e-09	4.81356e-07	-0.00577885	ENSG00000127955	GNAI1
8:61503510-61517012:-	Y	Y	2.47546	1.64841e-09	4.90997e-07	0.095535	ENSG00000198363	ASPH
10:119588358-119591975:-	Y	Y	-1.38335	1.65316e-09	4.9178e-07	-0.00952615	ENSG00000151923	TIAL1
1:244854749-244854972:-	Y	N	-1.09581	1.65535e-09	4.91802e-07	-0.0205375	ENSG00000153187	HNRNPU
1:220096227-220100489:+	Y	Y	-1.48612	1.66867e-09	4.95125e-07	-0.00237991	ENSG00000067704	IARS2
18:55519025-55535558:-	Y	Y	-1.28617	1.67834e-09	4.97359e-07	-0.0106866	ENSG00000196628	TCF4
6:34646799-34654624:-	Y	Y	-1.24984	1.6812e-09	4.97571e-07	-0.00600629	ENSG00000196821	ILRUN
1:180430263-180492268:-	Y	Y	-1.04711	1.6881e-09	4.98978e-07	-0.00298196	ENSG00000230124	ACBD6
3:149822574-149846010:+	Y	Y	-1.49341	1.69521e-09	5.00439e-07	-0.0130961	ENSG00000082996	RNF13
1:243140364-243142285:-	Y	Y	-1.36296	1.70031e-09	5.01309e-07	-0.0223188	ENSG00000143702	CEP170
9:125696405-125706970:-	Y	Y	-1.29248	1.71435e-09	5.04806e-07	-0.0100719	ENSG00000119487	MAPKAP1
13:35845900-35849922:-	Y	N	-1.92723	1.72452e-09	5.07158e-07	-0.227819	ENSG00000133083	DCLK1
1:176176008-176184632:-	Y	Y	-1.36455	1.72797e-09	5.0753e-07	-0.0140031	ENSG00000143207	COP1
7:123689151-123692346:-	Y	Y	-1.10315	1.7343e-09	5.08744e-07	-0.0103592	ENSG00000106299	WASL
10:5709626-5709663:+	Y	N	2.60619	1.74394e-09	5.10926e-07	0.403957	ENSG00000108021	TASOR2
21:39345275-39345829:-	Y	N	-1.27971	1.7697e-09	5.17819e-07	-0.0266499	ENSG00000205581	HMGN1
6:38143205-38152234:+	Y	Y	-1.15016	1.78157e-09	5.20636e-07	-0.0095429	ENSG00000156639	ZFAND3
10:5685176-5692815:+	Y	Y	-1.18415	1.80124e-09	5.25722e-07	-0.0158344	ENSG00000108021	TASOR2
4:105449404-105453597:-	Y	Y	-1.60332	1.80778e-09	5.26968e-07	-0.00951914	ENSG00000138777	PPA2
10:21682258-21688490:+	Y	Y	-1.35208	1.81439e-09	5.28231e-07	-0.0311093	ENSG00000078403	MLLT10
12:2861299-2861378:-	Y	N	1.63487	1.83867e-09	5.3463e-07	0.215373	ENSG00000111206	FOXM1
14:77304801-77305744:-	Y	N	1.56324	1.86218e-09	5.40787e-07	0.0877102	ENSG00000009830	POMT2
13:35168996-35171271:+	Y	Y	-2.64906	1.88326e-09	5.46226e-07	-0.03196	ENSG00000172915	NBEA
11:124783291-124799870:-	Y	Y	-1.39035	1.88966e-09	5.47399e-07	-0.0705251	ENSG00000120458	MSANTD2
1:164831484-164846583:+	Y	Y	-1.81756	1.89843e-09	5.49149e-07	-0.00516019	ENSG00000185630	PBX1
16:89560713-89560839:+	Y	N	0.640862	1.90044e-09	5.49149e-07	0.0167003	ENSG00000167526	RPL13
2:209580101-209625052:+	Y	Y	-1.18724	1.90959e-09	5.51106e-07	-0.00334759	ENSG00000078018	MAP2
1:151762617-151762949:-	Y	N	1.48697	1.95657e-09	5.63963e-07	0.107647	ENSG00000143436	MRPL9
8:71354910-71356461:-	Y	Y	-1.13606	1.96247e-09	5.64963e-07	-0.0341604	ENSG00000104313	EYA1
2:174918534-174918565:-	Y	N	-2.43389	1.96681e-09	5.65509e-07	-0.0832004	ENSG00000128656	CHN1
19:46728127-46728299:-	Y	N	2.6011	1.99956e-09	5.74216e-07	0.0464293	ENSG00000090372	STRN4
14:60288556-60289805:+	Y	Y	-2.22574	2.00457e-09	5.74942e-07	-0.0304342	ENSG00000100614	PPM1A
1:71065753-71066775:-	Y	N	-1.3698	2.00829e-09	5.75298e-07	-0.140801	ENSG00000132485	ZRANB2
12:42351960-42352049:+	Y	N	1.60173	2.06489e-09	5.90054e-07	0.215846	ENSG00000134283	PPHLN1
20:50904850-50905558:-	Y	N	-1.58232	2.06357e-09	5.90054e-07	-0.0574779	ENSG00000101126	ADNP
1:100896672-100906851:+	Y	Y	-1.24324	2.07434e-09	5.92026e-07	-0.0186729	ENSG00000162695	SLC30A7
10:5800706-5811873:-	Y	Y	-0.901036	2.07786e-09	5.92302e-07	-0.00568132	ENSG00000057608	GDI2
4:5856308-5861025:-	Y	Y	-1.37809	2.09957e-09	5.97756e-07	-0.00584976	ENSG00000072832	CRMP1
18:55261090-55261465:-	Y	N	-1.75938	2.11732e-09	6.0207e-07	-0.0135318	ENSG00000196628	TCF4
1:220232864-220265984:-	Y	Y	-1.45175	2.13762e-09	6.07101e-07	-0.0137488	ENSG00000118873	RAB3GAP2
13:24475597-24477700:-	Y	Y	-2.12708	2.15419e-09	6.11058e-07	-0.0110113	ENSG00000102699	PARP4
13:46553704-46650200:+	Y	Y	-1.4258	2.15892e-09	6.11651e-07	-0.0217645	ENSG00000136141	LRCH1
14:23566687-23566808:-	Y	Y	-2.08791	2.17419e-09	6.15226e-07	-0.286605	ENSG00000213983	AP1G2
2:174909447-174915057:-	Y	Y	-1.5062	2.23107e-09	6.30554e-07	-0.00924125	ENSG00000128656	CHN1
11:93732502-93732799:-	Y	N	-1.26557	2.23457e-09	6.30775e-07	-0.14099	ENSG00000166012	TAF1D
8:73292882-73292922:-	Y	N	2.01031	2.24257e-09	6.32263e-07	0.20419	ENSG00000147604	RPL7
1:169921782-169954010:-	Y	Y	-1.51994	2.27284e-09	6.39245e-07	-0.0118408	ENSG00000075945	KIFAP3
10:73376218-73377444:-	Y	Y	-2.00883	2.27019e-09	6.39245e-07	-0.0163405	ENSG00000138279	ANXA7
1:44323044-44339044:-	Y	Y	-0.988118	2.29092e-09	6.42998e-07	-0.00486964	ENSG00000117419	ERI3
20:35707940-35707988:-	Y	N	-2.34532	2.29173e-09	6.42998e-07	-0.109706	ENSG00000131051	RBM39
6:143190598-143284109:+	Y	Y	-1.27726	2.30671e-09	6.46419e-07	-0.00291301	ENSG00000146416	AIG1
17:82472699-82478570:+	Y	Y	-1.03949	2.33097e-09	6.5243e-07	-0.00358608	ENSG00000141562	NARF
1:156013041-156014960:-	Y	N	-0.946813	2.36167e-09	6.60226e-07	-0.00282854	ENSG00000163479	SSR2
2:20263461-20278582:-	Y	Y	-1.07678	2.40473e-09	6.7145e-07	-0.0158735	ENSG00000055917	PUM2
8:67061292-67061343:-	Y	N	2.14845	2.40761e-09	6.7145e-07	0.256813	ENSG00000121022	COPS5
16:28590631-28590637:+	Y	N	-13.834	2.46976e-09	6.87958e-07	-0.139878	ENSG00000176476	SGF29
9:14093465-14094217:-	Y	Y	-1.46309	2.47805e-09	6.89437e-07	-0.0391983	ENSG00000147862	NFIB
8:130137039-130152604:-	Y	Y	-1.04145	2.48181e-09	6.89658e-07	-0.00431494	ENSG00000153317	ASAP1
1:183261304-183278552:-	Y	Y	-1.78425	2.49183e-09	6.91565e-07	-0.0124214	ENSG00000157064	NMNAT2
6:87169674-87170364:+	Y	N	-2.4094	2.49463e-09	6.91565e-07	-0.0545073	ENSG00000188994	ZNF292
7:108328656-108399435:-	Y	Y	-1.45555	2.50056e-09	6.92382e-07	-0.00554449	ENSG00000091129	NRCAM
21:26000183-26009595:-	Y	Y	-0.980068	2.53575e-09	7.01288e-07	-0.00132522	ENSG00000142192	APP
15:37083886-37093580:-	Y	Y	-0.880215	2.56401e-09	7.08259e-07	-0.0123174	ENSG00000134138	MEIS2
15:85693452-85708018:+	Y	Y	-1.83553	2.57275e-09	7.09829e-07	-0.0370984	ENSG00000170776	AKAP13
1:98956742-98990855:-	Y	Y	-1.67371	2.64122e-09	7.27855e-07	-0.00443819	ENSG00000117598	PLPPR5
1:86868103-86880661:-	Y	Y	-1.18752	2.69526e-09	7.40986e-07	-0.0027021	ENSG00000183291	SELENOF
15:72204560-72206258:-	Y	Y	-0.929107	2.69422e-09	7.40986e-07	-0.00197297	ENSG00000067225	PKM
3:77527415-77546337:+	Y	Y	-1.61746	2.71186e-09	7.44668e-07	-0.0164586	ENSG00000185008	ROBO2
2:235750489-235797758:+	Y	Y	-1.09409	2.78255e-09	7.63174e-07	-0.00324375	ENSG00000157985	AGAP1
12:130414711-130422452:-	Y	Y	-1.64011	2.79993e-09	7.67036e-07	-0.125806	ENSG00000060709	RIMBP2
1:63775415-64009304:+	Y	Y	-3.99068	2.827e-09	7.73538e-07	-0.400167	ENSG00000185483	ROR1
20:36499242-36499317:+	Y	N	1.74432	2.85275e-09	7.79663e-07	0.20513	ENSG00000080845	DLGAP4
3:168048366-168095098:-	Y	Y	-1.37486	2.86374e-09	7.81747e-07	-0.00872488	ENSG00000173905	GOLIM4
1:113391350-113403654:+	Y	Y	-1.91354	2.9074e-09	7.92734e-07	-0.0666198	ENSG00000081026	MAGI3
17:62608149-62611945:+	Y	Y	-1.25327	2.92626e-09	7.9694e-07	-0.0178422	ENSG00000146872	TLK2
8:96494336-96529192:+	Y	Y	-1.46374	2.94415e-09	8.00607e-07	-0.00482539	ENSG00000169439	SDC2
10:22322171-22325188:+	Y	Y	-1.27883	2.94663e-09	8.00607e-07	-0.0321216	ENSG00000168283	BMI1
4:1887691-1892165:+	Y	Y	-1.25559	2.95035e-09	8.0068e-07	-0.0226815	ENSG00000109685	NSD2
17:59001742-59012327:-	Y	Y	-1.27712	3.01553e-09	8.17413e-07	-0.00786194	ENSG00000108395	TRIM37
6:159727704-159736257:+	Y	Y	-1.40968	3.05913e-09	8.28264e-07	-0.0279499	ENSG00000146457	WTAP
15:57219037-57219429:+	Y	N	-2.14961	3.08363e-09	8.33923e-07	-0.0257011	ENSG00000140262	TCF12
17:16172021-16186553:-	Y	Y	-1.21563	3.09031e-09	8.34758e-07	-0.0068414	ENSG00000141027	NCOR1
11:18396969-18397398:+	Y	N	-0.972078	3.13089e-09	8.44737e-07	-0.00741724	ENSG00000134333	LDHA
1:183502392-183512836:+	Y	Y	-1.11925	3.20723e-09	8.63325e-07	-0.005591	ENSG00000116698	SMG7
1:176135087-176136487:-	Y	Y	-2.22246	3.20635e-09	8.63325e-07	-0.029621	ENSG00000143207	COP1
22:29290830-29291019:+	Y	N	-1.26874	3.22121e-09	8.66084e-07	-0.0797025	ENSG00000182944	EWSR1
11:10799362-10799414:-	Y	N	1.7409	3.23927e-09	8.6993e-07	0.00967638	ENSG00000110321	EIF4G2
17:7315120-7315120:-	Y	N	1.69825	3.27364e-09	8.78145e-07	0.274571	ENSG00000132522	GPS2
8:22612703-22613016:+	Y	N	-1.57768	3.28083e-09	8.78569e-07	-0.024968	ENSG00000158941	CCAR2
18:36033838-36040806:-	Y	Y	-1.18529	3.28279e-09	8.78569e-07	-0.00746789	ENSG00000141425	RPRD1A
17:49647123-49668026:-	Y	Y	-1.20842	3.31702e-09	8.86008e-07	-0.00520417	ENSG00000121067	SPOP
18:27990351-27992654:-	Y	Y	-1.91339	3.32204e-09	8.86008e-07	-0.0086002	ENSG00000170558	CDH2
18:79985867-79986601:-	Y	Y	-1.35574	3.32091e-09	8.86008e-07	-0.0176149	ENSG00000141759	TXNL4A
6:1960967-2043335:-	Y	Y	-2.18393	3.35795e-09	8.9353e-07	-0.00569079	ENSG00000112699	GMDS
17:44438716-44445754:-	Y	Y	-1.49411	3.35652e-09	8.9353e-07	-0.0453825	ENSG00000186566	GPATCH8
14:58258455-58260947:+	Y	Y	-1.35357	3.37327e-09	8.96579e-07	-0.00619997	ENSG00000100567	PSMA3
7:82349650-82443364:-	Y	Y	-1.1616	3.39441e-09	9.01166e-07	-0.0129185	ENSG00000153956	CACNA2D1
1:167274525-167303473:+	Y	Y	-1.39822	3.42929e-09	9.09384e-07	-0.0145521	ENSG00000143190	POU2F1
6:56785880-56843054:-	Y	Y	-1.40582	3.46562e-09	9.1797e-07	-0.016002	ENSG00000151914	DST
7:1495554-1496155:-	Y	Y	1.08681	3.47411e-09	9.19171e-07	0.0457796	ENSG00000164880	INTS1
7:158749724-158752780:-	Y	Y	-1.57107	3.49363e-09	9.23283e-07	-0.0148868	ENSG00000117868	ESYT2
X:132708495-132735083:-	Y	Y	-0.997658	3.51912e-09	9.28959e-07	-0.0015201	ENSG00000171004	HS6ST2
17:40637732-40639980:-	Y	Y	-0.986918	3.55739e-09	9.37994e-07	-0.00811443	ENSG00000073584	SMARCE1
2:42187328-42207928:+	Y	Y	-1.02874	3.5678e-09	9.39672e-07	-0.00713239	ENSG00000143924	EML4
13:26255206-26299608:+	Y	Y	-1.62104	3.6099e-09	9.49683e-07	-0.0134494	ENSG00000132964	CDK8
17:66554580-66641354:+	Y	Y	-1.34688	3.61898e-09	9.50993e-07	-0.00283166	ENSG00000154229	PRKCA
15:82540133-82540142:-	Y	N	0.87738	3.64186e-09	9.55922e-07	0.101637	ENSG00000182774	RPS17
17:18195036-18206560:+	Y	Y	-0.919662	3.6753e-09	9.63611e-07	-0.00331032	ENSG00000091542	ALKBH5
14:71009869-71011491:+	Y	Y	-2.93526	3.69029e-09	9.66448e-07	-0.0360339	ENSG00000100731	PCNX1
4:52920871-53145332:-	Y	Y	-1.47079	3.69522e-09	9.66647e-07	-0.00870153	ENSG00000184178	SCFD2
20:49092128-49094139:+	Y	Y	1.18261	3.71331e-09	9.70288e-07	0.00920865	ENSG00000124207	CSE1L
16:1963257-1963652:-	Y	Y	-1.14005	3.80994e-09	9.94415e-07	-0.0422824	ENSG00000140988	RPS2
17:63319091-63340100:+	Y	Y	-1.68504	3.82575e-09	9.97419e-07	-0.0146804	ENSG00000170921	TANC2
4:103139789-103140079:-	Y	N	4.33931	3.85921e-09	1.00502e-06	0.565993	ENSG00000138778	CENPE
2:188294394-188300107:+	Y	Y	-1.66445	3.89936e-09	1.01433e-06	-0.0202283	ENSG00000144366	GULP1
1:227068702-227069776:-	Y	N	-2.14867	3.93311e-09	1.02197e-06	-0.0205681	ENSG00000143776	CDC42BPA
4:168916028-168921533:+	Y	Y	-1.06085	3.95321e-09	1.02604e-06	-0.00739443	ENSG00000129116	PALLD
8:29018914-29042638:+	Y	Y	-1.15029	3.98025e-09	1.03075e-06	-0.00861915	ENSG00000147421	HMBOX1
16:47086340-47100947:-	Y	Y	-1.16665	3.97843e-09	1.03075e-06	-0.00770679	ENSG00000171208	NETO2
1:180492366-180495460:-	Y	Y	-1.48875	4.00161e-09	1.03513e-06	-0.0176131	ENSG00000230124	ACBD6
20:33562675-33573973:+	Y	Y	-1.22132	4.01925e-09	1.03853e-06	-0.0181278	ENSG00000078699	CBFA2T2
1:213998263-214005164:+	Y	Y	-1.229	4.06591e-09	1.04942e-06	-0.0646503	ENSG00000117707	PROX1
14:24177409-24177464:+	Y	N	1.42492	4.08765e-09	1.05386e-06	0.15594	ENSG00000100918	REC8
3:18386612-18394461:-	Y	Y	-1.37571	4.09869e-09	1.05553e-06	-0.0132683	ENSG00000182568	SATB1
12:84892309-84908937:-	Y	Y	-1.24016	4.12697e-09	1.06164e-06	-0.0045733	ENSG00000072041	SLC6A15
4:39458441-39458441:-	Y	N	1.9304	4.14485e-09	1.06463e-06	0.193786	ENSG00000163682	RPL9
14:94062622-94078965:-	Y	Y	-0.960402	4.15238e-09	1.06463e-06	-0.00175168	ENSG00000089737	DDX24
15:99566600-99598429:+	Y	Y	-1.69385	4.14876e-09	1.06463e-06	-0.0261875	ENSG00000068305	MEF2A
5:93587244-93587459:+	Y	Y	-2.2103	4.18702e-09	1.072e-06	-0.0571758	ENSG00000175745	NR2F1
10:78038556-78040200:+	Y	N	0.980831	4.19497e-09	1.072e-06	0.0192337	ENSG00000138326	RPS24
18:55535638-55546821:-	Y	Y	-1.60542	4.19434e-09	1.072e-06	-0.0138728	ENSG00000196628	TCF4
1:93120895-93127231:+	Y	Y	-1.17406	4.21198e-09	1.07516e-06	-0.0279534	ENSG00000143033	MTF2
11:78280902-78318142:-	Y	Y	-1.45891	4.28342e-09	1.0922e-06	-0.00732755	ENSG00000033327	GAB2
9:3248186-3256990:-	Y	Y	-1.38946	4.31071e-09	1.09795e-06	-0.016259	ENSG00000080298	RFX3
6:30558437-30560030:+	Y	Y	-1.50239	4.34232e-09	1.10479e-06	-0.034585	ENSG00000204576	PRR3
19:33411801-33413551:-	Y	Y	-4.72869	4.34741e-09	1.10487e-06	-0.0037493	ENSG00000124299	PEPD
11:34063364-34071725:+	Y	Y	-0.963747	4.37582e-09	1.11087e-06	-0.00196488	ENSG00000135387	CAPRIN1
3:12836224-12839050:-	Y	Y	-1.09008	4.41362e-09	1.11802e-06	-0.000882974	ENSG00000144713	RPL32
7:116888700-116892993:+	Y	Y	-1.63164	4.41248e-09	1.11802e-06	-0.00505834	ENSG00000198898	CAPZA2
10:119859885-119872526:-	Y	Y	-1.03761	4.433e-09	1.12171e-06	-0.00547617	ENSG00000197771	MCMBP
7:129041718-129054650:-	Y	Y	-0.873694	4.44286e-09	1.12298e-06	-0.00629194	ENSG00000064419	TNPO3
22:29512137-29517028:-	Y	Y	-0.94643	4.56087e-09	1.15155e-06	-0.00475853	ENSG00000100296	THOC5
1:164700712-164772911:+	Y	Y	-1.3675	4.62209e-09	1.16498e-06	-0.00800236	ENSG00000185630	PBX1
5:146482728-146483539:+	Y	Y	-1.77992	4.62408e-09	1.16498e-06	-0.0824514	ENSG00000113649	TCERG1
13:98521999-98575994:-	Y	Y	-1.13872	4.6427e-09	1.1684e-06	-0.00626718	ENSG00000102572	STK24
1:45917534-45959385:+	Y	Y	-1.4594	4.76002e-09	1.19663e-06	-0.0069275	ENSG00000086015	MAST2
2:171117858-171153850:-	Y	Y	-1.30784	4.78674e-09	1.20204e-06	-0.00580174	ENSG00000198586	TLK1
9:127509132-127509887:-	Y	Y	2.27701	4.82825e-09	1.21115e-06	0.0818165	ENSG00000136830	NIBAN2
8:11295303-11297899:+	Y	Y	-2.01507	4.89141e-09	1.22567e-06	-0.0545404	ENSG00000104643	MTMR9
5:113204577-113234436:-	Y	Y	-1.75076	4.91633e-09	1.22926e-06	-0.0254868	ENSG00000171444	MCC
21:46652953-46656822:+	Y	Y	-1.05788	4.91594e-09	1.22926e-06	-0.0378902	ENSG00000160310	PRMT2
1:42191720-42194889:-	Y	Y	-1.57596	4.93042e-09	1.23146e-06	-0.0171525	ENSG00000198815	FOXJ3
17:76735618-76735661:-	Y	N	-1.12649	4.97855e-09	1.24214e-06	-0.10088	ENSG00000161547	SRSF2
2:175178403-175179056:-	Y	N	-1.11587	4.98394e-09	1.24215e-06	-0.0106824	ENSG00000154518	ATP5MC3
6:147334223-147339178:+	Y	Y	-1.99061	5.06508e-09	1.26102e-06	-0.0340743	ENSG00000164506	STXBP5
5:102990402-103003032:+	Y	Y	-1.58156	5.14639e-09	1.27989e-06	-0.00399437	ENSG00000145730	PAM
11:46512814-46530582:-	Y	Y	-1.55259	5.16179e-09	1.28234e-06	-0.00970824	ENSG00000110497	AMBRA1
15:83164076-83169221:-	Y	Y	-1.3825	5.23216e-09	1.29844e-06	-0.00530536	ENSG00000166503	HDGFL3
X:115188371-115233692:-	Y	Y	-2.16989	5.25576e-09	1.3029e-06	-0.0192465	ENSG00000130224	LRCH2
5:124638824-124639132:-	N	N	-1.75354	5.28889e-09	1.30415e-06	-0.137169	ENSG00000168916	ZNF608
6:154733931-154741955:+	Y	Y	-1.09468	5.27496e-09	1.30415e-06	-0.0202355	ENSG00000213079	SCAF8
9:79576803-79580059:+	Y	Y	-1.28419	5.2858e-09	1.30415e-06	-0.0177274	ENSG00000106829	TLE4
9:120659576-120713757:-	Y	Y	-1.70167	5.27757e-09	1.30415e-06	-0.0102097	ENSG00000106780	MEGF9
11:93732800-93732976:-	Y	N	-1.33178	5.27959e-09	1.30415e-06	-0.144446	ENSG00000166012	TAF1D
10:74243034-74314666:+	Y	Y	-1.20266	5.35723e-09	1.3196e-06	-0.002288	ENSG00000156110	ADK
7:10974946-10982371:+	Y	Y	-1.28207	5.44584e-09	1.34e-06	-0.00827706	ENSG00000106443	PHF14
17:64503099-64503187:-	Y	N	1.61743	5.4533e-09	1.34041e-06	0.0463554	ENSG00000108654	DDX5
5:107427510-107506135:-	Y	Y	-1.66182	5.48393e-09	1.34652e-06	-0.0103482	ENSG00000184349	EFNA5
18:55261534-55264595:-	Y	Y	-0.735606	5.49574e-09	1.34799e-06	-0.00829879	ENSG00000196628	TCF4
1:246335475-246355030:-	Y	Y	-1.67313	5.50215e-09	1.34814e-06	-0.00355538	ENSG00000185420	SMYD3
9:97562822-97564037:+	Y	Y	-1.25003	5.53777e-09	1.35543e-06	-0.0162154	ENSG00000136842	TMOD1
6:111363979-111364943:-	Y	Y	-3.69769	5.55209e-09	1.35751e-06	-0.037672	ENSG00000009413	REV3L
17:50388133-50392397:-	Y	Y	-0.812803	5.59467e-09	1.36648e-06	-0.00375495	ENSG00000108829	LRRC59
11:28088722-28090616:-	Y	Y	-1.6277	5.60772e-09	1.36822e-06	-0.0435658	ENSG00000121621	KIF18A
7:106099283-106111831:-	Y	Y	-1.08049	5.62751e-09	1.3715e-06	-0.0043783	ENSG00000008282	SYPL1
11:14699354-14700653:+	Y	Y	-3.19019	5.63298e-09	1.3715e-06	-0.0327834	ENSG00000152270	PDE3B
7:123696748-123704633:-	Y	Y	-1.05723	5.68225e-09	1.38205e-06	-0.00679486	ENSG00000106299	WASL
2:209424277-209507591:+	Y	Y	-2.04948	5.68962e-09	1.38239e-06	-0.021494	ENSG00000078018	MAP2
9:122898111-122905109:-	Y	Y	-1.40646	5.72525e-09	1.38959e-06	-0.0200161	ENSG00000056586	RC3H2
1:24653033-24654305:+	Y	Y	-1.96177	5.7716e-09	1.39938e-06	-0.0102988	ENSG00000133226	SRRM1
17:4335325-4345627:-	Y	Y	-1.38223	5.80198e-09	1.40528e-06	-0.00494919	ENSG00000132388	UBE2G1
20:35021357-35035122:-	Y	Y	-1.14416	5.97484e-09	1.44564e-06	-0.00975163	ENSG00000100991	TRPC4AP
11:115445837-115504270:-	Y	Y	-1.09194	6.0406e-09	1.46003e-06	-0.00709706	ENSG00000182985	CADM1
17:47072560-47081919:-	Y	Y	-1.76257	6.09284e-09	1.47112e-06	-0.0577261	ENSG00000262879	NA
14:100884875-100893443:-	Y	Y	-0.72577	6.1026e-09	1.47194e-06	-0.00178121	ENSG00000254656	RTL1
1:169108164-169110409:+	Y	Y	-0.795046	6.11509e-09	1.47342e-06	-0.00458082	ENSG00000143153	ATP1B1
17:49668079-49675894:-	Y	Y	-1.1766	6.15263e-09	1.48093e-06	-0.00680398	ENSG00000121067	SPOP
1:243808235-243814498:-	Y	Y	-1.26255	6.17859e-09	1.48564e-06	-0.00861098	ENSG00000117020	AKT3
1:10211739-10230763:+	Y	Y	-1.69673	6.23928e-09	1.49868e-06	-0.0234444	ENSG00000054523	KIF1B
21:25945976-25954589:-	Y	Y	-0.911515	6.24599e-09	1.49874e-06	-0.00145177	ENSG00000142192	APP
2:188587950-188588650:+	Y	N	-1.68949	6.28685e-09	1.5059e-06	-0.0962248	ENSG00000144366	GULP1
8:73292923-73293150:-	Y	Y	2.13443	6.28882e-09	1.5059e-06	0.168829	ENSG00000147604	RPL7
8:102361627-102412172:-	Y	Y	-1.16533	6.31301e-09	1.50912e-06	-0.017213	ENSG00000104517	UBR5
13:35855862-35871223:-	Y	Y	-1.81741	6.31526e-09	1.50912e-06	-0.00832061	ENSG00000133083	DCLK1
2:241685878-241686653:-	Y	Y	-1.54426	6.40172e-09	1.52821e-06	-0.0252473	ENSG00000168393	DTYMK
9:4703209-4706010:+	Y	Y	3.51362	6.43188e-09	1.53383e-06	0.428327	ENSG00000106993	CDC37L1
13:79344795-79353152:-	Y	Y	-1.1431	6.46237e-09	1.53952e-06	-0.0212372	ENSG00000139746	RBM26
14:21265517-21268622:-	Y	Y	-0.854558	6.52059e-09	1.55179e-06	-0.00669384	ENSG00000092199	HNRNPC
5:72825822-72848120:+	Y	Y	-1.05235	6.56635e-09	1.56108e-06	-0.00980234	ENSG00000083312	TNPO1
2:53923049-53923118:-	Y	N	-5.49448	6.59792e-09	1.56698e-06	-0.0540584	ENSG00000068878	PSME4
1:246193728-246305918:-	Y	Y	-1.30626	6.60786e-09	1.56774e-06	-0.0151062	ENSG00000185420	SMYD3
1:35967076-35972023:+	Y	Y	-1.3652	6.65333e-09	1.57691e-06	-0.0426455	ENSG00000126070	AGO3
2:159065972-159097636:+	Y	Y	-1.33933	6.68948e-09	1.58386e-06	-0.00944955	ENSG00000115183	TANC1
2:229860532-229879981:-	Y	Y	-1.06319	6.71759e-09	1.5889e-06	-0.00402146	ENSG00000153827	TRIP12
10:5692919-5699447:+	Y	Y	-1.4368	6.72809e-09	1.58976e-06	-0.024142	ENSG00000108021	TASOR2
13:112527485-112544555:-	Y	Y	-1.19652	6.78328e-09	1.60117e-06	-0.0183185	ENSG00000126216	TUBGCP3
10:59206845-59234303:+	Y	Y	-1.51002	6.82171e-09	1.60861e-06	-0.00587749	ENSG00000165443	PHYHIPL
22:46350464-46351649:+	Y	Y	1.57775	6.83303e-09	1.60964e-06	0.184984	ENSG00000100416	TRMU
4:82829414-82830936:-	Y	Y	-1.58524	6.8602e-09	1.6144e-06	-0.0205907	ENSG00000138674	SEC31A
4:140949373-140967622:-	Y	Y	-1.09745	6.87236e-09	1.61562e-06	-0.00658008	ENSG00000170153	RNF150
1:64781572-64789387:+	Y	Y	-1.74412	6.92125e-09	1.62547e-06	-0.00567988	ENSG00000162437	RAVER2
9:125749538-125750473:+	Y	Y	-1.53904	6.93409e-09	1.62684e-06	-0.071809	ENSG00000167081	PBX3
13:36867384-36872657:-	Y	Y	-1.4528	6.94665e-09	1.62814e-06	-0.00999482	ENSG00000120693	SMAD9
6:36029161-36052698:+	Y	Y	-1.3835	6.97628e-09	1.63343e-06	-0.00727653	ENSG00000112062	MAPK14
8:129880459-129894486:-	Y	Y	-1.10587	7.00181e-09	1.63776e-06	-0.00537875	ENSG00000153310	CYRIB
7:127652452-127679044:+	Y	Y	-1.09599	7.02548e-09	1.64164e-06	-0.0029323	ENSG00000197157	SND1
4:76184781-76191849:-	Y	Y	-0.957215	7.03398e-09	1.64197e-06	-0.00332647	ENSG00000138760	SCARB2
19:47153041-47155113:+	Y	Y	1.31046	7.04749e-09	1.64347e-06	0.00539872	ENSG00000142230	SAE1
12:50016940-50017084:-	Y	N	-2.65485	7.13094e-09	1.66127e-06	-0.0361715	ENSG00000161800	RACGAP1
3:177027831-177032317:-	Y	Y	-1.19681	7.18226e-09	1.67154e-06	-0.0153258	ENSG00000177565	TBL1XR1
2:180990047-181057690:+	Y	Y	-1.21419	7.19207e-09	1.67215e-06	-0.00523335	ENSG00000170035	UBE2E3
1:185301715-185305514:-	Y	Y	-1.13905	7.22672e-09	1.67685e-06	-0.0489278	ENSG00000116679	IVNS1ABP
2:20801466-20823036:-	Y	Y	-1.22772	7.22151e-09	1.67685e-06	-0.00521021	ENSG00000118961	LDAH
1:163147504-163152472:-	Y	Y	-0.35704	7.29731e-09	1.69153e-06	-0.00119504	ENSG00000143248	RGS5
9:107311738-107318751:+	Y	Y	-0.93666	7.38881e-09	1.71103e-06	-0.00177429	ENSG00000119318	RAD23B
3:12071558-12071683:+	Y	N	-3.5112	7.40488e-09	1.71305e-06	-0.207152	ENSG00000157152	SYN2
1:155721990-155725381:+	Y	Y	-1.05746	7.57622e-09	1.75094e-06	-0.00735264	ENSG00000132676	DAP3
10:35337208-35394815:+	Y	Y	-1.24501	7.62304e-09	1.76e-06	-0.013407	ENSG00000108100	CCNY
1:169992256-170016461:-	Y	Y	-1.30349	7.70308e-09	1.77672e-06	-0.00632803	ENSG00000075945	KIFAP3
10:87079884-87089561:-	Y	Y	-1.24754	7.74438e-09	1.7827e-06	-0.00838815	ENSG00000148672	GLUD1
10:106956584-107163968:-	Y	Y	-1.2515	7.73674e-09	1.7827e-06	-0.00917043	ENSG00000108018	SORCS1
6:28914776-28915290:-	Y	N	-1.35603	7.80084e-09	1.79392e-06	-0.0316364	ENSG00000204713	TRIM27
3:177032341-177032551:-	Y	Y	-1.82765	7.81196e-09	1.79469e-06	-0.06262	ENSG00000177565	TBL1XR1
6:110160733-110177146:-	Y	Y	-1.27927	7.83577e-09	1.79483e-06	-0.00735706	ENSG00000112290	WASF1
14:69442267-69453240:+	Y	Y	-1.12021	7.82196e-09	1.79483e-06	-0.00496948	ENSG00000029364	SLC39A9
17:42834877-42837648:+	Y	Y	-1.18614	7.83123e-09	1.79483e-06	-0.00419764	ENSG00000131467	PSME3
16:3737000-3738558:-	Y	Y	1.93488	7.95988e-09	1.82146e-06	0.0938107	ENSG00000005339	CREBBP
17:75387795-75393403:-	Y	Y	-1.04231	8.00187e-09	1.82927e-06	-0.010548	ENSG00000177885	GRB2
5:73051100-73051348:+	Y	N	3.5535	8.03801e-09	1.83392e-06	0.533312	ENSG00000157107	FCHO2
18:12636341-12653000:-	Y	Y	-2.1639	8.03327e-09	1.83392e-06	-0.0322412	ENSG00000134278	SPIRE1
18:55553422-55585279:-	Y	Y	-1.47104	8.06791e-09	1.83893e-06	-0.0185201	ENSG00000196628	TCF4
2:66548020-66562081:+	Y	Y	-1.06766	8.15269e-09	1.85643e-06	-0.0126556	ENSG00000143995	MEIS1
2:209700339-209703986:+	Y	Y	-1.39578	8.24044e-09	1.87457e-06	-0.0105602	ENSG00000078018	MAP2
12:45776330-45804111:+	Y	Y	-1.31959	8.27227e-09	1.87997e-06	-0.00647527	ENSG00000189079	ARID2
4:99948811-99948813:-	Y	N	1.3444	8.32587e-09	1.8903e-06	0.0171426	ENSG00000164032	H2AZ1
4:99005871-99022294:+	Y	Y	-1.26973	8.34984e-09	1.89204e-06	-0.00779457	ENSG00000164024	METAP1
6:20846179-20955418:+	Y	Y	-1.31916	8.34467e-09	1.89204e-06	-0.00896038	ENSG00000145996	CDKAL1
8:67060546-67061291:-	Y	N	1.48677	8.37053e-09	1.89488e-06	0.0795125	ENSG00000121022	COPS5
6:2966591-2968778:-	Y	N	-1.08078	8.48773e-09	1.91953e-06	-0.0243331	ENSG00000124570	SERPINB6
7:33538262-33568170:+	Y	Y	-2.61325	8.61798e-09	1.94709e-06	-0.0447398	ENSG00000122507	BBS9
17:76212483-76240152:-	Y	Y	-1.82104	8.63108e-09	1.94816e-06	-0.0113891	ENSG00000141576	RNF157
3:69071618-69075082:-	Y	Y	-1.33025	8.69165e-09	1.95992e-06	-0.0160033	ENSG00000144744	UBA3
6:117575353-117577447:-	Y	Y	-1.54142	8.84843e-09	1.99334e-06	-0.0273581	ENSG00000047932	GOPC
19:29606490-29608656:+	Y	Y	2.35295	8.86592e-09	1.99534e-06	0.0322452	ENSG00000105171	POP4
3:119452531-119458017:-	Y	Y	-1.83559	8.97225e-09	2.01731e-06	-0.037491	ENSG00000176142	TMEM39A
10:110920975-110941376:+	Y	Y	-1.05751	9.04513e-09	2.03173e-06	-0.00570908	ENSG00000108061	SHOC2
17:31128508-31155982:+	Y	Y	-1.33451	9.0546e-09	2.03189e-06	-0.00776816	ENSG00000196712	NF1
11:94800312-94820299:+	Y	Y	-1.30366	9.10538e-09	2.04131e-06	-0.00492044	ENSG00000166025	AMOTL1
7:127807574-127844323:+	Y	Y	-1.11357	9.27655e-09	2.07768e-06	-0.00204456	ENSG00000197157	SND1
3:133120956-133124826:+	Y	Y	-1.78013	9.28986e-09	2.07865e-06	-0.0153509	ENSG00000144868	TMEM108
2:231161510-231163084:+	Y	N	-1.52786	9.3805e-09	2.0968e-06	-0.00739464	ENSG00000173692	PSMD1
5:146447409-146454517:+	Y	Y	-1.11119	9.38972e-09	2.0968e-06	-0.00474339	ENSG00000113649	TCERG1
8:109560930-109563396:+	Y	Y	1.84135	9.39808e-09	2.0968e-06	0.0638095	ENSG00000147654	EBAG9
19:52202035-52205962:+	Y	Y	-0.989164	9.45559e-09	2.10761e-06	-0.00278028	ENSG00000105568	PPP2R1A
1:173865283-173865352:-	Y	N	-0.942334	9.72324e-09	2.16518e-06	-0.130485	ENSG00000234741	GAS5
21:45649725-45668873:+	Y	Y	-1.44082	1.00141e-08	2.22782e-06	-0.0182622	ENSG00000183570	PCBP3
11:31473787-31477114:-	Y	Y	-2.12807	1.00564e-08	2.23507e-06	-0.00987689	ENSG00000148950	IMMP1L
3:185924009-185925084:-	Y	N	-1.32074	1.00777e-08	2.23553e-06	-0.0132228	ENSG00000136527	TRA2B
7:87935187-87964633:+	Y	Y	-1.51943	1.0074e-08	2.23553e-06	-0.0161071	ENSG00000008277	ADAM22
10:123155728-123157728:+	Y	Y	-0.839449	1.00928e-08	2.23674e-06	-0.00605741	ENSG00000154473	BUB3
7:141739757-141740714:+	Y	N	1.05258	1.0157e-08	2.24669e-06	0.027131	ENSG00000106028	SSBP1
11:19713963-19777801:+	Y	Y	-1.33824	1.01479e-08	2.24669e-06	-0.0209472	ENSG00000166833	NAV2
1:31919659-31924017:-	Y	Y	-1.53513	1.02692e-08	2.26935e-06	-0.00298407	ENSG00000184007	PTP4A2
2:79514692-79524656:+	Y	Y	-1.56363	1.02976e-08	2.27215e-06	-0.0115132	ENSG00000066032	CTNNA2
5:138166946-138167642:-	Y	Y	-1.29896	1.03015e-08	2.27215e-06	-0.0846811	ENSG00000112983	BRD8
14:23566809-23567110:-	Y	N	-1.49644	1.03552e-08	2.28182e-06	-0.199133	ENSG00000213983	AP1G2
11:8682817-8683187:+	Y	N	1.46222	1.04415e-08	2.29865e-06	0.0832316	ENSG00000166441	RPL27A
1:89846659-89929807:+	Y	Y	-1.75342	1.04549e-08	2.29943e-06	-0.0209404	ENSG00000171492	LRRC8D
9:37801406-37819287:+	Y	Y	-1.29551	1.05073e-08	2.30876e-06	-0.0151352	ENSG00000122741	DCAF10
6:36098055-36100187:+	Y	Y	-1.56901	1.05492e-08	2.31577e-06	-0.0478792	ENSG00000112062	MAPK14
9:3395597-3488775:-	Y	Y	-1.59515	1.05612e-08	2.31622e-06	-0.0269583	ENSG00000080298	RFX3
1:178125502-178230309:+	Y	Y	-1.91182	1.06326e-08	2.32966e-06	-0.0256612	ENSG00000075391	RASAL2
1:211829450-211830182:-	Y	N	-2.13955	1.07444e-08	2.34974e-06	-0.0365398	ENSG00000123684	LPGAT1
5:149517878-149520289:-	Y	Y	-1.03019	1.07416e-08	2.34974e-06	-0.0119611	ENSG00000113712	CSNK1A1
2:241325245-241325966:+	Y	Y	-1.24559	1.08961e-08	2.38018e-06	-0.0114375	ENSG00000168385	SEPTIN2
X:119577067-119580334:+	Y	Y	-1.45079	1.09041e-08	2.38018e-06	-0.0164301	ENSG00000077721	UBE2A
11:34053672-34055685:+	Y	Y	-1.09075	1.09232e-08	2.38127e-06	-0.00461538	ENSG00000135387	CAPRIN1
14:70908004-70942872:+	Y	Y	-1.57748	1.09297e-08	2.38127e-06	-0.0302385	ENSG00000100731	PCNX1
1:179873706-179876177:-	Y	N	-0.943992	1.10585e-08	2.40709e-06	-0.0146309	ENSG00000169905	TOR1AIP2
1:150294146-150294334:+	Y	N	0.727161	1.12184e-08	2.43959e-06	0.122827	ENSG00000266472	MRPS21
22:31403205-31411011:+	Y	Y	-1.20967	1.12967e-08	2.45432e-06	-0.00254847	ENSG00000185721	DRG1
7:127375035-127377185:-	Y	Y	-1.776	1.1323e-08	2.45774e-06	-0.0187116	ENSG00000048405	ZNF800
12:119004018-119102235:+	Y	Y	-1.59057	1.13835e-08	2.46857e-06	-0.0209599	ENSG00000139767	SRRM4
10:28537584-28537815:+	Y	N	-1.92761	1.1488e-08	2.48888e-06	-0.0331638	ENSG00000095787	WAC
21:37073474-37081595:+	Y	Y	-0.900725	1.1644e-08	2.52034e-06	-0.0650912	ENSG00000182670	TTC3
5:140687934-140688797:-	Y	N	-1.49496	1.17835e-08	2.54579e-06	-0.0271965	ENSG00000170445	HARS1
17:45630485-45630605:+	Y	N	2.09853	1.17771e-08	2.54579e-06	0.261166	ENSG00000204650	LINC02210
18:28045597-28097062:-	Y	Y	-1.04213	1.17968e-08	2.54629e-06	-0.00391922	ENSG00000170558	CDH2
X:24161843-24172714:+	Y	Y	-1.3418	1.18665e-08	2.55895e-06	-0.0171164	ENSG00000005889	ZFX
3:196740158-196765920:+	Y	Y	-1.16477	1.1904e-08	2.56282e-06	-0.00657055	ENSG00000180370	PAK2
7:82067209-82067256:-	N	N	2.74611	1.19065e-08	2.56282e-06	0.180082	ENSG00000153956	CACNA2D1
10:63465978-63521737:-	Y	Y	-1.71541	1.22016e-08	2.62391e-06	-0.0606001	ENSG00000171988	JMJD1C
1:182855714-182856233:+	Y	Y	-1.08793	1.23798e-08	2.65976e-06	-0.0179712	ENSG00000135829	DHX9
10:63380483-63465494:-	Y	Y	-1.50348	1.25163e-08	2.68659e-06	-0.0222103	ENSG00000171988	JMJD1C
15:82259156-82261687:-	Y	Y	-2.50463	1.25939e-08	2.70075e-06	-0.0428235	ENSG00000140598	EFL1
3:133192828-133229265:+	Y	Y	-1.72772	1.26705e-08	2.71466e-06	-0.00489142	ENSG00000144868	TMEM108
6:38088374-38116571:+	Y	Y	-1.11375	1.27484e-08	2.72884e-06	-0.00604808	ENSG00000156639	ZFAND3
6:149399185-149408287:+	Y	Y	-1.13021	1.28121e-08	2.73994e-06	-0.00490058	ENSG00000055208	TAB2
12:82986574-83030797:+	Y	Y	-1.56448	1.28781e-08	2.75153e-06	-0.0152916	ENSG00000179104	TMTC2
1:64807475-64812737:+	Y	Y	-1.46895	1.291e-08	2.75417e-06	-0.047514	ENSG00000162437	RAVER2
10:121764480-121782493:-	Y	Y	-1.38075	1.29142e-08	2.75417e-06	-0.00870441	ENSG00000107669	ATE1
4:154540937-154541957:-	Y	Y	-1.60669	1.29342e-08	2.75589e-06	-0.0293913	ENSG00000171566	PLRG1
17:7315124-7315251:-	Y	N	1.43073	1.29598e-08	2.75883e-06	0.211575	ENSG00000132522	GPS2
9:37819402-37842088:+	Y	Y	-1.44691	1.30322e-08	2.76916e-06	-0.0185751	ENSG00000122741	DCAF10
9:27558608-27560226:-	Y	N	-1.29619	1.30238e-08	2.76916e-06	-0.0640671	ENSG00000147894	C9orf72
7:155746666-155763808:+	Y	Y	-1.00158	1.31115e-08	2.78346e-06	-0.0142409	ENSG00000184863	RBM33
3:17406721-17428449:-	Y	Y	-1.81717	1.33754e-08	2.83687e-06	-0.00399138	ENSG00000131374	TBC1D5
5:51391446-51391723:+	N	N	-0.962933	1.34096e-08	2.83982e-06	-0.0251266	ENSG00000016082	ISL1
14:96536000-96536894:+	Y	Y	-1.2848	1.34138e-08	2.83982e-06	-0.0274335	ENSG00000090060	PAPOLA
4:77058636-77064712:-	Y	Y	-1.07775	1.35948e-08	2.87552e-06	-0.00155821	ENSG00000118816	CCNI
2:148220034-148233244:+	Y	Y	-1.64676	1.36128e-08	2.87671e-06	-0.00923916	ENSG00000204406	MBD5
19:5598485-5598792:-	Y	N	2.69219	1.36478e-08	2.88149e-06	0.400236	ENSG00000130254	SAFB2
7:90824768-90863174:+	Y	Y	-1.58801	1.36934e-08	2.88849e-06	-0.00443617	ENSG00000058091	CDK14
8:71225306-71244602:-	Y	Y	-0.97389	1.3817e-08	2.91191e-06	-0.014298	ENSG00000104313	EYA1
10:48364657-48401611:+	Y	Y	-1.18131	1.38585e-08	2.918e-06	-0.00743779	ENSG00000107643	MAPK8
17:28856686-28857938:+	Y	Y	-1.49589	1.39893e-08	2.94288e-06	-0.0204526	ENSG00000132591	ERAL1
4:95206797-95216042:-	Y	Y	-0.847811	1.40292e-08	2.94861e-06	-0.0113664	ENSG00000182168	UNC5C
1:33335707-33349596:-	Y	Y	-1.44915	1.41488e-08	2.96908e-06	-0.0680305	ENSG00000134686	PHC2
2:28752838-28759641:+	Y	Y	-0.907422	1.41523e-08	2.96908e-06	-0.00328115	ENSG00000213639	PPP1CB
9:125865306-125915685:+	Y	Y	-1.54284	1.41781e-08	2.97181e-06	-0.011335	ENSG00000167081	PBX3
22:32475958-32478034:+	Y	Y	-2.04081	1.42174e-08	2.97737e-06	-0.0043348	ENSG00000100225	FBXO7
18:55322346-55332066:-	Y	Y	-1.57479	1.43282e-08	2.99786e-06	-0.00882382	ENSG00000196628	TCF4
4:41747710-41748369:-	Y	Y	-0.816744	1.43438e-08	2.99843e-06	-0.0310733	ENSG00000109132	PHOX2B
4:90127832-90235030:+	Y	Y	-2.75484	1.44234e-08	3.01234e-06	-0.0831082	ENSG00000184305	CCSER1
2:209704621-209705381:+	Y	Y	-1.9786	1.44539e-08	3.016e-06	-0.0166684	ENSG00000078018	MAP2
18:26032533-26035004:-	Y	Y	-1.20389	1.46074e-08	3.04529e-06	-0.0152569	ENSG00000141380	SS18
1:182860306-182866443:+	Y	Y	-0.743575	1.47455e-08	3.07133e-06	-0.00507349	ENSG00000135829	DHX9
10:28591834-28595694:+	Y	Y	-1.08382	1.48993e-08	3.10059e-06	-0.00874208	ENSG00000095787	WAC
4:7838704-7842687:-	Y	Y	-1.44258	1.49391e-08	3.10607e-06	-0.0120482	ENSG00000196526	AFAP1
2:95101724-95104348:-	Y	N	-1.32221	1.51793e-08	3.14993e-06	-0.0619654	ENSG00000144029	MRPS5
3:43289790-43299753:+	Y	Y	-1.84266	1.51789e-08	3.14993e-06	-0.0422982	ENSG00000163788	SNRK
18:55423758-55461018:-	Y	Y	-0.934249	1.52044e-08	3.14993e-06	-0.00505856	ENSG00000196628	TCF4
20:32311182-32316146:+	Y	Y	1.57317	1.51986e-08	3.14993e-06	0.0263526	ENSG00000101350	KIF3B
14:64511249-64511384:+	Y	N	-2.2174	1.52655e-08	3.15978e-06	-0.22062	ENSG00000126804	ZBTB1
12:57490645-57498156:+	Y	Y	-0.897102	1.54479e-08	3.19469e-06	-0.00314602	ENSG00000166986	MARS1
1:178233881-178283563:+	Y	Y	-2.06471	1.55505e-08	3.21303e-06	-0.00825878	ENSG00000075391	RASAL2
3:133119509-133120879:+	Y	Y	-2.025	1.57416e-08	3.24962e-06	-0.0199123	ENSG00000144868	TMEM108
6:24405242-24408407:+	Y	Y	-1.45779	1.57779e-08	3.25423e-06	-0.0128984	ENSG00000124532	MRS2
10:119580011-119580470:-	Y	N	-1.32898	1.5905e-08	3.27754e-06	-0.0364985	ENSG00000151923	TIAL1
18:49492258-49492274:-	Y	N	1.4513	1.59555e-08	3.28501e-06	0.111876	ENSG00000265681	RPL17
1:207767652-207767778:+	Y	N	-1.58203	1.60828e-08	3.3083e-06	-0.153428	ENSG00000117335	CD46
17:27306883-27307743:+	Y	N	-1.23686	1.62125e-08	3.33201e-06	-0.0477424	ENSG00000109046	WSB1
1:211793327-211829058:-	Y	Y	-1.56755	1.62356e-08	3.33381e-06	-0.00724634	ENSG00000123684	LPGAT1
3:177091181-177098465:-	Y	Y	-1.38844	1.65444e-08	3.39423e-06	-0.00684116	ENSG00000177565	TBL1XR1
7:123709224-123748617:-	Y	Y	-1.28771	1.67435e-08	3.429e-06	-0.0128612	ENSG00000106299	WASL
12:98593745-98593974:+	Y	N	0.831628	1.67319e-08	3.429e-06	0.0629452	ENSG00000075415	SLC25A3
1:21726571-21727850:-	Y	Y	-1.42992	1.68879e-08	3.45372e-06	-0.0689489	ENSG00000090686	USP48
2:55010450-55025085:-	Y	Y	-1.75915	1.6894e-08	3.45372e-06	-0.0031224	ENSG00000115310	RTN4
1:50738955-50744683:-	Y	Y	-1.72943	1.69456e-08	3.46124e-06	-0.00237816	ENSG00000185104	FAF1
8:67059446-67060320:-	Y	N	1.50346	1.73164e-08	3.53385e-06	0.0838316	ENSG00000121022	COPS5
4:140997035-141053665:-	Y	Y	-1.17864	1.75206e-08	3.57179e-06	-0.00995493	ENSG00000170153	RNF150
10:70055178-70064815:+	Y	Y	-1.26283	1.75331e-08	3.57179e-06	-0.00557696	ENSG00000099284	MACROH2A2
12:56638424-56639105:-	Y	Y	-0.939413	1.76246e-08	3.58728e-06	-0.0041696	ENSG00000110955	ATP5F1B
1:243211965-243221554:-	Y	Y	-1.04705	1.77301e-08	3.60559e-06	-0.00427951	ENSG00000143702	CEP170
20:5100932-5106187:-	Y	Y	-0.863515	1.77612e-08	3.60877e-06	-0.0141173	ENSG00000089063	TMEM230
6:79043004-79052042:-	Y	Y	-1.39933	1.78406e-08	3.62173e-06	-0.00801485	ENSG00000146247	PHIP
5:102808232-102837686:+	Y	Y	-1.41892	1.79542e-08	3.64159e-06	-0.00363801	ENSG00000145730	PAM
6:138951161-138987529:-	Y	Y	-1.62487	1.80404e-08	3.65589e-06	-0.0167103	ENSG00000135597	REPS1
1:44256922-44283985:-	Y	Y	-0.929325	1.81275e-08	3.67033e-06	-0.00564635	ENSG00000117419	ERI3
3:196052185-196052697:-	Y	Y	2.18458	1.82112e-08	3.67942e-06	0.0336937	ENSG00000072274	TFRC
6:5613321-5771290:+	Y	Y	-1.53575	1.82024e-08	3.67942e-06	-0.0161972	ENSG00000145982	FARS2
7:133254019-133274981:+	Y	Y	-1.2189	1.822e-08	3.67942e-06	-0.00908995	ENSG00000131558	EXOC4
7:133375029-133396138:+	Y	Y	-1.09718	1.82709e-08	3.68649e-06	-0.0122368	ENSG00000131558	EXOC4
6:79026165-79042619:-	Y	Y	0.977472	1.83773e-08	3.70474e-06	0.0211703	ENSG00000146247	PHIP
18:21741813-21765771:+	Y	Y	-1.45412	1.86319e-08	3.7528e-06	-0.012567	ENSG00000101752	MIB1
19:38648261-38663541:+	Y	Y	-1.48809	1.86805e-08	3.75934e-06	-0.0116465	ENSG00000130402	ACTN4
2:173916833-173918592:-	Y	Y	-1.48796	1.88021e-08	3.77725e-06	-0.00680537	ENSG00000172845	SP3
7:135387070-135387581:-	Y	N	-2.06852	1.8786e-08	3.77725e-06	-0.139146	ENSG00000080802	CNOT4
7:139374673-139375203:+	Y	N	-2.33702	1.8959e-08	3.80548e-06	-0.0251506	ENSG00000146963	LUC7L2
14:60285742-60288555:+	Y	N	-1.26622	1.91352e-08	3.83752e-06	-0.0453191	ENSG00000100614	PPM1A
11:19777983-19813717:+	Y	Y	-1.41676	1.92381e-08	3.85483e-06	-0.0112751	ENSG00000166833	NAV2
17:77380250-77400557:+	Y	Y	-1.18876	1.98021e-08	3.96441e-06	-0.00314441	ENSG00000184640	SEPTIN9
7:152313206-152314780:-	Y	Y	-2.05299	1.98226e-08	3.9651e-06	-0.0197815	ENSG00000055609	KMT2C
7:11375879-11376569:-	Y	Y	-4.74324	2.00418e-08	4.00549e-06	-0.0348266	ENSG00000005108	THSD7A
13:77753359-77760827:+	Y	Y	-1.46172	2.0205e-08	4.03464e-06	-0.0140551	ENSG00000139737	SLAIN1
15:72475015-72496790:+	Y	Y	-1.18068	2.03776e-08	4.06561e-06	-0.0167113	ENSG00000166233	ARIH1
9:131184373-131187288:+	Y	N	-1.41835	2.07081e-08	4.128e-06	-0.0182275	ENSG00000126883	NUP214
13:79359687-79365577:-	Y	Y	-1.38334	2.10389e-08	4.19033e-06	-0.0166708	ENSG00000139746	RBM26
15:59004175-59030803:+	Y	Y	-1.22665	2.12285e-08	4.22447e-06	-0.00866624	ENSG00000157450	RNF111
11:78341881-78364015:-	Y	Y	-1.35823	2.13119e-08	4.23515e-06	-0.0168475	ENSG00000033327	GAB2
20:36497603-36497816:+	Y	Y	1.30546	2.13186e-08	4.23515e-06	0.118746	ENSG00000080845	DLGAP4
2:11779646-11782200:+	Y	Y	-1.63029	2.15676e-08	4.27729e-06	-0.009946	ENSG00000134324	LPIN1
20:35707362-35707939:-	Y	N	-1.32971	2.15654e-08	4.27729e-06	-0.0406943	ENSG00000131051	RBM39
12:15359296-15410279:+	Y	Y	-1.69412	2.15905e-08	4.27816e-06	-0.00986269	ENSG00000151490	PTPRO
22:23804384-23814990:+	Y	Y	-0.918423	2.16591e-08	4.28809e-06	-0.00355118	ENSG00000099956	SMARCB1
2:108570801-108580178:+	Y	Y	-1.60588	2.1864e-08	4.32498e-06	-0.0166983	ENSG00000169756	LIMS1
17:28720431-28720616:+	Y	Y	1.57531	2.19827e-08	4.34475e-06	0.0107532	ENSG00000198242	RPL23A
2:173956233-173962971:-	Y	Y	-1.58614	2.20507e-08	4.35188e-06	-0.0134813	ENSG00000172845	SP3
7:107929793-107931216:-	Y	Y	-1.24504	2.20751e-08	4.35188e-06	-0.00939821	ENSG00000091136	LAMB1
20:58889407-58889525:+	Y	N	0.768973	2.20707e-08	4.35188e-06	0.0925717	ENSG00000087460	GNAS
1:241510556-241511866:-	Y	Y	-1.20133	2.20954e-08	4.35219e-06	-0.00709469	ENSG00000091483	FH
15:72202054-72202348:-	Y	N	-1.0279	2.22874e-08	4.38629e-06	-0.00677772	ENSG00000067225	PKM
3:16472806-16482745:-	Y	Y	-1.10981	2.23623e-08	4.3973e-06	-0.00639949	ENSG00000131378	RFTN1
1:167776167-167787066:+	Y	Y	-0.939252	2.24589e-08	4.41256e-06	-0.00404048	ENSG00000197965	MPZL1
13:19970072-19993062:+	Y	Y	-0.972419	2.2679e-08	4.45203e-06	-0.00636301	ENSG00000121741	ZMYM2
5:78388915-78415519:+	Y	Y	-1.43449	2.27318e-08	4.45862e-06	-0.00514715	ENSG00000085365	SCAMP1
1:225531058-225535506:-	Y	Y	-1.42743	2.30542e-08	4.51805e-06	-0.00477033	ENSG00000154380	ENAH
4:94457185-94489034:+	Y	Y	-1.38009	2.31091e-08	4.52498e-06	-0.00553407	ENSG00000163110	PDLIM5
5:140486567-140486957:+	Y	N	-1.4383	2.31693e-08	4.53295e-06	-0.0848189	ENSG00000131503	ANKHD1
4:98387508-98391951:+	Y	Y	-1.54181	2.32026e-08	4.53562e-06	-0.0107151	ENSG00000138698	RAP1GDS1
5:14291229-14293011:+	Y	Y	-1.71862	2.32882e-08	4.54853e-06	-0.0431146	ENSG00000038382	TRIO
2:216141320-216148082:+	Y	Y	-0.948514	2.34356e-08	4.57128e-06	-0.00158776	ENSG00000079246	XRCC5
3:33696934-33717807:-	Y	Y	-1.3929	2.34441e-08	4.57128e-06	-0.00715994	ENSG00000163539	CLASP2
1:50801678-50857928:-	Y	Y	-1.11351	2.35808e-08	4.59098e-06	-0.00346337	ENSG00000185104	FAF1
1:243163341-243164283:-	Y	Y	-1.41605	2.35847e-08	4.59098e-06	-0.0241438	ENSG00000143702	CEP170
13:77719678-77741159:+	Y	Y	-1.58021	2.39414e-08	4.65651e-06	-0.0108515	ENSG00000139737	SLAIN1
20:541100-543053:-	Y	Y	-0.992421	2.46795e-08	4.79605e-06	-0.0039108	ENSG00000101266	CSNK2A1
2:147975976-147981927:-	Y	Y	-1.47218	2.48322e-08	4.82169e-06	-0.00950273	ENSG00000115947	ORC4
18:55384197-55400851:-	Y	Y	-1.04567	2.49053e-08	4.83184e-06	-0.0171267	ENSG00000196628	TCF4
4:73125313-73135116:-	Y	Y	-1.45646	2.49533e-08	4.8371e-06	-0.00998794	ENSG00000132466	ANKRD17
9:3257200-3262934:-	Y	Y	-1.78672	2.51317e-08	4.86762e-06	-0.0202914	ENSG00000080298	RFX3
11:86031612-86068650:-	Y	Y	-1.06315	2.5156e-08	4.86826e-06	-0.00911515	ENSG00000073921	PICALM
7:32495803-32531614:+	Y	Y	-0.895361	2.52664e-08	4.88556e-06	-0.0121921	ENSG00000105778	AVL9
1:41143113-41151613:-	Y	Y	-1.75031	2.53234e-08	4.89249e-06	-0.0173403	ENSG00000010803	SCMH1
12:69812778-69812877:+	Y	Y	-3.48537	2.5472e-08	4.91302e-06	-0.379011	ENSG00000127328	RAB3IP
14:61737110-61738086:+	Y	Y	-1.48295	2.54581e-08	4.91302e-06	-0.0112277	ENSG00000100644	HIF1A
7:87885184-87886843:+	Y	Y	-1.11688	2.55383e-08	4.92172e-06	-0.0130349	ENSG00000006634	DBF4
6:106308364-106308491:-	Y	N	-2.93802	2.57482e-08	4.95805e-06	-0.451067	ENSG00000057663	ATG5
2:231739203-231778722:-	Y	Y	-1.18096	2.61594e-08	5.03297e-06	-0.0192155	ENSG00000156973	PDE6D
8:100719664-100720804:-	Y	Y	-0.951796	2.61806e-08	5.03297e-06	-0.00242922	ENSG00000070756	PABPC1
8:71270239-71271757:-	Y	Y	-1.24834	2.62389e-08	5.03999e-06	-0.0126934	ENSG00000104313	EYA1
1:31282484-31289253:-	Y	Y	-0.970238	2.64258e-08	5.06424e-06	-0.00396425	ENSG00000060688	SNRNP40
10:68907971-68910306:+	Y	Y	1.82558	2.64306e-08	5.06424e-06	0.0565474	ENSG00000107625	DDX50
16:74649244-74651919:-	Y	Y	-1.18694	2.63969e-08	5.06424e-06	-0.0190251	ENSG00000168411	RFWD3
14:88754672-88792306:-	Y	Y	-1.06944	2.67117e-08	5.11387e-06	-0.0217924	ENSG00000165521	EML5
1:167220959-167241406:+	Y	Y	-1.26178	2.70351e-08	5.17153e-06	-0.0289731	ENSG00000143190	POU2F1
5:10354672-10377797:+	Y	Y	-0.992536	2.71073e-08	5.18106e-06	-0.00748694	ENSG00000145495	MARCHF6
14:74882625-74885585:+	Y	Y	-1.33881	2.71833e-08	5.19132e-06	-0.045497	ENSG00000119689	DLST
2:216162049-216190224:+	Y	Y	-0.678946	2.74043e-08	5.22493e-06	-0.00169718	ENSG00000079246	XRCC5
9:36191274-36197550:+	Y	Y	-0.862016	2.73997e-08	5.22493e-06	-0.00224978	ENSG00000122705	CLTA
11:117293189-117293870:-	Y	N	-1.64625	2.77029e-08	5.27752e-06	-0.0449654	ENSG00000186318	BACE1
1:211274263-211276256:+	Y	Y	-1.27956	2.79177e-08	5.31407e-06	-0.0217286	ENSG00000117625	RCOR3
5:135359629-135359721:-	Y	N	-1.40423	2.80213e-08	5.32943e-06	-0.0527529	ENSG00000113648	MACROH2A1
11:78318220-78341759:-	Y	Y	-1.52148	2.81413e-08	5.34786e-06	-0.0142021	ENSG00000033327	GAB2
20:43458730-43459152:+	Y	Y	-1.46849	2.82151e-08	5.3575e-06	-0.0547872	ENSG00000124193	SRSF6
21:36040656-36041806:-	Y	Y	3.2609	2.82905e-08	5.36742e-06	0.459129	ENSG00000185917	SETD4
21:17599092-17604144:-	Y	Y	-1.51718	2.83794e-08	5.37989e-06	-0.0155535	ENSG00000154640	BTG3
10:26751784-26755654:-	Y	Y	-1.41903	2.84559e-08	5.38999e-06	-0.0150944	ENSG00000136754	ABI1
5:56856751-56859714:+	Y	Y	-1.64059	2.87047e-08	5.43268e-06	-0.0208451	ENSG00000095015	MAP3K1
10:8064139-8069472:+	Y	Y	-0.716664	2.87939e-08	5.44512e-06	-0.0129774	ENSG00000107485	GATA3
13:37023045-37023548:-	Y	Y	-1.62228	2.88344e-08	5.44834e-06	-0.124285	ENSG00000102710	SUPT20H
17:12069850-12081355:+	Y	Y	-1.76599	2.88663e-08	5.44993e-06	-0.020738	ENSG00000065559	MAP2K4
1:193060284-193069015:+	Y	Y	-0.947674	2.8974e-08	5.46582e-06	-0.0215986	ENSG00000116747	RO60
5:103184745-103186319:+	Y	Y	-1.73601	2.9138e-08	5.49228e-06	-0.0188984	ENSG00000145725	PPIP5K2
X:70333690-70341798:+	Y	Y	-1.40113	2.91811e-08	5.49594e-06	-0.0173409	ENSG00000090889	KIF4A
17:7503957-7508250:+	Y	Y	-1.12086	2.92228e-08	5.49934e-06	-0.00506683	ENSG00000181222	POLR2A
5:126777868-126804775:+	Y	Y	-0.774414	2.92781e-08	5.50528e-06	-0.00255248	ENSG00000113368	LMNB1
1:1262853-1263345:-	Y	N	-1.1873	2.93954e-08	5.52285e-06	-0.0290042	ENSG00000160087	UBE2J2
20:58905481-58907980:+	Y	N	-1.02069	3.04185e-08	5.71047e-06	-0.000888835	ENSG00000087460	GNAS
10:28611010-28611254:+	Y	N	-1.89881	3.09225e-08	5.80038e-06	-0.0432156	ENSG00000095787	WAC
22:19060956-19063201:-	Y	Y	-1.32123	3.10185e-08	5.81369e-06	-0.0140789	ENSG00000070413	DGCR2
20:33490302-33562333:+	Y	Y	-1.2312	3.11334e-08	5.83051e-06	-0.0133968	ENSG00000078699	CBFA2T2
18:63334923-63335099:-	N	N	2.71394	3.11686e-08	5.8324e-06	0.135215	ENSG00000119537	KDSR
1:224424720-224429296:-	Y	Y	-1.0052	3.12701e-08	5.84668e-06	-0.0211839	ENSG00000162923	WDR26
X:155545278-155612127:-	Y	Y	-1.86322	3.16528e-08	5.91347e-06	-0.0425989	ENSG00000185973	TMLHE
10:60787070-60787670:+	Y	Y	-0.992398	3.1758e-08	5.92834e-06	-0.0186782	ENSG00000170312	CDK1
3:9424218-9424466:+	Y	N	-2.53548	3.22754e-08	6.02009e-06	-0.0485784	ENSG00000168137	SETD5
12:120535543-120539367:+	Y	Y	-1.63281	3.27891e-08	6.111e-06	-0.00968701	ENSG00000022840	RNF10
19:15401604-15403318:-	Y	N	1.63885	3.29143e-08	6.1294e-06	0.0720387	ENSG00000011243	AKAP8L
1:215567769-215573785:+	Y	Y	-1.33453	3.29922e-08	6.13897e-06	-0.0175339	ENSG00000136636	KCTD3
5:72851205-72851237:+	Y	N	-1.85736	3.30882e-08	6.14699e-06	-0.0526106	ENSG00000083312	TNPO1
12:15883677-15889927:+	Y	Y	-0.868361	3.30721e-08	6.14699e-06	-0.00265932	ENSG00000023734	STRAP
7:88208566-88208859:-	Y	Y	-1.26998	3.31826e-08	6.15959e-06	-0.0237371	ENSG00000075142	SRI
17:47658661-47660881:+	Y	Y	-0.734298	3.33737e-08	6.19012e-06	-0.00595195	ENSG00000108424	KPNB1
8:100925040-100932028:-	Y	Y	-0.673938	3.34167e-08	6.19314e-06	-0.00112426	ENSG00000164924	YWHAZ
20:58390341-58418210:+	Y	Y	-0.955767	3.35395e-08	6.21093e-06	-0.00482342	ENSG00000124164	VAPB
1:42311111-42315345:-	Y	Y	-2.06017	3.35765e-08	6.21282e-06	-0.0151941	ENSG00000198815	FOXJ3
22:28719486-28721517:-	Y	Y	2.47784	3.36963e-08	6.23004e-06	0.259104	ENSG00000183765	CHEK2
4:118805955-118815027:-	Y	Y	-1.42865	3.37421e-08	6.23353e-06	-0.00645678	ENSG00000150961	SEC24D
12:40828302-40895949:+	Y	Y	-1.64995	3.38882e-08	6.25554e-06	-0.00365882	ENSG00000018236	CNTN1
9:93530732-93531406:+	Y	N	-1.9068	3.40946e-08	6.28365e-06	-0.0271432	ENSG00000048828	FAM120A
11:8683188-8683200:+	Y	N	1.54234	3.40837e-08	6.28365e-06	0.155458	ENSG00000166441	RPL27A
18:3249926-3252217:+	Y	Y	-1.46776	3.43522e-08	6.32609e-06	-0.0122446	ENSG00000101608	MYL12A
4:94253672-94264527:+	Y	Y	-1.03165	3.44481e-08	6.33873e-06	-0.0177771	ENSG00000163104	SMARCAD1
9:136726104-136726239:-	Y	Y	-1.22458	3.45473e-08	6.35194e-06	-0.124262	ENSG00000233016	SNHG7
1:225535564-225554905:-	Y	Y	-1.26332	3.46737e-08	6.3651e-06	-0.00536603	ENSG00000154380	ENAH
7:155644920-155665174:+	Y	Y	-1.36891	3.46496e-08	6.3651e-06	-0.0285426	ENSG00000184863	RBM33
5:110742090-110743729:+	Y	Y	-1.67561	3.47352e-08	6.37135e-06	-0.014834	ENSG00000164209	SLC25A46
2:148875744-148922136:+	Y	Y	-1.12852	3.48263e-08	6.37293e-06	-0.00719058	ENSG00000168280	KIF5C
7:44681849-44693824:+	Y	Y	-1.045	3.4826e-08	6.37293e-06	-0.00360264	ENSG00000105953	OGDH
7:76330234-76358721:-	Y	Y	-0.703319	3.47946e-08	6.37293e-06	-0.00167975	ENSG00000170027	YWHAG
17:77405141-77419801:+	Y	Y	-1.18143	3.49824e-08	6.39646e-06	-0.00272192	ENSG00000184640	SEPTIN9
17:45630607-45633048:+	Y	Y	1.66396	3.53121e-08	6.45166e-06	0.0823006	ENSG00000204650	LINC02210
2:152676780-152677450:-	Y	Y	-1.64908	3.54544e-08	6.47257e-06	-0.0218064	ENSG00000196504	PRPF40A
20:49656703-49713575:-	Y	Y	-1.16442	3.57104e-08	6.51417e-06	-0.0134568	ENSG00000158470	B4GALT5
3:112550263-112553279:-	Y	Y	-1.63662	3.58001e-08	6.52246e-06	-0.0114573	ENSG00000144848	ATG3
20:25248422-25259236:+	Y	Y	-1.21044	3.58121e-08	6.52246e-06	-0.00424042	ENSG00000100994	PYGB
12:31298522-31303494:-	Y	Y	-0.96455	3.58799e-08	6.52969e-06	-0.00982906	ENSG00000139146	SINHCAF
9:26935207-26946896:-	Y	Y	-0.990847	3.66466e-08	6.66399e-06	-0.00485947	ENSG00000137055	PLAA
12:78868912-78926596:+	Y	Y	-1.68497	3.66818e-08	6.66517e-06	-0.0199663	ENSG00000067715	SYT1
11:10799306-10799361:-	Y	N	1.60024	3.69687e-08	6.70155e-06	0.0106334	ENSG00000110321	EIF4G2
11:10806503-10806819:-	Y	N	-1.28715	3.69517e-08	6.70155e-06	-0.0123205	ENSG00000110321	EIF4G2
14:71503947-71512742:+	Y	Y	-2.17047	3.69536e-08	6.70155e-06	-0.0107505	ENSG00000197555	SIPA1L1
9:3490346-3525746:-	Y	Y	-1.45965	3.70819e-08	6.71683e-06	-0.0563487	ENSG00000080298	RFX3
11:63714480-63718701:+	Y	Y	-1.25691	3.71918e-08	6.73149e-06	-0.00404872	ENSG00000133318	RTN3
18:55321987-55322222:-	Y	N	-1.30142	3.73215e-08	6.74968e-06	-0.0455929	ENSG00000196628	TCF4
7:141739191-141739756:+	Y	N	0.994495	3.75158e-08	6.77955e-06	0.0371586	ENSG00000106028	SSBP1
12:15890670-15894046:+	Y	Y	-0.985683	3.75455e-08	6.77964e-06	-0.00236756	ENSG00000023734	STRAP
2:161371323-161381359:+	Y	Y	-1.12574	3.79416e-08	6.84052e-06	-0.0046609	ENSG00000115233	PSMD14
12:108538204-108538933:-	Y	Y	-1.49645	3.79224e-08	6.84052e-06	-0.0361646	ENSG00000075856	SART3
13:44437346-44474217:-	Y	Y	-1.47767	3.80894e-08	6.86183e-06	-0.00631993	ENSG00000102804	TSC22D1
2:70696397-70704320:-	Y	Y	-1.48598	3.82333e-08	6.8824e-06	-0.0108965	ENSG00000075340	ADD2
11:10806264-10806502:-	Y	N	-1.31934	3.83166e-08	6.89206e-06	-0.0133131	ENSG00000110321	EIF4G2
18:21819647-21838364:+	Y	Y	-1.13897	3.84878e-08	6.91748e-06	-0.00483547	ENSG00000101752	MIB1
2:175127232-175130137:-	Y	Y	-1.50765	3.86433e-08	6.94006e-06	-0.0132356	ENSG00000115966	ATF2
1:151408829-151411624:-	Y	Y	-1.14903	3.8719e-08	6.94291e-06	-0.0128398	ENSG00000143442	POGZ
9:125935608-125949377:+	Y	Y	-1.36804	3.8697e-08	6.94291e-06	-0.0205028	ENSG00000167081	PBX3
6:44249675-44249684:+	Y	N	-1.02814	3.87837e-08	6.94915e-06	-0.0282386	ENSG00000096384	HSP90AB1
8:30074056-30078211:-	Y	Y	-0.976767	3.8922e-08	6.96854e-06	-0.0021501	ENSG00000133872	SARAF
8:124330793-124371853:-	Y	Y	-1.69336	3.90137e-08	6.97957e-06	-0.0223265	ENSG00000164983	TMEM65
7:133576873-133601837:+	Y	Y	-1.5337	3.95956e-08	7.07822e-06	-0.00476188	ENSG00000131558	EXOC4
6:11538375-11565665:+	Y	Y	-2.9242	3.97197e-08	7.09494e-06	-0.0302895	ENSG00000205269	TMEM170B
1:27419089-27428760:-	Y	Y	-1.28197	3.99675e-08	7.1337e-06	-0.00373302	ENSG00000158195	WASF2
3:16484836-16493724:-	Y	Y	-1.13861	4.02122e-08	7.16635e-06	-0.00635699	ENSG00000131378	RFTN1
9:127642564-127651602:+	Y	Y	1.23412	4.01983e-08	7.16635e-06	0.0105431	ENSG00000136854	STXBP1
2:42208083-42245504:+	Y	Y	-1.04374	4.05222e-08	7.21607e-06	-0.0039167	ENSG00000143924	EML4
2:25845564-25878165:-	Y	Y	-1.2181	4.05707e-08	7.21917e-06	-0.00924743	ENSG00000143970	ASXL2
7:111099963-111122414:+	Y	Y	-1.18287	4.07263e-08	7.2413e-06	-0.00704573	ENSG00000173114	LRRN3
6:152975622-152982856:-	Y	Y	-1.24231	4.10034e-08	7.28497e-06	-0.0395378	ENSG00000112029	FBXO5
9:125750511-125777981:+	Y	Y	-1.45525	4.18633e-08	7.43207e-06	-0.029642	ENSG00000167081	PBX3
1:26729864-26731151:+	Y	Y	-1.23336	4.19898e-08	7.44882e-06	-0.0448659	ENSG00000117713	ARID1A
3:12071684-12140650:+	Y	Y	-1.98502	4.21772e-08	7.47015e-06	-0.0336989	ENSG00000157152	SYN2
9:100026360-100052416:-	Y	Y	-1.26843	4.21556e-08	7.47015e-06	-0.00581931	ENSG00000023318	ERP44
12:69257906-69258034:+	Y	N	-1.51276	4.22066e-08	7.47015e-06	-0.0569515	ENSG00000111605	CPSF6
20:62910021-62910773:-	Y	Y	1.83515	4.23409e-08	7.48821e-06	0.0699129	ENSG00000101191	DIDO1
18:41971444-41984879:+	Y	Y	-1.27851	4.26652e-08	7.53982e-06	-0.00464451	ENSG00000078142	PIK3C3
3:197859440-197865422:+	Y	Y	-1.33197	4.27901e-08	7.55614e-06	-0.0399048	ENSG00000186001	LRCH3
13:79506220-79518991:+	Y	Y	-1.50838	4.28343e-08	7.55818e-06	-0.00433424	ENSG00000102471	NDFIP2
1:150083308-150085802:+	Y	Y	-1.16902	4.30456e-08	7.58969e-06	-0.0237213	ENSG00000136631	VPS45
2:1693135-1744255:-	Y	Y	-1.1857	4.33024e-08	7.62918e-06	-0.00285315	ENSG00000130508	PXDN
9:86274243-86281968:-	Y	Y	-1.52444	4.37245e-08	7.69771e-06	-0.0194587	ENSG00000135070	ISCA1
1:235122460-235128594:-	Y	Y	-0.75018	4.38243e-08	7.70943e-06	-0.00224875	ENSG00000173726	TOMM20
5:111734670-111734742:-	Y	N	-1.33573	4.39205e-08	7.72049e-06	-0.0548716	ENSG00000134986	NREP
18:28009873-28011845:-	Y	Y	-1.20573	4.41531e-08	7.7555e-06	-0.00454856	ENSG00000170558	CDH2
11:61416520-61419921:-	Y	Y	-0.944536	4.44797e-08	7.80312e-06	-0.0112371	ENSG00000149532	CPSF7
17:35682825-35707913:+	Y	Y	-1.11647	4.44915e-08	7.80312e-06	-0.00487218	ENSG00000006125	AP2B1
17:21028675-21042219:-	Y	Y	-0.863213	4.45555e-08	7.80845e-06	-0.00306825	ENSG00000124422	USP22
12:12521464-12554535:-	Y	Y	-1.09237	4.46302e-08	7.81564e-06	-0.00776008	ENSG00000111266	DUSP16
17:35660121-35670856:+	Y	Y	-0.843591	4.50044e-08	7.87523e-06	-0.00299594	ENSG00000006125	AP2B1
2:230814115-230817753:+	Y	Y	1.97142	4.5283e-08	7.91287e-06	0.0266007	ENSG00000135932	CAB39
17:7315121-7315123:-	Y	N	1.58214	4.52877e-08	7.91287e-06	0.256866	ENSG00000132522	GPS2
2:73386193-73408621:+	Y	Y	-1.53764	4.53559e-08	7.91883e-06	-0.0224009	ENSG00000116127	ALMS1
7:50479964-50492646:-	Y	Y	-1.08049	4.55418e-08	7.94531e-06	-0.00321896	ENSG00000132437	DDC
21:32354998-32355448:-	Y	Y	-2.07818	4.55813e-08	7.94621e-06	-0.0532669	ENSG00000142207	URB1
16:29996861-29999269:+	Y	Y	-1.01441	4.57239e-08	7.96509e-06	-0.00823776	ENSG00000169592	INO80E
19:14529712-14532528:+	Y	N	-1.27331	4.57847e-08	7.9697e-06	-0.00529451	ENSG00000099797	TECR
17:49636810-49646115:-	Y	Y	-1.38216	4.59508e-08	7.99261e-06	-0.00379822	ENSG00000121067	SPOP
8:9615678-9670118:+	Y	Y	-1.25587	4.61565e-08	8.02239e-06	-0.0176744	ENSG00000173273	TNKS
5:150012354-150018565:+	Y	Y	-1.39318	4.63759e-08	8.05448e-06	-0.0151407	ENSG00000113716	HMGXB3
9:4702029-4703085:+	Y	Y	3.45081	4.69492e-08	8.14796e-06	0.467415	ENSG00000106993	CDC37L1
2:128103146-128103931:+	Y	Y	-1.79677	4.71948e-08	8.18446e-06	-0.0263065	ENSG00000136731	UGGT1
3:124114671-124162209:+	Y	Y	-1.67345	4.73249e-08	8.20089e-06	-0.027077	ENSG00000160145	KALRN
22:35752656-35756104:-	Y	Y	-1.17708	4.74288e-08	8.21276e-06	-0.0113226	ENSG00000100320	RBFOX2
18:49390813-49391384:-	Y	Y	-3.03808	4.78909e-08	8.2866e-06	-0.019186	ENSG00000141627	DYM
6:41080898-41084045:+	Y	Y	-1.08063	4.79965e-08	8.29867e-06	-0.013059	ENSG00000001167	NFYA
1:37698978-37700435:+	Y	Y	2.18617	4.82624e-08	8.33844e-06	0.0793534	ENSG00000134690	CDCA8
5:31466487-31467141:-	Y	Y	-1.69451	4.84025e-08	8.35642e-06	-0.0700984	ENSG00000113360	DROSHA
15:50748871-50749635:-	Y	Y	-4.20631	4.85869e-08	8.38202e-06	-0.00967864	ENSG00000138600	SPPL2A
19:49856136-49856503:+	Y	N	-0.915903	4.88601e-08	8.42289e-06	-0.0862473	ENSG00000104960	PTOV1
7:135619889-135622776:+	Y	Y	-1.12072	4.89682e-08	8.43525e-06	-0.00381747	ENSG00000155561	NUP205
6:144827348-144827386:+	Y	N	-4.18634	4.91658e-08	8.46302e-06	-0.650178	ENSG00000152818	UTRN
2:235853203-235883344:+	Y	Y	-1.35246	4.92051e-08	8.4635e-06	-0.00294299	ENSG00000157985	AGAP1
5:87269288-87330937:+	Y	Y	-1.05181	4.93322e-08	8.47908e-06	-0.00610478	ENSG00000145715	RASA1
1:164631117-164641028:+	Y	Y	-1.36849	4.93949e-08	8.48357e-06	-0.0215897	ENSG00000185630	PBX1
2:131053016-131055271:-	Y	Y	-1.43446	4.97539e-08	8.53891e-06	-0.00937519	ENSG00000152102	FAM168B
7:30603573-30604989:+	Y	N	-1.06337	5.00384e-08	8.58139e-06	-0.0066554	ENSG00000106105	GARS1
1:180984772-180987724:-	Y	Y	-1.33007	5.02808e-08	8.61659e-06	-0.0129593	ENSG00000135823	STX6
12:70337821-70338435:+	Y	N	-2.07014	5.06625e-08	8.67559e-06	-0.045255	ENSG00000111596	CNOT2
9:6414169-6420911:+	Y	Y	-1.39949	5.12317e-08	8.76659e-06	-0.0136976	ENSG00000147854	UHRF2
6:72677215-72678353:+	Y	Y	-3.24426	5.12825e-08	8.76882e-06	-0.122217	ENSG00000185760	KCNQ5
17:3020596-3026007:+	Y	Y	-1.71696	5.14025e-08	8.78286e-06	-0.00745415	ENSG00000132359	RAP1GAP2
6:163569542-163570145:+	Y	N	-2.02853	5.22596e-08	8.92274e-06	-0.0371832	ENSG00000112531	QKI
20:36499318-36499321:+	Y	N	2.22897	5.23308e-08	8.92833e-06	0.176421	ENSG00000080845	DLGAP4
11:2983814-2988076:-	Y	Y	-1.24674	5.24359e-08	8.93969e-06	-0.00896296	ENSG00000205531	NAP1L4
6:11565837-11575430:+	Y	Y	-2.16555	5.30473e-08	9.03729e-06	-0.0252059	ENSG00000205269	TMEM170B
1:212072214-212078172:+	Y	Y	-1.00063	5.3144e-08	9.04711e-06	-0.0086045	ENSG00000143476	DTL
8:104531964-104588818:-	Y	Y	-1.88723	5.32402e-08	9.05684e-06	-0.0541761	ENSG00000147650	LRP12
11:113214512-113221295:+	Y	Y	-1.08517	5.328e-08	9.05698e-06	-0.0210068	ENSG00000149294	NCAM1
1:186323871-186325518:-	Y	Y	-1.30012	5.37198e-08	9.12506e-06	-0.00871561	ENSG00000047410	TPR
7:81969985-81970674:-	Y	Y	1.40494	5.38821e-08	9.14593e-06	0.046449	ENSG00000153956	CACNA2D1
4:39045097-39062231:+	Y	Y	-1.92388	5.39824e-08	9.15625e-06	-0.0255746	ENSG00000109790	KLHL5
8:73293343-73293598:-	Y	Y	2.82853	5.41154e-08	9.17211e-06	0.197272	ENSG00000147604	RPL7
2:177213419-177215538:+	Y	Y	-1.35437	5.42496e-08	9.18813e-06	-0.0207809	ENSG00000170144	HNRNPA3
15:57251424-57252198:+	Y	Y	-1.3929	5.43776e-08	9.2031e-06	-0.0161888	ENSG00000140262	TCF12
14:77305775-77305830:-	Y	N	2.2035	5.45655e-08	9.22817e-06	0.270363	ENSG00000009830	POMT2
14:70995926-71009633:+	Y	Y	-1.46769	5.49255e-08	9.28229e-06	-0.0211487	ENSG00000100731	PCNX1
2:180984094-180987337:+	Y	Y	-1.31109	5.50215e-08	9.28499e-06	-0.010388	ENSG00000170035	UBE2E3
12:45975735-45990352:-	Y	Y	-1.07052	5.50041e-08	9.28499e-06	-0.00864285	ENSG00000139218	SCAF11
1:151762955-151762989:-	Y	N	1.87821	5.51225e-08	9.29527e-06	0.157497	ENSG00000143436	MRPL9
6:106629706-106640100:+	Y	Y	-1.56933	5.55015e-08	9.35239e-06	-0.0152494	ENSG00000130348	QRSL1
16:75230024-75233845:-	Y	Y	-1.19863	5.55714e-08	9.35737e-06	-0.00927506	ENSG00000050820	BCAR1
1:183518683-183526595:+	Y	Y	-1.01434	5.58747e-08	9.40161e-06	-0.00553526	ENSG00000116698	SMG7
3:133074359-133080922:+	Y	Y	-1.45243	5.59463e-08	9.40684e-06	-0.0179169	ENSG00000144868	TMEM108
9:133350728-133350912:+	Y	Y	0.851875	5.62105e-08	9.44442e-06	0.0166142	ENSG00000148303	RPL7A
4:145544178-145546076:+	Y	N	-2.11641	5.66061e-08	9.50402e-06	-0.0173745	ENSG00000170365	SMAD1
13:37022318-37023044:-	Y	N	-1.77571	5.69996e-08	9.56316e-06	-0.22554	ENSG00000102710	SUPT20H
7:108237770-108239958:-	Y	Y	-1.28734	5.72265e-08	9.59428e-06	-0.00883294	ENSG00000091129	NRCAM
17:67362893-67366411:-	Y	Y	-0.897631	5.74336e-08	9.62205e-06	-0.00805387	ENSG00000197170	PSMD12
2:131082658-131088962:-	Y	Y	-1.01827	5.76268e-08	9.64745e-06	-0.0075289	ENSG00000152102	FAM168B
10:104259799-104262978:+	Y	Y	-1.10874	5.7761e-08	9.66295e-06	-0.00393875	ENSG00000148834	GSTO1
16:57227454-57230710:+	Y	Y	-1.48168	5.79122e-08	9.68127e-06	-0.0144833	ENSG00000159579	RSPRY1
4:94618192-94640275:+	Y	Y	-1.3726	5.79708e-08	9.68409e-06	-0.00538678	ENSG00000163110	PDLIM5
2:178121360-178123521:+	Y	Y	3.17406	5.8379e-08	9.74526e-06	0.385534	ENSG00000155636	RBM45
7:30355834-30362376:+	Y	Y	-1.58524	5.99357e-08	9.99792e-06	-0.0162706	ENSG00000180233	ZNRF2
3:197071004-197075836:-	Y	Y	-1.07228	6.00169e-08	1.00043e-05	-0.0142465	ENSG00000075711	DLG1
15:44338318-44345874:+	Y	Y	-1.21572	6.01705e-08	1.00227e-05	-0.00794216	ENSG00000166734	GOLM2
14:76196586-76201690:+	Y	Y	-1.1584	6.02592e-08	1.00303e-05	-0.0902503	ENSG00000089916	GPATCH2L
1:66048891-66062893:+	Y	Y	-1.25612	6.06208e-08	1.00832e-05	-0.0537407	ENSG00000184588	PDE4B
7:33568287-33604864:+	Y	Y	-2.46282	6.08615e-08	1.0116e-05	-0.029324	ENSG00000122507	BBS9
4:53428222-53440581:+	Y	Y	-1.32813	6.15161e-08	1.02175e-05	-0.0127082	ENSG00000145216	FIP1L1
17:27308848-27309099:+	Y	N	-2.37307	6.22274e-08	1.0326e-05	-0.0939923	ENSG00000109046	WSB1
22:35840588-35938846:-	Y	Y	-0.875135	6.22586e-08	1.0326e-05	-0.00406344	ENSG00000100320	RBFOX2
6:101881266-101889639:+	Y	Y	-2.10478	6.29812e-08	1.04384e-05	-0.0049596	ENSG00000164418	GRIK2
2:159196794-159198974:+	Y	Y	-1.75557	6.31305e-08	1.04557e-05	-0.0950815	ENSG00000115183	TANC1
2:28760152-28776131:+	Y	Y	-1.17678	6.32264e-08	1.04566e-05	-0.00264997	ENSG00000213639	PPP1CB
6:90062964-90088957:-	Y	Y	-1.59833	6.32066e-08	1.04566e-05	-0.0140318	ENSG00000112182	BACH2
12:31305124-31323943:-	Y	Y	-1.06659	6.34309e-08	1.0483e-05	-0.00711902	ENSG00000139146	SINHCAF
2:207124409-207134066:-	Y	Y	-1.29943	6.35361e-08	1.04929e-05	-0.023641	ENSG00000118263	KLF7
1:243818175-243843124:-	Y	Y	-1.16638	6.44061e-08	1.06215e-05	-0.0106619	ENSG00000117020	AKT3
6:44230332-44230346:+	Y	N	1.56411	6.43646e-08	1.06215e-05	0.22707	ENSG00000112759	SLC29A1
2:101698539-101790719:+	Y	Y	-0.953717	6.45482e-08	1.06298e-05	-0.00616122	ENSG00000071054	MAP4K4
15:57134501-57166401:+	Y	Y	-1.1174	6.45463e-08	1.06298e-05	-0.00373556	ENSG00000140262	TCF12
5:150449492-150449691:-	Y	N	0.595202	6.50382e-08	1.07029e-05	0.0125612	ENSG00000164587	RPS14
1:81985411-81986900:+	Y	Y	-0.999169	6.52323e-08	1.07272e-05	-0.00752758	ENSG00000117114	ADGRL2
13:50927155-50927251:+	Y	N	-3.58194	6.53279e-08	1.07353e-05	-0.0356442	ENSG00000136104	RNASEH2B
12:46207622-46209053:-	Y	Y	-1.37089	6.55388e-08	1.07624e-05	-0.00765986	ENSG00000111371	SLC38A1
3:101686558-101686671:-	Y	N	1.1609	6.56198e-08	1.07681e-05	0.0639485	ENSG00000114391	RPL24
11:113240834-113242804:+	Y	Y	-1.30323	6.57087e-08	1.0775e-05	-0.0163829	ENSG00000149294	NCAM1
12:111555920-111597748:-	Y	Y	-1.43553	6.60716e-08	1.08269e-05	-0.0338323	ENSG00000204842	ATXN2
11:9384848-9392197:+	Y	Y	-0.785394	6.61331e-08	1.08293e-05	-0.00188202	ENSG00000205339	IPO7
2:218514429-218528270:-	Y	Y	-1.4004	6.62936e-08	1.08327e-05	-0.0193722	ENSG00000135913	USP37
4:2625462-2625544:+	Y	N	4.20936	6.62593e-08	1.08327e-05	0.19008	ENSG00000125386	FAM193A
17:66496284-66554518:+	Y	Y	-1.11612	6.62099e-08	1.08327e-05	-0.00586066	ENSG00000154229	PRKCA
11:63681779-63704850:+	Y	Y	-0.992069	6.65081e-08	1.08601e-05	-0.00328972	ENSG00000133318	RTN3
5:140684321-140685338:-	Y	N	-1.21975	6.69065e-08	1.09126e-05	-0.023987	ENSG00000170445	HARS1
15:68146701-68153589:+	Y	Y	1.70743	6.69241e-08	1.09126e-05	0.0319947	ENSG00000033800	PIAS1
21:26022043-26050994:-	Y	Y	-0.78693	6.7028e-08	1.09219e-05	-0.000799795	ENSG00000142192	APP
19:1371480-1372098:+	Y	Y	-1.65655	6.71744e-08	1.09381e-05	-0.122994	ENSG00000160953	PWWP3A
3:40457364-40457474:+	Y	N	0.906481	6.75326e-08	1.09887e-05	0.0750878	ENSG00000188846	RPL14
14:66509403-66551040:+	Y	Y	-1.6987	6.81426e-08	1.10802e-05	-0.0309503	ENSG00000171723	GPHN
21:45516141-45525816:-	Y	Y	-1.29831	6.8472e-08	1.11259e-05	-0.0122513	ENSG00000173638	SLC19A1
21:26090073-26111978:-	Y	Y	-0.993777	6.86248e-08	1.1143e-05	-0.00116409	ENSG00000142192	APP
2:134942770-134945786:+	Y	Y	-1.26929	6.8945e-08	1.11871e-05	-0.0716322	ENSG00000082258	CCNT2
2:37094325-37095436:+	Y	Y	2.83768	6.9222e-08	1.12242e-05	0.171276	ENSG00000152133	GPATCH11
12:65171119-65210925:+	Y	Y	-1.48047	6.94848e-08	1.1259e-05	-0.0100776	ENSG00000174106	LEMD3
16:3813073-3850296:-	Y	Y	-0.909904	7.0016e-08	1.13371e-05	-0.00555786	ENSG00000005339	CREBBP
7:133551753-133576461:+	Y	Y	-1.32153	7.05094e-08	1.14049e-05	-0.00691641	ENSG00000131558	EXOC4
18:36052921-36062977:-	Y	Y	-1.1826	7.05332e-08	1.14049e-05	-0.00628364	ENSG00000141425	RPRD1A
3:122427717-122433660:-	Y	Y	-1.34951	7.06135e-08	1.141e-05	-0.00995152	ENSG00000114030	KPNA1
4:152337937-152346811:-	Y	Y	-1.56566	7.08528e-08	1.14407e-05	-0.0358201	ENSG00000109670	FBXW7
5:171400291-171400785:+	Y	N	1.42277	7.16131e-08	1.15554e-05	0.0286884	ENSG00000181163	NPM1
1:169116324-169122782:+	Y	Y	-0.844363	7.2031e-08	1.15986e-05	-0.00565834	ENSG00000143153	ATP1B1
7:151477416-151484736:-	Y	Y	-0.721365	7.20194e-08	1.15986e-05	-0.00234901	ENSG00000106615	RHEB
8:52645868-52656007:-	Y	Y	1.3584	7.20073e-08	1.15986e-05	0.0374759	ENSG00000023287	RB1CC1
9:33900272-33911963:+	Y	Y	-1.06237	7.22537e-08	1.16264e-05	-0.00437112	ENSG00000107341	UBE2R2
6:13652682-13657108:-	Y	Y	-1.51834	7.26343e-08	1.16796e-05	-0.0151052	ENSG00000010017	RANBP9
7:158799073-158827542:-	Y	Y	-1.29647	7.29787e-08	1.17263e-05	-0.00534865	ENSG00000117868	ESYT2
13:97434785-97441767:+	Y	Y	-1.48227	7.30258e-08	1.17263e-05	-0.0113696	ENSG00000125249	RAP2A
11:123097967-123194912:-	Y	Y	-1.632	7.3241e-08	1.17527e-05	-0.0275869	ENSG00000166250	CLMP
3:37862279-37911672:+	Y	Y	-2.1388	7.38589e-08	1.18437e-05	-0.0310065	ENSG00000144677	CTDSPL
4:95250668-95278258:-	Y	Y	-0.651106	7.42878e-08	1.19042e-05	-0.00400124	ENSG00000182168	UNC5C
3:12004929-12071557:+	Y	Y	-1.90775	7.46435e-08	1.1953e-05	-0.0569614	ENSG00000157152	SYN2
1:114748419-114749816:-	Y	Y	-1.21399	7.47588e-08	1.19632e-05	-0.00349791	ENSG00000009307	CSDE1
18:9915821-9924902:+	Y	Y	-1.21777	7.48559e-08	1.19704e-05	-0.0056077	ENSG00000101558	VAPA
5:171392983-171400152:+	Y	Y	0.909699	7.49836e-08	1.19744e-05	0.00751631	ENSG00000181163	NPM1
11:587465-591383:+	Y	Y	-1.14898	7.49477e-08	1.19744e-05	-0.0230317	ENSG00000070047	PHRF1
16:71751338-71753569:-	Y	Y	-1.69468	7.57919e-08	1.20951e-05	-0.0179882	ENSG00000166747	AP1G1
5:133967460-133968445:-	Y	Y	-1.76326	7.61217e-08	1.21394e-05	-0.0585708	ENSG00000113583	C5orf15
17:31095370-31128457:+	Y	Y	-1.29915	7.62705e-08	1.21548e-05	-0.00937018	ENSG00000196712	NF1
12:27003406-27012709:-	Y	Y	-1.80041	7.64555e-08	1.21759e-05	-0.0107056	ENSG00000064115	TM7SF3
1:183533833-183537144:+	Y	Y	-1.47829	7.65717e-08	1.2186e-05	-0.00630608	ENSG00000116698	SMG7
18:32310324-32331579:-	Y	Y	-1.76724	7.66584e-08	1.21915e-05	-0.0090308	ENSG00000141441	GAREM1
17:82886285-82889667:+	Y	Y	-1.33167	7.70942e-08	1.22524e-05	-0.00263322	ENSG00000141556	TBCD
5:55329408-55340009:+	Y	Y	-1.08932	7.72579e-08	1.227e-05	-0.00615568	ENSG00000039123	MTREX
1:16256760-16292313:-	Y	Y	-1.41574	7.74795e-08	1.22968e-05	-0.0190128	ENSG00000037637	FBXO42
3:136106921-136145042:+	Y	Y	-2.05189	7.80435e-08	1.23778e-05	-0.00995328	ENSG00000073711	PPP2R3A
16:4848394-4852214:+	Y	Y	-1.5327	7.94298e-08	1.25891e-05	-0.0392933	ENSG00000118900	UBN1
3:18436872-18438564:-	Y	Y	-2.13458	7.96162e-08	1.261e-05	-0.0307055	ENSG00000182568	SATB1
14:75737608-75744376:+	Y	Y	-1.69925	7.99436e-08	1.26532e-05	-0.0159946	ENSG00000119685	TTLL5
3:179149717-179196018:+	Y	Y	-1.30454	8.04574e-08	1.27216e-05	-0.0286709	ENSG00000121879	PIK3CA
20:50561454-50564968:+	Y	Y	-1.5515	8.04853e-08	1.27216e-05	-0.00673261	ENSG00000196396	PTPN1
5:180249139-180253506:-	Y	Y	2.01774	8.05596e-08	1.27247e-05	0.0971905	ENSG00000050748	MAPK9
18:9570684-9577063:-	Y	Y	-1.15656	8.07437e-08	1.27451e-05	-0.0100325	ENSG00000154845	PPP4R1
2:167964727-168012633:-	Y	Y	-1.14794	8.16206e-08	1.2866e-05	-0.00672328	ENSG00000198648	STK39
14:55051804-55060361:+	Y	Y	-1.1143	8.16117e-08	1.2866e-05	-0.0289645	ENSG00000168175	MAPK1IP1L
19:42363263-42368454:+	Y	Y	-1.18966	8.17429e-08	1.28765e-05	-0.00976982	ENSG00000105429	MEGF8
9:83686156-83707499:-	Y	Y	-0.806224	8.21058e-08	1.2921e-05	-0.00233295	ENSG00000135018	UBQLN1
13:97357636-97365135:+	Y	Y	-1.24118	8.21363e-08	1.2921e-05	-0.0390622	ENSG00000139793	MBNL2
12:93411300-93424269:-	Y	Y	-0.680576	8.32267e-08	1.30836e-05	-0.00218976	ENSG00000177889	UBE2N
16:84716519-84732467:+	Y	Y	-1.19972	8.43762e-08	1.32554e-05	-0.0115238	ENSG00000103194	USP10
9:117096152-117141325:-	Y	Y	-1.0414	8.50624e-08	1.33474e-05	-0.00172187	ENSG00000148219	ASTN2
X:41086110-41123470:+	Y	Y	-1.56515	8.50772e-08	1.33474e-05	-0.0142133	ENSG00000124486	USP9X
1:182877048-182877417:+	Y	Y	-1.1129	8.52797e-08	1.33701e-05	-0.0310379	ENSG00000135829	DHX9
1:112935997-112955275:-	Y	Y	-1.16031	8.55413e-08	1.34021e-05	-0.00597375	ENSG00000155380	SLC16A1
2:190881471-190895151:+	Y	Y	-1.05648	8.60977e-08	1.34802e-05	-0.0136626	ENSG00000115419	GLS
11:11905549-11920155:+	Y	Y	-1.46282	8.62446e-08	1.34941e-05	-0.0400807	ENSG00000170242	USP47
11:9176772-9176902:-	Y	N	3.04777	8.63765e-08	1.35056e-05	0.457078	ENSG00000184014	DENND5A
12:71524478-71535114:+	Y	Y	-1.51247	8.66007e-08	1.35315e-05	-0.00939188	ENSG00000139292	LGR5
12:49500206-49512861:+	Y	Y	-0.947082	8.68635e-08	1.35635e-05	-0.00987639	ENSG00000123352	SPATS2
4:44688147-44689285:+	Y	Y	-1.71174	8.70737e-08	1.35871e-05	-0.0446387	ENSG00000151806	GUF1
8:102850166-102858012:-	Y	Y	-0.829595	8.76057e-08	1.36518e-05	-0.00366207	ENSG00000155096	AZIN1
18:58932516-58934231:+	Y	Y	-1.52793	8.75615e-08	1.36518e-05	-0.0224727	ENSG00000074657	ZNF532
1:243844211-243849594:-	Y	Y	-1.33767	8.78821e-08	1.36857e-05	-0.0123783	ENSG00000117020	AKT3
19:2228383-2229784:+	Y	Y	-1.24272	8.85302e-08	1.37773e-05	-0.132171	ENSG00000104885	DOT1L
1:161864741-161865955:+	Y	N	-1.73305	8.86528e-08	1.37779e-05	-0.0168275	ENSG00000118217	ATF6
22:28721632-28724564:-	Y	Y	2.97112	8.85986e-08	1.37779e-05	0.250619	ENSG00000183765	CHEK2
1:39572587-39575095:-	Y	N	-0.973619	8.88447e-08	1.37985e-05	-0.00732746	ENSG00000090621	PABPC4
3:124184810-124227989:+	Y	Y	-1.76991	8.90773e-08	1.38254e-05	-0.0111419	ENSG00000160145	KALRN
8:38240368-38241964:+	Y	Y	-1.56306	8.93877e-08	1.38643e-05	-0.0264084	ENSG00000085788	DDHD2
X:153960415-153961541:-	Y	Y	-0.769423	8.95921e-08	1.38867e-05	-0.0299344	ENSG00000172534	HCFC1
19:55675436-55675970:+	Y	Y	-1.34051	8.97429e-08	1.39008e-05	-0.0168783	ENSG00000063245	EPN1
11:73873745-73874420:-	Y	Y	-1.13867	9.01729e-08	1.39581e-05	-0.0259136	ENSG00000181924	COA4
4:76176252-76176436:-	Y	Y	-2.1175	9.02974e-08	1.3968e-05	-0.0199147	ENSG00000138760	SCARB2
2:66435869-66436895:+	Y	Y	-1.19806	9.0372e-08	1.39703e-05	-0.0308381	ENSG00000143995	MEIS1
5:115241607-115252830:-	Y	Y	-1.33351	9.05158e-08	1.39832e-05	-0.0147324	ENSG00000164219	PGGT1B
15:67580824-67585741:+	Y	Y	-1.6128	9.16879e-08	1.41548e-05	-0.0158989	ENSG00000137764	MAP2K5
8:140405699-140426614:-	Y	Y	-1.56761	9.20619e-08	1.42031e-05	-0.0045859	ENSG00000167632	TRAPPC9
7:149166931-149176467:+	Y	Y	-1.44036	9.26898e-08	1.42905e-05	-0.0209263	ENSG00000197024	ZNF398
3:12587979-12589894:-	Y	N	-1.13773	9.28245e-08	1.43018e-05	-0.0134023	ENSG00000132155	RAF1
1:243741808-243788701:-	Y	Y	-1.17154	9.33153e-08	1.43678e-05	-0.00687533	ENSG00000117020	AKT3
6:44230112-44230331:+	Y	N	1.19135	9.38576e-08	1.44417e-05	0.172066	ENSG00000112759	SLC29A1
11:100840672-100859360:+	Y	Y	-1.67309	9.4251e-08	1.44927e-05	-0.0105182	ENSG00000165895	ARHGAP42
2:43982435-43989548:-	Y	Y	-1.38083	9.50226e-08	1.45989e-05	-0.00563797	ENSG00000138095	LRPPRC
15:56921099-57001348:+	Y	Y	-1.20184	9.51309e-08	1.45989e-05	-0.00799251	ENSG00000140262	TCF12
17:49322509-49361908:-	Y	Y	-1.4471	9.50816e-08	1.45989e-05	-0.046462	ENSG00000198740	ZNF652
17:61693513-61715950:-	Y	Y	-1.12373	9.54456e-08	1.46376e-05	-0.0072998	ENSG00000136492	BRIP1
5:144162400-144163862:-	Y	Y	-1.36937	9.58692e-08	1.46895e-05	-0.0149997	ENSG00000145817	YIPF5
11:61849801-61854186:+	Y	Y	-0.74578	9.5911e-08	1.46895e-05	-0.00519452	ENSG00000134824	FADS2
1:31932701-31935588:-	Y	Y	-1.57391	9.64735e-08	1.47562e-05	-0.00583328	ENSG00000184007	PTP4A2
7:44798905-44799246:+	Y	N	-0.795707	9.64179e-08	1.47562e-05	-0.019924	ENSG00000196262	PPIA
1:216568099-216650972:-	Y	Y	-1.18321	9.67803e-08	1.47934e-05	-0.0238523	ENSG00000196482	ESRRG
1:197268483-197328421:+	Y	Y	-2.573	9.698e-08	1.48141e-05	-0.269224	ENSG00000134376	CRB1
17:42998472-42998689:+	Y	N	1.58395	9.73755e-08	1.48648e-05	0.196314	ENSG00000131469	RPL27
2:47164220-47167475:-	Y	Y	-1.10482	9.80245e-08	1.4954e-05	-0.00207154	ENSG00000143933	CALM2
4:53440984-53442252:+	Y	Y	-1.9655	9.82914e-08	1.49849e-05	-0.0232645	ENSG00000145216	FIP1L1
20:38518001-38521496:+	Y	Y	-1.37965	9.85045e-08	1.50075e-05	-0.0150775	ENSG00000170471	RALGAPB
12:68713809-68714378:+	Y	N	-1.43923	9.98729e-08	1.5206e-05	-0.0387834	ENSG00000111581	NUP107
8:9772424-9776649:+	Y	Y	-1.18284	9.99853e-08	1.52131e-05	-0.0128887	ENSG00000173273	TNKS
12:79872939-79913796:-	Y	Y	-1.53574	1.00164e-07	1.52303e-05	-0.0168091	ENSG00000058272	PPP1R12A
X:46837203-46853475:+	Y	Y	-1.51955	1.00236e-07	1.52312e-05	-0.00647197	ENSG00000102218	RP2
19:46839657-46845650:-	Y	Y	-0.957837	1.00665e-07	1.52865e-05	-0.000855074	ENSG00000042753	AP2S1
X:132758333-132956807:-	Y	Y	-1.47117	1.01138e-07	1.53482e-05	-0.00491928	ENSG00000171004	HS6ST2
13:110901078-110903474:-	Y	Y	-1.3231	1.02051e-07	1.54703e-05	-0.111637	ENSG00000088448	ANKRD10
19:3976748-3977214:-	Y	Y	-0.661134	1.02076e-07	1.54703e-05	-0.00527038	ENSG00000167658	EEF2
2:134270551-134317528:+	Y	Y	-1.0131	1.02419e-07	1.55121e-05	-0.00708954	ENSG00000152127	MGAT5
5:150535886-150539227:+	Y	Y	-1.11282	1.03708e-07	1.56972e-05	-0.00868563	ENSG00000070614	NDST1
11:43444506-43445930:+	Y	Y	-1.55334	1.04242e-07	1.57677e-05	-0.0362951	ENSG00000052841	TTC17
2:202231733-202233577:-	Y	Y	-1.42404	1.04569e-07	1.58069e-05	-0.0101619	ENSG00000116030	SUMO1
18:28013910-28036469:-	Y	Y	-1.20527	1.05462e-07	1.59211e-05	-0.00174946	ENSG00000170558	CDH2
18:51192910-51196566:-	Y	N	-1.22895	1.05425e-07	1.59211e-05	-0.0389806	ENSG00000176624	MEX3C
1:100878448-100885597:-	Y	Y	-0.9862	1.05587e-07	1.59296e-05	-0.0166575	ENSG00000162694	EXTL2
1:154208518-154211733:-	Y	Y	-0.755724	1.0571e-07	1.59378e-05	-0.00361537	ENSG00000143612	C1orf43
7:158316933-158489734:-	Y	Y	-1.45731	1.06177e-07	1.59979e-05	-0.00789192	ENSG00000155093	PTPRN2
10:126019826-126036145:-	Y	Y	-2.06732	1.06427e-07	1.60188e-05	-0.00630819	ENSG00000148848	ADAM12
17:81597320-81600340:-	Y	Y	-1.13769	1.06454e-07	1.60188e-05	-0.00815718	ENSG00000182446	NPLOC4
8:102329400-102342472:-	Y	Y	-1.29965	1.06633e-07	1.60353e-05	-0.0103307	ENSG00000104517	UBR5
3:23532702-23589733:+	Y	Y	-1.42738	1.06976e-07	1.60765e-05	-0.00370382	ENSG00000182247	UBE2E2
1:30953982-30964673:-	Y	Y	-1.18816	1.0722e-07	1.61027e-05	-0.0213991	ENSG00000134644	PUM1
5:37727046-37752485:+	Y	Y	-1.26227	1.07385e-07	1.61171e-05	-0.00637829	ENSG00000082068	WDR70
6:151022356-151034492:+	Y	Y	-1.31258	1.0757e-07	1.61343e-05	-0.00387591	ENSG00000120254	MTHFD1L
1:162761455-162766000:+	Y	Y	-1.25606	1.08583e-07	1.62758e-05	-0.0262037	ENSG00000162733	DDR2
3:172148571-172184244:+	Y	Y	-1.54202	1.09653e-07	1.64256e-05	-0.0126228	ENSG00000075420	FNDC3B
3:160756708-160842212:+	Y	Y	-1.7573	1.09915e-07	1.64542e-05	-0.0340448	ENSG00000163590	PPM1L
8:30078257-30082228:-	Y	Y	-1.62355	1.10236e-07	1.64916e-05	-0.00329041	ENSG00000133872	SARAF
20:35739548-35740098:-	Y	N	-1.51529	1.1041e-07	1.6507e-05	-0.160895	ENSG00000131051	RBM39
1:246862154-246863923:-	Y	Y	-1.64232	1.10832e-07	1.65594e-05	-0.0159979	ENSG00000153207	AHCTF1
1:241498738-241500436:-	Y	N	-1.38336	1.11197e-07	1.65977e-05	-0.00665442	ENSG00000091483	FH
4:168904262-168913926:+	Y	Y	-1.11624	1.11322e-07	1.65977e-05	-0.00449349	ENSG00000129116	PALLD
10:16593497-16695022:-	Y	Y	-1.22386	1.11293e-07	1.65977e-05	-0.00282307	ENSG00000148484	RSU1
14:88834007-88836907:+	Y	Y	-1.00338	1.11374e-07	1.65977e-05	-0.0420948	ENSG00000165533	TTC8
18:49492306-49492399:-	Y	N	2.08489	1.11669e-07	1.6631e-05	0.336879	ENSG00000265681	RPL17
7:11040776-11042679:+	Y	Y	-1.1202	1.11846e-07	1.66466e-05	-0.0228155	ENSG00000106443	PHF14
1:84498549-84501825:-	Y	N	-0.87404	1.11982e-07	1.66562e-05	-0.00275738	ENSG00000174021	GNG5
15:44289357-44307237:+	Y	Y	-1.07573	1.12424e-07	1.67113e-05	-0.00332513	ENSG00000166734	GOLM2
2:238069837-238073782:+	Y	Y	-1.27788	1.13878e-07	1.69056e-05	-0.0238237	ENSG00000132330	SCLY
5:124666428-124701013:-	Y	Y	-1.03046	1.1382e-07	1.69056e-05	-0.0200461	ENSG00000168916	ZNF608
1:46299891-46300780:-	Y	N	-1.34583	1.14555e-07	1.69845e-05	-0.0420171	ENSG00000132128	LRRC41
6:112081208-112083915:-	Y	Y	-1.79649	1.14516e-07	1.69845e-05	-0.0543273	ENSG00000074935	TUBE1
13:73715526-73764937:-	Y	Y	-0.945859	1.14715e-07	1.69973e-05	-0.00584638	ENSG00000118922	KLF12
X:7085472-7105619:-	Y	Y	-1.2545	1.15703e-07	1.71327e-05	-0.012296	ENSG00000130021	PUDP
4:94758069-94875830:+	Y	Y	-1.48799	1.15796e-07	1.71356e-05	-0.030625	ENSG00000138696	BMPR1B
16:53937890-53956682:+	Y	Y	-1.21196	1.16102e-07	1.71699e-05	-0.0155542	ENSG00000140718	FTO
11:74225257-74230244:+	Y	Y	-1.28515	1.16292e-07	1.71871e-05	-0.00333187	ENSG00000214517	PPME1
10:45459740-45459877:-	N	N	3.02615	1.16853e-07	1.7259e-05	0.293239	ENSG00000165406	MARCHF8
7:50504060-50527668:-	Y	Y	-1.26235	1.18598e-07	1.75056e-05	-0.00429559	ENSG00000132437	DDC
1:70231548-70231858:+	Y	N	-1.01135	1.18886e-07	1.7537e-05	-0.0543941	ENSG00000116754	SRSF11
2:121418730-121425138:-	Y	Y	-1.3334	1.19103e-07	1.75467e-05	-0.0126866	ENSG00000074054	CLASP1
11:93732977-93733086:-	Y	N	-1.93137	1.19034e-07	1.75467e-05	-0.20915	ENSG00000166012	TAF1D
4:1843212-1846473:-	Y	Y	-1.38194	1.19382e-07	1.75766e-05	-0.00710106	ENSG00000168924	LETM1
2:55010087-55010449:-	Y	N	-2.23909	1.2059e-07	1.77432e-05	-0.00688473	ENSG00000115310	RTN4
17:31299607-31314304:+	Y	Y	-1.36978	1.20876e-07	1.7774e-05	-0.0151162	ENSG00000196712	NF1
7:99121204-99143725:-	Y	Y	-1.22632	1.23195e-07	1.81035e-05	-0.0115341	ENSG00000198742	SMURF1
X:101148162-101161527:+	Y	Y	1.96599	1.23386e-07	1.81201e-05	0.154616	ENSG00000102384	CENPI
8:93702165-93702383:+	Y	N	-3.3609	1.25589e-07	1.84319e-05	-0.134875	ENSG00000188343	CIBAR1
14:65669481-65721774:+	Y	Y	-1.38988	1.25888e-07	1.84641e-05	-0.00324957	ENSG00000033170	FUT8
1:161124527-161130814:-	Y	Y	-1.01651	1.26898e-07	1.86005e-05	-0.0103006	ENSG00000158796	DEDD
1:173867155-173867689:-	Y	N	0.98448	1.27137e-07	1.86238e-05	0.0707239	ENSG00000234741	GAS5
9:69734259-69741515:-	Y	Y	-1.539	1.27323e-07	1.86393e-05	-0.00964028	ENSG00000188647	PTAR1
1:246355336-246417295:-	Y	Y	-1.57896	1.27553e-07	1.86612e-05	-0.00703402	ENSG00000185420	SMYD3
15:28895610-28919366:+	Y	Y	-0.976738	1.28336e-07	1.87639e-05	-0.00229098	ENSG00000034053	APBA2
3:120598215-120600949:+	Y	Y	-1.29425	1.28439e-07	1.87671e-05	-0.00436009	ENSG00000065518	NDUFB4
10:87952260-87957581:+	Y	Y	-1.06178	1.28598e-07	1.87785e-05	-0.00891693	ENSG00000171862	PTEN
1:83952388-83998930:-	Y	Y	-1.66565	1.29131e-07	1.88446e-05	-0.0399638	ENSG00000137941	TTLL7
14:96537061-96537901:+	Y	N	-1.19801	1.30047e-07	1.89663e-05	-0.0379181	ENSG00000090060	PAPOLA
17:75973786-75978466:-	Y	Y	-1.26279	1.30447e-07	1.90126e-05	-0.0137762	ENSG00000161533	ACOX1
14:69429458-69441831:+	Y	Y	-0.91761	1.31221e-07	1.91135e-05	-0.00426114	ENSG00000029364	SLC39A9
10:119174773-119177020:-	Y	Y	-0.986934	1.31734e-07	1.91761e-05	-0.00832615	ENSG00000165672	PRDX3
17:4331924-4335208:-	Y	Y	-1.5048	1.33036e-07	1.93535e-05	-0.00626834	ENSG00000132388	UBE2G1
1:1818387-1821124:-	Y	Y	-1.2821	1.33275e-07	1.93762e-05	-0.0021007	ENSG00000078369	GNB1
X:103685261-103685505:-	Y	N	-1.38793	1.3362e-07	1.94142e-05	-0.0189664	ENSG00000123562	MORF4L2
18:49492400-49492409:-	Y	N	1.94045	1.33741e-07	1.94195e-05	0.312624	ENSG00000265681	RPL17
1:220551302-220576645:+	Y	Y	-1.72482	1.33864e-07	1.94229e-05	-0.00999447	ENSG00000116141	MARK1
19:5654201-5654367:+	Y	Y	2.00657	1.33931e-07	1.94229e-05	0.106328	ENSG00000160633	SAFB
7:117138533-117170861:+	Y	Y	-1.3311	1.34292e-07	1.9459e-05	-0.0110923	ENSG00000004866	ST7
9:13186387-13188783:-	Y	Y	-1.46388	1.34348e-07	1.9459e-05	-0.0193062	ENSG00000107186	MPDZ
10:119580539-119580782:-	Y	N	-1.31402	1.34522e-07	1.9472e-05	-0.0613591	ENSG00000151923	TIAL1
10:32048552-32055847:-	Y	Y	-0.771885	1.34634e-07	1.94761e-05	-0.0031729	ENSG00000170759	KIF5B
3:58953822-58992507:-	Y	Y	-2.09261	1.34839e-07	1.94937e-05	-0.0162951	ENSG00000163689	CFAP20DC
3:177195665-177196339:-	Y	Y	-1.32507	1.35428e-07	1.95448e-05	-0.0250253	ENSG00000177565	TBL1XR1
13:97441851-97464204:+	Y	Y	-1.47439	1.35311e-07	1.95448e-05	-0.00622819	ENSG00000125249	RAP2A
18:32331671-32392894:-	Y	Y	-1.45324	1.35446e-07	1.95448e-05	-0.0158181	ENSG00000141441	GAREM1
7:23431304-23467771:-	Y	Y	-0.892944	1.35576e-07	1.95514e-05	-0.0126083	ENSG00000136231	IGF2BP3
2:213297358-213302512:+	Y	Y	-1.6479	1.35916e-07	1.95883e-05	-0.0470535	ENSG00000144451	SPAG16
2:73408748-73419122:+	Y	Y	-1.68469	1.36157e-07	1.95986e-05	-0.0156676	ENSG00000116127	ALMS1
11:95786275-95786805:-	Y	N	-2.5677	1.36109e-07	1.95986e-05	-0.075517	ENSG00000077458	FAM76B
12:122079267-122127255:+	Y	Y	-1.61067	1.36434e-07	1.96263e-05	-0.0257689	ENSG00000175727	MLXIP
5:72107716-72115697:+	Y	Y	-0.885703	1.37465e-07	1.9738e-05	-0.00195791	ENSG00000131711	MAP1B
11:3368856-3369240:-	Y	Y	-1.48712	1.37324e-07	1.9738e-05	-0.102004	ENSG00000005801	ZNF195
18:49491730-49491735:-	Y	N	1.22466	1.37389e-07	1.9738e-05	0.156418	ENSG00000265681	RPL17
1:182842678-182843293:+	Y	Y	-1.05469	1.38249e-07	1.98382e-05	-0.00923753	ENSG00000135829	DHX9
1:220789236-220790862:+	Y	Y	-1.65313	1.39057e-07	1.99419e-05	-0.025389	ENSG00000186205	MTARC1
7:133938070-133997491:+	Y	Y	-1.14847	1.39507e-07	1.99941e-05	-0.0024148	ENSG00000131558	EXOC4
8:28784001-28787828:-	Y	Y	1.56082	1.4118e-07	2.02214e-05	0.0336634	ENSG00000104299	INTS9
15:99690429-99703361:+	Y	Y	-1.71331	1.4154e-07	2.02605e-05	-0.0387602	ENSG00000068305	MEF2A
9:92289427-92290835:-	Y	Y	-1.95591	1.42687e-07	2.0412e-05	-0.0154057	ENSG00000196305	IARS1
4:185593936-185594563:-	Y	Y	-4.14767	1.43213e-07	2.04746e-05	-0.087047	ENSG00000154556	SORBS2
11:85660598-85661636:-	Y	N	-1.96578	1.43337e-07	2.04797e-05	-0.304164	ENSG00000137504	CREBZF
8:73292798-73292881:-	Y	Y	1.8865	1.44459e-07	2.06273e-05	0.185166	ENSG00000147604	RPL7
7:140382597-140398415:-	Y	Y	-1.22337	1.44585e-07	2.06326e-05	-0.00842361	ENSG00000157800	SLC37A3
22:28030367-28094079:-	Y	Y	-1.40826	1.45094e-07	2.06926e-05	-0.00514705	ENSG00000100154	TTC28
X:30871803-30889113:-	Y	Y	-1.72927	1.45854e-07	2.07882e-05	-0.0226027	ENSG00000157625	TAB3
1:22087264-22089942:+	Y	N	-1.02213	1.46263e-07	2.08209e-05	-0.00259554	ENSG00000070831	CDC42
2:202635789-202695880:+	Y	Y	-1.2313	1.4626e-07	2.08209e-05	-0.00724021	ENSG00000138439	FAM117B
5:6625670-6631872:-	Y	Y	-0.909806	1.4725e-07	2.09486e-05	-0.00987683	ENSG00000037474	NSUN2
2:65239963-65241971:+	Y	Y	-1.50501	1.47373e-07	2.09531e-05	-0.00866726	ENSG00000138071	ACTR2
2:15190404-15218772:-	Y	Y	-1.50345	1.4761e-07	2.09739e-05	-0.0100662	ENSG00000151779	NBAS
9:72360788-72363469:-	Y	Y	-1.30451	1.47856e-07	2.09961e-05	-0.0509872	ENSG00000107372	ZFAND5
1:164821627-164831470:+	Y	Y	-1.39181	1.48006e-07	2.10046e-05	-0.00579666	ENSG00000185630	PBX1
5:76132331-76194918:+	Y	Y	-1.57813	1.48208e-07	2.10203e-05	-0.0134964	ENSG00000122012	SV2C
10:86756920-86838861:+	Y	Y	-1.47994	1.48615e-07	2.10652e-05	-0.0289842	ENSG00000107779	BMPR1A
9:129828253-129828427:-	Y	Y	3.81482	1.48728e-07	2.10684e-05	0.266143	ENSG00000136819	C9orf78
8:22247221-22247264:+	Y	N	-4.20614	1.50135e-07	2.12547e-05	-0.108385	ENSG00000168495	POLR3D
16:68321426-68321462:+	Y	N	-3.27552	1.50865e-07	2.13451e-05	-0.269392	ENSG00000132600	PRMT7
11:85978094-85978715:-	Y	N	-1.92587	1.51192e-07	2.13782e-05	-0.0255755	ENSG00000073921	PICALM
5:72186755-72193277:+	Y	Y	-1.17039	1.5143e-07	2.13988e-05	-0.00161947	ENSG00000131711	MAP1B
4:150321384-150325808:-	Y	Y	-1.52113	1.52082e-07	2.14779e-05	-0.0142139	ENSG00000198589	LRBA
8:58808270-58815337:-	Y	Y	-1.35426	1.52425e-07	2.15132e-05	-0.017888	ENSG00000198846	TOX
2:174837337-174846308:-	Y	Y	-1.09238	1.53488e-07	2.16501e-05	-0.00388907	ENSG00000128656	CHN1
11:86003779-86007368:-	Y	Y	-1.2943	1.53613e-07	2.16545e-05	-0.00791451	ENSG00000073921	PICALM
1:8624381-8655972:-	Y	Y	-1.03313	1.54127e-07	2.17077e-05	-0.00674635	ENSG00000142599	RERE
2:148178794-148196207:+	Y	Y	-1.44901	1.54177e-07	2.17077e-05	-0.0109896	ENSG00000204406	MBD5
11:31433756-31437075:-	Y	Y	-1.71708	1.54407e-07	2.17269e-05	-0.00685454	ENSG00000148950	IMMP1L
9:97501804-97524140:+	Y	Y	-1.00163	1.54905e-07	2.17837e-05	-0.0133697	ENSG00000136842	TMOD1
1:169477758-169485562:-	Y	Y	-1.51576	1.57096e-07	2.20785e-05	-0.0449091	ENSG00000117479	SLC19A2
2:203383322-203391043:+	Y	Y	-1.09506	1.57732e-07	2.21544e-05	-0.00662658	ENSG00000138443	ABI2
3:160400966-160401914:+	Y	Y	-0.74694	1.58513e-07	2.22507e-05	-0.0269684	ENSG00000113810	SMC4
1:212319546-212329134:+	Y	Y	-1.80924	1.58752e-07	2.22708e-05	-0.0051297	ENSG00000066027	PPP2R5A
1:70221840-70222765:+	Y	Y	-0.976148	1.59403e-07	2.2335e-05	-0.0230091	ENSG00000116754	SRSF11
9:36357943-36369718:-	Y	Y	-1.38097	1.59348e-07	2.2335e-05	-0.0126574	ENSG00000137075	RNF38
2:182732738-182735352:+	Y	Y	-1.56021	1.59604e-07	2.23497e-05	-0.00841091	ENSG00000077232	DNAJC10
18:49492434-49492444:-	Y	N	1.48018	1.60284e-07	2.24315e-05	0.173876	ENSG00000265681	RPL17
1:225786862-225786969:+	Y	N	0.835276	1.60399e-07	2.24341e-05	0.142975	ENSG00000143742	SRP9
12:123350442-123364700:-	Y	Y	-1.40015	1.61006e-07	2.25054e-05	-0.0308479	ENSG00000139697	SBNO1
18:9513290-9516844:+	Y	Y	2.00266	1.61386e-07	2.25449e-05	0.0133397	ENSG00000017797	RALBP1
1:61385925-61399375:+	Y	Y	-1.38348	1.62681e-07	2.27121e-05	-0.00818639	ENSG00000162599	NFIA
4:84733610-84735042:-	Y	Y	-2.06663	1.63093e-07	2.27559e-05	-0.0641841	ENSG00000163625	WDFY3
12:50006637-50016630:-	Y	Y	-0.88494	1.63717e-07	2.28293e-05	-0.00943093	ENSG00000161800	RACGAP1
7:74711110-74714856:+	Y	Y	-0.989055	1.64047e-07	2.28615e-05	-0.00271432	ENSG00000263001	GTF2I
14:65084300-65093497:-	Y	Y	-1.32394	1.65678e-07	2.30689e-05	-0.0139471	ENSG00000125952	MAX
17:38755991-38760384:+	Y	Y	-0.953063	1.65734e-07	2.30689e-05	-0.00164501	ENSG00000277791	PSMB3
10:58227140-58237719:-	Y	Y	-1.57339	1.66537e-07	2.31668e-05	-0.0188823	ENSG00000151151	IPMK
13:19960027-19965219:+	Y	Y	-1.12449	1.6669e-07	2.31742e-05	-0.0128245	ENSG00000121741	ZMYM2
18:51067188-51076637:+	Y	Y	-1.18578	1.67173e-07	2.32274e-05	-0.00987698	ENSG00000141646	SMAD4
1:239719655-239787121:+	Y	Y	-0.974064	1.67839e-07	2.32921e-05	-0.016946	ENSG00000133019	CHRM3
20:37228745-37229869:+	Y	Y	-0.789888	1.67785e-07	2.32921e-05	-0.0122788	ENSG00000118705	RPN2
2:101867856-101868028:+	Y	N	-1.25598	1.68592e-07	2.33711e-05	-0.069367	ENSG00000071054	MAP4K4
6:75621532-75621625:+	Y	N	2.44894	1.6871e-07	2.33711e-05	0.120404	ENSG00000112701	SENP6
18:55461116-55464075:-	Y	Y	-1.01991	1.6871e-07	2.33711e-05	-0.00420979	ENSG00000196628	TCF4
8:86551513-86554850:+	Y	Y	-1.46899	1.68965e-07	2.33923e-05	-0.0077865	ENSG00000085719	CPNE3
16:58556847-58556861:-	Y	N	-1.50223	1.69399e-07	2.34384e-05	-0.216219	ENSG00000125107	CNOT1
7:96146697-96166921:-	Y	Y	-1.10905	1.70041e-07	2.35133e-05	-0.00495462	ENSG00000004864	SLC25A13
17:3647605-3648846:+	Y	Y	1.80852	1.70576e-07	2.35732e-05	0.134861	ENSG00000040531	CTNS
12:131979794-131981488:+	Y	Y	-1.49484	1.70737e-07	2.35814e-05	-0.0440673	ENSG00000183495	EP400
11:103235814-103236429:+	Y	Y	2.75874	1.714e-07	2.36448e-05	0.313153	ENSG00000187240	DYNC2H1
11:117300738-117315534:-	Y	Y	-1.66003	1.7136e-07	2.36448e-05	-0.0205468	ENSG00000186318	BACE1
X:129511984-129515686:-	Y	Y	1.14162	1.71539e-07	2.365e-05	0.0182686	ENSG00000102038	SMARCA1
4:48378061-48379689:+	Y	Y	-1.66101	1.71959e-07	2.36937e-05	-0.0141992	ENSG00000109171	SLAIN2
7:92623087-92671234:-	Y	Y	-1.01151	1.72091e-07	2.3698e-05	-0.00500675	ENSG00000105810	CDK6
7:66930869-66941847:+	Y	Y	-1.53325	1.72504e-07	2.37267e-05	-0.0222254	ENSG00000106609	TMEM248
12:2861413-2863748:-	Y	Y	0.883992	1.72416e-07	2.37267e-05	0.0185104	ENSG00000111206	FOXM1
12:15323079-15358504:+	Y	Y	-1.66982	1.72931e-07	2.37713e-05	-0.0180647	ENSG00000151490	PTPRO
8:116866992-116874101:-	Y	Y	-1.03323	1.73648e-07	2.38526e-05	-0.00335994	ENSG00000164754	RAD21
17:67361095-67361261:-	Y	N	-1.90771	1.73728e-07	2.38526e-05	-0.031956	ENSG00000197170	PSMD12
4:3520230-3523392:-	Y	Y	1.45814	1.74042e-07	2.38816e-05	0.064207	ENSG00000163956	LRPAP1
18:47886924-47895266:-	Y	Y	-1.15335	1.75704e-07	2.40953e-05	-0.00556833	ENSG00000175387	SMAD2
21:39347114-39347146:-	Y	N	-1.57185	1.76316e-07	2.4165e-05	-0.0481967	ENSG00000205581	HMGN1
1:198256532-198262574:+	Y	Y	-1.6789	1.79057e-07	2.45043e-05	-0.0200694	ENSG00000151414	NEK7
3:116086562-116444876:-	Y	Y	-1.57894	1.78907e-07	2.45043e-05	-0.0219752	ENSG00000185565	LSAMP
17:63155227-63193990:+	Y	Y	-1.21945	1.79108e-07	2.45043e-05	-0.00426656	ENSG00000170921	TANC2
8:26627941-26634779:+	Y	Y	-0.896178	1.79649e-07	2.45637e-05	-0.00347025	ENSG00000092964	DPYSL2
6:13644730-13652658:-	Y	Y	-1.1348	1.80247e-07	2.46165e-05	-0.00963108	ENSG00000010017	RANBP9
11:34457848-34460732:+	Y	Y	-1.6599	1.80197e-07	2.46165e-05	-0.030976	ENSG00000121691	CAT
7:139293464-139293626:+	Y	Y	2.50629	1.80999e-07	2.47046e-05	0.159866	ENSG00000157741	UBN2
9:79709700-79717996:+	Y	Y	-1.08081	1.82612e-07	2.49101e-05	-0.0100875	ENSG00000106829	TLE4
16:29919670-29919757:-	Y	N	-2.42734	1.83178e-07	2.49727e-05	-0.322285	ENSG00000174943	KCTD13
17:75841002-75841032:-	Y	N	2.34052	1.8342e-07	2.49909e-05	0.128535	ENSG00000092929	UNC13D
3:150562661-150562908:+	Y	N	-2.75585	1.85411e-07	2.5207e-05	-0.0140863	ENSG00000144895	EIF2A
7:140824399-140833968:-	Y	Y	-1.23896	1.8544e-07	2.5207e-05	-0.0328311	ENSG00000157764	BRAF
12:12203401-12244261:-	Y	Y	-1.31491	1.85229e-07	2.5207e-05	-0.0111397	ENSG00000070018	LRP6
19:21378311-21378628:+	Y	N	-2.26146	1.85198e-07	2.5207e-05	-0.244961	ENSG00000172687	ZNF738
1:180836717-180863707:+	Y	Y	-0.977305	1.86073e-07	2.52782e-05	-0.00243138	ENSG00000143324	XPR1
16:80988597-80991753:-	Y	Y	-1.27771	1.86281e-07	2.52918e-05	-0.0094581	ENSG00000103121	CMC2
11:73704216-73707419:-	Y	Y	-1.29988	1.86498e-07	2.53064e-05	-0.00637423	ENSG00000175582	RAB6A
1:156015074-156018131:-	Y	Y	-0.859262	1.86971e-07	2.53557e-05	-0.00102886	ENSG00000163479	SSR2
9:117141479-117214357:-	Y	Y	-1.41063	1.87816e-07	2.54488e-05	-0.00521587	ENSG00000148219	ASTN2
19:4418077-4422565:+	Y	Y	1.96947	1.87877e-07	2.54488e-05	0.191834	ENSG00000167670	CHAF1A
11:35685337-35724255:+	Y	Y	-0.841574	1.89045e-07	2.5592e-05	-0.00164967	ENSG00000166326	TRIM44
11:44096322-44103706:+	Y	Y	-1.50233	1.89165e-07	2.5592e-05	-0.0149194	ENSG00000151348	EXT2
X:71911368-72009345:+	Y	Y	-2.15142	1.89265e-07	2.5592e-05	-0.0896475	ENSG00000204131	NHSL2
2:207534684-207550260:+	Y	Y	-1.38366	1.89893e-07	2.5662e-05	-0.0142346	ENSG00000118260	CREB1
17:16087346-16091563:-	Y	Y	-1.17131	1.90802e-07	2.57698e-05	-0.0120103	ENSG00000141027	NCOR1
13:20034405-20036736:+	Y	Y	-1.08926	1.91483e-07	2.58468e-05	-0.0122298	ENSG00000121741	ZMYM2
2:3214453-3257298:-	Y	Y	-1.12074	1.91771e-07	2.58588e-05	-0.00706548	ENSG00000032389	EIPR1
9:120866966-120868259:-	Y	Y	1.39271	1.91795e-07	2.58588e-05	0.128525	ENSG00000119403	PHF19
11:77455938-77473408:-	Y	Y	-1.75162	1.92005e-07	2.5872e-05	-0.0277082	ENSG00000149269	PAK1
3:158110605-158122102:+	Y	Y	-1.46282	1.92509e-07	2.59098e-05	-0.0192464	ENSG00000174891	RSRC1
8:76708259-76776387:+	Y	Y	-1.27149	1.92408e-07	2.59098e-05	-0.0125215	ENSG00000091656	ZFHX4
10:5412821-5426654:+	Y	Y	-1.34075	1.9273e-07	2.59246e-05	-0.0041147	ENSG00000173848	NET1
15:48153894-48154076:-	Y	N	-2.4822	1.93044e-07	2.59518e-05	-0.044938	ENSG00000104177	MYEF2
1:207770124-207770309:+	Y	N	-1.44826	1.93556e-07	2.60056e-05	-0.0959971	ENSG00000117335	CD46
1:198253181-198256327:+	Y	Y	-1.65374	1.93777e-07	2.60201e-05	-0.0253116	ENSG00000151414	NEK7
6:154039835-154046693:+	Y	Y	-1.51281	1.93938e-07	2.60201e-05	-0.0422281	ENSG00000112038	OPRM1
X:53549506-53550665:-	Y	Y	-1.24289	1.94001e-07	2.60201e-05	-0.0142598	ENSG00000086758	HUWE1
11:124776243-124779003:-	Y	Y	-1.35369	1.94632e-07	2.60897e-05	-0.141987	ENSG00000120458	MSANTD2
2:43934879-43942565:-	Y	Y	-1.46807	1.95425e-07	2.61808e-05	-0.0046419	ENSG00000138095	LRPPRC
1:186386084-186388441:+	Y	Y	1.52627	1.96688e-07	2.63195e-05	0.072484	ENSG00000157181	ODR4
2:43948549-43949601:-	Y	Y	-2.29897	1.96789e-07	2.63195e-05	-0.0113421	ENSG00000138095	LRPPRC
2:174997714-175004554:-	Y	Y	-1.14185	1.968e-07	2.63195e-05	-0.0176329	ENSG00000128656	CHN1
17:57985985-57986144:-	Y	N	-1.49688	1.97431e-07	2.63886e-05	-0.0690143	ENSG00000136451	VEZF1
7:99081428-99120642:-	Y	Y	-1.37081	1.97675e-07	2.6406e-05	-0.00899211	ENSG00000198742	SMURF1
12:51960188-51975264:+	Y	Y	-1.4477	1.98071e-07	2.64438e-05	-0.0202727	ENSG00000135503	ACVR1B
1:1794198-1804418:-	Y	Y	-0.747098	1.98502e-07	2.6486e-05	-0.00120176	ENSG00000078369	GNB1
3:152302450-152335110:+	Y	Y	-1.68072	1.99993e-07	2.66697e-05	-0.0318146	ENSG00000152601	MBNL1
15:57092024-57109257:+	Y	Y	-1.09969	2.00812e-07	2.67635e-05	-0.00823598	ENSG00000140262	TCF12
16:28121763-28125688:-	Y	Y	-1.12289	2.01483e-07	2.68375e-05	-0.00426148	ENSG00000169180	XPO6
7:143289657-143291539:+	Y	Y	-1.16887	2.02631e-07	2.69595e-05	-0.0398013	ENSG00000106144	CASP2
21:39345830-39345958:-	Y	N	-1.25558	2.0252e-07	2.69595e-05	-0.0715497	ENSG00000205581	HMGN1
9:125652258-125657650:-	Y	Y	-1.11599	2.04292e-07	2.71649e-05	-0.00505201	ENSG00000119487	MAPKAP1
6:30294965-30296131:-	Y	Y	-1.36731	2.0448e-07	2.71742e-05	-0.0904218	ENSG00000231074	HCG18
1:244654026-244656295:+	Y	Y	-1.09223	2.05014e-07	2.72296e-05	-0.012753	ENSG00000121644	DESI2
19:10965310-10977652:+	Y	Y	-1.11388	2.0526e-07	2.72467e-05	-0.00407833	ENSG00000127616	SMARCA4
4:82881941-82890694:-	Y	Y	-0.997924	2.05443e-07	2.72555e-05	-0.00487476	ENSG00000138674	SEC31A
4:1846630-1849148:-	Y	Y	-1.42227	2.06255e-07	2.73476e-05	-0.00435752	ENSG00000168924	LETM1
2:73932684-73938909:+	Y	Y	-0.931164	2.06438e-07	2.73561e-05	-0.00413549	ENSG00000114956	DGUOK
6:85581259-85581846:-	Y	N	-2.07402	2.06903e-07	2.74021e-05	-0.0368527	ENSG00000135317	SNX14
7:116953692-117014887:+	Y	Y	-1.46761	2.08423e-07	2.75877e-05	-0.0209035	ENSG00000004866	ST7
7:135662595-135672752:+	Y	Y	-1.10362	2.09971e-07	2.77768e-05	-0.0205413	ENSG00000243317	STMP1
6:17675771-17688395:-	Y	Y	-1.15196	2.10798e-07	2.7844e-05	-0.00608197	ENSG00000124789	NUP153
9:107284914-107300140:+	Y	Y	-0.835755	2.10839e-07	2.7844e-05	-0.00648934	ENSG00000119318	RAD23B
14:96536895-96536975:+	Y	N	-1.82656	2.10783e-07	2.7844e-05	-0.0873094	ENSG00000090060	PAPOLA
15:70984553-71008378:+	Y	Y	-1.66341	2.11074e-07	2.78592e-05	-0.0050423	ENSG00000137821	LRRC49
2:73927053-73932597:+	Y	Y	-0.889017	2.11738e-07	2.79308e-05	-0.00433977	ENSG00000114956	DGUOK
2:32529825-32531354:+	Y	Y	-1.9802	2.12028e-07	2.79374e-05	-0.0114931	ENSG00000115760	BIRC6
17:63151381-63155226:+	Y	N	-1.71226	2.12003e-07	2.79374e-05	-0.0111585	ENSG00000170921	TANC2
3:37947212-37954416:+	Y	Y	-2.88604	2.12498e-07	2.79834e-05	-0.0382134	ENSG00000144677	CTDSPL
1:1546488-1560847:-	Y	Y	0.970745	2.13087e-07	2.80451e-05	0.0115237	ENSG00000160075	SSU72
5:43547914-43555829:-	Y	Y	-1.03743	2.13755e-07	2.8117e-05	-0.00721255	ENSG00000172239	PAIP1
9:83981005-83999708:+	Y	Y	-1.44465	2.13891e-07	2.8119e-05	-0.0389029	ENSG00000178966	RMI1
13:46042276-46044954:-	Y	Y	-1.3938	2.14644e-07	2.8186e-05	-0.0157567	ENSG00000123200	ZC3H13
17:73286854-73306697:-	Y	Y	-1.32868	2.14627e-07	2.8186e-05	-0.0130709	ENSG00000179604	CDC42EP4
4:42001781-42018110:+	Y	Y	-1.05209	2.15776e-07	2.83027e-05	-0.00247712	ENSG00000014824	SLC30A9
20:21365705-21368462:+	Y	Y	-1.20053	2.15735e-07	2.83027e-05	-0.0152051	ENSG00000088930	XRN2
4:75787203-75790149:+	Y	Y	1.59474	2.16977e-07	2.84441e-05	0.0188667	ENSG00000138768	USO1
2:131133016-131140166:+	Y	Y	-1.06347	2.17881e-07	2.85465e-05	-0.00507457	ENSG00000115762	PLEKHB2
17:17078077-17096767:+	Y	Y	-0.984742	2.18617e-07	2.86268e-05	-0.00635138	ENSG00000133030	MPRIP
4:42067193-42070188:+	Y	Y	-1.1207	2.18941e-07	2.8653e-05	-0.00964933	ENSG00000014824	SLC30A9
21:25905078-25911740:-	Y	Y	-0.989448	2.19892e-07	2.87613e-05	-0.00208039	ENSG00000142192	APP
17:46172233-46192418:-	Y	Y	-1.15718	2.2014e-07	2.87774e-05	-0.0141893	ENSG00000120071	KANSL1
7:92392293-92395868:+	Y	Y	-1.39381	2.20902e-07	2.88609e-05	-0.020942	ENSG00000001629	ANKIB1
4:95278363-95301605:-	Y	Y	-0.735594	2.21941e-07	2.89803e-05	-0.0039034	ENSG00000182168	UNC5C
16:84982118-84988762:-	Y	Y	-1.09624	2.22848e-07	2.90823e-05	-0.0176506	ENSG00000153786	ZDHHC7
10:68919982-68934198:+	Y	Y	1.18894	2.23553e-07	2.91578e-05	0.013346	ENSG00000107625	DDX50
4:95242429-95242593:-	Y	N	14.074	2.24674e-07	2.92876e-05	0.0148177	ENSG00000182168	UNC5C
3:119924434-119946899:-	Y	Y	-1.12234	2.25776e-07	2.94147e-05	-0.00537863	ENSG00000082701	GSK3B
3:177087042-177091150:-	Y	Y	-1.27897	2.26293e-07	2.94512e-05	-0.00617775	ENSG00000177565	TBL1XR1
11:46697285-46697572:-	Y	N	2.32608	2.26309e-07	2.94512e-05	0.0852053	ENSG00000175220	ARHGAP1
6:2124732-2175931:-	Y	Y	-1.96455	2.26445e-07	2.94523e-05	-0.00605514	ENSG00000112699	GMDS
3:100739486-100742155:+	Y	Y	-1.04929	2.27756e-07	2.96063e-05	-0.00981749	ENSG00000114354	TFG
16:2256867-2258756:-	Y	N	-0.794903	2.28521e-07	2.96891e-05	-0.0046835	ENSG00000205937	RNPS1
4:174241219-174256026:-	Y	Y	-0.798831	2.29468e-07	2.97953e-05	-0.0108083	ENSG00000164117	FBXO8
1:241186893-241261503:-	Y	Y	-1.99312	2.30085e-07	2.98589e-05	-0.0416137	ENSG00000182901	RGS7
18:51030624-51044958:+	Y	Y	-1.361	2.30389e-07	2.98815e-05	-0.020417	ENSG00000141646	SMAD4
7:84195446-84295041:-	Y	Y	-1.48104	2.31617e-07	3.0024e-05	-0.017469	ENSG00000075213	SEMA3A
1:71069601-71070826:-	Y	Y	-1.05214	2.3178e-07	3.00279e-05	-0.0687531	ENSG00000132485	ZRANB2
14:24177385-24177408:+	Y	N	1.22946	2.31906e-07	3.00279e-05	0.118558	ENSG00000100918	REC8
5:124637907-124638781:-	Y	Y	-1.43687	2.3205e-07	3.00298e-05	-0.0719796	ENSG00000168916	ZNF608
4:140967874-140996957:-	Y	Y	-1.1206	2.3244e-07	3.00635e-05	-0.00419384	ENSG00000170153	RNF150
4:150683964-150735257:-	Y	Y	-1.38289	2.3445e-07	3.03017e-05	-0.00422235	ENSG00000198589	LRBA
11:66670984-66675559:-	Y	Y	-1.4357	2.34542e-07	3.03017e-05	-0.02452	ENSG00000173914	RBM4B
4:173527889-173528078:-	N	N	-0.537867	2.34985e-07	3.0342e-05	-0.0282677	ENSG00000164107	HAND2
4:109718762-109729601:-	Y	Y	-1.43138	2.35587e-07	3.04027e-05	-0.0168691	ENSG00000123739	PLA2G12A
7:18907035-18935808:+	Y	Y	-1.54484	2.35937e-07	3.0431e-05	-0.0133949	ENSG00000048052	HDAC9
5:168685928-168686978:-	Y	Y	-1.442	2.36945e-07	3.0544e-05	-0.0287033	ENSG00000184347	SLIT3
11:3363392-3366690:-	Y	N	-1.32109	2.38506e-07	3.07282e-05	-0.0536227	ENSG00000005801	ZNF195
9:14180803-14300185:-	Y	Y	-0.925335	2.38958e-07	3.07622e-05	-0.00609435	ENSG00000147862	NFIB
15:34863225-34867523:-	Y	Y	-1.34414	2.39035e-07	3.07622e-05	-0.0162132	ENSG00000021776	AQR
4:56050013-56170194:+	Y	Y	-1.66664	2.41238e-07	3.10285e-05	-0.0204718	ENSG00000109265	CRACD
11:130261932-130314374:-	Y	Y	-1.75142	2.42159e-07	3.11297e-05	-0.0117051	ENSG00000196323	ZBTB44
1:155689628-155709032:+	Y	Y	-0.79272	2.45758e-07	3.15574e-05	-0.00428637	ENSG00000132676	DAP3
7:86926917-86938125:-	Y	Y	-1.10404	2.45644e-07	3.15574e-05	-0.016347	ENSG00000164659	ELAPOR2
11:90215231-90216463:-	Y	Y	-1.71278	2.46024e-07	3.15741e-05	-0.0694461	ENSG00000110172	CHORDC1
8:28924756-28963810:+	Y	Y	-1.27667	2.46878e-07	3.16662e-05	-0.0071536	ENSG00000147421	HMBOX1
1:55110247-55120595:-	Y	Y	-1.24464	2.48744e-07	3.18703e-05	-0.014554	ENSG00000162402	USP24
7:92671536-92725625:-	Y	Y	-1.00418	2.48638e-07	3.18703e-05	-0.00532879	ENSG00000105810	CDK6
20:33623955-33624763:+	Y	Y	-1.51213	2.49375e-07	3.19335e-05	-0.106811	ENSG00000078699	CBFA2T2
17:29925556-29928281:-	Y	Y	-2.05791	2.51081e-07	3.21343e-05	-0.0515754	ENSG00000141298	SSH2
10:48325966-48364611:+	Y	Y	-0.935248	2.53336e-07	3.2405e-05	-0.0104501	ENSG00000107643	MAPK8
1:155868792-155880499:+	Y	Y	-0.585598	2.54007e-07	3.24729e-05	-0.00249539	ENSG00000132718	SYT11
15:29800703-29820526:-	Y	Y	-1.26833	2.54196e-07	3.24791e-05	-0.00828727	ENSG00000104067	TJP1
19:36324924-36324925:-	Y	N	-2.28203	2.55761e-07	3.26611e-05	-0.359296	ENSG00000232677	LINC00665
3:33574497-33576168:-	Y	Y	-1.84051	2.56e-07	3.26677e-05	-0.0133242	ENSG00000163539	CLASP2
7:91079481-91112541:+	Y	Y	-1.27491	2.56094e-07	3.26677e-05	-0.00513314	ENSG00000058091	CDK14
3:195392148-195410706:-	Y	Y	-1.35901	2.56922e-07	3.27553e-05	-0.00575455	ENSG00000114331	ACAP2
1:178885212-178885621:+	Y	N	-2.97228	2.57653e-07	3.28125e-05	-0.0861547	ENSG00000116191	RALGPS2
3:122365467-122365564:-	Y	N	4.57264	2.57556e-07	3.28125e-05	0.598161	ENSG00000160124	MIX23
19:29971228-29980158:+	Y	Y	-1.19065	2.58161e-07	3.28591e-05	-0.0104355	ENSG00000105176	URI1
3:45399564-45399692:+	Y	N	3.37318	2.59114e-07	3.29624e-05	0.219244	ENSG00000011376	LARS2
18:47920170-47922546:-	Y	Y	-1.2321	2.59929e-07	3.30479e-05	-0.0120038	ENSG00000175387	SMAD2
7:8084639-8084896:+	Y	N	-1.40938	2.6099e-07	3.31646e-05	-0.0352344	ENSG00000106415	GLCCI1
1:51814814-51815928:-	Y	Y	-1.03666	2.61461e-07	3.32063e-05	-0.0228302	ENSG00000078618	NRDC
1:28518695-28518957:+	Y	N	1.58392	2.61834e-07	3.32354e-05	0.0916032	ENSG00000180198	RCC1
2:209684662-209687718:+	Y	Y	-1.35441	2.62965e-07	3.33607e-05	-0.0121318	ENSG00000078018	MAP2
19:49496636-49497172:+	N	N	0.95602	2.63114e-07	3.33614e-05	0.00243448	ENSG00000142534	RPS11
5:159203657-159207474:-	Y	Y	-1.29433	2.63775e-07	3.34269e-05	-0.014904	ENSG00000145860	RNF145
1:30968493-30974648:-	Y	Y	-1.10377	2.65824e-07	3.36683e-05	-0.0108244	ENSG00000134644	PUM1
X:24073529-24076199:+	Y	Y	-0.81199	2.66223e-07	3.37003e-05	-0.0250407	ENSG00000130741	EIF2S3
6:33305388-33308104:-	Y	Y	-1.45217	2.6708e-07	3.37905e-05	-0.0102433	ENSG00000231925	TAPBP
1:227048011-227051880:-	Y	Y	-1.29542	2.67535e-07	3.38296e-05	-0.0089929	ENSG00000143776	CDC42BPA
8:129878716-129879388:-	N	N	-1.68308	2.67915e-07	3.38592e-05	-0.0139618	ENSG00000153310	CYRIB
2:71333078-71334500:+	Y	Y	-1.98468	2.69903e-07	3.40918e-05	-0.0304975	ENSG00000075292	ZNF638
2:55292915-55293552:-	Y	Y	-1.4471	2.70385e-07	3.41224e-05	-0.119966	ENSG00000115355	CCDC88A
7:130070810-130094894:+	Y	Y	-1.05646	2.70439e-07	3.41224e-05	-0.010718	ENSG00000128607	KLHDC10
12:69260198-69262369:+	Y	Y	-1.05216	2.71064e-07	3.41826e-05	-0.018782	ENSG00000111605	CPSF6
5:151800870-151803537:+	Y	Y	-1.19311	2.71426e-07	3.42097e-05	-0.00778944	ENSG00000145907	G3BP1
1:93904589-93908664:-	Y	Y	-2.14683	2.71909e-07	3.4252e-05	-0.0265839	ENSG00000023909	GCLM
4:109561018-109648483:+	Y	Y	-1.43722	2.72626e-07	3.4305e-05	-0.00563915	ENSG00000005059	MCUB
5:102974838-102987517:+	Y	Y	-1.11463	2.72513e-07	3.4305e-05	-0.00577046	ENSG00000145730	PAM
9:112619215-112645649:+	Y	Y	-1.28571	2.7293e-07	3.43246e-05	-0.133128	ENSG00000165185	KIAA1958
13:111186991-111203059:+	Y	Y	-1.09828	2.7526e-07	3.4599e-05	-0.0049639	ENSG00000102606	ARHGEF7
1:66257864-66266037:+	Y	Y	-1.22511	2.76533e-07	3.47401e-05	-0.0242854	ENSG00000184588	PDE4B
11:28059162-28062394:-	Y	Y	-1.6344	2.7763e-07	3.48591e-05	-0.0152917	ENSG00000121621	KIF18A
10:109891720-109891721:-	Y	N	-2.97488	2.78879e-07	3.4997e-05	-0.105896	ENSG00000108039	XPNPEP1
3:14959642-14962406:+	Y	Y	-1.71612	2.79553e-07	3.50626e-05	-0.0554462	ENSG00000177463	NR2C2
18:55510773-55518981:-	Y	Y	-1.4614	2.80156e-07	3.51192e-05	-0.0100441	ENSG00000196628	TCF4
6:161232303-161273937:-	Y	Y	-1.55829	2.81347e-07	3.52495e-05	-0.0231971	ENSG00000026652	AGPAT4
6:125293232-125297486:-	Y	Y	-1.23814	2.81659e-07	3.52695e-05	-0.0241293	ENSG00000111906	HDDC2
7:157220777-157223253:+	Y	N	-1.15414	2.8263e-07	3.5372e-05	-0.0215734	ENSG00000009335	UBE3C
19:46704650-46710353:-	Y	Y	-1.34392	2.83924e-07	3.55148e-05	-0.0123821	ENSG00000105287	PRKD2
2:43989662-43994980:-	Y	Y	-1.42867	2.84239e-07	3.5516e-05	-0.0082654	ENSG00000138095	LRPPRC
8:96234537-96235511:-	Y	N	1.50018	2.84154e-07	3.5516e-05	0.0146316	ENSG00000156467	UQCRB
3:47827478-47829023:+	Y	Y	-1.20564	2.84451e-07	3.55234e-05	-0.00711081	ENSG00000132153	DHX30
9:123630477-123652012:-	Y	Y	-1.53928	2.8617e-07	3.57188e-05	-0.00463664	ENSG00000119522	DENND1A
5:102901414-102913933:+	Y	Y	-1.53247	2.87159e-07	3.5823e-05	-0.00280255	ENSG00000145730	PAM
1:26728912-26729650:+	Y	N	-1.47606	2.88173e-07	3.593e-05	-0.0185682	ENSG00000117713	ARID1A
1:113622995-113641910:+	Y	Y	-1.72181	2.88664e-07	3.5972e-05	-0.00954307	ENSG00000081026	MAGI3
9:125785655-125797394:+	Y	Y	-1.39119	2.88876e-07	3.59791e-05	-0.0173368	ENSG00000167081	PBX3
19:42344834-42348271:+	Y	Y	-1.22239	2.90215e-07	3.61265e-05	-0.00943467	ENSG00000105429	MEGF8
5:146462097-146463550:+	Y	Y	-1.77157	2.9043e-07	3.61339e-05	-0.0259494	ENSG00000113649	TCERG1
22:20090856-20091434:+	N	N	2.04338	2.91877e-07	3.62944e-05	0.302833	ENSG00000128191	DGCR8
1:98662817-98677300:+	Y	Y	-0.954401	2.92184e-07	3.63131e-05	-0.00331469	ENSG00000162627	SNX7
3:196052698-196053417:-	Y	N	1.93338	2.96207e-07	3.67934e-05	0.0189624	ENSG00000072274	TFRC
5:139315751-139316075:+	Y	N	-1.51274	2.96546e-07	3.68159e-05	-0.00954808	ENSG00000015479	MATR3
8:143930537-143931533:-	Y	Y	-1.87706	2.96978e-07	3.68497e-05	-0.0273854	ENSG00000178209	PLEC
5:10410277-10411332:+	Y	Y	-1.38589	3.00262e-07	3.72373e-05	-0.0151535	ENSG00000145495	MARCHF6
12:122044372-122054804:+	Y	Y	-1.13626	3.0239e-07	3.74812e-05	-0.00339641	ENSG00000110987	BCL7A
2:175111655-175113993:-	Y	Y	-1.06338	3.04055e-07	3.76674e-05	-0.0113791	ENSG00000115966	ATF2
1:112653662-112654464:+	Y	Y	-1.17268	3.04535e-07	3.77067e-05	-0.00953145	ENSG00000116489	CAPZA1
9:116442554-116487358:-	Y	Y	-1.11341	3.076e-07	3.80456e-05	-0.00803527	ENSG00000148219	ASTN2
11:4127035-4127256:+	Y	N	-4.36594	3.07541e-07	3.80456e-05	-0.0377388	ENSG00000167325	RRM1
2:170929942-170936623:+	Y	Y	-1.01281	3.08141e-07	3.80735e-05	-0.00517685	ENSG00000115806	GORASP2
10:87880439-87894024:+	Y	Y	-1.2052	3.08154e-07	3.80735e-05	-0.00969607	ENSG00000171862	PTEN
X:154775315-154776186:+	Y	N	2.01927	3.08317e-07	3.80735e-05	0.106684	ENSG00000130826	DKC1
6:87681764-87700509:-	Y	Y	-1.13544	3.08599e-07	3.8088e-05	-0.0165335	ENSG00000135334	AKIRIN2
3:28341648-28348160:-	Y	Y	-1.38428	3.09672e-07	3.82001e-05	-0.0073485	ENSG00000163512	AZI2
3:157152242-157152501:-	Y	N	-1.54537	3.09987e-07	3.82187e-05	-0.165132	ENSG00000163660	CCNL1
1:160323531-160325542:-	Y	Y	-1.12289	3.10324e-07	3.82399e-05	-0.00371178	ENSG00000122218	COPA
2:65242064-65246184:+	Y	Y	-1.72199	3.12296e-07	3.84625e-05	-0.00571207	ENSG00000138071	ACTR2
18:63331902-63334922:-	Y	Y	1.5498	3.13082e-07	3.85388e-05	0.0181711	ENSG00000119537	KDSR
7:140799054-140800361:-	Y	N	-1.50515	3.13458e-07	3.85646e-05	-0.0343005	ENSG00000157764	BRAF
5:66158809-66158932:+	Y	N	1.96229	3.14788e-07	3.87078e-05	0.305636	ENSG00000153914	SREK1
1:169111499-169116250:+	Y	Y	-0.791573	3.15369e-07	3.87586e-05	-0.00592675	ENSG00000143153	ATP1B1
7:129351662-129368122:+	Y	Y	-2.46566	3.17571e-07	3.90086e-05	-0.0336649	ENSG00000158467	AHCYL2
13:102617052-102618721:+	Y	Y	-1.39239	3.19113e-07	3.91773e-05	-0.0256231	ENSG00000134900	TPP2
16:56614-57085:+	Y	Y	3.15574	3.19538e-07	3.92087e-05	0.0151048	ENSG00000161981	SNRNP25
2:46361091-46369826:+	Y	Y	-1.58199	3.19896e-07	3.92319e-05	-0.0105896	ENSG00000116016	EPAS1
17:80709115-80730559:+	Y	Y	-1.27843	3.20525e-07	3.92883e-05	-0.00484224	ENSG00000141564	RPTOR
12:70319365-70327506:+	Y	Y	-1.34678	3.2184e-07	3.94286e-05	-0.030894	ENSG00000111596	CNOT2
7:134300262-134301760:-	Y	Y	-1.06862	3.23306e-07	3.95873e-05	-0.0215675	ENSG00000205060	SLC35B4
1:230255439-230261865:+	Y	Y	-1.21628	3.23682e-07	3.96125e-05	-0.00381528	ENSG00000143641	GALNT2
1:31935660-31937754:-	Y	Y	-1.55237	3.24941e-07	3.9733e-05	-0.00444219	ENSG00000184007	PTP4A2
16:227987-228070:-	Y	N	-1.52987	3.2501e-07	3.9733e-05	-0.25112	ENSG00000007392	LUC7L
12:7191701-7199010:+	Y	Y	-1.32801	3.26775e-07	3.99278e-05	-0.0202803	ENSG00000139197	PEX5
20:3575949-3576858:+	Y	Y	-1.63705	3.28586e-07	4.0128e-05	-0.0196671	ENSG00000088812	ATRN
7:150960877-150974710:-	Y	Y	-1.36434	3.28988e-07	4.01559e-05	-0.0231626	ENSG00000055118	KCNH2
7:72901129-72913077:+	Y	Y	-0.859374	3.32155e-07	4.05212e-05	-0.00871787	ENSG00000196313	POM121
4:183701809-183704978:+	Y	Y	-1.66222	3.33249e-07	4.06333e-05	-0.0390313	ENSG00000168538	TRAPPC11
2:3262138-3274338:-	Y	Y	-1.38823	3.34686e-07	4.07871e-05	-0.00727759	ENSG00000032389	EIPR1
5:134705438-134708712:+	Y	Y	-1.99733	3.35258e-07	4.08353e-05	-0.0166463	ENSG00000113615	SEC24A
12:102153990-102154826:+	Y	Y	1.36157	3.3657e-07	4.09736e-05	0.0856701	ENSG00000185480	PARPBP
2:84441460-84443220:-	Y	Y	-2.02341	3.36836e-07	4.09844e-05	-0.0127024	ENSG00000163541	SUCLG1
4:41264466-41267986:+	Y	Y	-0.683948	3.38929e-07	4.12175e-05	-0.00289257	ENSG00000154277	UCHL1
5:146459338-146462017:+	Y	Y	-1.46358	3.41729e-07	4.15363e-05	-0.0276332	ENSG00000113649	TCERG1
11:3711575-3711881:-	Y	N	-1.65216	3.42245e-07	4.15772e-05	-0.0915355	ENSG00000110713	NUP98
7:18585523-18590335:+	Y	Y	-1.1097	3.43855e-07	4.17097e-05	-0.0229061	ENSG00000048052	HDAC9
11:10806048-10806263:-	Y	N	-0.907429	3.43978e-07	4.17097e-05	-0.0219062	ENSG00000110321	EIF4G2
17:75841033-75841156:-	Y	N	1.96932	3.43798e-07	4.17097e-05	0.0890718	ENSG00000092929	UNC13D
21:43676337-43676732:+	Y	Y	2.12804	3.44055e-07	4.17097e-05	0.070654	ENSG00000160208	RRP1B
2:108534595-108570703:+	Y	Y	-1.38195	3.44503e-07	4.17423e-05	-0.0176566	ENSG00000169756	LIMS1
13:100302999-100305775:+	Y	Y	-1.58139	3.45644e-07	4.18586e-05	-0.0279272	ENSG00000175198	PCCA
3:49375592-49406711:-	Y	Y	-0.674838	3.46569e-07	4.19488e-05	-0.000707636	ENSG00000067560	RHOA
8:91986973-91991638:-	Y	Y	-2.03575	3.4761e-07	4.20529e-05	-0.04313	ENSG00000079102	RUNX1T1
2:112542785-112545830:+	Y	Y	-1.14047	3.48685e-07	4.21609e-05	-0.0264037	ENSG00000125630	POLR1B
11:21283779-21370852:+	Y	Y	-1.60991	3.4982e-07	4.22761e-05	-0.00321753	ENSG00000165973	NELL1
11:108089492-108089623:+	Y	N	-4.83771	3.50366e-07	4.23201e-05	-0.187053	ENSG00000166266	CUL5
2:20308585-20311493:-	Y	Y	-1.21211	3.51124e-07	4.23895e-05	-0.00742434	ENSG00000055917	PUM2
5:83555039-83572415:+	Y	Y	-1.59137	3.51474e-07	4.24098e-05	-0.00242694	ENSG00000038427	VCAN
1:164682484-164684965:+	Y	N	-1.8494	3.532e-07	4.25738e-05	-0.021959	ENSG00000185630	PBX1
4:118303880-118305944:-	Y	Y	-1.45869	3.53116e-07	4.25738e-05	-0.0347787	ENSG00000164099	PRSS12
14:66880034-66916002:+	Y	Y	-1.43277	3.55582e-07	4.28386e-05	-0.00489345	ENSG00000171723	GPHN
7:93887432-93889016:-	Y	Y	-1.22428	3.56985e-07	4.29852e-05	-0.0118814	ENSG00000105825	TFPI2
5:112902519-112921162:-	Y	Y	-1.04412	3.58723e-07	4.31497e-05	-0.00183894	ENSG00000129625	REEP5
20:20043720-20045307:-	Y	Y	-1.56493	3.58541e-07	4.31497e-05	-0.0187827	ENSG00000101343	CRNKL1
1:246306010-246325812:-	Y	Y	-1.25282	3.59629e-07	4.32363e-05	-0.0198408	ENSG00000185420	SMYD3
10:16782085-16816972:-	Y	Y	-1.02497	3.60485e-07	4.33168e-05	-0.00213032	ENSG00000148484	RSU1
2:127502873-127503386:-	Y	Y	2.49205	3.62064e-07	4.3484e-05	0.112337	ENSG00000163166	IWS1
6:109106091-109124990:+	Y	Y	-1.51418	3.63634e-07	4.365e-05	-0.0315275	ENSG00000183137	CEP57L1
4:39849653-39862218:-	Y	Y	1.03427	3.64968e-07	4.37875e-05	0.0105761	ENSG00000121892	PDS5A
7:79460694-79460983:+	Y	N	-1.73618	3.65594e-07	4.38399e-05	-0.265145	ENSG00000234456	MAGI2-AS3
11:125610709-125611373:+	Y	N	-1.37254	3.65966e-07	4.38619e-05	-0.0133598	ENSG00000134910	STT3A
2:190910322-190913192:+	Y	Y	-1.23971	3.6755e-07	4.4029e-05	-0.00869924	ENSG00000115419	GLS
22:22558971-22559083:-	Y	N	-0.938744	3.68508e-07	4.41209e-05	-0.14432	ENSG00000185686	PRAME
10:8058842-8063992:+	Y	Y	-0.502041	3.69274e-07	4.41899e-05	-0.0145262	ENSG00000107485	GATA3
17:37576481-37577379:-	Y	Y	-1.63438	3.69883e-07	4.42399e-05	-0.0389684	ENSG00000275066	SYNRG
1:43669300-43671504:+	Y	Y	-1.22683	3.70382e-07	4.42768e-05	-0.0425085	ENSG00000066135	KDM4A
5:15501724-15615874:+	Y	Y	-2.13921	3.70977e-07	4.43251e-05	-0.0453092	ENSG00000183580	FBXL7
10:121743859-121763475:-	Y	Y	-1.18829	3.71981e-07	4.44222e-05	-0.00618087	ENSG00000107669	ATE1
14:30605566-30605812:+	Y	N	-1.79071	3.72408e-07	4.44503e-05	-0.14969	ENSG00000092140	G2E3
2:32416164-32429145:+	Y	Y	-1.09275	3.72792e-07	4.44732e-05	-0.00838782	ENSG00000115760	BIRC6
16:23406263-23410294:-	Y	Y	-2.12616	3.74575e-07	4.4663e-05	-0.0239825	ENSG00000168434	COG7
6:109372870-109375886:-	Y	Y	-0.919726	3.76379e-07	4.4855e-05	-0.00534957	ENSG00000135535	CD164
7:64541730-64541917:-	N	N	1.93736	3.7789e-07	4.5012e-05	0.323116	ENSG00000173041	ZNF680
22:35756145-35759887:-	Y	Y	-1.31389	3.78566e-07	4.50693e-05	-0.0115636	ENSG00000100320	RBFOX2
11:93732314-93732360:-	Y	N	-1.86736	3.80336e-07	4.52568e-05	-0.170132	ENSG00000166012	TAF1D
3:17185209-17214206:-	Y	Y	-1.28871	3.81427e-07	4.53635e-05	-0.00535454	ENSG00000131374	TBC1D5
6:157829707-157867546:+	Y	Y	-1.71831	3.82062e-07	4.54157e-05	-0.0213847	ENSG00000130340	SNX9
17:39343242-39401360:-	Y	Y	-1.30883	3.8332e-07	4.55418e-05	-0.00974836	ENSG00000108306	FBXL20
7:1480934-1481341:-	Y	Y	1.35411	3.83805e-07	4.55761e-05	0.0315687	ENSG00000164880	INTS1
2:58229659-58229813:-	Y	N	-2.56708	3.85275e-07	4.57273e-05	-0.0931762	ENSG00000115392	FANCL
1:236812845-236815603:+	Y	Y	-1.52925	3.86321e-07	4.58281e-05	-0.0242969	ENSG00000116984	MTR
17:76558374-76558600:+	Y	N	1.08684	3.87266e-07	4.59167e-05	0.0435528	ENSG00000163597	SNHG16
12:110459863-110464779:-	Y	Y	-1.40505	3.87946e-07	4.59738e-05	-0.00643945	ENSG00000111231	GPN3
5:147473345-147509477:-	Y	Y	-1.05414	3.8974e-07	4.61628e-05	-0.00544539	ENSG00000113657	DPYSL3
13:37019398-37021447:-	Y	Y	-1.84241	3.91645e-07	4.63648e-05	-0.0480885	ENSG00000102710	SUPT20H
11:72722089-72722358:-	Y	N	-2.16044	3.92942e-07	4.64946e-05	-0.194401	ENSG00000186635	ARAP1
20:21382058-21386276:+	Y	Y	-1.035	3.96342e-07	4.6873e-05	-0.00868216	ENSG00000088930	XRN2
9:97641692-97643203:+	Y	Y	-1.68532	3.96947e-07	4.68981e-05	-0.03514	ENSG00000136937	NCBP1
14:35775746-35807804:-	Y	Y	-1.68384	3.96958e-07	4.68981e-05	-0.00506424	ENSG00000174373	RALGAPA1
4:174297551-174297965:+	N	N	-1.05226	3.97719e-07	4.69641e-05	-0.0426645	ENSG00000164118	CEP44
10:87336890-87341336:-	Y	Y	-1.4249	3.97999e-07	4.69731e-05	-0.0117218	ENSG00000223482	NUTM2A-AS1
8:144792144-144792153:-	Y	N	1.03783	3.99912e-07	4.7175e-05	0.104366	ENSG00000161016	RPL8
1:35269086-35284672:+	Y	Y	-1.34377	4.0118e-07	4.73005e-05	-0.0107165	ENSG00000146463	ZMYM4
1:180774176-180787752:+	Y	Y	-1.14346	4.0364e-07	4.75663e-05	-0.000894621	ENSG00000143324	XPR1
15:32031038-32098196:+	Y	Y	-1.57748	4.06423e-07	4.787e-05	-0.0116871	ENSG00000175344	CHRNA7
12:128815929-128819527:-	Y	Y	-2.15462	4.0664e-07	4.78713e-05	-0.0928627	ENSG00000139370	SLC15A4
X:134373468-134377571:+	Y	Y	-1.28968	4.07056e-07	4.7896e-05	-0.0142763	ENSG00000156531	PHF6
12:53453284-53454383:+	Y	Y	-0.860081	4.08711e-07	4.80663e-05	-0.00751178	ENSG00000197111	PCBP2
4:54049306-54064181:-	Y	Y	-1.2263	4.09362e-07	4.81158e-05	-0.00574381	ENSG00000109220	CHIC2
13:40959017-40981982:-	Y	Y	-1.45411	4.09547e-07	4.81158e-05	-0.00788348	ENSG00000120690	ELF1
3:138188531-138209816:+	Y	Y	-1.08255	4.12376e-07	4.84237e-05	-0.0145657	ENSG00000114098	ARMC8
2:207570322-207571733:+	Y	Y	-1.28541	4.1286e-07	4.84561e-05	-0.0214775	ENSG00000118260	CREB1
5:73041316-73051099:+	Y	Y	2.36739	4.13828e-07	4.85205e-05	0.314356	ENSG00000157107	FCHO2
6:43777826-43778171:+	Y	N	-1.64299	4.13644e-07	4.85205e-05	-0.105946	ENSG00000112715	VEGFA
4:98352602-98379016:+	Y	Y	-1.08865	4.15397e-07	4.86799e-05	-0.00551729	ENSG00000138698	RAP1GDS1
3:29903239-29924750:+	Y	Y	-1.48144	4.17269e-07	4.88747e-05	-0.00608198	ENSG00000144642	RBMS3
5:113234678-113294328:-	Y	Y	-1.58784	4.17706e-07	4.89011e-05	-0.0362557	ENSG00000171444	MCC
12:69256843-69257731:+	Y	Y	-1.14201	4.18205e-07	4.89348e-05	-0.00950678	ENSG00000111605	CPSF6
13:77699224-77719531:+	Y	Y	-1.29214	4.18818e-07	4.89819e-05	-0.0147092	ENSG00000139737	SLAIN1
15:64983594-64987171:-	Y	Y	-1.02591	4.21932e-07	4.93212e-05	-0.00747477	ENSG00000090487	SPG21
3:123933756-123944848:-	Y	Y	-1.2427	4.22962e-07	4.94167e-05	-0.0207853	ENSG00000175455	CCDC14
17:41988897-41989403:-	Y	Y	1.67535	4.23209e-07	4.94207e-05	0.0152932	ENSG00000168259	DNAJC7
11:129041010-129062279:-	Y	Y	-1.92359	4.24246e-07	4.94919e-05	-0.0291078	ENSG00000134909	ARHGAP32
15:57248082-57251168:+	Y	Y	-1.25036	4.24203e-07	4.94919e-05	-0.00488244	ENSG00000140262	TCF12
1:185306626-185306749:-	Y	Y	-1.20139	4.25909e-07	4.9661e-05	-0.121942	ENSG00000116679	IVNS1ABP
14:30560843-30574534:+	Y	Y	-1.15795	4.26778e-07	4.97373e-05	-0.0314924	ENSG00000092140	G2E3
11:95783269-95786118:-	Y	Y	-1.36347	4.27586e-07	4.98065e-05	-0.0301363	ENSG00000077458	FAM76B
7:30621679-30622316:+	Y	N	-0.895846	4.29103e-07	4.99581e-05	-0.0488865	ENSG00000106105	GARS1
11:68515167-68519500:+	Y	Y	-1.19069	4.30523e-07	5.00983e-05	-0.00811268	ENSG00000110075	PPP6R3
3:105681293-105681478:-	Y	N	-2.90698	4.31632e-07	5.01545e-05	-0.0947832	ENSG00000114423	CBLB
5:147406199-147408727:-	Y	Y	-1.15741	4.31655e-07	5.01545e-05	-0.00758784	ENSG00000113657	DPYSL3
11:61828598-61837777:+	Y	Y	-0.640828	4.31288e-07	5.01545e-05	-0.00351328	ENSG00000134824	FADS2
1:173865566-173865817:-	Y	N	-0.830268	4.33344e-07	5.0297e-05	-0.034223	ENSG00000234741	GAS5
3:124082333-124090442:+	Y	Y	-1.79635	4.33322e-07	5.0297e-05	-0.0358345	ENSG00000160145	KALRN
[truncated: 17,761 more rows]

## Sheet: NV1 competition vs. B1-PAL DSGs
coorsID	annotated	isIntron	altsplice_log2fc	altsplice_pvalue	altsplice_padj	altsplice_delta_psi	gene_id	gene_name		DSGs = differentially spliced genes
1:182860306-182866443:+	Y	Y	5.627	1.84344e-244	4.18536e-239	0.367367	ENSG00000135829	DHX9
17:59687148-59689155:+	Y	Y	5.30494	1.23125e-195	1.39772e-190	0.273789	ENSG00000141367	CLTC
2:197393352-197396055:-	Y	Y	5.41465	5.59956e-186	4.23777e-181	0.197126	ENSG00000115524	SF3B1
11:130123780-130126699:+	Y	Y	4.40116	4.29194e-147	2.43612e-142	0.121115	ENSG00000084234	APLP2
8:116858459-116859046:-	Y	N	5.28187	4.56759e-128	2.07406e-123	0.283477	ENSG00000164754	RAD21
9:35057834-35059063:-	Y	N	5.15141	2.14804e-122	8.12824e-118	0.253589	ENSG00000165280	VCP
2:229771633-229773560:-	Y	Y	4.87738	3.29816e-120	1.06974e-115	0.309207	ENSG00000153827	TRIP12
20:35716806-35721739:-	Y	Y	5.11631	3.79754e-117	1.07775e-112	0.221667	ENSG00000131051	RBM39
12:53476071-53479405:+	Y	Y	2.39852	3.34815e-115	8.4463e-111	0.0188179	ENSG00000197111	PCBP2
6:31626163-31626771:+	Y	Y	4.41716	2.50649e-101	5.69075e-97	0.352721	ENSG00000204469	PRRC2A
11:65856474-65856884:-	Y	Y	5.42657	1.89792e-100	3.91733e-96	0.232919	ENSG00000172757	CFL1
2:206160843-206161024:+	Y	Y	3.99019	3.93835e-100	7.4514e-96	0.385966	ENSG00000114942	EEF1B2
2:229773561-229774096:-	Y	N	5.18323	2.73965e-98	4.78472e-94	0.438129	ENSG00000153827	TRIP12
15:98913283-98915963:+	Y	Y	4.74832	5.79416e-95	9.39651e-91	0.301303	ENSG00000140443	IGF1R
6:36599846-36600276:+	Y	N	2.53358	2.5349e-94	3.83684e-90	0.286933	ENSG00000112081	SRSF3
11:32589642-32593768:+	Y	Y	3.68711	6.0574e-94	8.59548e-90	0.0928929	ENSG00000149100	EIF3M
7:101165115-101165373:-	Y	Y	4.58358	1.58074e-93	2.11114e-89	0.314649	ENSG00000128564	VGF
22:27873816-27894160:-	Y	Y	5.03254	6.9776e-92	8.80112e-88	0.287564	ENSG00000180957	PITPNB
4:56995410-56999616:+	Y	Y	4.39895	3.97129e-89	4.74551e-85	0.169899	ENSG00000047315	POLR2B
7:101165035-101165114:-	Y	N	4.62239	1.9945e-88	2.26417e-84	0.4831	ENSG00000128564	VGF
1:28518958-28529857:+	Y	Y	4.44219	6.58705e-88	7.12158e-84	0.297125	ENSG00000180198	RCC1
10:75221167-75222225:+	Y	Y	3.84647	9.52348e-88	9.82828e-84	0.126249	ENSG00000165637	VDAC2
7:101164986-101165034:-	Y	N	4.47826	5.20178e-87	5.13485e-83	0.461637	ENSG00000128564	VGF
17:59689156-59690635:+	Y	N	4.99505	3.57243e-86	3.37953e-82	0.268287	ENSG00000141367	CLTC
16:70527430-70528209:+	N	N	6.36291	1.3424e-84	1.21912e-80	0.403661	ENSG00000189091	SF3B3
8:116859047-116861840:-	Y	Y	5.16656	3.5799e-82	3.1261e-78	0.251182	ENSG00000164754	RAD21
12:67297854-67298949:+	Y	Y	5.77592	7.18873e-82	6.04495e-78	0.382848	ENSG00000111530	CAND1
2:152662699-152663034:-	Y	Y	7.37214	2.386e-81	1.93472e-77	0.585691	ENSG00000196504	PRPF40A
1:45594774-45600384:+	Y	Y	4.67213	3.3222e-81	2.60095e-77	0.338133	ENSG00000132780	NASP
X:53214848-53215713:-	Y	Y	5.01658	9.13624e-81	6.91433e-77	0.23453	ENSG00000126012	KDM5C
11:68554258-68556906:+	Y	Y	3.78524	1.11531e-80	8.16844e-77	0.283387	ENSG00000110075	PPP6R3
2:135872844-135876258:-	Y	Y	4.712	1.40137e-80	9.94279e-77	0.285756	ENSG00000076003	MCM6
3:139369545-139371722:-	Y	Y	4.4176	5.59035e-79	3.84618e-75	0.149507	ENSG00000184432	COPB2
5:134175571-134176613:-	Y	Y	3.75746	1.08041e-78	7.21463e-75	0.236256	ENSG00000113558	SKP1
11:130133729-130135562:+	Y	Y	3.74043	3.19237e-78	2.07085e-74	0.0616075	ENSG00000084234	APLP2
3:23968024-23977222:+	Y	Y	6.97893	1.62788e-77	1.02666e-73	0.591077	ENSG00000174738	NR1D2
7:6026962-6028614:-	Y	Y	3.52785	9.7696e-77	5.99487e-73	0.122861	ENSG00000086232	EIF2AK1
20:492718-494130:-	Y	Y	4.52987	1.49727e-76	8.94585e-73	0.183601	ENSG00000101266	CSNK2A1
18:669898-670691:+	Y	Y	2.99403	6.75888e-76	3.93473e-72	0.157701	ENSG00000176890	TYMS
17:38771273-38776603:-	Y	Y	4.26202	1.78597e-73	1.01372e-69	0.0903957	ENSG00000276293	PIP4K2B
3:51430213-51433105:-	Y	Y	6.84619	3.24921e-73	1.79928e-69	0.555789	ENSG00000145041	DCAF1
11:47819459-47821375:-	Y	Y	4.486	4.4228e-73	2.39085e-69	0.355544	ENSG00000030066	NUP160
11:9410087-9414235:+	Y	Y	2.80821	7.75038e-73	4.09222e-69	0.0387363	ENSG00000205339	IPO7
17:43507198-43507502:+	Y	Y	5.99448	2.29257e-72	1.18297e-68	0.61146	ENSG00000067596	DHX8
5:163517675-163518192:+	Y	N	5.66698	3.77411e-72	1.90417e-68	0.514311	ENSG00000038274	MAT2B
19:15254263-15255296:-	Y	Y	4.75053	2.033e-70	1.00342e-66	0.339396	ENSG00000141867	BRD4
11:65856243-65856473:-	Y	N	3.75317	3.10703e-70	1.48389e-66	0.270024	ENSG00000172757	CFL1
21:29065106-29066715:-	Y	Y	4.62338	3.13718e-70	1.48389e-66	0.139397	ENSG00000156261	CCT8
17:81888584-81888875:-	N	N	4.69921	1.39598e-69	6.46827e-66	0.421283	ENSG00000183684	ALYREF
7:120970881-120973204:+	Y	Y	6.77066	1.25483e-68	5.69797e-65	0.773043	ENSG00000071243	ING3
11:130135716-130137255:+	Y	Y	3.99748	2.64229e-68	1.17629e-64	0.238669	ENSG00000084234	APLP2
1:179856171-179859029:-	Y	Y	3.98752	3.07051e-68	1.34064e-64	0.327345	ENSG00000169905	TOR1AIP2
2:241250997-241252956:-	Y	Y	3.5067	1.17587e-67	5.03719e-64	0.114352	ENSG00000115677	HDLBP
16:2449463-2449827:+	Y	Y	4.61325	1.34732e-67	5.66477e-64	0.413521	ENSG00000162063	CCNF
7:94656592-94661037:+	Y	Y	4.24768	1.44525e-67	5.966e-64	0.0592852	ENSG00000242265	PEG10
2:96296692-96296932:-	Y	Y	5.02594	2.35734e-67	9.55736e-64	0.296569	ENSG00000144028	SNRNP200
13:98463837-98466375:-	Y	Y	3.90458	4.06459e-67	1.619e-63	0.0817513	ENSG00000102572	STK24
10:119071086-119072889:-	Y	Y	4.29557	2.77387e-66	1.08583e-62	0.0959945	ENSG00000107581	EIF3A
16:58555909-58556846:-	Y	Y	5.67659	1.11576e-65	4.2936e-62	0.50464	ENSG00000125107	CNOT1
10:1009581-1010419:+	Y	Y	5.35161	1.30596e-65	4.94179e-62	0.557026	ENSG00000107937	GTPBP4
2:96298421-96298602:-	Y	Y	5.18863	2.55152e-65	9.49671e-62	0.540182	ENSG00000144028	SNRNP200
12:39351981-39356599:-	Y	Y	5.84798	2.82004e-65	1.03269e-61	0.709407	ENSG00000139116	KIF21A
7:98186999-98190727:+	Y	Y	5.30333	2.91611e-65	1.05091e-61	0.507336	ENSG00000164715	LMTK2
11:68557025-68558195:+	Y	Y	4.13813	3.05342e-65	1.08321e-61	0.330431	ENSG00000110075	PPP6R3
7:11015220-11022867:+	Y	Y	4.29692	4.32624e-65	1.48823e-61	0.237987	ENSG00000106443	PHF14
17:47606021-47612459:+	Y	Y	3.60412	4.28127e-65	1.48823e-61	0.0682087	ENSG00000141279	NPEPPS
17:81888901-81888987:-	Y	N	5.02179	1.41605e-64	4.79854e-61	0.592402	ENSG00000183684	ALYREF
9:35057531-35057833:-	Y	N	4.43608	7.13525e-64	2.38234e-60	0.353382	ENSG00000165280	VCP
17:62601802-62601949:+	N	N	6.88143	1.56949e-63	5.16433e-60	0.648192	ENSG00000146872	TLK2
6:170544367-170546102:-	Y	Y	3.38987	2.80641e-63	9.10243e-60	0.0436115	ENSG00000008018	PSMB1
13:31147053-31147230:-	N	N	4.69395	5.26894e-63	1.68488e-59	0.376963	ENSG00000120694	HSPH1
11:130138778-130139655:+	Y	N	4.5221	1.15472e-62	3.64124e-59	0.265086	ENSG00000084234	APLP2
1:10279139-10282321:+	Y	Y	4.09446	1.51906e-62	4.72449e-59	0.293834	ENSG00000054523	KIF1B
12:22673661-22682280:+	Y	Y	4.42024	1.58202e-62	4.85383e-59	0.211961	ENSG00000139163	ETNK1
13:31145769-31147052:-	Y	Y	3.70489	1.69685e-62	5.13674e-59	0.159709	ENSG00000120694	HSPH1
14:21230898-21230957:-	Y	N	4.18389	2.96334e-62	8.85264e-59	0.25576	ENSG00000092199	HNRNPC
11:65856885-65856930:-	Y	N	5.24768	8.28925e-62	2.44416e-58	0.317309	ENSG00000172757	CFL1
15:58640961-58643885:-	Y	Y	4.77132	3.96611e-61	1.15445e-57	0.180996	ENSG00000137845	ADAM10
7:2367120-2369471:+	Y	Y	3.60715	8.43165e-61	2.4232e-57	0.161439	ENSG00000106263	EIF3B
11:64196836-64196995:+	Y	N	4.38626	4.49609e-60	1.276e-56	0.282287	ENSG00000168439	STIP1
17:81888876-81888900:-	Y	N	4.87036	4.75176e-60	1.33191e-56	0.509263	ENSG00000183684	ALYREF
14:73111383-73111527:+	Y	N	3.98378	4.9592e-60	1.3731e-56	0.576623	ENSG00000119707	RBM25
19:46728407-46728617:-	Y	Y	5.61775	9.46427e-60	2.58889e-56	0.355249	ENSG00000090372	STRN4
2:229807865-229808251:-	Y	Y	5.24583	1.06387e-59	2.8755e-56	0.49745	ENSG00000153827	TRIP12
16:8811714-8812990:+	Y	Y	4.85148	1.18612e-59	3.16822e-56	0.468328	ENSG00000140650	PMM2
5:179614960-179615545:-	Y	N	3.9079	1.33834e-59	3.53322e-56	0.465536	ENSG00000169045	HNRNPH1
11:64195877-64196835:+	Y	Y	4.33801	1.549e-59	4.04239e-56	0.155926	ENSG00000168439	STIP1
20:37199226-37200446:+	Y	Y	4.27917	1.7663e-59	4.55708e-56	0.0781318	ENSG00000118705	RPN2
8:103435791-103439481:+	Y	Y	4.14758	2.1223e-59	5.41404e-56	0.166417	ENSG00000164934	DCAF13
6:170543731-170544320:-	Y	Y	3.57879	3.53106e-59	8.90773e-56	0.119836	ENSG00000008018	PSMB1
2:206161025-206161117:+	Y	N	4.02109	7.08067e-59	1.7666e-55	0.398898	ENSG00000114942	EEF1B2
11:4129151-4132285:+	Y	Y	3.27131	9.06972e-59	2.23826e-55	0.0635097	ENSG00000167325	RRM1
5:168823332-168844583:-	Y	Y	-3.97271	1.00142e-58	2.42696e-55	-0.0311084	ENSG00000184347	SLIT3
X:41171959-41183993:+	Y	Y	3.99295	1.00482e-58	2.42696e-55	0.107868	ENSG00000124486	USP9X
4:94283304-94284959:+	Y	Y	6.21097	1.20651e-58	2.88345e-55	0.413372	ENSG00000163104	SMARCAD1
12:108539090-108542769:-	Y	Y	4.60344	1.27535e-58	3.01623e-55	0.409703	ENSG00000075856	SART3
19:46728127-46728299:-	Y	N	6.02227	1.66427e-58	3.89545e-55	0.383942	ENSG00000090372	STRN4
1:156137462-156137653:+	Y	N	5.36225	4.24993e-58	9.84601e-55	0.435057	ENSG00000160789	LMNA
13:45339497-45339533:-	Y	N	-6.70278	4.87427e-58	1.11784e-54	-0.0282648	ENSG00000133112	TPT1
4:56999782-57005245:+	Y	Y	4.32712	5.25165e-58	1.19234e-54	0.208237	ENSG00000047315	POLR2B
2:73235646-73237551:+	Y	Y	3.01021	1.02008e-57	2.29307e-54	0.0141752	ENSG00000135624	CCT7
2:161224747-161230970:+	Y	Y	5.14561	2.66242e-57	5.92626e-54	0.421427	ENSG00000136560	TANK
X:154350356-154350908:-	Y	N	3.32763	2.27457e-56	5.0138e-53	0.251681	ENSG00000196924	FLNA
1:185311323-185316952:-	Y	Y	3.64008	2.64521e-56	5.77473e-53	0.327057	ENSG00000116679	IVNS1ABP
1:165903280-165903992:+	Y	Y	4.52341	2.90334e-56	6.27787e-53	0.182448	ENSG00000143179	UCK2
11:65856931-65856964:-	Y	N	5.27246	4.18408e-56	8.96186e-53	0.304754	ENSG00000172757	CFL1
14:73111309-73111382:+	Y	N	4.82042	4.58696e-56	9.73297e-53	0.674224	ENSG00000119707	RBM25
9:92274522-92277862:-	Y	Y	4.43439	5.36869e-56	1.12862e-52	0.161799	ENSG00000196305	IARS1
X:154361571-154361669:-	Y	Y	4.92181	8.8728e-56	1.84815e-52	0.47251	ENSG00000196924	FLNA
2:108782863-108783191:+	Y	N	5.06407	1.56011e-55	3.22009e-52	0.63494	ENSG00000153201	RANBP2
15:43763207-43765310:+	Y	Y	4.69277	1.69867e-55	3.47449e-52	0.112351	ENSG00000167004	PDIA3
17:63812209-63813227:+	Y	Y	4.1425	1.94094e-55	3.93457e-52	0.333802	ENSG00000198231	DDX42
2:65104807-65129892:-	Y	Y	2.41429	2.81074e-55	5.64737e-52	0.0168882	ENSG00000138069	RAB1A
18:669465-669897:+	N	N	2.96872	4.93351e-55	9.82552e-52	0.126167	ENSG00000176890	TYMS
1:154263506-154266451:+	Y	Y	3.57764	5.00036e-55	9.87205e-52	0.217405	ENSG00000143569	UBAP2L
1:30941273-30941921:-	Y	Y	4.20214	5.07714e-55	9.93724e-52	0.427145	ENSG00000134644	PUM1
17:81600428-81604547:-	Y	Y	3.14944	1.29212e-54	2.50739e-51	0.117942	ENSG00000182446	NPLOC4
5:179615596-179616125:-	Y	N	4.94959	1.4533e-54	2.79627e-51	0.492245	ENSG00000169045	HNRNPH1
1:114570751-114575589:-	Y	Y	3.25321	2.24846e-54	4.28986e-51	0.0464216	ENSG00000116752	BCAS2
1:244417753-244418759:-	Y	Y	4.86274	2.80541e-54	5.30786e-51	0.157063	ENSG00000035687	ADSS2
1:117896990-117899056:-	Y	Y	5.52182	3.30336e-54	6.19834e-51	0.441889	ENSG00000196505	GDAP2
1:36089116-36091243:+	Y	Y	4.24885	3.60753e-54	6.71359e-51	0.509964	ENSG00000116863	ADPRS
7:133930714-133937890:+	Y	Y	4.25337	1.28034e-53	2.36333e-50	0.0644683	ENSG00000131558	EXOC4
1:156123396-156126159:+	Y	Y	3.814	1.29721e-53	2.37515e-50	0.0715137	ENSG00000160789	LMNA
5:43291221-43292473:-	Y	Y	5.17338	1.41924e-53	2.57781e-50	0.567217	ENSG00000112972	HMGCS1
19:5654201-5654367:+	Y	Y	5.81499	1.66347e-53	2.99743e-50	0.674715	ENSG00000160633	SAFB
15:38470663-38473504:+	Y	Y	4.32314	1.83379e-53	3.27831e-50	0.122686	ENSG00000171262	FAM98B
17:82094188-82095319:-	Y	Y	2.63536	1.9171e-53	3.40047e-50	0.132636	ENSG00000169710	FASN
19:8464750-8465323:+	N	N	3.54848	2.30833e-53	4.06268e-50	0.239446	ENSG00000099783	HNRNPM
1:77585060-77631849:-	Y	Y	4.60256	2.58724e-53	4.51854e-50	0.370598	ENSG00000036549	ZZZ3
16:70528210-70528662:+	Y	Y	6.39272	3.76964e-53	6.53331e-50	0.421359	ENSG00000189091	SF3B3
9:125342300-125345889:+	Y	Y	4.44448	4.70332e-53	8.08975e-50	0.248582	ENSG00000165219	GAPVD1
10:28611255-28611481:+	Y	N	4.4687	7.09758e-53	1.21161e-49	0.600825	ENSG00000095787	WAC
1:37541595-37548820:-	Y	Y	6.80209	1.47199e-52	2.49404e-49	0.74245	ENSG00000163877	SNIP1
2:43912786-43915056:-	Y	N	3.19714	2.05941e-52	3.46348e-49	0.038873	ENSG00000138095	LRPPRC
1:156126950-156129826:+	Y	Y	3.74263	2.25921e-52	3.77156e-49	0.0890205	ENSG00000160789	LMNA
5:171400291-171400785:+	Y	N	4.47502	2.32782e-52	3.85775e-49	0.278851	ENSG00000181163	NPM1
1:224418417-224419444:-	Y	Y	3.55748	2.43974e-52	4.01392e-49	0.214448	ENSG00000162923	WDR26
22:32394003-32395025:-	Y	Y	4.73714	4.5793e-52	7.47978e-49	0.204763	ENSG00000100220	RTCB
5:179822889-179822957:+	Y	N	4.49421	4.74797e-52	7.69989e-49	0.63621	ENSG00000161011	SQSTM1
1:151401356-151401541:+	Y	N	2.40906	5.0469e-52	8.12662e-49	0.168846	ENSG00000159377	PSMB4
X:154351204-154351580:-	Y	N	2.66046	5.23584e-52	8.37149e-49	0.249152	ENSG00000196924	FLNA
4:2625545-2626409:+	Y	Y	6.16313	5.87237e-52	9.32356e-49	0.620473	ENSG00000125386	FAM193A
9:128371416-128377994:+	Y	Y	3.47811	5.92324e-52	9.33902e-49	0.0514727	ENSG00000167118	URM1
21:32352907-32353932:-	Y	Y	4.28295	6.25593e-52	9.79553e-49	0.420687	ENSG00000142207	URB1
19:47153041-47155113:+	Y	Y	3.95931	8.15684e-52	1.26845e-48	0.0519043	ENSG00000142230	SAE1
7:128042465-128074501:+	Y	Y	2.9247	2.49007e-51	3.8459e-48	0.0249469	ENSG00000197157	SND1
1:110950124-110951287:-	Y	Y	4.83954	2.61737e-51	4.01521e-48	0.437273	ENSG00000121931	LRIF1
1:179852812-179856057:-	Y	Y	4.36412	6.78457e-51	1.03381e-47	0.165126	ENSG00000169905	TOR1AIP2
8:47918384-47926832:-	Y	Y	3.85456	1.28104e-50	1.93899e-47	0.0626221	ENSG00000253729	PRKDC
10:5735547-5739617:+	Y	Y	4.07847	1.57559e-50	2.36903e-47	0.15115	ENSG00000108021	TASOR2
2:224480125-224481891:-	Y	Y	4.29712	1.79606e-50	2.66523e-47	0.0911749	ENSG00000036257	CUL3
7:6024802-6026434:-	Y	Y	3.45832	1.78696e-50	2.66523e-47	0.0514618	ENSG00000086232	EIF2AK1
15:78540951-78541555:+	Y	N	2.84198	2.48034e-50	3.63536e-47	0.0862973	ENSG00000041357	PSMA4
X:149491668-149495482:-	Y	Y	2.98799	2.48184e-50	3.63536e-47	0.0695884	ENSG00000010404	IDS
14:21230661-21230897:-	Y	Y	4.20105	3.2065e-50	4.6667e-47	0.133323	ENSG00000092199	HNRNPC
11:68558196-68558565:+	Y	N	3.87174	3.82578e-50	5.53253e-47	0.378947	ENSG00000110075	PPP6R3
2:61880395-61883458:-	Y	Y	2.44298	4.66162e-50	6.6986e-47	0.042775	ENSG00000115484	CCT4
3:196814569-196818056:+	Y	Y	3.67826	4.72185e-50	6.74248e-47	0.0808875	ENSG00000180370	PAK2
3:169988360-169992593:+	Y	Y	5.41921	4.76919e-50	6.76751e-47	0.356418	ENSG00000008952	SEC62
3:48164438-48165635:-	Y	Y	4.12567	5.21282e-50	7.35108e-47	0.329903	ENSG00000164045	CDC25A
4:2625462-2625544:+	Y	N	8.81935	8.41887e-50	1.17989e-46	0.853229	ENSG00000125386	FAM193A
X:53534698-53535383:-	Y	Y	4.90643	1.01304e-49	1.41105e-46	0.483117	ENSG00000086758	HUWE1
17:82079609-82079929:-	Y	N	3.16248	2.16902e-49	3.00278e-46	0.199237	ENSG00000169710	FASN
9:135816006-135817787:-	Y	Y	4.94301	5.7478e-49	7.90901e-46	0.377749	ENSG00000130559	CAMSAP1
10:1007633-1008957:+	Y	Y	5.30376	7.35553e-49	1.00603e-45	0.711046	ENSG00000107937	GTPBP4
5:179821142-179821550:+	Y	Y	4.95615	7.61263e-49	1.03496e-45	0.466826	ENSG00000161011	SQSTM1
7:35898528-35903075:+	Y	N	2.9436	8.21965e-49	1.11083e-45	0.119698	ENSG00000122545	SEPTIN7
1:154262203-154263102:+	Y	Y	3.25774	1.01972e-48	1.36994e-45	0.154031	ENSG00000143569	UBAP2L
1:156115275-156123141:+	Y	Y	3.56636	1.2268e-48	1.63844e-45	0.0968786	ENSG00000160789	LMNA
1:23972013-23974973:-	Y	Y	3.07833	1.36852e-48	1.81702e-45	0.178358	ENSG00000188529	SRSF10
11:130137292-130138777:+	Y	Y	4.50352	1.5634e-48	2.0637e-45	0.260025	ENSG00000084234	APLP2
16:70544169-70544437:+	N	N	5.34777	3.21844e-48	4.2238e-45	0.443716	ENSG00000189091	SF3B3
19:15401604-15403318:-	Y	N	4.71776	3.56817e-48	4.65587e-45	0.478471	ENSG00000011243	AKAP8L
1:212047418-212062883:+	Y	Y	2.58563	3.71177e-48	4.81556e-45	0.0764751	ENSG00000143476	DTL
1:230246151-230249183:+	Y	Y	4.06334	4.34248e-48	5.57018e-45	0.162178	ENSG00000143641	GALNT2
3:32545966-32566612:-	Y	Y	3.01964	4.33429e-48	5.57018e-45	0.0530929	ENSG00000144635	DYNC1LI1
2:224478346-224480124:-	Y	N	4.9041	4.51361e-48	5.75716e-45	0.132851	ENSG00000036257	CUL3
11:47821376-47821723:-	Y	N	4.36454	5.0193e-48	6.36641e-45	0.450676	ENSG00000030066	NUP160
10:119070576-119070661:-	N	N	5.85775	6.33499e-48	7.99056e-45	0.493138	ENSG00000107581	EIF3A
1:64846910-64847531:-	Y	Y	4.56154	8.28068e-48	1.0387e-44	0.228198	ENSG00000162434	JAK1
X:53218738-53220838:-	Y	Y	3.45414	1.03026e-47	1.28523e-44	0.144027	ENSG00000126012	KDM5C
7:151361250-151366938:+	Y	Y	3.50092	1.06421e-47	1.32033e-44	0.244162	ENSG00000013374	NUB1
2:8818794-8824058:-	Y	Y	4.5202	1.13023e-47	1.39461e-44	0.10194	ENSG00000134313	KIDINS220
20:21348999-21349388:+	N	N	4.60356	1.2238e-47	1.50191e-44	0.472504	ENSG00000088930	XRN2
5:179822485-179822888:+	Y	N	4.4883	1.26519e-47	1.54435e-44	0.547483	ENSG00000161011	SQSTM1
11:65856965-65857033:-	Y	N	5.28699	1.39429e-47	1.69283e-44	0.320122	ENSG00000172757	CFL1
2:206161118-206161132:+	Y	N	3.97451	1.45461e-47	1.75668e-44	0.299766	ENSG00000114942	EEF1B2
20:37200495-37203711:+	Y	Y	3.82466	2.17203e-47	2.60921e-44	0.0519762	ENSG00000118705	RPN2
6:136261478-136267028:-	Y	Y	3.44975	4.27252e-47	5.10546e-44	0.0465155	ENSG00000029363	BCLAF1
5:179825227-179833031:+	Y	Y	3.42137	4.35245e-47	5.17374e-44	0.0572124	ENSG00000161011	SQSTM1
17:41988897-41989403:-	Y	Y	4.27693	4.57084e-47	5.40505e-44	0.118337	ENSG00000168259	DNAJC7
7:87561388-87566069:-	Y	Y	3.76667	5.18311e-47	6.09729e-44	0.17589	ENSG00000085563	ABCB1
4:82425563-82425582:-	Y	N	3.13811	5.85832e-47	6.85607e-44	0.478601	ENSG00000152795	HNRNPDL
7:127991057-127997471:+	Y	Y	2.22449	6.07098e-47	7.04534e-44	0.0317835	ENSG00000197157	SND1
17:38776626-38777686:-	Y	Y	4.49906	6.0821e-47	7.04534e-44	0.158808	ENSG00000276293	PIP4K2B
11:64197047-64197176:+	Y	N	4.14049	1.1734e-46	1.35233e-43	0.281519	ENSG00000168439	STIP1
19:58545764-58545896:+	Y	N	-3.99789	1.23309e-46	1.41395e-43	-0.105058	ENSG00000130726	TRIM28
5:160412520-160413455:-	Y	Y	4.96001	1.3066e-46	1.49071e-43	0.326415	ENSG00000164609	SLU7
2:206142832-206144017:-	Y	Y	3.32177	1.32269e-46	1.50152e-43	0.177824	ENSG00000023228	NDUFS1
1:84496371-84497428:+	Y	Y	3.78964	1.58151e-46	1.7864e-43	0.153011	ENSG00000117133	RPF1
13:45339534-45339602:-	Y	N	-6.61802	1.84777e-46	2.07683e-43	-0.0142039	ENSG00000133112	TPT1
15:44716620-44716939:+	Y	N	5.15872	5.01742e-46	5.61163e-43	0.15811	ENSG00000166710	B2M
9:92068099-92070123:-	Y	Y	4.11593	7.56101e-46	8.415e-43	0.15627	ENSG00000090054	SPTLC1
4:82425583-82425667:-	Y	N	2.85386	8.69391e-46	9.62866e-43	0.45317	ENSG00000152795	HNRNPDL
17:8554290-8569719:-	Y	Y	4.03977	1.0707e-45	1.18006e-42	0.0806467	ENSG00000133026	MYH10
15:68153962-68164730:+	Y	Y	4.21594	1.52064e-45	1.66786e-42	0.247753	ENSG00000033800	PIAS1
6:31784715-31785245:-	Y	Y	3.60072	1.64633e-45	1.79704e-42	0.267708	ENSG00000204394	VARS1
16:3025824-3025923:+	Y	N	4.91422	1.88961e-45	2.05272e-42	0.684579	ENSG00000131652	THOC6
1:205097396-205098988:-	Y	Y	5.09852	2.03104e-45	2.19586e-42	0.39571	ENSG00000117222	RBBP5
2:218265175-218265370:-	Y	Y	3.48747	2.93475e-45	3.15786e-42	0.350218	ENSG00000127837	AAMP
2:224514773-224532980:-	Y	Y	3.0974	3.15924e-45	3.38338e-42	0.149268	ENSG00000036257	CUL3
17:1676371-1676504:-	Y	Y	3.28534	3.21137e-45	3.42307e-42	0.24986	ENSG00000174231	PRPF8
17:10692962-10695561:-	Y	Y	3.94109	5.65491e-45	5.99952e-42	0.26631	ENSG00000133028	SCO1
18:63338884-63340935:-	Y	Y	4.81515	6.23639e-45	6.58565e-42	0.346676	ENSG00000119537	KDSR
2:241346250-241346602:+	Y	N	3.46828	6.57782e-45	6.91405e-42	0.122578	ENSG00000168385	SEPTIN2
12:22682340-22684482:+	Y	Y	4.52038	7.75757e-45	8.11653e-42	0.183112	ENSG00000139163	ETNK1
7:100887860-100888034:+	Y	Y	4.58617	8.89482e-45	9.26371e-42	0.662459	ENSG00000087087	SRRT
2:230814115-230817753:+	Y	Y	5.38186	9.26029e-45	9.6003e-42	0.275713	ENSG00000135932	CAB39
16:72108926-72109414:+	Y	Y	4.54059	1.63828e-44	1.69071e-41	0.418452	ENSG00000140829	DHX38
2:43925962-43933440:-	Y	Y	3.22147	1.65182e-44	1.69697e-41	0.044552	ENSG00000138095	LRPPRC
14:21372469-21372717:-	Y	N	3.91214	1.76798e-44	1.80813e-41	0.305994	ENSG00000092201	SUPT16H
1:26761097-26761380:+	Y	Y	4.29357	2.42735e-44	2.47134e-41	0.416174	ENSG00000117713	ARID1A
6:142170422-142189425:+	Y	Y	2.47277	2.57139e-44	2.6063e-41	0.0374567	ENSG00000009844	VTA1
6:17662821-17665238:-	Y	Y	5.28345	2.69488e-44	2.71933e-41	0.34777	ENSG00000124789	NUP153
6:31641423-31641538:-	Y	N	3.47689	2.88898e-44	2.90228e-41	0.23116	ENSG00000204463	BAG6
8:73293151-73293342:-	Y	N	4.34201	3.51659e-44	3.51723e-41	0.475396	ENSG00000147604	RPL7
19:4929477-4930715:+	Y	Y	3.07157	4.20597e-44	4.18828e-41	0.0688426	ENSG00000276043	UHRF1
20:494225-495718:-	Y	N	4.17331	4.80529e-44	4.76419e-41	0.164788	ENSG00000101266	CSNK2A1
14:51878045-51913008:+	Y	Y	-3.33885	4.92002e-44	4.85672e-41	-0.0118447	ENSG00000186469	GNG2
4:56324267-56327643:+	Y	Y	3.63763	5.27661e-44	5.18618e-41	0.14976	ENSG00000109265	CRACD
16:3024366-3025707:+	Y	Y	5.53293	5.5825e-44	5.46318e-41	0.583089	ENSG00000131652	THOC6
7:158687443-158689818:-	Y	Y	4.68963	5.65195e-44	5.5074e-41	0.535009	ENSG00000146918	NCAPG2
14:73111156-73111308:+	Y	N	4.2089	6.86208e-44	6.65801e-41	0.620969	ENSG00000119707	RBM25
12:6859238-6859389:+	N	N	4.81398	8.31278e-44	8.03124e-41	0.434106	ENSG00000111667	USP5
8:20210946-20211176:+	N	N	4.21023	9.23105e-44	8.88063e-41	0.329638	ENSG00000147416	ATP6V1B2
19:14411599-14412358:-	Y	Y	3.53267	9.50184e-44	9.10256e-41	0.195597	ENSG00000123136	DDX39A
8:102836391-102836541:-	Y	N	3.10712	9.95136e-44	9.49314e-41	0.365394	ENSG00000155096	AZIN1
1:1228947-1231891:-	Y	Y	3.62759	1.20856e-43	1.14809e-40	0.105488	ENSG00000078808	SDF4
17:82079930-82080139:-	Y	Y	2.66315	1.40104e-43	1.32539e-40	0.196322	ENSG00000169710	FASN
2:216113130-216116637:+	Y	Y	2.25539	1.67533e-43	1.57829e-40	0.0554359	ENSG00000079246	XRCC5
8:47954447-47955873:-	Y	Y	3.48026	2.25609e-43	2.11664e-40	0.146291	ENSG00000253729	PRKDC
1:217614203-217619782:-	Y	Y	5.36089	2.6418e-43	2.4683e-40	0.559308	ENSG00000092978	GPATCH2
12:108542770-108542851:-	Y	N	4.8969	2.8755e-43	2.67564e-40	0.683693	ENSG00000075856	SART3
7:2363761-2364371:+	Y	Y	3.68843	3.87682e-43	3.59264e-40	0.291314	ENSG00000106263	EIF3B
2:241250167-241250937:-	Y	N	3.15599	3.90765e-43	3.60649e-40	0.137135	ENSG00000115677	HDLBP
17:59687022-59687147:+	Y	N	5.03823	4.09289e-43	3.76216e-40	0.494729	ENSG00000141367	CLTC
11:119052830-119054120:-	Y	Y	4.13571	4.11362e-43	3.76597e-40	0.0850242	ENSG00000149428	HYOU1
22:29511443-29511908:-	N	N	3.76658	4.41162e-43	4.02257e-40	0.222328	ENSG00000100296	THOC5
9:92265554-92267238:-	Y	Y	3.51479	4.69144e-43	4.2606e-40	0.0575003	ENSG00000196305	IARS1
6:136269231-136269261:-	Y	N	5.89751	5.28439e-43	4.77998e-40	0.758468	ENSG00000029363	BCLAF1
7:2374607-2375388:+	Y	N	3.84924	5.46314e-43	4.92205e-40	0.248193	ENSG00000106263	EIF3B
17:82094104-82094187:-	Y	N	3.2996	5.74106e-43	5.152e-40	0.295026	ENSG00000169710	FASN
16:58556994-58558472:-	Y	Y	4.01595	5.95484e-43	5.32281e-40	0.284844	ENSG00000125107	CNOT1
4:139351614-139354025:+	Y	Y	4.12732	9.02943e-43	8.03941e-40	0.172782	ENSG00000164134	NAA15
3:139348508-139349327:+	Y	N	3.8621	1.3452e-42	1.19303e-39	0.275053	ENSG00000175110	MRPS22
7:128008145-128042301:+	Y	Y	2.52273	1.36845e-42	1.20892e-39	0.0272869	ENSG00000197157	SND1
7:11014907-11015219:+	Y	N	4.34938	2.65847e-42	2.33946e-39	0.40089	ENSG00000106443	PHF14
1:243175189-243176701:-	Y	Y	4.69796	2.84476e-42	2.48414e-39	0.167266	ENSG00000143702	CEP170
X:53590500-53590999:-	Y	Y	5.82745	2.84151e-42	2.48414e-39	0.452318	ENSG00000086758	HUWE1
3:158653468-158654546:+	Y	Y	5.05641	2.91218e-42	2.53328e-39	0.269173	ENSG00000168827	GFM1
3:32566736-32570140:-	Y	Y	2.9678	2.96315e-42	2.56778e-39	0.0738586	ENSG00000144635	DYNC1LI1
6:136282688-136289712:-	Y	Y	2.96067	3.11714e-42	2.69094e-39	0.0975944	ENSG00000029363	BCLAF1
3:47847537-47847776:+	Y	Y	4.5551	4.38689e-42	3.77275e-39	0.362971	ENSG00000132153	DHX30
7:87181342-87182016:+	Y	Y	3.48446	4.58092e-42	3.92474e-39	0.333436	ENSG00000135164	DMTF1
2:101831852-101834408:+	Y	Y	3.01192	5.41704e-42	4.62364e-39	0.0845623	ENSG00000071054	MAP4K4
17:39520088-39524673:+	Y	Y	3.74607	5.49813e-42	4.67528e-39	0.119379	ENSG00000167258	CDK12
16:3737000-3738558:-	Y	Y	5.43792	6.66443e-42	5.64589e-39	0.607707	ENSG00000005339	CREBBP
5:179833783-179836435:+	Y	Y	2.75696	6.8409e-42	5.77385e-39	0.0905428	ENSG00000161011	SQSTM1
3:167687694-167695595:-	Y	Y	3.88195	7.91803e-42	6.65822e-39	0.234477	ENSG00000114209	PDCD10
2:86451214-86455084:+	Y	Y	5.1941	9.01208e-42	7.55023e-39	0.512963	ENSG00000115548	KDM3A
2:231067112-231070024:+	Y	Y	3.08735	1.01204e-41	8.44761e-39	0.0570137	ENSG00000173692	PSMD1
5:179823054-179823564:+	Y	Y	3.69129	1.03266e-41	8.58816e-39	0.197598	ENSG00000161011	SQSTM1
19:58545425-58545537:+	Y	N	-4.06777	1.12639e-41	9.33346e-39	-0.136902	ENSG00000130726	TRIM28
2:53870961-53874338:-	Y	Y	3.90912	1.51929e-41	1.25433e-38	0.312085	ENSG00000068878	PSME4
8:52628169-52630469:-	Y	Y	4.68421	1.55271e-41	1.27728e-38	0.217965	ENSG00000023287	RB1CC1
22:41131634-41135812:+	Y	Y	4.23703	1.81555e-41	1.48811e-38	0.146379	ENSG00000100393	EP300
11:68159172-68165714:-	Y	Y	5.36889	2.03061e-41	1.65245e-38	0.61965	ENSG00000110066	KMT5B
14:21426243-21427868:-	Y	N	7.28503	2.02955e-41	1.65245e-38	0.792283	ENSG00000100888	CHD8
12:122767605-122768781:+	Y	Y	4.0515	4.78786e-41	3.88229e-38	0.203319	ENSG00000139726	DENR
9:35062156-35062216:-	Y	N	3.87654	5.02414e-41	4.05938e-38	0.248668	ENSG00000165280	VCP
6:157141278-157148623:+	Y	Y	3.91779	5.0733e-41	4.08457e-38	0.141896	ENSG00000049618	ARID1B
5:151777735-151786571:+	Y	Y	3.72386	8.61854e-41	6.91435e-38	0.136733	ENSG00000145907	G3BP1
1:28518695-28518957:+	Y	N	4.65658	9.33044e-41	7.45913e-38	0.536441	ENSG00000180198	RCC1
1:108983452-108986522:-	Y	Y	6.75043	9.43121e-41	7.51323e-38	0.429447	ENSG00000085433	WDR47
17:37089075-37096995:-	Y	Y	4.53392	9.78764e-41	7.76992e-38	0.202155	ENSG00000278540	ACACA
16:84087461-84090874:-	Y	Y	3.78257	1.18611e-40	9.38311e-38	0.247079	ENSG00000140943	MBTPS1
20:49085283-49085386:+	Y	N	-5.91801	1.29112e-40	1.01784e-37	-0.185194	ENSG00000124207	CSE1L
5:55366876-55378313:+	Y	Y	3.07165	1.51998e-40	1.19411e-37	0.0392587	ENSG00000039123	MTREX
19:52206064-52211259:+	Y	Y	2.17112	1.74646e-40	1.3673e-37	0.0183581	ENSG00000105568	PPP2R1A
2:112741008-112742430:-	Y	Y	5.47326	2.07587e-40	1.61961e-37	0.665168	ENSG00000169607	CKAP2L
3:15016255-15020752:+	Y	Y	3.87913	2.15149e-40	1.67286e-37	0.244987	ENSG00000177463	NR2C2
1:10278558-10279096:+	Y	N	4.56771	2.25711e-40	1.74899e-37	0.466205	ENSG00000054523	KIF1B
2:241269562-241271916:-	Y	Y	2.67071	2.34954e-40	1.80849e-37	0.0974324	ENSG00000115677	HDLBP
22:27914348-27919101:-	Y	Y	2.9793	2.34981e-40	1.80849e-37	0.0606959	ENSG00000180957	PITPNB
20:62910021-62910773:-	Y	Y	5.23048	2.52772e-40	1.93884e-37	0.526978	ENSG00000101191	DIDO1
10:119069655-119070575:-	Y	Y	4.46126	2.61924e-40	2.00228e-37	0.202688	ENSG00000107581	EIF3A
4:75787203-75790149:+	Y	Y	4.15612	2.71659e-40	2.06972e-37	0.137581	ENSG00000138768	USO1
8:73292923-73293150:-	Y	Y	4.20232	2.84361e-40	2.15925e-37	0.486386	ENSG00000147604	RPL7
14:73727525-73728251:-	Y	N	5.07688	2.87228e-40	2.17375e-37	0.629196	ENSG00000156030	MIDEAS
2:32439687-32441328:+	Y	Y	4.01252	3.21371e-40	2.42406e-37	0.337689	ENSG00000115760	BIRC6
2:43975673-43976142:-	Y	N	4.00322	3.40967e-40	2.56336e-37	0.200256	ENSG00000138095	LRPPRC
12:71755289-71769799:+	Y	Y	4.46524	3.65494e-40	2.73868e-37	0.2644	ENSG00000080371	RAB21
12:101312277-101317477:+	Y	Y	5.24026	3.95226e-40	2.95173e-37	0.396115	ENSG00000120800	UTP20
6:160034523-160036725:+	Y	N	3.78837	4.47927e-40	3.33436e-37	0.265553	ENSG00000197081	IGF2R
6:36599821-36599845:+	Y	N	2.62656	7.16451e-40	5.31581e-37	0.37085	ENSG00000112081	SRSF3
2:43947731-43947775:-	Y	N	-6.61313	9.32261e-40	6.89451e-37	-0.296326	ENSG00000138095	LRPPRC
4:2625432-2625461:+	Y	N	18.2195	9.70181e-40	7.15165e-37	0.815652	ENSG00000125386	FAM193A
1:165898005-165902594:+	Y	Y	2.86294	1.32783e-39	9.75638e-37	0.145195	ENSG00000143179	UCK2
2:197402131-197402420:-	Y	Y	3.82237	1.3629e-39	9.98173e-37	0.240433	ENSG00000115524	SF3B1
5:179821568-179821707:+	Y	N	4.31035	1.85577e-39	1.35478e-36	0.393873	ENSG00000161011	SQSTM1
1:28536027-28536092:+	Y	Y	3.5793	2.0988e-39	1.52729e-36	0.303365	ENSG00000180198	RCC1
2:47478520-47480695:+	Y	Y	3.468	2.35016e-39	1.70474e-36	0.0928909	ENSG00000095002	MSH2
5:179821708-179822484:+	Y	Y	4.12261	2.36747e-39	1.71182e-36	0.443063	ENSG00000161011	SQSTM1
1:165904168-165905920:+	Y	Y	4.11918	2.44355e-39	1.76123e-36	0.136702	ENSG00000143179	UCK2
17:78073095-78075135:+	Y	Y	4.55255	2.48714e-39	1.78697e-36	0.406267	ENSG00000078687	TNRC6C
2:186495335-186499618:+	Y	Y	3.28725	3.05464e-39	2.18779e-36	0.147923	ENSG00000065548	ZC3H15
1:182387742-182387875:-	N	N	4.05856	3.1563e-39	2.25349e-36	0.259296	ENSG00000135821	GLUL
17:7845021-7845313:+	Y	Y	3.58041	3.28154e-39	2.33556e-36	0.319738	ENSG00000132510	KDM6B
17:27307790-27307870:+	Y	N	3.65577	3.67111e-39	2.60467e-36	0.558261	ENSG00000109046	WSB1
4:173527663-173527739:-	N	N	1.75719	3.80189e-39	2.68905e-36	0.213098	ENSG00000164107	HAND2
11:64197190-64197270:+	Y	N	4.08188	4.10921e-39	2.89739e-36	0.319383	ENSG00000168439	STIP1
1:154975625-154977298:+	Y	Y	2.90407	5.09255e-39	3.57962e-36	0.136615	ENSG00000173207	CKS1B
1:37548821-37548987:-	Y	N	7.17168	6.50455e-39	4.55803e-36	0.825775	ENSG00000163877	SNIP1
1:77956701-77960183:-	Y	Y	3.75182	6.64468e-39	4.64189e-36	0.255283	ENSG00000162613	FUBP1
3:196052698-196053417:-	Y	N	4.73152	6.70712e-39	4.67114e-36	0.152802	ENSG00000072274	TFRC
9:125345890-125346818:+	Y	N	4.24856	6.77813e-39	4.70616e-36	0.30522	ENSG00000165219	GAPVD1
7:128754723-128758870:+	Y	Y	2.46098	6.79919e-39	4.70638e-36	0.0588695	ENSG00000128595	CALU
5:179833247-179833386:+	Y	N	4.28587	6.99033e-39	4.82398e-36	0.447725	ENSG00000161011	SQSTM1
20:32430054-32430861:+	Y	N	3.10146	8.10962e-39	5.57944e-36	0.340155	ENSG00000171456	ASXL1
1:165896333-165897978:+	Y	Y	2.75248	8.35604e-39	5.73161e-36	0.163319	ENSG00000143179	UCK2
5:168806588-168817299:-	Y	Y	-3.1033	8.8359e-39	6.04251e-36	-0.0245965	ENSG00000184347	SLIT3
2:85636131-85637368:+	Y	Y	3.60665	9.21849e-39	6.28521e-36	0.120932	ENSG00000168883	USP39
11:62597713-62598023:-	Y	Y	3.42218	9.67989e-39	6.58003e-36	0.267125	ENSG00000149480	MTA2
1:32376742-32377969:-	Y	Y	4.26565	1.40048e-38	9.49152e-36	0.386762	ENSG00000160058	BSDC1
9:77815771-77920661:-	Y	Y	2.52163	1.5049e-38	1.01688e-35	0.0398595	ENSG00000156052	GNAQ
1:45630758-45633488:-	Y	Y	3.20993	1.56218e-38	1.05246e-35	0.0708517	ENSG00000159592	GPBP1L1
17:47675714-47675911:+	Y	N	2.63786	1.61964e-38	1.08794e-35	0.0634851	ENSG00000108424	KPNB1
2:65091079-65097970:-	Y	Y	2.69191	1.75526e-38	1.17336e-35	0.0476599	ENSG00000138069	RAB1A
3:184177612-184178217:+	Y	N	3.484	1.75713e-38	1.17336e-35	0.0696335	ENSG00000161203	AP2M1
12:50087486-50088234:+	Y	Y	2.54641	1.98699e-38	1.32295e-35	0.129574	ENSG00000066117	SMARCD1
20:494131-494224:-	Y	N	5.10437	2.04167e-38	1.35539e-35	0.273449	ENSG00000101266	CSNK2A1
20:49088009-49088106:+	Y	N	-5.61201	2.14216e-38	1.41795e-35	-0.131754	ENSG00000124207	CSE1L
16:74628667-74630780:-	Y	Y	4.32061	2.42837e-38	1.60273e-35	0.320178	ENSG00000168411	RFWD3
3:57584465-57596605:-	Y	Y	2.53693	2.95944e-38	1.94758e-35	0.0339086	ENSG00000168374	ARF4
6:170544321-170544366:-	N	N	4.63897	2.98793e-38	1.96064e-35	0.173461	ENSG00000008018	PSMB1
6:4044024-4044226:+	Y	N	4.8612	3.636e-38	2.37902e-35	0.625386	ENSG00000112739	PRPF4B
8:73292798-73292881:-	Y	Y	4.02507	3.93538e-38	2.5675e-35	0.528545	ENSG00000147604	RPL7
2:73237688-73239071:+	Y	Y	3.63241	4.27034e-38	2.77806e-35	0.0153372	ENSG00000135624	CCT7
14:102009382-102009842:+	Y	N	3.79527	4.36577e-38	2.83202e-35	0.0720332	ENSG00000197102	DYNC1H1
16:20915715-20920121:+	Y	Y	3.66478	4.46851e-38	2.89041e-35	0.118701	ENSG00000102897	LYRM1
13:45338798-45339496:-	Y	N	3.75293	8.13405e-38	5.24648e-35	0.0332632	ENSG00000133112	TPT1
13:48459834-48463730:+	Y	Y	3.44988	8.41806e-38	5.41429e-35	0.0492662	ENSG00000139687	RB1
17:1681055-1681477:-	Y	Y	4.2438	9.00953e-38	5.77834e-35	0.235233	ENSG00000174231	PRPF8
1:1393461-1395184:-	Y	Y	2.38104	1.08282e-37	6.92426e-35	0.167896	ENSG00000221978	CCNL2
20:58987970-58988913:+	Y	Y	3.18604	1.08572e-37	6.92426e-35	0.149204	ENSG00000101158	NELFCD
11:130139656-130140397:+	Y	Y	4.47028	1.23441e-37	7.85047e-35	0.29874	ENSG00000084234	APLP2
2:42295517-42301240:+	Y	Y	2.95137	1.34827e-37	8.5506e-35	0.0740352	ENSG00000143924	EML4
17:27307744-27307789:+	Y	N	3.4041	1.5185e-37	9.60338e-35	0.531163	ENSG00000109046	WSB1
16:28825921-28826184:+	Y	N	3.75952	1.56183e-37	9.84998e-35	0.207444	ENSG00000168488	ATXN2L
5:6611086-6611724:-	Y	Y	4.66871	1.66379e-37	1.0464e-34	0.335262	ENSG00000037474	NSUN2
10:78038556-78040200:+	Y	N	1.96741	1.80016e-37	1.12903e-34	0.0537738	ENSG00000138326	RPS24
19:3983292-3983856:-	Y	Y	3.26873	1.91101e-37	1.19526e-34	0.0409164	ENSG00000167658	EEF2
1:11017008-11018373:+	Y	Y	6.03509	2.01393e-37	1.25617e-34	0.342335	ENSG00000120948	TARDBP
17:76558601-76558790:+	Y	N	3.64807	2.32876e-37	1.44856e-34	0.221231	ENSG00000163597	SNHG16
12:76049465-76049525:-	Y	N	2.73736	2.33815e-37	1.45043e-34	0.408258	ENSG00000187109	NAP1L1
11:103066568-103079908:-	Y	Y	3.13283	2.40487e-37	1.48371e-34	0.138412	ENSG00000137692	DCUN1D5
15:41750616-41752318:+	Y	N	5.16302	2.40055e-37	1.48371e-34	0.408054	ENSG00000174197	MGA
22:41903156-41904534:+	Y	Y	3.43974	2.41708e-37	1.4872e-34	0.264457	ENSG00000198911	SREBF2
7:139265463-139266332:+	Y	Y	3.76472	2.49744e-37	1.53249e-34	0.265858	ENSG00000157741	UBN2
17:39995528-39996120:+	Y	N	3.46337	3.44637e-37	2.10908e-34	0.163818	ENSG00000108344	PSMD3
9:132269703-132271709:-	Y	Y	4.11405	4.59732e-37	2.80586e-34	0.214034	ENSG00000107290	SETX
16:3740550-3743468:-	Y	N	3.77318	5.36224e-37	3.26394e-34	0.183737	ENSG00000005339	CREBBP
6:35469028-35469285:+	Y	N	2.2667	5.38993e-37	3.27202e-34	0.186134	ENSG00000198755	RPL10A
1:19092919-19093312:-	Y	Y	5.05776	5.83142e-37	3.53059e-34	0.557688	ENSG00000127481	UBR4
1:165903993-165904167:+	Y	N	4.22324	6.10493e-37	3.68636e-34	0.304148	ENSG00000143179	UCK2
17:57676987-57677059:+	Y	N	-4.69533	6.54237e-37	3.94001e-34	-0.130167	ENSG00000153944	MSI2
2:127502873-127503386:-	Y	Y	6.11216	6.56296e-37	3.94196e-34	0.645558	ENSG00000163166	IWS1
16:70528663-70528872:+	N	N	6.13936	6.73686e-37	4.03573e-34	0.456067	ENSG00000189091	SF3B3
14:67653499-67656411:-	Y	Y	3.96213	7.46617e-37	4.46086e-34	0.0480219	ENSG00000100568	VTI1B
22:31425212-31425405:+	N	N	4.32459	7.93503e-37	4.72855e-34	0.423509	ENSG00000185721	DRG1
10:63186384-63189167:-	Y	Y	4.4351	8.00303e-37	4.75658e-34	0.314293	ENSG00000171988	JMJD1C
3:154284988-154288865:-	Y	Y	4.92688	8.35741e-37	4.95424e-34	0.339528	ENSG00000174953	DHX36
10:75229702-75230410:+	Y	Y	3.8894	8.53248e-37	5.04485e-34	0.124558	ENSG00000165637	VDAC2
6:79026165-79042619:-	Y	Y	3.43614	9.01237e-37	5.31475e-34	0.177405	ENSG00000146247	PHIP
17:76559044-76560433:+	Y	N	3.21922	9.47597e-37	5.57366e-34	0.0797199	ENSG00000163597	SNHG16
6:44426725-44429712:+	Y	Y	3.96851	9.69691e-37	5.68888e-34	0.367338	ENSG00000096401	CDC5L
1:156137296-156137461:+	Y	N	4.69499	1.38757e-36	8.11947e-34	0.46473	ENSG00000160789	LMNA
17:59661644-59663841:+	Y	Y	2.26592	1.44539e-36	8.43606e-34	0.0208187	ENSG00000141367	CLTC
1:156137268-156137295:+	Y	N	4.95884	1.58189e-36	9.20908e-34	0.497955	ENSG00000160789	LMNA
5:179833438-179833586:+	Y	Y	3.85458	1.60497e-36	9.31951e-34	0.284616	ENSG00000161011	SQSTM1
5:134176720-134176854:-	Y	N	3.91691	1.83999e-36	1.0657e-33	0.339137	ENSG00000113558	SKP1
11:119278714-119284968:+	Y	Y	3.75539	2.107e-36	1.21724e-33	0.121084	ENSG00000110395	CBL
6:108993017-108994461:-	Y	Y	6.86736	2.15197e-36	1.24007e-33	0.726508	ENSG00000080546	SESN1
5:32591688-32594570:+	Y	Y	2.31926	2.3882e-36	1.37271e-33	0.0255362	ENSG00000113387	SUB1
1:211942112-211944783:-	Y	Y	2.78784	2.61922e-36	1.50169e-33	0.183703	ENSG00000143493	INTS7
10:75221109-75221166:+	N	N	4.475	2.88869e-36	1.65202e-33	0.330539	ENSG00000165637	VDAC2
1:155380132-155395458:-	Y	Y	4.2308	2.99152e-36	1.70653e-33	0.272552	ENSG00000116539	ASH1L
6:157133208-157140612:+	Y	Y	3.85242	3.06626e-36	1.74478e-33	0.143533	ENSG00000049618	ARID1B
1:11018454-11018732:+	Y	Y	4.93384	3.13985e-36	1.78219e-33	0.469861	ENSG00000120948	TARDBP
3:130703889-130705560:-	Y	Y	5.51223	3.70063e-36	2.09525e-33	0.503363	ENSG00000196455	PIK3R4
20:32839857-32846617:+	Y	Y	3.37554	4.7179e-36	2.66457e-33	0.0419378	ENSG00000101367	MAPRE1
8:103066448-103068651:+	Y	Y	4.40031	5.66643e-36	3.19234e-33	0.188599	ENSG00000155097	ATP6V1C1
9:137241830-137241910:+	Y	Y	2.36943	5.98695e-36	3.36456e-33	0.368691	ENSG00000188229	TUBB4B
1:156123142-156123395:+	Y	N	3.99433	6.07529e-36	3.40578e-33	0.204587	ENSG00000160789	LMNA
8:47818539-47819401:-	Y	Y	3.49676	7.28772e-36	4.0754e-33	0.21019	ENSG00000253729	PRKDC
10:77812378-77812773:-	N	N	5.52087	7.3677e-36	4.11e-33	0.463273	ENSG00000151208	DLG5
7:100888035-100888041:+	Y	N	4.86946	7.40128e-36	4.11861e-33	0.664192	ENSG00000087087	SRRT
19:10392776-10393084:-	Y	N	3.7281	8.20268e-36	4.55341e-33	0.18533	ENSG00000105401	CDC37
16:2256867-2258756:-	Y	N	2.20372	9.13765e-36	5.06005e-33	0.0379126	ENSG00000205937	RNPS1
2:241238788-241239601:-	Y	Y	2.55936	9.48881e-36	5.24173e-33	0.040641	ENSG00000115677	HDLBP
5:138557497-138557868:-	Y	N	4.34091	9.93373e-36	5.47418e-33	0.202518	ENSG00000113013	HSPA9
19:10330527-10333288:-	Y	Y	2.81895	1.06199e-35	5.83813e-33	0.152588	ENSG00000161847	RAVER1
1:26778099-26779022:+	Y	N	2.51892	1.30706e-35	7.16804e-33	0.166631	ENSG00000117713	ARID1A
X:124085761-124086546:+	Y	Y	6.419	1.38219e-35	7.56176e-33	0.584482	ENSG00000101972	STAG2
7:11013907-11014906:+	Y	Y	3.5792	1.48728e-35	8.11718e-33	0.175539	ENSG00000106443	PHF14
12:108544533-108544944:-	Y	N	4.05369	1.49837e-35	8.15805e-33	0.555815	ENSG00000075856	SART3
17:75849740-75851199:-	Y	Y	2.92859	1.50664e-35	8.18347e-33	0.112013	ENSG00000132471	WBP2
17:18195036-18206560:+	Y	Y	2.57339	1.603e-35	8.68606e-33	0.0341006	ENSG00000091542	ALKBH5
10:69133048-69155811:+	Y	Y	3.38403	1.67104e-35	9.03322e-33	0.0803548	ENSG00000122958	VPS26A
7:130117667-130120748:+	Y	Y	4.02169	1.74798e-35	9.4267e-33	0.229533	ENSG00000128607	KLHDC10
22:41900499-41902969:+	Y	Y	3.22706	1.83912e-35	9.89471e-33	0.228982	ENSG00000198911	SREBF2
11:62598142-62598288:-	Y	N	3.20285	2.03054e-35	1.08987e-32	0.398225	ENSG00000149480	MTA2
15:78607525-78617023:-	Y	Y	-1.74041	2.07879e-35	1.11314e-32	-0.00586257	ENSG00000080644	CHRNA3
17:27304912-27306781:+	Y	Y	4.02652	2.36508e-35	1.26346e-32	0.323948	ENSG00000109046	WSB1
17:27307920-27307992:+	Y	N	3.4506	2.60297e-35	1.38728e-32	0.531733	ENSG00000109046	WSB1
17:62553756-62560015:+	Y	Y	2.98316	3.36552e-35	1.78949e-32	0.0703023	ENSG00000146872	TLK2
19:12948814-12949080:+	Y	N	2.46164	3.43893e-35	1.82425e-32	0.333245	ENSG00000179262	RAD23A
17:82093772-82094103:-	Y	Y	2.76544	3.54655e-35	1.87695e-32	0.204662	ENSG00000169710	FASN
10:110894523-110895947:+	Y	Y	3.85624	3.6718e-35	1.93872e-32	0.209816	ENSG00000150593	PDCD4
6:159784068-159784665:-	Y	Y	2.30087	4.14682e-35	2.18445e-32	0.0807192	ENSG00000120438	TCP1
13:59971161-59974351:-	Y	Y	4.66886	4.27556e-35	2.24705e-32	0.31308	ENSG00000139734	DIAPH3
5:94691195-94691563:+	Y	N	5.11338	4.40234e-35	2.30834e-32	0.646183	ENSG00000133302	SLF1
16:3736816-3736999:-	Y	N	5.52541	4.53762e-35	2.37379e-32	0.72412	ENSG00000005339	CREBBP
2:229840928-229858771:-	Y	Y	2.87887	4.66639e-35	2.43554e-32	0.0370356	ENSG00000153827	TRIP12
X:16869255-16869493:-	Y	Y	4.52914	5.09983e-35	2.65567e-32	0.220293	ENSG00000102054	RBBP7
6:26158608-26170974:+	Y	Y	2.84229	5.74751e-35	2.98609e-32	0.134144	ENSG00000158373	H2BC5
13:99547105-99549164:+	Y	Y	4.18542	6.33085e-35	3.28165e-32	0.216805	ENSG00000125304	TM9SF2
19:10391707-10392775:-	Y	Y	3.34438	6.55579e-35	3.39051e-32	0.100998	ENSG00000105401	CDC37
16:70527376-70527429:+	N	N	5.99778	7.16469e-35	3.697e-32	0.554111	ENSG00000189091	SF3B3
1:45600458-45602254:+	Y	Y	4.86203	7.59386e-35	3.90155e-32	0.309141	ENSG00000132780	NASP
12:50086918-50087362:+	Y	Y	2.81549	7.59548e-35	3.90155e-32	0.209112	ENSG00000066117	SMARCD1
4:173527740-173527888:-	N	N	1.59859	8.77514e-35	4.49733e-32	0.147097	ENSG00000164107	HAND2
5:159159036-159161140:-	Y	Y	3.56345	8.97482e-35	4.58931e-32	0.175373	ENSG00000145860	RNF145
1:186314725-186317481:-	Y	Y	2.95443	1.01728e-34	5.19021e-32	0.126809	ENSG00000047410	TPR
6:17662071-17662820:-	N	N	6.21294	1.12203e-34	5.71181e-32	0.600848	ENSG00000124789	NUP153
22:40835950-40840625:-	Y	Y	3.95408	1.18482e-34	6.01797e-32	0.0719015	ENSG00000100380	ST13
10:21728676-21730899:+	Y	Y	6.0674	1.22925e-34	6.2297e-32	0.695553	ENSG00000078403	MLLT10
1:224419445-224419517:-	Y	N	4.41279	1.29856e-34	6.56628e-32	0.403113	ENSG00000162923	WDR26
8:47966408-47967031:+	Y	N	2.20476	1.38554e-34	6.99056e-32	0.112344	ENSG00000104738	MCM4
17:29530739-29534117:+	Y	Y	3.75696	1.47143e-34	7.40743e-32	0.157196	ENSG00000160551	TAOK1
1:77965232-77966693:-	Y	Y	2.40537	1.48642e-34	7.46631e-32	0.0566611	ENSG00000162613	FUBP1
6:87534859-87541917:-	Y	Y	2.73381	1.62319e-34	8.13536e-32	0.0439919	ENSG00000146282	RARS2
19:52216664-52219690:+	Y	Y	2.95578	1.68514e-34	8.42721e-32	0.0256	ENSG00000105568	PPP2R1A
X:154368091-154370872:-	Y	Y	2.82421	1.79002e-34	8.93206e-32	0.0581893	ENSG00000196924	FLNA
17:76560434-76561035:+	Y	Y	3.24281	1.90755e-34	9.49761e-32	0.0621078	ENSG00000163597	SNHG16
22:29287135-29288605:+	Y	Y	2.49749	2.03544e-34	1.01122e-31	0.146381	ENSG00000182944	EWSR1
4:39849653-39862218:-	Y	Y	2.57136	2.1142e-34	1.04806e-31	0.0440551	ENSG00000121892	PDS5A
21:28971445-28981118:-	Y	Y	3.90369	2.44913e-34	1.21144e-31	0.306456	ENSG00000198862	LTN1
12:56273255-56273586:-	Y	N	3.07917	2.81435e-34	1.38907e-31	0.0793979	ENSG00000062485	CS
2:53906694-53906805:-	Y	Y	4.74441	3.22246e-34	1.58705e-31	0.37797	ENSG00000068878	PSME4
19:44962076-44973086:+	Y	Y	2.49733	3.53274e-34	1.7361e-31	0.0146678	ENSG00000104853	CLPTM1
19:49678273-49679774:+	Y	Y	2.96953	3.62233e-34	1.77628e-31	0.0132796	ENSG00000126457	PRMT1
17:59687001-59687021:+	Y	N	3.22521	3.75489e-34	1.83731e-31	0.445007	ENSG00000141367	CLTC
14:73727134-73727457:-	Y	N	5.61808	3.85867e-34	1.88404e-31	0.726231	ENSG00000156030	MIDEAS
17:82089727-82090374:-	Y	Y	2.32701	3.90795e-34	1.904e-31	0.176406	ENSG00000169710	FASN
1:50129032-50141771:+	Y	Y	-2.73141	4.00723e-34	1.94819e-31	-0.0204199	ENSG00000162374	ELAVL4
1:160211717-160213109:+	Y	Y	2.58994	4.16576e-34	2.02094e-31	0.149792	ENSG00000162734	PEA15
10:119051322-119056739:-	Y	Y	3.00561	4.39326e-34	2.12676e-31	0.121988	ENSG00000107581	EIF3A
16:48270275-48277337:+	Y	Y	3.48103	5.46435e-34	2.63964e-31	0.115605	ENSG00000102910	LONP2
21:29066778-29066890:-	Y	N	2.79072	5.47626e-34	2.63978e-31	0.197495	ENSG00000156261	CCT8
1:37700522-37701753:+	Y	Y	3.35034	5.75969e-34	2.77052e-31	0.172285	ENSG00000134690	CDCA8
12:103934288-103936426:+	Y	N	3.06925	5.84831e-34	2.8072e-31	0.0526208	ENSG00000166598	HSP90B1
8:47877852-47879490:-	Y	Y	3.84978	6.10534e-34	2.92439e-31	0.0577577	ENSG00000253729	PRKDC
1:45602366-45604916:+	Y	Y	2.9372	6.13218e-34	2.93106e-31	0.107704	ENSG00000132780	NASP
9:125341865-125342106:+	Y	N	4.64699	6.64357e-34	3.16883e-31	0.574463	ENSG00000165219	GAPVD1
5:149531512-149549327:-	Y	Y	1.85272	6.66212e-34	3.17101e-31	0.0141489	ENSG00000113712	CSNK1A1
X:51898644-51900181:+	Y	N	2.9008	6.75791e-34	3.20988e-31	0.0265817	ENSG00000179222	MAGED1
19:46728008-46728126:-	Y	N	3.1243	7.15579e-34	3.39177e-31	0.388839	ENSG00000090372	STRN4
5:132885120-132886309:-	Y	Y	3.29068	7.78382e-34	3.68176e-31	0.208209	ENSG00000072364	AFF4
1:50145198-50177088:+	Y	Y	-2.67186	7.97148e-34	3.76269e-31	-0.0150812	ENSG00000162374	ELAVL4
21:31663887-31666448:+	Y	Y	2.58974	8.68434e-34	4.09066e-31	0.039199	ENSG00000142168	SOD1
1:3785204-3786848:-	Y	Y	2.90881	9.52992e-34	4.47968e-31	0.199457	ENSG00000130764	LRRC47
8:103439482-103440135:+	Y	N	3.47435	9.57606e-34	4.49206e-31	0.199654	ENSG00000164934	DCAF13
X:123671762-123686547:-	Y	Y	3.79625	9.80964e-34	4.59214e-31	0.146063	ENSG00000125676	THOC2
1:77964357-77964645:-	Y	Y	3.61153	1.06344e-33	4.96801e-31	0.158311	ENSG00000162613	FUBP1
19:49098705-49101389:+	Y	Y	4.04664	1.09138e-33	5.08806e-31	0.284778	ENSG00000104852	SNRNP70
7:2367046-2367119:+	Y	N	3.34096	1.11135e-33	5.17052e-31	0.353901	ENSG00000106263	EIF3B
5:136174633-136177336:+	Y	Y	4.63851	1.28805e-33	5.98036e-31	0.243365	ENSG00000113658	SMAD5
17:81869076-81869165:-	Y	Y	3.54809	1.33714e-33	6.19565e-31	0.0686811	ENSG00000141522	ARHGDIA
7:98137443-98141396:+	Y	Y	4.0855	1.3527e-33	6.25496e-31	0.264016	ENSG00000164715	LMTK2
8:130118780-130124012:-	Y	Y	2.94056	1.40732e-33	6.49431e-31	0.0764978	ENSG00000153317	ASAP1
19:8465516-8466234:+	Y	Y	5.04343	1.44462e-33	6.65289e-31	0.250805	ENSG00000099783	HNRNPM
1:156137233-156137267:+	Y	N	4.51124	1.46844e-33	6.7489e-31	0.485165	ENSG00000160789	LMNA
7:6026435-6026552:-	Y	N	3.76106	1.4756e-33	6.7681e-31	0.1597	ENSG00000086232	EIF2AK1
5:95763621-95767754:+	Y	Y	3.3976	1.51055e-33	6.91446e-31	0.0792588	ENSG00000164292	RHOBTB3
7:1495554-1496155:-	Y	Y	2.61376	1.51631e-33	6.92686e-31	0.179971	ENSG00000164880	INTS1
19:15403319-15403474:-	Y	N	4.68235	1.59031e-33	7.25031e-31	0.578175	ENSG00000011243	AKAP8L
16:21963213-21965407:+	Y	Y	3.21013	1.68214e-33	7.65361e-31	0.0474378	ENSG00000140740	UQCRC2
17:75001490-75001874:+	N	N	3.97801	1.73169e-33	7.8633e-31	0.418428	ENSG00000109089	CDR2L
7:5219032-5222601:+	Y	Y	2.74191	1.99456e-33	9.03888e-31	0.060799	ENSG00000157954	WIPI2
13:45339849-45339993:-	Y	N	3.40641	2.00801e-33	9.08167e-31	0.042411	ENSG00000133112	TPT1
2:218265726-218265830:-	Y	N	3.35428	2.05618e-33	9.28104e-31	0.459388	ENSG00000127837	AAMP
10:21728632-21728675:+	N	N	6.15587	2.06859e-33	9.31856e-31	0.783702	ENSG00000078403	MLLT10
17:48076179-48076864:-	Y	Y	3.67859	2.11908e-33	9.5271e-31	0.120026	ENSG00000108468	CBX1
1:19144908-19145792:-	Y	Y	4.49807	2.14286e-33	9.60059e-31	0.49908	ENSG00000127481	UBR4
8:30065712-30065873:-	Y	N	3.08971	2.14388e-33	9.60059e-31	0.0885059	ENSG00000133872	SARAF
1:151400589-151400713:+	Y	N	2.42477	2.23156e-33	9.97353e-31	0.23573	ENSG00000159377	PSMB4
7:139265183-139265462:+	N	N	4.92019	2.46165e-33	1.09803e-30	0.377777	ENSG00000157741	UBN2
8:30063914-30065711:-	Y	Y	2.8291	2.59648e-33	1.1559e-30	0.046479	ENSG00000133872	SARAF
8:47789239-47794289:-	Y	Y	4.23285	2.79866e-33	1.24346e-30	0.0684446	ENSG00000253729	PRKDC
19:54128378-54129056:+	Y	Y	2.88018	3.02028e-33	1.33931e-30	0.313609	ENSG00000105618	PRPF31
14:89185874-89190381:-	Y	Y	3.6292	3.13885e-33	1.38647e-30	0.123886	ENSG00000053254	FOXN3
15:50494281-50495847:+	Y	Y	4.71331	3.13775e-33	1.38647e-30	0.309527	ENSG00000138592	USP8
14:75147898-75148944:-	Y	Y	4.26747	3.28847e-33	1.44974e-30	0.0724108	ENSG00000170348	TMED10
18:13742653-13743074:+	Y	N	5.99996	3.66129e-33	1.61097e-30	0.633545	ENSG00000101654	RNMT
17:82097528-82098120:-	Y	Y	2.39825	3.69506e-33	1.62269e-30	0.139661	ENSG00000169710	FASN
1:50109965-50120844:+	Y	Y	-2.73256	3.75671e-33	1.64658e-30	-0.0372766	ENSG00000162374	ELAVL4
5:139365091-139368732:+	Y	Y	3.34987	3.80071e-33	1.66265e-30	0.10098	ENSG00000120727	PAIP2
9:121774413-121776197:+	Y	Y	5.05	3.92957e-33	1.71572e-30	0.637052	ENSG00000136848	DAB2IP
16:50754425-50775165:+	Y	Y	4.38957	4.51832e-33	1.96899e-30	0.201053	ENSG00000083799	CYLD
1:41007546-41008658:+	Y	Y	3.14706	4.7862e-33	2.08173e-30	0.194882	ENSG00000171793	CTPS1
2:128171391-128172572:+	Y	Y	3.76148	4.8059e-33	2.0863e-30	0.196606	ENSG00000136731	UGGT1
19:46728332-46728406:-	Y	N	6.34109	5.65364e-33	2.44963e-30	0.334022	ENSG00000090372	STRN4
5:179708978-179709059:+	Y	N	-5.14152	6.60273e-33	2.85541e-30	-0.0552921	ENSG00000127022	CANX
X:53195411-53195915:-	Y	Y	4.07446	6.78719e-33	2.9296e-30	0.172757	ENSG00000126012	KDM5C
19:2434106-2434294:-	Y	Y	4.3711	7.00147e-33	3.01636e-30	0.341802	ENSG00000176619	LMNB2
11:20078105-20080063:+	Y	Y	3.58374	8.45687e-33	3.63647e-30	0.264926	ENSG00000166833	NAV2
X:53215714-53215794:-	Y	N	4.99263	8.56237e-33	3.67488e-30	0.339144	ENSG00000126012	KDM5C
17:64502585-64502729:-	Y	N	3.31706	8.70623e-33	3.72957e-30	0.350223	ENSG00000108654	DDX5
15:41752319-41754436:+	Y	Y	4.62874	8.78443e-33	3.75598e-30	0.376323	ENSG00000174197	MGA
22:35265604-35283961:+	Y	Y	5.88092	9.57962e-33	4.08828e-30	0.713214	ENSG00000100281	HMGXB4
12:120770138-120782654:-	Y	Y	3.73095	9.70494e-33	4.134e-30	0.118012	ENSG00000157837	SPPL3
4:41263292-41264102:+	Y	Y	2.11542	9.87043e-33	4.19661e-30	0.0183824	ENSG00000154277	UCHL1
17:67179737-67188217:-	Y	Y	3.83937	1.03395e-32	4.38783e-30	0.258908	ENSG00000198265	HELZ
12:350780-352204:-	Y	Y	4.97441	1.26138e-32	5.34299e-30	0.362393	ENSG00000073614	KDM5A
7:6028698-6028839:-	Y	N	4.61461	1.44581e-32	6.11279e-30	0.108821	ENSG00000086232	EIF2AK1
2:10589752-10600852:-	Y	Y	3.75711	1.4522e-32	6.12843e-30	0.118968	ENSG00000115761	NOL10
3:184299402-184299633:+	Y	N	3.79713	1.53662e-32	6.47265e-30	0.309571	ENSG00000175166	PSMD2
19:49685305-49685555:+	Y	N	2.45496	1.57725e-32	6.63149e-30	0.0774104	ENSG00000126457	PRMT1
14:101964948-101975711:+	Y	Y	2.34146	1.63414e-32	6.85797e-30	0.0343808	ENSG00000197102	DYNC1H1
6:4044227-4047174:+	Y	Y	4.50234	1.73332e-32	7.26078e-30	0.409079	ENSG00000112739	PRPF4B
5:10394144-10394752:+	Y	Y	4.25056	1.74685e-32	7.304e-30	0.107808	ENSG00000145495	MARCHF6
7:131445904-131463216:+	Y	Y	4.10618	1.77853e-32	7.4228e-30	0.276089	ENSG00000128585	MKLN1
14:69768929-69769122:+	Y	N	2.6824	1.8799e-32	7.83147e-30	0.361526	ENSG00000100650	SRSF5
20:2462762-2463088:-	Y	Y	2.64923	2.0795e-32	8.64711e-30	0.064695	ENSG00000125835	SNRPB
18:669174-669464:+	Y	N	2.97477	2.43405e-32	1.01029e-29	0.151713	ENSG00000176890	TYMS
1:154157722-154158608:-	Y	N	2.13429	2.48668e-32	1.03025e-29	0.0308756	ENSG00000143549	TPM3
19:47751108-47751519:+	Y	N	3.10613	2.6611e-32	1.10051e-29	0.0996393	ENSG00000105373	NOP53
1:155256792-155257284:-	Y	Y	2.26298	2.71489e-32	1.12071e-29	0.0784623	ENSG00000116521	SCAMP3
9:132898980-132900714:-	Y	N	6.1678	2.93866e-32	1.21088e-29	0.66318	ENSG00000165699	TSC1
8:55998500-55999417:+	Y	Y	3.66148	3.05296e-32	1.2557e-29	0.137835	ENSG00000254087	LYN
8:102834748-102835475:-	Y	N	2.89804	3.46413e-32	1.42224e-29	0.125293	ENSG00000155096	AZIN1
11:72023148-72024070:-	Y	Y	3.8214	3.77831e-32	1.54843e-29	0.184507	ENSG00000137497	NUMA1
1:154266452-154266500:+	Y	N	4.01206	3.8003e-32	1.55464e-29	0.449838	ENSG00000143569	UBAP2L
15:57707211-57707466:+	Y	Y	4.48177	3.93517e-32	1.60691e-29	0.42815	ENSG00000255529	POLR2M
1:28230253-28232920:-	Y	Y	3.52612	4.18171e-32	1.70147e-29	0.0662805	ENSG00000126698	DNAJC8
19:38381313-38382116:+	Y	N	2.49404	4.17613e-32	1.70147e-29	0.0458174	ENSG00000099341	PSMD8
17:50383236-50385117:-	Y	Y	2.551	4.33111e-32	1.75911e-29	0.0281593	ENSG00000108829	LRRC59
12:108542852-108543027:-	N	N	4.74383	4.39039e-32	1.78e-29	0.655027	ENSG00000075856	SART3
1:167412305-167413025:+	Y	Y	4.35557	4.42107e-32	1.78924e-29	0.414852	ENSG00000143190	POU2F1
6:31531672-31531744:-	Y	N	2.66404	4.44648e-32	1.79632e-29	0.376767	ENSG00000198563	DDX39B
6:159788697-159788868:-	Y	N	3.22031	4.83824e-32	1.95112e-29	0.167905	ENSG00000120438	TCP1
5:115130890-115133859:-	Y	Y	4.3979	5.73916e-32	2.31033e-29	0.393196	ENSG00000152503	TRIM36
2:43915057-43916887:-	Y	N	3.53887	6.32153e-32	2.54026e-29	0.0447235	ENSG00000138095	LRPPRC
2:62864972-62872037:+	Y	Y	3.763	6.38201e-32	2.56003e-29	0.086037	ENSG00000115504	EHBP1
6:170535406-170537233:-	Y	Y	2.37445	6.85499e-32	2.74491e-29	0.0497206	ENSG00000008018	PSMB1
5:140484760-140485120:+	Y	N	4.88265	7.00722e-32	2.80093e-29	0.592062	ENSG00000131503	ANKHD1
2:55581699-55585050:-	Y	Y	5.88785	7.05918e-32	2.81674e-29	0.361341	ENSG00000275052	PPP4R3B
17:76558374-76558600:+	Y	N	2.84338	7.27132e-32	2.89629e-29	0.203691	ENSG00000163597	SNHG16
6:31627199-31627764:+	Y	Y	2.43906	7.77451e-32	3.0913e-29	0.0636973	ENSG00000204469	PRRC2A
8:73292882-73292922:-	Y	N	3.75601	8.08821e-32	3.21041e-29	0.479221	ENSG00000147604	RPL7
19:10678653-10678704:+	Y	N	-3.05669	9.31027e-32	3.68903e-29	-0.103787	ENSG00000129351	ILF3
1:8871987-8873772:-	Y	Y	1.86848	9.82815e-32	3.88744e-29	0.0072531	ENSG00000074800	ENO1
4:24528042-24529600:-	Y	Y	3.48322	9.99514e-32	3.94662e-29	0.129407	ENSG00000109606	DHX15
19:46728300-46728315:-	Y	N	5.82203	1.02217e-31	4.02905e-29	0.338299	ENSG00000090372	STRN4
2:53869539-53870960:-	Y	N	3.67993	1.03776e-31	4.08343e-29	0.338377	ENSG00000068878	PSME4
3:155922303-155925240:+	Y	Y	3.03273	1.05248e-31	4.13417e-29	0.0339071	ENSG00000163655	GMPS
5:179821551-179821567:+	Y	N	4.2363	1.10302e-31	4.32525e-29	0.354735	ENSG00000161011	SQSTM1
10:106629390-106652381:-	Y	Y	3.5293	1.11295e-31	4.35666e-29	0.0664504	ENSG00000108018	SORCS1
11:47827195-47835650:-	Y	Y	2.78811	1.13249e-31	4.42552e-29	0.067604	ENSG00000030066	NUP160
9:92070404-92076797:-	Y	Y	3.23362	1.27635e-31	4.97909e-29	0.0830081	ENSG00000090054	SPTLC1
15:49139654-49144226:-	Y	Y	3.8321	1.39708e-31	5.44072e-29	0.115089	ENSG00000166200	COPS2
3:9441742-9442127:+	Y	N	3.59565	1.44609e-31	5.62196e-29	0.356011	ENSG00000168137	SETD5
1:156129909-156130616:+	Y	Y	3.36576	1.59831e-31	6.2031e-29	0.111821	ENSG00000160789	LMNA
8:47827155-47828167:-	Y	N	3.90498	1.70771e-31	6.61638e-29	0.29415	ENSG00000253729	PRKDC
2:135755692-135761817:+	Y	Y	3.79501	1.76483e-31	6.81443e-29	0.275533	ENSG00000144224	UBXN4
3:196052185-196052697:-	Y	Y	4.95374	1.76223e-31	6.81443e-29	0.223689	ENSG00000072274	TFRC
2:43933441-43934187:-	Y	N	2.96159	1.86594e-31	7.1926e-29	0.0558367	ENSG00000138095	LRPPRC
6:83398517-83407767:-	Y	Y	3.76307	1.88271e-31	7.2327e-29	0.0986981	ENSG00000065833	ME1
18:63334923-63335099:-	N	N	5.76199	1.8824e-31	7.2327e-29	0.598571	ENSG00000119537	KDSR
16:28833509-28833855:+	Y	Y	2.79344	1.97223e-31	7.56381e-29	0.212337	ENSG00000168488	ATXN2L
X:77521499-77522262:-	Y	N	3.75282	1.98064e-31	7.58324e-29	0.450067	ENSG00000085224	ATRX
5:122799856-122801868:+	Y	Y	3.68836	2.10242e-31	8.03597e-29	0.112234	ENSG00000205302	SNX2
6:160036726-160040559:+	Y	Y	3.48369	2.38723e-31	9.10923e-29	0.18807	ENSG00000197081	IGF2R
1:226065810-226065817:+	Y	N	3.00246	2.51188e-31	9.56878e-29	0.303624	ENSG00000163041	H3-3A
4:124672535-124678675:-	Y	Y	6.5413	2.72056e-31	1.03464e-28	0.807117	ENSG00000151458	ANKRD50
1:32781146-32782103:-	Y	N	3.37429	2.94805e-31	1.11928e-28	0.166935	ENSG00000134684	YARS1
1:37540756-37541594:-	Y	N	5.00521	3.02031e-31	1.1448e-28	0.500516	ENSG00000163877	SNIP1
X:153692793-153693040:+	Y	N	2.72608	3.23451e-31	1.22394e-28	0.352219	ENSG00000130821	SLC6A8
1:220114475-220125236:+	Y	Y	2.76739	3.31483e-31	1.25127e-28	0.0597417	ENSG00000067704	IARS2
18:12949908-12951854:+	Y	Y	3.52334	3.31775e-31	1.25127e-28	0.0865877	ENSG00000085415	SEH1L
3:139349435-139350178:+	Y	N	3.82793	3.38067e-31	1.27289e-28	0.212829	ENSG00000175110	MRPS22
17:62601950-62602041:+	Y	Y	4.73853	3.60892e-31	1.35658e-28	0.481025	ENSG00000146872	TLK2
1:43167236-43168938:-	Y	Y	2.92115	4.29039e-31	1.61007e-28	0.0742994	ENSG00000117395	EBNA1BP2
6:75621972-75622750:+	Y	Y	3.85476	4.93198e-31	1.84779e-28	0.390463	ENSG00000112701	SENP6
2:190921204-190923916:+	Y	Y	2.6436	5.27516e-31	1.97311e-28	0.0499878	ENSG00000115419	GLS
1:32782104-32782403:-	Y	Y	3.65191	5.44147e-31	2.03197e-28	0.227571	ENSG00000134684	YARS1
X:77830896-77841245:-	Y	Y	3.14951	5.47868e-31	2.0425e-28	0.0216283	ENSG00000102158	MAGT1
2:43905781-43912431:-	Y	Y	2.68003	5.50864e-31	2.05031e-28	0.00991045	ENSG00000138095	LRPPRC
20:35304657-35306449:-	Y	Y	3.24027	6.63721e-31	2.46632e-28	0.363969	ENSG00000101019	UQCC1
6:31625612-31625753:+	Y	Y	2.35251	6.67387e-31	2.47589e-28	0.127073	ENSG00000204469	PRRC2A
2:169924174-169925618:+	Y	Y	5.17587	6.70947e-31	2.48503e-28	0.33501	ENSG00000144357	UBR3
5:179823565-179823857:+	Y	N	3.43309	6.74626e-31	2.49459e-28	0.284067	ENSG00000161011	SQSTM1
3:57577388-57583897:-	Y	Y	1.89262	6.90832e-31	2.55036e-28	0.0153478	ENSG00000168374	ARF4
12:67277443-67277653:+	N	N	4.82305	7.42483e-31	2.73659e-28	0.285146	ENSG00000111530	CAND1
17:28674614-28674748:+	Y	Y	6.06052	7.674e-31	2.82385e-28	0.69315	ENSG00000109111	SUPT6H
1:156251381-156251402:-	Y	N	3.04837	8.03425e-31	2.95162e-28	0.475291	ENSG00000198952	SMG5
3:170361430-170381243:+	Y	Y	2.79514	8.09803e-31	2.96546e-28	0.0902631	ENSG00000136603	SKIL
7:158696141-158696400:-	Y	N	3.7884	8.0902e-31	2.96546e-28	0.477566	ENSG00000146918	NCAPG2
7:74701104-74705163:+	Y	Y	2.2562	8.15977e-31	2.98326e-28	0.0389032	ENSG00000263001	GTF2I
6:163564711-163565945:+	Y	N	2.78644	8.53479e-31	3.11535e-28	0.184574	ENSG00000112531	QKI
17:40167652-40167849:+	N	N	3.39006	9.96395e-31	3.63118e-28	0.268252	ENSG00000108349	CASC3
3:139527343-139538320:-	Y	Y	-1.97987	1.02149e-30	3.71669e-28	-0.00869103	ENSG00000114115	RBP1
1:10413252-10415291:+	Y	Y	2.27883	1.05185e-30	3.82101e-28	0.0225843	ENSG00000142657	PGD
10:89762836-89768289:+	Y	Y	5.20966	1.07204e-30	3.88814e-28	0.457932	ENSG00000138182	KIF20B
17:66965132-66984593:+	Y	Y	-1.86898	1.07493e-30	3.89241e-28	-0.0123101	ENSG00000075461	CACNG4
3:184178224-184178856:+	Y	Y	2.61594	1.08266e-30	3.91416e-28	0.0526526	ENSG00000161203	AP2M1
7:82067257-82084768:-	Y	Y	2.88971	1.18991e-30	4.28824e-28	0.0977615	ENSG00000153956	CACNA2D1
X:47197199-47198166:+	Y	N	2.42708	1.1882e-30	4.28824e-28	0.24357	ENSG00000130985	UBA1
7:99040557-99042117:-	Y	Y	4.25881	1.21823e-30	4.38334e-28	0.358858	ENSG00000198742	SMURF1
1:153662796-153663018:-	Y	Y	2.99823	1.22646e-30	4.40596e-28	0.277927	ENSG00000143621	ILF2
12:56605328-56605829:-	Y	N	3.6921	1.31912e-30	4.73134e-28	0.24618	ENSG00000076108	BAZ2A
1:184726390-184732782:-	Y	Y	3.28735	1.46282e-30	5.2385e-28	0.145305	ENSG00000116406	EDEM3
17:82093020-82093218:-	Y	Y	2.32363	1.48876e-30	5.32299e-28	0.22337	ENSG00000169710	FASN
5:37307297-37307432:-	Y	N	-6.45195	1.50413e-30	5.3695e-28	-0.215864	ENSG00000113569	NUP155
17:59691314-59693727:+	Y	Y	2.85201	1.57621e-30	5.61798e-28	0.0317253	ENSG00000141367	CLTC
14:74085602-74091231:+	Y	Y	2.83754	1.72848e-30	6.15102e-28	0.0867993	ENSG00000205659	LIN52
18:63340936-63341080:-	N	N	5.96261	1.998e-30	7.09904e-28	0.598754	ENSG00000119537	KDSR
2:108783327-108783595:+	Y	N	4.81692	2.18145e-30	7.73874e-28	0.595015	ENSG00000153201	RANBP2
5:55948102-55948897:-	Y	N	4.90384	2.19013e-30	7.75739e-28	0.29109	ENSG00000134352	IL6ST
1:180022849-180024418:+	Y	Y	3.50116	2.32222e-30	8.21246e-28	0.299936	ENSG00000135837	CEP350
6:170550442-170553129:-	Y	Y	2.48559	2.35392e-30	8.31162e-28	0.152644	ENSG00000008018	PSMB1
20:32430862-32431176:+	Y	N	3.02866	2.40804e-30	8.48949e-28	0.397891	ENSG00000171456	ASXL1
5:55324706-55327529:+	Y	Y	2.83072	2.44666e-30	8.61227e-28	0.082467	ENSG00000039123	MTREX
9:136412200-136412489:+	Y	N	5.24406	2.45255e-30	8.61966e-28	0.415294	ENSG00000165688	PMPCA
8:47944462-47953619:-	Y	Y	2.74374	2.601e-30	9.12724e-28	0.0407449	ENSG00000253729	PRKDC
4:95216124-95216211:-	Y	N	-7.51704	2.6291e-30	9.21162e-28	-0.137564	ENSG00000182168	UNC5C
13:45339603-45339848:-	Y	N	3.37673	2.64038e-30	9.23688e-28	0.0266302	ENSG00000133112	TPT1
11:116847609-116849119:-	Y	Y	4.99052	2.7804e-30	9.71177e-28	0.358886	ENSG00000160584	SIK3
5:111731047-111734487:-	Y	Y	-2.7054	2.89307e-30	1.00898e-27	-0.0323857	ENSG00000134986	NREP
18:13743075-13746219:+	Y	Y	5.2098	3.15444e-30	1.09845e-27	0.56079	ENSG00000101654	RNMT
10:102144250-102144307:+	Y	N	-7.73164	3.16291e-30	1.09971e-27	-0.40018	ENSG00000148840	PPRC1
17:48110896-48111127:+	N	N	4.53295	3.29687e-30	1.14453e-27	0.28628	ENSG00000002919	SNX11
17:59651317-59655853:+	Y	Y	2.37877	3.53497e-30	1.22532e-27	0.0319924	ENSG00000141367	CLTC
6:75670721-75675434:+	Y	Y	3.07479	3.64181e-30	1.26043e-27	0.0820582	ENSG00000112701	SENP6
3:133623458-133624051:-	Y	Y	4.11864	3.66422e-30	1.26625e-27	0.263608	ENSG00000163781	TOPBP1
11:64196996-64197046:+	Y	N	4.12668	3.70511e-30	1.27844e-27	0.297626	ENSG00000168439	STIP1
7:6122201-6128137:+	Y	Y	3.08159	4.25104e-30	1.46458e-27	0.11678	ENSG00000106346	USP42
6:136269141-136269230:-	Y	N	5.65564	4.57889e-30	1.57515e-27	0.74336	ENSG00000029363	BCLAF1
12:21501949-21506884:+	Y	Y	3.88096	4.86645e-30	1.67154e-27	0.207535	ENSG00000111711	GOLT1B
16:58588907-58599009:-	Y	Y	2.62281	5.13307e-30	1.76045e-27	0.0244352	ENSG00000125107	CNOT1
11:68601970-68603341:+	Y	Y	3.58159	5.25563e-30	1.79976e-27	0.161646	ENSG00000110075	PPP6R3
19:42294460-42294574:+	Y	N	4.1687	5.83657e-30	1.99569e-27	0.351488	ENSG00000079432	CIC
7:81971865-81974454:-	Y	Y	4.72755	5.87724e-30	2.00658e-27	0.507323	ENSG00000153956	CACNA2D1
7:127997597-128008033:+	Y	Y	2.27385	6.64638e-30	2.26577e-27	0.0279532	ENSG00000197157	SND1
2:219181206-219181368:+	Y	N	3.37089	6.76801e-30	2.30377e-27	0.274397	ENSG00000144567	RETREG2
11:18096855-18103232:-	Y	Y	3.10683	6.80095e-30	2.31152e-27	0.143458	ENSG00000166788	SAAL1
X:153951708-153951840:-	Y	Y	3.36288	6.90301e-30	2.3427e-27	0.273485	ENSG00000172534	HCFC1
12:46365308-46366863:-	Y	Y	2.03854	6.93561e-30	2.35025e-27	0.0996353	ENSG00000134294	SLC38A2
X:77600756-77613260:-	Y	Y	3.39077	6.98067e-30	2.362e-27	0.129952	ENSG00000085224	ATRX
5:171400230-171400290:+	Y	N	3.4558	7.3794e-30	2.49319e-27	0.303138	ENSG00000181163	NPM1
7:81969985-81970674:-	Y	Y	2.83361	7.44099e-30	2.51027e-27	0.142168	ENSG00000153956	CACNA2D1
10:102354469-102357309:+	Y	N	3.71484	7.54808e-30	2.54262e-27	0.242358	ENSG00000107862	GBF1
5:138556867-138557341:-	Y	N	2.5491	7.58546e-30	2.54765e-27	0.142467	ENSG00000113013	HSPA9
12:104321317-104325336:+	Y	Y	2.86544	7.57489e-30	2.54765e-27	0.0320972	ENSG00000198431	TXNRD1
17:78798552-78798907:-	Y	Y	4.67888	8.07738e-30	2.70886e-27	0.533259	ENSG00000055483	USP36
9:133350384-133350455:+	Y	N	2.53791	8.48651e-30	2.84187e-27	0.085406	ENSG00000148303	RPL7A
7:129858970-129865014:-	Y	Y	2.75955	8.6987e-30	2.90863e-27	0.0600311	ENSG00000186591	UBE2H
14:22567165-22575058:-	Y	Y	2.21863	8.71169e-30	2.90869e-27	0.0157691	ENSG00000129562	DAD1
1:10411553-10412833:+	Y	Y	2.50515	8.92173e-30	2.97009e-27	0.0376984	ENSG00000142657	PGD
17:7845692-7845871:+	Y	Y	3.22287	8.91308e-30	2.97009e-27	0.294703	ENSG00000132510	KDM6B
2:37109501-37114730:-	Y	Y	4.2571	9.42569e-30	3.13326e-27	0.272326	ENSG00000055332	EIF2AK2
X:49199034-49200150:-	Y	Y	3.14575	9.86748e-30	3.27533e-27	0.0439308	ENSG00000102003	SYP
9:124384657-124396759:-	Y	Y	2.12818	9.992e-30	3.31182e-27	0.0137801	ENSG00000136930	PSMB7
7:103297954-103298567:+	Y	Y	3.1454	1.01441e-29	3.35732e-27	0.260692	ENSG00000105819	PMPCB
17:16058600-16061400:-	Y	Y	3.77101	1.0283e-29	3.39834e-27	0.218052	ENSG00000141027	NCOR1
X:154366851-154367396:-	Y	Y	2.68776	1.05783e-29	3.49085e-27	0.116142	ENSG00000196924	FLNA
14:102037794-102038377:+	Y	N	3.31674	1.14223e-29	3.7639e-27	0.142692	ENSG00000197102	DYNC1H1
17:66984755-67018188:+	Y	Y	-1.8132	1.14413e-29	3.7647e-27	-0.00737548	ENSG00000075461	CACNG4
5:115834353-115834917:-	Y	Y	3.60004	1.14703e-29	3.76878e-27	0.282684	ENSG00000145782	ATG12
9:13138154-13139904:-	Y	Y	4.06675	1.1507e-29	3.77539e-27	0.204442	ENSG00000107186	MPDZ
2:24726707-24728307:+	Y	Y	5.99043	1.19435e-29	3.91295e-27	0.499017	ENSG00000084676	NCOA1
3:184304392-184305767:+	Y	Y	2.57827	1.23506e-29	4.04047e-27	0.0495939	ENSG00000175166	PSMD2
19:3983857-3984135:-	Y	N	3.07188	1.31623e-29	4.29984e-27	0.0458888	ENSG00000167658	EEF2
3:136421164-136422409:-	Y	Y	4.24825	1.32436e-29	4.32016e-27	0.32336	ENSG00000118007	STAG1
8:52634969-52636014:-	Y	Y	4.81463	1.33891e-29	4.36138e-27	0.183535	ENSG00000023287	RB1CC1
1:211968708-211975165:-	Y	Y	2.67695	1.54012e-29	5.00962e-27	0.200509	ENSG00000143493	INTS7
10:119575792-119576610:-	Y	Y	3.60019	1.56465e-29	5.08212e-27	0.242234	ENSG00000151923	TIAL1
7:100095711-100095745:-	Y	Y	2.07218	1.62876e-29	5.2828e-27	0.152381	ENSG00000166508	MCM7
2:108783192-108783326:+	Y	N	4.61059	1.67213e-29	5.41572e-27	0.637281	ENSG00000153201	RANBP2
10:70167526-70170412:-	Y	Y	2.27262	1.86558e-29	6.02507e-27	0.0538819	ENSG00000079332	SAR1A
11:108192191-108193956:-	Y	Y	4.60562	1.86374e-29	6.02507e-27	0.354824	ENSG00000149308	NPAT
1:156126224-156126544:+	Y	Y	3.80762	2.03693e-29	6.56914e-27	0.184173	ENSG00000160789	LMNA
7:116904755-116906262:+	Y	Y	2.90996	2.06261e-29	6.64252e-27	0.0518887	ENSG00000198898	CAPZA2
4:56979005-56985259:+	Y	Y	2.59491	2.08685e-29	6.71107e-27	0.0411161	ENSG00000047315	POLR2B
14:89184155-89185536:-	Y	Y	4.03875	2.11331e-29	6.78654e-27	0.142016	ENSG00000053254	FOXN3
12:53471808-53474868:+	Y	Y	2.02463	2.16748e-29	6.95066e-27	0.0154074	ENSG00000197111	PCBP2
15:43765311-43765434:+	N	N	5.71231	2.21677e-29	7.09868e-27	0.280741	ENSG00000167004	PDIA3
1:184749593-184754488:-	Y	Y	3.69174	2.37429e-29	7.59242e-27	0.307565	ENSG00000116406	EDEM3
5:132886404-132887520:-	Y	Y	2.63554	2.39376e-29	7.6439e-27	0.201455	ENSG00000072364	AFF4
7:143300441-143303783:+	Y	N	2.93239	2.64319e-29	8.42855e-27	0.16108	ENSG00000106144	CASP2
4:109499847-109500054:+	N	N	5.6157	2.6851e-29	8.55017e-27	0.73245	ENSG00000138802	SEC24B
17:64503099-64503187:-	Y	N	4.10585	2.7755e-29	8.82568e-27	0.280762	ENSG00000108654	DDX5
1:179809447-179812109:+	Y	Y	-3.35619	2.78336e-29	8.83828e-27	-0.0696401	ENSG00000143340	FAM163A
4:7064342-7067439:-	Y	Y	3.4225	2.79843e-29	8.87371e-27	0.132869	ENSG00000109519	GRPEL1
2:61502311-61502608:-	Y	N	4.05631	3.05843e-29	9.68464e-27	0.250175	ENSG00000082898	XPO1
5:168795579-168806445:-	Y	Y	-3.08598	3.07838e-29	9.73425e-27	-0.0326818	ENSG00000184347	SLIT3
12:98595727-98595848:+	Y	N	-3.84551	3.1258e-29	9.87044e-27	-0.0532656	ENSG00000075415	SLC25A3
17:51056483-51079583:-	Y	Y	2.9797	3.26669e-29	1.0301e-26	0.0685808	ENSG00000008294	SPAG9
1:39026403-39028722:+	Y	Y	2.16203	3.36335e-29	1.05911e-26	0.0187937	ENSG00000168653	NDUFS5
7:2366449-2366524:+	Y	N	2.55514	3.65228e-29	1.1485e-26	0.33657	ENSG00000106263	EIF3B
17:81629876-81636396:-	Y	Y	2.07452	3.67045e-29	1.15262e-26	0.0183211	ENSG00000182446	NPLOC4
5:139364744-139365090:+	Y	N	2.59021	3.74291e-29	1.17375e-26	0.209332	ENSG00000120727	PAIP2
6:88614396-88677993:-	Y	Y	4.0198	3.76448e-29	1.17888e-26	0.13666	ENSG00000111880	RNGTT
8:65719496-65721797:-	Y	Y	3.1414	3.86153e-29	1.20761e-26	0.352368	ENSG00000205268	PDE7A
7:8223560-8227637:-	Y	Y	-3.53352	3.99646e-29	1.24809e-26	-0.0176129	ENSG00000003147	ICA1
17:27307993-27308207:+	Y	N	2.98123	4.0583e-29	1.26566e-26	0.39681	ENSG00000109046	WSB1
2:197402453-197402555:-	Y	Y	3.23394	4.20672e-29	1.31015e-26	0.291203	ENSG00000115524	SF3B1
5:134782087-134782944:+	Y	Y	4.15877	4.23003e-29	1.3156e-26	0.187766	ENSG00000145833	DDX46
1:25244106-25244176:-	Y	N	-3.71366	4.36142e-29	1.35461e-26	-0.514098	ENSG00000117616	RSRP1
7:100885371-100885587:+	Y	N	2.46344	4.42146e-29	1.37138e-26	0.218823	ENSG00000087087	SRRT
4:56467745-56469652:+	Y	Y	3.13641	4.46518e-29	1.38305e-26	0.053625	ENSG00000174780	SRP72
17:37259531-37263684:-	Y	Y	3.25491	4.65117e-29	1.4387e-26	0.0505565	ENSG00000278540	ACACA
2:47834872-47835871:-	Y	Y	3.48636	4.73784e-29	1.46351e-26	0.104683	ENSG00000138081	FBXO11
14:75148945-75149210:-	N	N	4.84073	4.9769e-29	1.53527e-26	0.173998	ENSG00000170348	TMED10
1:45605017-45606481:+	Y	Y	3.3139	5.30047e-29	1.63287e-26	0.0884236	ENSG00000132780	NASP
11:33092341-33096305:-	Y	Y	4.38657	5.50278e-29	1.69289e-26	0.197405	ENSG00000176102	CSTF3
1:77584909-77585043:-	Y	N	5.52324	5.63946e-29	1.73259e-26	0.555258	ENSG00000036549	ZZZ3
7:149251328-149252705:+	Y	Y	5.41111	5.84319e-29	1.79276e-26	0.707093	ENSG00000170260	ZNF212
17:39989930-39990093:+	Y	N	2.50027	5.89746e-29	1.80697e-26	0.198008	ENSG00000108344	PSMD3
8:48035062-48041746:+	Y	Y	3.54337	5.92647e-29	1.81341e-26	0.10941	ENSG00000169139	UBE2V2
18:49258494-49272177:-	Y	Y	3.0854	6.4869e-29	1.98222e-26	0.0544308	ENSG00000141627	DYM
8:119744394-119744880:-	Y	N	4.69577	6.52532e-29	1.99128e-26	0.574427	ENSG00000064313	TAF2
20:3604263-3615827:+	Y	Y	3.77008	6.61165e-29	2.01492e-26	0.122435	ENSG00000088812	ATRN
1:32386896-32393600:-	Y	Y	2.72351	7.10294e-29	2.16174e-26	0.0983767	ENSG00000160058	BSDC1
15:41005921-41016087:-	Y	Y	5.58646	7.43558e-29	2.25995e-26	0.591817	ENSG00000128908	INO80
12:45412660-45416698:+	Y	Y	3.26482	7.59643e-29	2.30575e-26	0.116595	ENSG00000177119	ANO6
X:111333154-111400989:-	Y	Y	-3.43639	8.34261e-29	2.52886e-26	-0.00713546	ENSG00000077279	DCX
7:5218015-5219031:+	Y	N	2.78242	9.20797e-29	2.78745e-26	0.111512	ENSG00000157954	WIPI2
7:139596999-139600416:-	Y	Y	3.7874	9.33957e-29	2.82352e-26	0.233048	ENSG00000064393	HIPK2
7:1496265-1497020:-	Y	Y	2.62273	9.41503e-29	2.84255e-26	0.0968621	ENSG00000164880	INTS1
X:153692231-153692792:+	Y	N	2.51906	9.98854e-29	3.0117e-26	0.290486	ENSG00000130821	SLC6A8
2:206144133-206144631:-	N	N	4.74219	1.00469e-28	3.02527e-26	0.201458	ENSG00000023228	NDUFS1
21:44084122-44084263:+	Y	N	-4.84886	1.07822e-28	3.24237e-26	-0.413106	ENSG00000160218	TRAPPC10
7:103298709-103299442:+	Y	Y	3.9895	1.11053e-28	3.33514e-26	0.200621	ENSG00000105819	PMPCB
7:77773447-77778337:+	Y	Y	3.05117	1.11464e-28	3.34305e-26	0.177606	ENSG00000187257	RSBN1L
3:179210566-179218208:+	Y	Y	3.8634	1.13995e-28	3.41445e-26	0.107439	ENSG00000121879	PIK3CA
11:61316570-61321254:-	Y	Y	2.41183	1.20353e-28	3.60013e-26	0.0139536	ENSG00000167986	DDB1
1:151424955-151425061:-	Y	N	-5.3404	1.28668e-28	3.84382e-26	-0.20878	ENSG00000143442	POGZ
17:41982008-41982245:-	Y	Y	4.28105	1.36606e-28	4.07557e-26	0.391895	ENSG00000168259	DNAJC7
15:43765435-43765449:+	Y	N	6.00699	1.41918e-28	4.22851e-26	0.179234	ENSG00000167004	PDIA3
20:487576-488677:-	Y	N	3.72352	1.42726e-28	4.24699e-26	0.179057	ENSG00000101266	CSNK2A1
3:39079809-39084154:+	Y	Y	3.08089	1.49993e-28	4.45741e-26	0.0522626	ENSG00000114742	WDR48
6:154810209-154815715:+	Y	Y	2.59435	1.6461e-28	4.88538e-26	0.0788263	ENSG00000213079	SCAF8
6:34417611-34417797:-	Y	N	3.30732	1.65824e-28	4.91349e-26	0.0861091	ENSG00000124614	RPS10
22:27898074-27910447:-	Y	Y	2.18482	1.6599e-28	4.91349e-26	0.0545255	ENSG00000180957	PITPNB
20:3615948-3624510:+	Y	Y	4.54733	1.6754e-28	4.95293e-26	0.29353	ENSG00000088812	ATRN
1:156251079-156251380:-	Y	N	3.33778	1.6816e-28	4.9648e-26	0.476394	ENSG00000198952	SMG5
19:18927244-18927743:+	N	N	3.50974	1.81581e-28	5.35407e-26	0.234765	ENSG00000105671	DDX49
9:83669328-83677726:-	Y	Y	2.34112	1.84167e-28	5.42328e-26	0.0537772	ENSG00000135018	UBQLN1
16:24758439-24758599:+	N	N	4.64992	1.85112e-28	5.44403e-26	0.656697	ENSG00000090905	TNRC6A
1:37576557-37581341:-	Y	Y	2.22331	1.88819e-28	5.54589e-26	0.0440535	ENSG00000134697	GNL2
14:21262993-21263310:-	Y	N	2.63072	1.89455e-28	5.55737e-26	0.23679	ENSG00000092199	HNRNPC
7:93889918-93890136:-	Y	N	2.77839	1.89791e-28	5.56004e-26	0.140985	ENSG00000105825	TFPI2
3:9443418-9444859:+	Y	N	3.59908	2.47174e-28	7.23179e-26	0.344838	ENSG00000168137	SETD5
1:1255488-1256044:-	Y	Y	3.17771	2.55821e-28	7.47515e-26	0.225863	ENSG00000160087	UBE2J2
13:72719098-72727523:-	Y	Y	3.6151	2.56386e-28	7.48202e-26	0.135204	ENSG00000204899	MZT1
2:161385572-161391103:+	Y	Y	4.1477	2.58945e-28	7.547e-26	0.114437	ENSG00000115233	PSMD14
10:26740645-26740817:+	Y	N	3.71472	2.63403e-28	7.66709e-26	0.542295	ENSG00000148459	PDSS1
13:45962176-45963841:-	Y	N	4.24461	2.72544e-28	7.923e-26	0.249427	ENSG00000123200	ZC3H13
19:49870061-49871546:-	Y	Y	1.93371	2.89458e-28	8.40394e-26	0.0689061	ENSG00000204673	AKT1S1
1:88784825-88786103:+	Y	Y	3.74146	3.05119e-28	8.84733e-26	0.316119	ENSG00000065243	PKN2
17:47674783-47675713:+	Y	Y	2.79088	3.12527e-28	9.05057e-26	0.0377602	ENSG00000108424	KPNB1
16:56683604-56683957:+	Y	N	6.53997	3.21453e-28	9.29719e-26	0.570026	ENSG00000187193	MT1X
X:154351042-154351139:-	Y	N	2.74192	3.65788e-28	1.0566e-25	0.33107	ENSG00000196924	FLNA
11:61965578-61966988:-	Y	Y	1.97931	3.95151e-28	1.13997e-25	0.00695747	ENSG00000167996	FTH1
11:68596219-68600340:+	Y	Y	2.69085	4.06302e-28	1.17065e-25	0.0836482	ENSG00000110075	PPP6R3
12:6748983-6749786:-	Y	Y	2.9275	4.27492e-28	1.23014e-25	0.0594842	ENSG00000089693	MLF2
16:70563642-70563728:+	N	N	4.84465	4.38077e-28	1.25901e-25	0.402066	ENSG00000189091	SF3B3
X:47240877-47241178:+	Y	N	2.45096	4.58749e-28	1.31675e-25	0.200479	ENSG00000102226	USP11
19:54129371-54131306:+	Y	Y	2.84816	4.71797e-28	1.35249e-25	0.0686968	ENSG00000105618	PRPF31
11:2379207-2382459:+	Y	Y	2.57486	4.76619e-28	1.36459e-25	0.0323415	ENSG00000110651	CD81
14:21262699-21262768:-	Y	N	2.74586	4.92565e-28	1.40847e-25	0.413555	ENSG00000092199	HNRNPC
8:102834666-102834747:-	Y	N	-7.33107	4.94949e-28	1.41351e-25	-0.0960013	ENSG00000155096	AZIN1
10:70161932-70162689:-	Y	Y	2.39589	5.23293e-28	1.49257e-25	0.0701613	ENSG00000079332	SAR1A
8:52630529-52634920:-	Y	Y	4.48093	5.37167e-28	1.53022e-25	0.36951	ENSG00000023287	RB1CC1
19:2762645-2763652:-	Y	Y	3.37045	5.5223e-28	1.57116e-25	0.128754	ENSG00000104969	SGTA
12:109469729-109471377:-	Y	N	3.22102	5.57134e-28	1.58313e-25	0.0394306	ENSG00000110906	KCTD10
5:138567649-138567722:-	Y	N	-5.86569	5.99274e-28	1.70075e-25	-0.0760018	ENSG00000113013	HSPA9
8:73293343-73293598:-	Y	Y	4.50274	6.36899e-28	1.80527e-25	0.449507	ENSG00000147604	RPL7
17:28674749-28674969:+	Y	N	5.2872	6.97977e-28	1.97593e-25	0.560172	ENSG00000109111	SUPT6H
1:226266333-226267956:-	Y	Y	4.1431	7.23373e-28	2.04527e-25	0.319055	ENSG00000183814	LIN9
17:41986592-41987594:-	Y	N	2.72212	7.45428e-28	2.10501e-25	0.163257	ENSG00000168259	DNAJC7
8:53970464-53978522:-	Y	Y	2.52906	8.11284e-28	2.28571e-25	0.0608932	ENSG00000187735	TCEA1
17:76401731-76402063:-	Y	N	3.53137	8.11431e-28	2.28571e-25	0.509708	ENSG00000175931	UBE2O
14:101836702-101856685:+	Y	Y	2.38523	8.23606e-28	2.31713e-25	0.0192302	ENSG00000078304	PPP2R5C
9:136465492-136465961:-	N	N	3.70086	8.42113e-28	2.36626e-25	0.413383	ENSG00000148396	SEC16A
8:47927354-47927770:-	Y	Y	3.37345	9.01702e-28	2.53057e-25	0.138746	ENSG00000253729	PRKDC
22:29282558-29286922:+	Y	Y	3.01249	9.60189e-28	2.69139e-25	0.0395464	ENSG00000182944	EWSR1
3:184328117-184328615:+	Y	N	2.93998	9.89911e-28	2.77127e-25	0.057709	ENSG00000114867	EIF4G1
16:3026782-3026866:+	Y	Y	3.66729	9.91156e-28	2.77134e-25	0.343107	ENSG00000131652	THOC6
16:3020760-3021159:+	Y	N	5.33599	1.03978e-27	2.90372e-25	0.571993	ENSG00000006327	TNFRSF12A
19:39836669-39837050:-	N	N	2.61897	1.04342e-27	2.9103e-25	0.0996613	ENSG00000105202	FBL
5:43292974-43293733:-	Y	Y	3.38869	1.05593e-27	2.94159e-25	0.188429	ENSG00000112972	HMGCS1
2:197488037-197488316:-	Y	Y	2.75253	1.08654e-27	3.02316e-25	0.0591039	ENSG00000144381	HSPD1
17:10686843-10691589:-	Y	Y	3.48669	1.1566e-27	3.21414e-25	0.157855	ENSG00000133028	SCO1
22:31425406-31426512:+	Y	Y	2.79896	1.19363e-27	3.31301e-25	0.113105	ENSG00000185721	DRG1
14:31107705-31109123:-	Y	Y	4.68953	1.2049e-27	3.34019e-25	0.247225	ENSG00000092148	HECTD1
1:8871577-8871890:-	Y	N	1.59664	1.24095e-27	3.43592e-25	0.0507233	ENSG00000074800	ENO1
7:100095665-100095710:-	N	N	2.20773	1.24532e-27	3.44382e-25	0.162011	ENSG00000166508	MCM7
4:55416158-55416922:+	Y	Y	3.13657	1.27742e-27	3.5283e-25	0.252097	ENSG00000134851	TMEM165
1:19141525-19141646:-	Y	Y	3.94249	1.30652e-27	3.6043e-25	0.450655	ENSG00000127481	UBR4
2:32758520-32766467:+	Y	Y	4.49492	1.35582e-27	3.73576e-25	0.227451	ENSG00000018699	TTC27
3:25606123-25607170:-	Y	N	3.14837	1.3759e-27	3.78649e-25	0.0869602	ENSG00000077097	TOP2B
7:73492922-73498496:-	Y	Y	2.37172	1.38702e-27	3.81249e-25	0.0737691	ENSG00000009954	BAZ1B
11:130140495-130141411:+	Y	N	3.77023	1.4235e-27	3.90802e-25	0.230072	ENSG00000084234	APLP2
17:1658382-1658525:-	Y	Y	4.09915	1.47438e-27	4.04282e-25	0.353152	ENSG00000174231	PRPF8
1:84658469-84662197:-	Y	Y	4.57052	1.51144e-27	4.13942e-25	0.19921	ENSG00000117155	SSX2IP
4:109816379-109817935:+	Y	Y	3.20536	1.55737e-27	4.26009e-25	0.0975599	ENSG00000109534	GAR1
X:53218399-53218563:-	Y	N	3.37487	1.57152e-27	4.29361e-25	0.250831	ENSG00000126012	KDM5C
11:47822168-47827074:-	Y	Y	3.1461	1.60484e-27	4.37937e-25	0.0475094	ENSG00000030066	NUP160
11:46649184-46650176:+	Y	Y	3.26185	1.64687e-27	4.48665e-25	0.120225	ENSG00000175224	ATG13
12:120153910-120154609:-	N	N	3.60346	1.6481e-27	4.48665e-25	0.371782	ENSG00000089154	GCN1
1:19160282-19160916:-	Y	Y	4.48064	1.65372e-27	4.49199e-25	0.443385	ENSG00000127481	UBR4
7:151484805-151490942:-	Y	Y	1.87379	1.65402e-27	4.49199e-25	0.0156541	ENSG00000106615	RHEB
17:68512580-68512881:+	Y	Y	2.92133	1.68229e-27	4.56331e-25	0.329934	ENSG00000108946	PRKAR1A
9:2831345-2833356:-	Y	Y	3.79774	1.69826e-27	4.60113e-25	0.383206	ENSG00000080608	PUM3
1:222564126-222568828:-	Y	Y	4.13	1.79935e-27	4.86922e-25	0.580725	ENSG00000143498	TAF1A
6:24654531-24657811:-	Y	Y	3.72407	1.87699e-27	5.07326e-25	0.219481	ENSG00000111802	TDP2
12:67277654-67281909:+	Y	Y	4.83745	1.88096e-27	5.07795e-25	0.108686	ENSG00000111530	CAND1
17:75059969-75060221:+	N	N	4.35243	1.90076e-27	5.12531e-25	0.566059	ENSG00000180901	KCTD2
16:87402282-87402609:+	Y	N	3.86944	1.95139e-27	5.25559e-25	0.176307	ENSG00000140941	MAP1LC3B
1:153813453-153816272:-	Y	Y	3.08699	2.07279e-27	5.56933e-25	0.275268	ENSG00000143614	GATAD2B
2:54974765-54982514:-	Y	Y	1.63147	2.07034e-27	5.56933e-25	0.0191689	ENSG00000115310	RTN4
17:64502730-64502899:-	Y	N	3.26498	2.1133e-27	5.67147e-25	0.315534	ENSG00000108654	DDX5
11:9433570-9433636:+	Y	N	-4.69327	2.11946e-27	5.68127e-25	-0.108802	ENSG00000205339	IPO7
8:102835476-102836255:-	Y	Y	3.10057	2.20794e-27	5.91147e-25	0.151757	ENSG00000155096	AZIN1
2:85539379-85539603:+	Y	Y	2.9795	2.30461e-27	6.16303e-25	0.415468	ENSG00000168906	MAT2A
2:53922585-53923048:-	Y	Y	4.08871	2.32933e-27	6.2218e-25	0.215539	ENSG00000068878	PSME4
16:2255727-2256866:-	Y	N	2.1953	2.34502e-27	6.25636e-25	0.0398129	ENSG00000205937	RNPS1
20:50096271-50096482:-	Y	Y	2.68527	2.35954e-27	6.28769e-25	0.179151	ENSG00000244687	UBE2V1
6:165336645-165339277:-	Y	Y	4.09298	2.44393e-27	6.50496e-25	0.309304	ENSG00000112541	PDE10A
17:60288683-60294682:-	Y	Y	3.07981	2.45236e-27	6.51974e-25	0.0824872	ENSG00000170832	USP32
17:46754558-46755313:+	N	N	4.70972	2.52819e-27	6.71348e-25	0.351255	ENSG00000073969	NSF
8:65721798-65723540:-	Y	N	3.15414	2.62215e-27	6.95484e-25	0.346045	ENSG00000205268	PDE7A
1:150625809-150626478:-	Y	Y	2.56509	2.71285e-27	7.18704e-25	0.189008	ENSG00000143420	ENSA
16:87393320-87398814:+	Y	Y	3.22293	2.73842e-27	7.24631e-25	0.0504374	ENSG00000140941	MAP1LC3B
3:100284050-100290577:+	Y	Y	4.14121	2.86805e-27	7.58051e-25	0.326011	ENSG00000036054	TBC1D23
8:27611967-27613577:-	Y	Y	5.03879	2.88258e-27	7.61005e-25	0.0795573	ENSG00000120885	CLU
X:154366225-154366307:-	Y	Y	2.50094	3.01683e-27	7.95521e-25	0.268158	ENSG00000196924	FLNA
3:101652939-101654703:-	Y	Y	3.85824	3.21899e-27	8.47845e-25	0.253201	ENSG00000066422	ZBTB11
1:1398672-1398956:-	Y	N	2.88141	3.31655e-27	8.72529e-25	0.205872	ENSG00000221978	CCNL2
2:61246478-61248510:-	Y	Y	4.03631	3.35365e-27	8.81267e-25	0.302702	ENSG00000115464	USP34
9:108984437-108990725:-	Y	Y	4.1074	3.37415e-27	8.85631e-25	0.107049	ENSG00000119326	CTNNAL1
10:97481043-97481348:-	N	N	4.81114	3.4149e-27	8.95291e-25	0.543232	ENSG00000155229	MMS19
5:168754008-168760861:-	Y	Y	-3.14991	3.49814e-27	9.16058e-25	-0.0335548	ENSG00000184347	SLIT3
10:68974744-68977528:+	Y	Y	2.7125	3.56466e-27	9.324e-25	0.0507055	ENSG00000165732	DDX21
2:175097594-175104037:-	Y	Y	3.50498	3.69307e-27	9.64878e-25	0.159877	ENSG00000115966	ATF2
10:70162818-70163031:-	Y	N	2.64432	3.70461e-27	9.66779e-25	0.122687	ENSG00000079332	SAR1A
12:108536786-108537105:-	Y	Y	3.76345	3.97038e-27	1.03495e-24	0.443453	ENSG00000075856	SART3
19:46376038-46376452:+	N	N	3.97076	4.24404e-27	1.10501e-24	0.0883954	ENSG00000011485	PPP5C
1:8870884-8870946:-	Y	N	2.34294	4.28275e-27	1.11381e-24	0.0996423	ENSG00000074800	ENO1
1:77964748-77964869:-	Y	Y	4.08625	4.4414e-27	1.15375e-24	0.195622	ENSG00000162613	FUBP1
13:32755957-32758086:+	Y	Y	4.14052	4.67597e-27	1.2133e-24	0.205133	ENSG00000083642	PDS5B
16:46618373-46620465:-	Y	Y	5.21644	4.68523e-27	1.21432e-24	0.635151	ENSG00000171241	SHCBP1
12:47664844-47666979:-	Y	Y	3.7269	4.69702e-27	1.21598e-24	0.160408	ENSG00000005175	RPAP3
20:21387007-21389272:+	Y	Y	4.18357	4.98255e-27	1.28843e-24	0.129464	ENSG00000088930	XRN2
1:156126736-156126915:+	Y	N	4.04321	5.51176e-27	1.42204e-24	0.20427	ENSG00000160789	LMNA
22:32479276-32483896:+	Y	Y	2.66313	5.51128e-27	1.42204e-24	0.061376	ENSG00000100225	FBXO7
19:8463853-8464749:+	Y	Y	2.77304	5.715e-27	1.4728e-24	0.108646	ENSG00000099783	HNRNPM
17:62600821-62601801:+	Y	Y	3.25167	5.94336e-27	1.52992e-24	0.162246	ENSG00000146872	TLK2
8:29046192-29046299:+	N	N	3.76787	5.96345e-27	1.53335e-24	0.571247	ENSG00000147421	HMBOX1
19:15413272-15417634:-	Y	Y	2.656	6.24897e-27	1.60495e-24	0.0842293	ENSG00000011243	AKAP8L
16:28825842-28825920:+	Y	N	3.66564	6.86748e-27	1.76181e-24	0.312962	ENSG00000168488	ATXN2L
1:36301085-36301552:+	Y	Y	3.39847	7.21633e-27	1.84921e-24	0.315871	ENSG00000054118	THRAP3
2:135858005-135859300:-	Y	Y	3.96481	7.44937e-27	1.90678e-24	0.0989474	ENSG00000076003	MCM6
8:123346751-123347091:-	Y	Y	4.18585	7.72647e-27	1.97548e-24	0.20139	ENSG00000156802	ATAD2
3:128482079-128483859:-	Y	Y	-3.13741	8.44109e-27	2.15576e-24	-0.0501242	ENSG00000179348	GATA2
17:47144092-47144255:-	N	N	4.43069	8.45309e-27	2.1564e-24	0.562345	ENSG00000004897	CDC27
2:235741049-235744697:+	Y	Y	3.26692	9.06124e-27	2.30895e-24	0.0714957	ENSG00000157985	AGAP1
19:34433413-34434867:+	Y	Y	2.47385	9.15888e-27	2.33121e-24	0.0641682	ENSG00000126261	UBA2
6:100510309-100512708:-	Y	Y	4.7367	9.21128e-27	2.34193e-24	0.312673	ENSG00000112249	ASCC3
1:43170944-43171121:-	Y	N	3.03636	9.22242e-27	2.34213e-24	0.153498	ENSG00000117395	EBNA1BP2
21:44777418-44779143:-	Y	Y	2.78792	9.34107e-27	2.36961e-24	0.082229	ENSG00000184787	UBE2G2
7:120964742-120964838:+	Y	N	-4.53904	9.45378e-27	2.39553e-24	-0.513453	ENSG00000071243	ING3
1:29149227-29150102:-	Y	Y	5.14221	9.69336e-27	2.4535e-24	0.651701	ENSG00000116350	SRSF4
2:27241397-27241910:+	Y	Y	4.02558	9.9103e-27	2.50562e-24	0.341652	ENSG00000084774	CAD
12:108544945-108545138:-	Y	Y	3.85904	9.97666e-27	2.51959e-24	0.556361	ENSG00000075856	SART3
7:82117174-82136634:-	Y	Y	2.20891	1.01246e-26	2.55412e-24	0.0448854	ENSG00000153956	CACNA2D1
3:52658343-52662132:-	Y	Y	3.94034	1.02454e-26	2.5817e-24	0.113251	ENSG00000163939	PBRM1
5:128152806-128157987:+	Y	Y	4.09833	1.03612e-26	2.60801e-24	0.157457	ENSG00000064651	SLC12A2
1:151400901-151401052:+	Y	N	1.85593	1.05388e-26	2.64977e-24	0.118006	ENSG00000159377	PSMB4
6:109377972-109379578:-	Y	Y	3.0596	1.06114e-26	2.66507e-24	0.102412	ENSG00000135535	CD164
7:2366592-2366743:+	Y	N	3.42735	1.07706e-26	2.70207e-24	0.347298	ENSG00000106263	EIF3B
9:35062139-35062155:-	Y	N	3.61469	1.16713e-26	2.92479e-24	0.165136	ENSG00000165280	VCP
7:54757595-54759037:-	Y	Y	1.81313	1.17239e-26	2.93474e-24	0.0218157	ENSG00000132432	SEC61G
7:99618787-99619047:+	N	N	4.64644	1.17777e-26	2.94495e-24	0.634071	ENSG00000197037	ZSCAN25
4:145121814-145122868:+	Y	N	3.07023	1.20132e-26	3.00053e-24	0.17975	ENSG00000164163	ABCE1
2:53906869-53907972:-	Y	Y	3.83663	1.21951e-26	3.04263e-24	0.130872	ENSG00000068878	PSME4
13:20062972-20064450:+	Y	Y	4.74564	1.29729e-26	3.23313e-24	0.397697	ENSG00000121741	ZMYM2
13:29524254-29530537:-	Y	Y	2.35805	1.34308e-26	3.34357e-24	0.0693879	ENSG00000139514	SLC7A1
12:46367411-46370511:-	Y	Y	1.87455	1.36404e-26	3.39205e-24	0.118033	ENSG00000134294	SLC38A2
1:182855577-182855713:+	Y	N	2.76593	1.41268e-26	3.50532e-24	0.387061	ENSG00000135829	DHX9
5:168817464-168823259:-	Y	Y	-3.608	1.41169e-26	3.50532e-24	-0.017967	ENSG00000184347	SLIT3
18:47841951-47844911:-	Y	Y	3.87161	1.42718e-26	3.53744e-24	0.253083	ENSG00000175387	SMAD2
2:149576543-149579430:-	Y	Y	3.3751	1.44692e-26	3.58245e-24	0.112302	ENSG00000168288	MMADHC
7:108472676-108479183:-	Y	Y	2.40178	1.45475e-26	3.5979e-24	0.0677243	ENSG00000135241	PNPLA8
1:11018374-11018453:+	Y	N	6.40559	1.48494e-26	3.66858e-24	0.627848	ENSG00000120948	TARDBP
4:57007003-57009558:+	Y	Y	2.33102	1.52071e-26	3.75287e-24	0.0543581	ENSG00000047315	POLR2B
7:112336172-112337727:+	Y	Y	4.18578	1.52946e-26	3.76627e-24	0.232369	ENSG00000198839	ZNF277
13:31153979-31154632:-	Y	N	2.11079	1.52847e-26	3.76627e-24	0.103682	ENSG00000120694	HSPH1
2:241269361-241269561:-	Y	N	2.92573	1.55306e-26	3.82025e-24	0.222259	ENSG00000115677	HDLBP
22:27894376-27894554:-	Y	N	4.22734	1.55948e-26	3.83187e-24	0.391011	ENSG00000180957	PITPNB
6:136269262-136269263:-	Y	N	5.69233	1.57466e-26	3.86499e-24	0.696584	ENSG00000029363	BCLAF1
3:180954106-180957526:+	Y	Y	2.03943	1.59036e-26	3.89931e-24	0.0918785	ENSG00000114416	FXR1
2:177433125-177434326:+	Y	Y	3.98759	1.65239e-26	4.04703e-24	0.187927	ENSG00000018510	AGPS
2:218239563-218245419:+	Y	Y	1.65249	1.65949e-26	4.06005e-24	0.0127678	ENSG00000163466	ARPC2
15:78542684-78543817:+	Y	Y	3.96805	1.69762e-26	4.14887e-24	0.224426	ENSG00000041357	PSMA4
1:26775817-26775956:+	Y	N	2.84869	1.75864e-26	4.29337e-24	0.338212	ENSG00000117713	ARID1A
9:133350320-133350383:+	Y	N	2.55162	1.77227e-26	4.322e-24	0.0853705	ENSG00000148303	RPL7A
1:160296150-160297342:-	Y	Y	3.84391	1.82177e-26	4.43794e-24	0.153025	ENSG00000122218	COPA
14:57280423-57282088:+	Y	Y	3.07529	1.83146e-26	4.45676e-24	0.188018	ENSG00000053770	AP5M1
17:7221683-7221936:+	Y	Y	2.49033	1.93011e-26	4.69179e-24	0.240356	ENSG00000072778	ACADVL
19:49685162-49685215:+	Y	N	2.72232	2.05278e-26	4.98464e-24	0.139725	ENSG00000126457	PRMT1
15:73254830-73258765:+	Y	Y	4.05923	2.11051e-26	5.11936e-24	0.123718	ENSG00000067141	NEO1
7:150960877-150974710:-	Y	Y	-3.4557	2.13365e-26	5.16997e-24	-0.0332881	ENSG00000055118	KCNH2
17:82091685-82092454:-	Y	Y	1.78971	2.15013e-26	5.20434e-24	0.0860998	ENSG00000169710	FASN
1:26775957-26778098:+	Y	Y	2.33002	2.17003e-26	5.24692e-24	0.091882	ENSG00000117713	ARID1A
10:32040458-32048463:-	Y	Y	1.92316	2.22095e-26	5.36432e-24	0.0186295	ENSG00000170759	KIF5B
17:59671138-59672947:+	Y	Y	2.548	2.29173e-26	5.5294e-24	0.0204219	ENSG00000141367	CLTC
1:201871328-201872827:+	Y	Y	2.52599	2.31076e-26	5.56939e-24	0.103551	ENSG00000198700	IPO9
X:129487138-129488936:-	Y	Y	5.14418	2.35517e-26	5.67042e-24	0.141003	ENSG00000102038	SMARCA1
1:35636433-35641341:-	Y	Y	2.61613	2.45748e-26	5.91048e-24	0.0202022	ENSG00000126067	PSMB2
5:179833387-179833437:+	N	N	4.70029	2.48926e-26	5.98058e-24	0.461577	ENSG00000161011	SQSTM1
8:17961145-17962033:+	Y	Y	3.70416	2.51807e-26	6.04341e-24	0.161224	ENSG00000078674	PCM1
X:154365802-154366023:-	Y	N	2.9456	2.53478e-26	6.07707e-24	0.321214	ENSG00000196924	FLNA
1:32779524-32780084:-	Y	N	3.20744	2.67578e-26	6.40835e-24	0.153045	ENSG00000134684	YARS1
1:112661206-112661252:+	N	N	5.75997	2.86474e-26	6.85368e-24	0.183402	ENSG00000116489	CAPZA1
19:49685556-49685639:+	Y	N	2.65617	2.96813e-26	7.09355e-24	0.116015	ENSG00000126457	PRMT1
6:159788869-159789302:-	Y	N	3.09567	2.97569e-26	7.10414e-24	0.127853	ENSG00000120438	TCP1
17:32360934-32360967:+	Y	N	-5.50392	3.00524e-26	7.16715e-24	-0.0813353	ENSG00000010244	ZNF207
1:243573049-243610505:-	Y	Y	2.0077	3.20436e-26	7.634e-24	0.0135259	ENSG00000117020	AKT3
3:47336758-47338822:+	Y	N	3.69361	3.24083e-26	7.7128e-24	0.278526	ENSG00000114648	KLHL18
20:492365-492717:-	Y	N	4.37349	3.32633e-26	7.908e-24	0.224982	ENSG00000101266	CSNK2A1
14:101994850-101994985:+	Y	Y	3.57934	3.33027e-26	7.90907e-24	0.460658	ENSG00000197102	DYNC1H1
2:53893800-53895006:-	Y	Y	3.4703	3.38952e-26	8.04138e-24	0.194185	ENSG00000068878	PSME4
9:108999257-109013301:-	Y	Y	3.95243	3.43679e-26	8.14501e-24	0.123909	ENSG00000119326	CTNNAL1
7:2373118-2374527:+	Y	N	3.48849	3.49078e-26	8.26434e-24	0.0779286	ENSG00000106263	EIF3B
6:31729683-31729796:-	Y	N	3.14536	3.56664e-26	8.43514e-24	0.469698	ENSG00000213722	DDAH2
13:28676050-28677644:+	Y	N	2.18669	3.58727e-26	8.4751e-24	0.00931601	ENSG00000132963	POMP
7:99007164-99007322:+	N	N	4.05857	3.66061e-26	8.63937e-24	0.483592	ENSG00000196367	TRRAP
14:73726973-73727133:-	Y	N	5.32249	3.68022e-26	8.67666e-24	0.719481	ENSG00000156030	MIDEAS
16:3743733-3744893:-	Y	Y	3.52805	3.72101e-26	8.7637e-24	0.156724	ENSG00000005339	CREBBP
4:41257738-41260638:+	Y	Y	1.95761	3.78921e-26	8.91509e-24	0.0195662	ENSG00000154277	UCHL1
19:14412359-14412550:-	Y	N	3.89845	3.84703e-26	9.04176e-24	0.286421	ENSG00000123136	DDX39A
3:48970714-48970841:+	Y	N	3.52655	3.88724e-26	9.12682e-24	0.467871	ENSG00000177479	ARIH2
2:224504325-224505748:-	Y	Y	3.26512	4.12056e-26	9.66462e-24	0.088422	ENSG00000036257	CUL3
2:161391179-161395077:+	Y	Y	2.57835	4.49923e-26	1.05419e-23	0.0357789	ENSG00000115233	PSMD14
8:67060546-67061291:-	Y	N	2.87984	4.51777e-26	1.05744e-23	0.225611	ENSG00000121022	COPS5
9:89358192-89358720:+	Y	Y	3.29131	4.8471e-26	1.13336e-23	0.186961	ENSG00000187742	SECISBP2
2:112742431-112742705:-	Y	N	4.9013	4.8585e-26	1.13485e-23	0.677719	ENSG00000169607	CKAP2L
5:141588251-141618797:-	Y	Y	3.25605	4.88712e-26	1.14037e-23	0.205461	ENSG00000131504	DIAPH1
3:143028647-143032783:+	Y	Y	3.80531	5.08997e-26	1.18648e-23	0.170699	ENSG00000163714	U2SURP
18:35340734-35342474:-	Y	Y	2.59175	5.21622e-26	1.21466e-23	0.095946	ENSG00000172466	ZNF24
X:77616731-77618805:-	Y	Y	3.67649	5.39008e-26	1.25386e-23	0.265852	ENSG00000085224	ATRX
12:53025227-53025345:+	Y	N	3.56851	5.54698e-26	1.28904e-23	0.325376	ENSG00000063046	EIF4B
17:21019186-21021112:-	Y	Y	2.31691	5.83094e-26	1.35364e-23	0.0489951	ENSG00000124422	USP22
7:87521120-87531293:-	Y	Y	3.10148	5.89196e-26	1.36641e-23	0.120615	ENSG00000085563	ABCB1
7:94661098-94663333:+	Y	Y	3.55261	5.90123e-26	1.36658e-23	0.0377007	ENSG00000242265	PEG10
X:77613261-77616244:-	Y	N	3.36931	5.90473e-26	1.36658e-23	0.14658	ENSG00000085224	ATRX
8:9009139-9011541:+	Y	Y	4.25641	5.96512e-26	1.37915e-23	0.32749	ENSG00000104626	ERI1
1:98738804-98760053:+	Y	Y	2.27977	6.07739e-26	1.40368e-23	0.025035	ENSG00000162627	SNX7
2:189441579-189448378:+	Y	Y	2.97962	6.272e-26	1.44716e-23	0.140303	ENSG00000115368	WDR75
6:44251885-44251998:+	Y	Y	2.29913	6.29275e-26	1.45047e-23	0.128017	ENSG00000096384	HSP90AB1
2:46543400-46543753:+	Y	N	2.68436	6.35924e-26	1.46431e-23	0.255129	ENSG00000119729	RHOQ
7:107918062-107919009:+	Y	Y	3.46347	6.48036e-26	1.49069e-23	0.162102	ENSG00000091140	DLD
18:49490261-49490453:-	Y	N	3.88493	6.5866e-26	1.51359e-23	0.473312	ENSG00000265681	RPL17
11:6478960-6479139:-	Y	Y	3.61956	6.71158e-26	1.54075e-23	0.41163	ENSG00000132254	ARFIP2
14:21393255-21393475:-	Y	Y	4.06259	6.73045e-26	1.54352e-23	0.421718	ENSG00000100888	CHD8
19:55680770-55685395:+	Y	Y	1.93993	6.79774e-26	1.55738e-23	0.0176882	ENSG00000063245	EPN1
5:115835162-115837627:-	Y	Y	2.95835	7.03129e-26	1.60927e-23	0.177604	ENSG00000145782	ATG12
1:236564662-236565918:-	Y	Y	2.55374	7.46884e-26	1.70769e-23	0.128136	ENSG00000119285	HEATR1
4:113323795-113330245:+	Y	Y	3.37547	7.9564e-26	1.81733e-23	0.075277	ENSG00000145362	ANK2
12:6750344-6750712:-	Y	N	2.45474	7.9861e-26	1.82228e-23	0.0555594	ENSG00000089693	MLF2
6:157140613-157141277:+	Y	N	3.69058	8.07849e-26	1.84152e-23	0.187201	ENSG00000049618	ARID1B
1:150267790-150267956:-	Y	Y	3.05374	8.65968e-26	1.97202e-23	0.187465	ENSG00000117362	APH1A
6:3227263-3227486:-	Y	N	2.43218	8.68694e-26	1.97624e-23	0.115203	ENSG00000137285	TUBB2B
7:116898836-116904176:+	Y	Y	2.29072	8.9038e-26	2.02355e-23	0.0281612	ENSG00000198898	CAPZA2
7:103297559-103297953:+	Y	N	4.16329	9.27398e-26	2.10557e-23	0.364976	ENSG00000105819	PMPCB
17:30461664-30461876:+	N	N	4.58804	9.30689e-26	2.11094e-23	0.414809	ENSG00000108582	CPD
7:149250808-149251209:+	Y	Y	5.99212	9.83745e-26	2.22905e-23	0.766004	ENSG00000170260	ZNF212
9:79705266-79705888:+	N	N	2.84476	1.01402e-25	2.29536e-23	0.229101	ENSG00000106829	TLE4
8:47915419-47918276:-	Y	Y	3.85536	1.03546e-25	2.34155e-23	0.0674982	ENSG00000253729	PRKDC
22:45744818-45793595:+	Y	Y	1.82529	1.0366e-25	2.3418e-23	0.0146622	ENSG00000130638	ATXN10
12:53452976-53453283:+	Y	N	2.16627	1.08572e-25	2.45032e-23	0.0728574	ENSG00000197111	PCBP2
7:2366744-2366998:+	Y	Y	3.84086	1.08834e-25	2.45379e-23	0.362026	ENSG00000106263	EIF3B
20:21348431-21348998:+	Y	Y	3.23742	1.10243e-25	2.4831e-23	0.278249	ENSG00000088930	XRN2
17:75851200-75851567:-	Y	N	2.92692	1.10642e-25	2.48961e-23	0.19111	ENSG00000132471	WBP2
7:35863659-35872665:+	Y	Y	2.15964	1.22698e-25	2.75817e-23	0.0296825	ENSG00000122545	SEPTIN7
17:51266281-51268836:+	Y	Y	3.31725	1.29161e-25	2.90057e-23	0.201093	ENSG00000011260	UTP18
10:77986160-77988203:-	Y	N	2.81409	1.32514e-25	2.97293e-23	0.129361	ENSG00000148606	POLR3A
6:31534512-31535366:-	Y	N	2.09278	1.33599e-25	2.99431e-23	0.341359	ENSG00000198563	DDX39B
7:99037188-99038387:-	Y	Y	3.84539	1.38814e-25	3.10814e-23	0.397521	ENSG00000198742	SMURF1
1:151400846-151400900:+	Y	N	1.82057	1.41775e-25	3.1713e-23	0.140894	ENSG00000159377	PSMB4
8:145053147-145053296:+	Y	Y	4.6236	1.53886e-25	3.43882e-23	0.285564	ENSG00000182307	C8orf33
14:45102697-45107450:+	Y	Y	4.6869	1.54465e-25	3.44837e-23	0.52241	ENSG00000185246	PRPF39
17:48911179-48912833:+	Y	N	3.28785	1.5549e-25	3.46784e-23	0.411558	ENSG00000159202	UBE2Z
14:94057898-94060097:-	Y	Y	2.72444	1.57057e-25	3.49936e-23	0.0747977	ENSG00000089737	DDX24
9:26916456-26916705:-	Y	N	3.03928	1.76162e-25	3.92118e-23	0.444426	ENSG00000137055	PLAA
5:140679128-140679787:-	Y	N	2.47671	1.78335e-25	3.96566e-23	0.0951211	ENSG00000170445	HARS1
14:22565138-22567087:-	Y	Y	2.28706	1.84765e-25	4.10463e-23	0.0182323	ENSG00000129562	DAD1
4:112638674-112644303:+	Y	Y	4.50045	2.06039e-25	4.57275e-23	0.551437	ENSG00000174720	LARP7
1:42265190-42278347:-	Y	Y	3.77381	2.07192e-25	4.59386e-23	0.155643	ENSG00000198815	FOXJ3
1:222719360-222722418:+	Y	Y	2.67736	2.08414e-25	4.61643e-23	0.093224	ENSG00000162819	BROX
19:15410595-15413183:-	Y	Y	3.00972	2.11963e-25	4.68591e-23	0.0840095	ENSG00000011243	AKAP8L
20:44501301-44503814:-	Y	Y	2.96461	2.11769e-25	4.68591e-23	0.280599	ENSG00000132824	SERINC3
16:30068991-30069261:+	Y	Y	2.70347	2.12952e-25	4.70319e-23	0.0257482	ENSG00000149925	ALDOA
1:8868058-8870171:-	Y	Y	1.19879	2.16094e-25	4.76794e-23	0.00721325	ENSG00000074800	ENO1
19:2244954-2245168:+	Y	N	2.92642	2.26338e-25	4.98914e-23	0.100221	ENSG00000104897	SF3A2
10:815716-817724:-	Y	Y	2.70282	2.30336e-25	5.07232e-23	0.104944	ENSG00000107929	LARP4B
3:50093043-50093717:+	Y	Y	3.82478	2.35694e-25	5.18529e-23	0.271725	ENSG00000003756	RBM5
3:45732152-45734594:+	Y	Y	3.48404	2.4781e-25	5.44657e-23	0.282153	ENSG00000211456	SACM1L
7:2355421-2360709:+	Y	Y	2.28526	2.48216e-25	5.45021e-23	0.0480514	ENSG00000106263	EIF3B
2:218265683-218265725:-	Y	N	2.83168	2.51011e-25	5.50625e-23	0.405685	ENSG00000127837	AAMP
17:31880755-31884423:-	Y	Y	4.30278	2.57452e-25	5.64211e-23	0.245076	ENSG00000108651	UTP6
4:41264191-41264465:+	Y	N	2.32414	2.58147e-25	5.65187e-23	0.054473	ENSG00000154277	UCHL1
14:52714033-52718080:+	Y	Y	2.2394	2.62228e-25	5.7357e-23	0.0498824	ENSG00000100519	PSMC6
9:135850462-135862466:-	Y	Y	2.98682	2.77087e-25	6.05486e-23	0.0645973	ENSG00000130559	CAMSAP1
20:35306450-35306665:-	Y	N	3.58445	2.77789e-25	6.06438e-23	0.486031	ENSG00000101019	UQCC1
1:245930824-245953230:-	Y	Y	3.54067	2.8516e-25	6.21931e-23	0.0303206	ENSG00000185420	SMYD3
1:30941922-30941997:-	Y	N	4.09243	2.90723e-25	6.32766e-23	0.583141	ENSG00000134644	PUM1
3:129269001-129271766:+	Y	Y	2.10813	2.90964e-25	6.32766e-23	0.0262278	ENSG00000181789	COPG1
15:90496714-90497231:+	Y	N	6.04763	2.90568e-25	6.32766e-23	0.300516	ENSG00000140575	IQGAP1
3:139351157-139352646:+	Y	N	3.72341	2.92762e-25	6.36066e-23	0.23109	ENSG00000175110	MRPS22
18:63365962-63366249:-	Y	N	4.29343	2.94813e-25	6.39911e-23	0.601242	ENSG00000119537	KDSR
2:216109458-216110466:+	Y	Y	1.68468	3.05854e-25	6.63243e-23	0.0417038	ENSG00000079246	XRCC5
5:138561111-138561579:-	Y	N	2.56854	3.07648e-25	6.66495e-23	0.0540257	ENSG00000113013	HSPA9
4:186723857-186726353:-	Y	Y	2.54424	3.18137e-25	6.88562e-23	0.0819137	ENSG00000083857	FAT1
8:109560930-109563396:+	Y	Y	3.9326	3.41748e-25	7.38961e-23	0.26357	ENSG00000147654	EBAG9
1:246660335-246665699:+	Y	Y	2.92573	3.46961e-25	7.49519e-23	0.169782	ENSG00000162852	CNST
12:895161-895196:+	N	N	5.93009	3.52124e-25	7.59948e-23	0.573659	ENSG00000060237	WNK1
1:171537474-171539970:+	Y	Y	3.03871	3.73651e-25	8.05641e-23	0.0649353	ENSG00000117523	PRRC2C
1:227749306-227758605:+	Y	Y	4.12977	3.91436e-25	8.43188e-23	0.160489	ENSG00000143740	SNAP47
9:125342107-125342218:+	N	N	4.02187	4.15406e-25	8.93973e-23	0.571546	ENSG00000165219	GAPVD1
9:128621667-128621998:+	Y	N	4.40032	4.35778e-25	9.36926e-23	0.510414	ENSG00000197694	SPTAN1
16:3743469-3743662:-	Y	Y	4.05339	4.41347e-25	9.47516e-23	0.309283	ENSG00000005339	CREBBP
X:48575815-48575898:+	Y	N	2.14378	4.41538e-25	9.47516e-23	0.273789	ENSG00000102317	RBM3
3:108565455-108565897:-	N	N	3.24592	4.43714e-25	9.51287e-23	0.453307	ENSG00000163507	CIP2A
2:229792227-229792972:-	Y	Y	3.63385	4.45625e-25	9.54482e-23	0.175592	ENSG00000153827	TRIP12
1:8870172-8870408:-	Y	N	2.70306	4.4871e-25	9.60185e-23	0.0212846	ENSG00000074800	ENO1
9:128909322-128912743:+	Y	Y	2.58842	4.52492e-25	9.67366e-23	0.0677494	ENSG00000136802	LRRC8A
14:77304801-77305744:-	Y	N	2.81173	4.61587e-25	9.85881e-23	0.214448	ENSG00000009830	POMT2
7:65964459-65967730:-	Y	Y	4.18022	4.79027e-25	1.02217e-22	0.323488	ENSG00000169919	GUSB
12:103936677-103937694:+	Y	N	2.94486	4.914e-25	1.04759e-22	0.0585095	ENSG00000166598	HSP90B1
14:74673219-74674033:-	Y	Y	4.33091	4.94345e-25	1.05288e-22	0.257425	ENSG00000119682	AREL1
11:20082601-20083006:+	Y	Y	3.72431	5.01258e-25	1.0666e-22	0.326534	ENSG00000166833	NAV2
3:14131675-14132545:+	Y	Y	2.80597	5.03285e-25	1.06991e-22	0.13444	ENSG00000170876	TMEM43
8:47826862-47827154:-	Y	Y	3.976	5.03798e-25	1.07e-22	0.287141	ENSG00000253729	PRKDC
20:41169629-41170111:+	N	N	2.98721	5.1803e-25	1.0992e-22	0.182916	ENSG00000124181	PLCG1
1:179847637-179850844:-	Y	Y	2.83011	5.18884e-25	1.09998e-22	0.203015	ENSG00000169905	TOR1AIP2
18:35342676-35343743:-	Y	Y	2.66285	5.26045e-25	1.11412e-22	0.100882	ENSG00000172466	ZNF24
1:156250997-156251078:-	Y	N	2.78192	5.39303e-25	1.14114e-22	0.43792	ENSG00000198952	SMG5
15:60394696-60395644:-	Y	Y	3.06456	5.95107e-25	1.25804e-22	0.0182476	ENSG00000182718	ANXA2
15:55195009-55195303:-	Y	Y	3.45004	6.26247e-25	1.32264e-22	0.189476	ENSG00000137876	RSL24D1
11:65857093-65857543:-	Y	N	4.49449	6.35611e-25	1.34117e-22	0.0992792	ENSG00000172757	CFL1
16:4609984-4610492:-	Y	N	3.24043	6.95268e-25	1.46569e-22	0.336082	ENSG00000153443	UBALD1
1:20503310-20507904:-	Y	Y	3.1638	6.99045e-25	1.47228e-22	0.180073	ENSG00000090432	MUL1
17:29498522-29502588:+	Y	Y	3.26134	7.03652e-25	1.48061e-22	0.129319	ENSG00000160551	TAOK1
12:103936617-103936676:+	Y	Y	3.24293	7.08013e-25	1.48841e-22	0.218536	ENSG00000166598	HSP90B1
16:56839070-56839216:+	Y	N	4.57793	7.10587e-25	1.49244e-22	0.341182	ENSG00000102900	NUP93
13:113200674-113208023:-	Y	Y	2.94627	7.20527e-25	1.51192e-22	0.154802	ENSG00000126226	PCID2
10:103434976-103437328:+	Y	Y	2.94636	7.34891e-25	1.54063e-22	0.111993	ENSG00000148843	PDCD11
1:7977739-7984863:+	Y	Y	2.18678	7.51094e-25	1.57315e-22	0.0115831	ENSG00000116288	PARK7
5:149507134-149509878:-	Y	Y	1.85665	7.57443e-25	1.58498e-22	0.0293454	ENSG00000113712	CSNK1A1
3:184166702-184166825:+	Y	Y	3.49586	7.62984e-25	1.59511e-22	0.310808	ENSG00000161202	DVL3
1:179110581-179110595:-	Y	N	6.65375	7.76549e-25	1.62197e-22	0.653069	ENSG00000143322	ABL2
17:76070445-76072307:-	Y	Y	3.32601	7.81594e-25	1.63101e-22	0.167867	ENSG00000167881	SRP68
20:62308368-62308470:+	Y	N	-3.15185	7.84483e-25	1.63554e-22	-0.188049	ENSG00000130706	ADRM1
14:67381691-67382410:+	Y	Y	3.06135	7.86375e-25	1.63798e-22	0.11896	ENSG00000134001	EIF2S1
5:141534489-141557746:-	Y	Y	2.76055	8.00361e-25	1.66558e-22	0.0214974	ENSG00000131504	DIAPH1
15:72229723-72230895:-	Y	Y	2.2979	8.73167e-25	1.81543e-22	0.00965922	ENSG00000067225	PKM
7:107174746-107179625:+	Y	Y	3.02986	8.88099e-25	1.84478e-22	0.0750636	ENSG00000105856	HBP1
1:77585044-77585059:-	Y	N	7.13064	9.34375e-25	1.93914e-22	0.604532	ENSG00000036549	ZZZ3
11:70422996-70425331:+	Y	Y	2.6096	9.78134e-25	2.0281e-22	0.0680166	ENSG00000085733	CTTN
1:1395185-1395393:-	Y	N	2.49176	1.05929e-24	2.19437e-22	0.257175	ENSG00000221978	CCNL2
4:3215212-3217764:+	Y	Y	3.47409	1.06723e-24	2.20879e-22	0.178786	ENSG00000197386	HTT
2:46543189-46543399:+	Y	Y	3.09096	1.07297e-24	2.21865e-22	0.287973	ENSG00000119729	RHOQ
17:42468108-42470089:+	Y	Y	3.30948	1.0901e-24	2.25203e-22	0.114327	ENSG00000033627	ATP6V0A1
9:70298222-70300045:+	Y	Y	5.24477	1.09583e-24	2.26181e-22	0.523518	ENSG00000198887	SMC5
11:65857034-65857092:-	Y	Y	4.71227	1.11001e-24	2.28899e-22	0.280436	ENSG00000172757	CFL1
2:218229304-218232999:+	Y	Y	2.38175	1.1182e-24	2.30379e-22	0.0321423	ENSG00000163466	ARPC2
7:100685147-100685343:-	Y	Y	2.78319	1.17301e-24	2.41451e-22	0.382987	ENSG00000146830	GIGYF1
2:65098067-65104733:-	Y	Y	2.1049	1.17931e-24	2.42385e-22	0.0216261	ENSG00000138069	RAB1A
6:163563720-163564666:+	Y	N	2.4279	1.17968e-24	2.42385e-22	0.167779	ENSG00000112531	QKI
17:63666651-63666939:+	N	N	4.64523	1.23998e-24	2.54545e-22	0.65366	ENSG00000198909	MAP3K3
17:80922828-80923489:+	Y	Y	3.69303	1.24212e-24	2.54754e-22	0.181607	ENSG00000141564	RPTOR
10:97481349-97481483:-	N	N	4.51248	1.27661e-24	2.6159e-22	0.590115	ENSG00000155229	MMS19
3:37244052-37244243:+	N	N	4.37078	1.313e-24	2.68806e-22	0.491466	ENSG00000144674	GOLGA4
15:78618916-78619278:-	Y	N	-1.98812	1.34758e-24	2.75637e-22	-0.139871	ENSG00000080644	CHRNA3
16:31188467-31189119:+	Y	N	1.86397	1.3584e-24	2.77598e-22	0.0422029	ENSG00000089280	FUS
4:146187552-146189621:+	Y	Y	3.45538	1.38145e-24	2.82056e-22	0.202681	ENSG00000164167	LSM6
11:47292597-47293882:+	Y	Y	4.30052	1.39741e-24	2.85058e-22	0.435286	ENSG00000110514	MADD
18:63331902-63334922:-	Y	Y	4.97351	1.41521e-24	2.8843e-22	0.27815	ENSG00000119537	KDSR
7:141741460-141741690:+	Y	N	3.20826	1.42281e-24	2.89719e-22	0.208967	ENSG00000106028	SSBP1
15:68146701-68153589:+	Y	Y	3.36538	1.43446e-24	2.91669e-22	0.118019	ENSG00000033800	PIAS1
17:28676431-28677714:+	Y	Y	4.48768	1.43496e-24	2.91669e-22	0.212369	ENSG00000109111	SUPT6H
7:5222813-5225822:+	Y	Y	1.88381	1.44769e-24	2.93994e-22	0.0637608	ENSG00000157954	WIPI2
8:67061423-67061629:-	Y	N	3.02076	1.45128e-24	2.94459e-22	0.33965	ENSG00000121022	COPS5
6:15468719-15487306:+	Y	Y	3.67566	1.48539e-24	3.01112e-22	0.154595	ENSG00000008083	JARID2
11:68054048-68061492:-	Y	Y	3.11044	1.52111e-24	3.08077e-22	0.136493	ENSG00000110721	CHKA
12:108543153-108544426:-	Y	Y	3.70828	1.53861e-24	3.11343e-22	0.460055	ENSG00000075856	SART3
20:48991199-48994450:+	Y	Y	4.67632	1.55409e-24	3.14195e-22	0.289147	ENSG00000124198	ARFGEF2
3:185612659-185613344:+	Y	Y	4.55552	1.60692e-24	3.24588e-22	0.297721	ENSG00000163904	SENP2
9:100320399-100321682:-	Y	Y	3.17829	1.65972e-24	3.34955e-22	0.195875	ENSG00000136891	TEX10
14:103521444-103521620:-	Y	N	2.07376	1.67127e-24	3.36987e-22	0.175215	ENSG00000166165	CKB
19:49873801-49875285:-	Y	N	2.27033	1.69906e-24	3.42286e-22	0.16102	ENSG00000204673	AKT1S1
1:184737737-184744634:-	Y	Y	3.05756	1.76031e-24	3.5431e-22	0.1388	ENSG00000116406	EDEM3
11:130070083-130070567:+	Y	Y	3.8492	1.81282e-24	3.64556e-22	0.156612	ENSG00000084234	APLP2
X:154351140-154351203:-	Y	N	2.78165	1.8287e-24	3.67424e-22	0.331458	ENSG00000196924	FLNA
12:112081135-112087682:-	Y	Y	4.41608	1.85432e-24	3.72243e-22	0.312149	ENSG00000111300	NAA25
9:125341752-125341864:+	Y	N	4.90248	1.88869e-24	3.78807e-22	0.639227	ENSG00000165219	GAPVD1
16:3026167-3026250:+	Y	N	2.83483	1.91313e-24	3.83371e-22	0.436727	ENSG00000131652	THOC6
17:59690827-59691251:+	N	N	2.74936	1.97443e-24	3.95307e-22	0.046593	ENSG00000141367	CLTC
19:34438767-34443843:+	Y	Y	2.09042	2.01166e-24	4.02199e-22	0.0274981	ENSG00000126261	UBA2
19:15413184-15413271:-	N	N	3.99277	2.0124e-24	4.02199e-22	0.430386	ENSG00000011243	AKAP8L
7:1493107-1493753:-	Y	Y	2.40628	2.03863e-24	4.07082e-22	0.0736069	ENSG00000164880	INTS1
2:175104038-175104147:-	N	N	5.67552	2.06186e-24	4.1136e-22	0.567067	ENSG00000115966	ATF2
16:57470409-57470974:+	Y	Y	2.82827	2.115e-24	4.2159e-22	0.186167	ENSG00000102978	POLR2C
6:136273963-136274189:-	Y	N	3.34683	2.1267e-24	4.23551e-22	0.327555	ENSG00000029363	BCLAF1
1:165668167-165668503:-	N	N	3.82727	2.18154e-24	4.34091e-22	0.240806	ENSG00000143149	ALDH9A1
2:61502609-61510622:-	Y	Y	2.75053	2.18413e-24	4.34228e-22	0.0789583	ENSG00000082898	XPO1
X:45106650-45106713:+	Y	N	8.02976	2.29275e-24	4.55423e-22	0.802765	ENSG00000147050	KDM6A
8:102271246-102272528:-	Y	Y	4.16859	2.29477e-24	4.55425e-22	0.244697	ENSG00000104517	UBR5
16:3026045-3026062:+	Y	N	3.45488	2.30022e-24	4.56108e-22	0.490236	ENSG00000131652	THOC6
10:89719707-89723575:+	Y	Y	4.16226	2.31174e-24	4.57992e-22	0.548944	ENSG00000138182	KIF20B
1:151401072-151401238:+	Y	N	1.41393	2.33694e-24	4.62582e-22	0.0926512	ENSG00000159377	PSMB4
6:43009758-43010467:+	Y	Y	4.22611	2.41298e-24	4.77217e-22	0.110045	ENSG00000112640	PPP2R5D
2:148942761-148946898:+	Y	Y	3.25971	2.42617e-24	4.79409e-22	0.0454298	ENSG00000168280	KIF5C
1:17410052-17412121:-	Y	Y	1.55558	2.47793e-24	4.8921e-22	0.0310392	ENSG00000179051	RCC2
18:9951354-9954052:+	Y	Y	2.71654	2.49612e-24	4.92373e-22	0.0457195	ENSG00000101558	VAPA
11:66264445-66265022:+	Y	Y	3.53001	2.56665e-24	5.05847e-22	0.173254	ENSG00000174996	KLC2
12:6861107-6861442:+	Y	Y	2.74087	2.68437e-24	5.28255e-22	0.113912	ENSG00000111667	USP5
X:53422041-53422173:-	Y	N	2.80152	2.68501e-24	5.28255e-22	0.285536	ENSG00000072501	SMC1A
6:33272132-33272586:+	Y	N	2.78123	2.72638e-24	5.3593e-22	0.026523	ENSG00000231500	RPS18
11:47422974-47424045:-	Y	Y	2.14396	2.74881e-24	5.39873e-22	0.0515513	ENSG00000165916	PSMC3
5:134686903-134688180:+	Y	Y	5.81778	2.79452e-24	5.48375e-22	0.569738	ENSG00000113615	SEC24A
14:51914275-51939780:+	Y	Y	-3.28462	2.81107e-24	5.51148e-22	-0.00555074	ENSG00000186469	GNG2
2:241326114-241335125:+	Y	Y	1.51528	2.82751e-24	5.53893e-22	0.0327155	ENSG00000168385	SEPTIN2
15:41092183-41095600:-	Y	Y	4.72694	2.90142e-24	5.67881e-22	0.504623	ENSG00000128908	INO80
12:103930801-103931520:+	Y	Y	2.78524	2.95901e-24	5.78654e-22	0.0824902	ENSG00000166598	HSP90B1
13:99537864-99539445:+	Y	Y	2.4789	2.97375e-24	5.81036e-22	0.040737	ENSG00000125304	TM9SF2
19:10678613-10678652:+	Y	N	-2.73842	3.0004e-24	5.85739e-22	-0.0877815	ENSG00000129351	ILF3
9:35707968-35708340:-	Y	Y	3.91286	3.02949e-24	5.9091e-22	0.305532	ENSG00000137076	TLN1
12:55726357-55726699:-	Y	Y	2.73302	3.20785e-24	6.25161e-22	0.0546737	ENSG00000135404	CD63
20:18532745-18535652:+	Y	Y	3.1861	3.3374e-24	6.49851e-22	0.116791	ENSG00000101310	SEC23B
3:130728685-130730307:-	Y	Y	4.29072	3.3569e-24	6.53088e-22	0.255377	ENSG00000196455	PIK3R4
5:77715318-77776204:-	Y	Y	3.30652	3.38669e-24	6.58319e-22	0.0919433	ENSG00000171530	TBCA
7:6128231-6135840:+	Y	Y	3.1746	3.39831e-24	6.60014e-22	0.12465	ENSG00000106346	USP42
1:8870947-8871576:-	Y	N	2.29465	3.4486e-24	6.69208e-22	0.0449677	ENSG00000074800	ENO1
5:72903784-72905302:+	Y	Y	2.09129	3.48974e-24	6.76614e-22	0.0251294	ENSG00000083312	TNPO1
12:120198756-120198770:-	Y	N	2.22232	3.55796e-24	6.89251e-22	0.0642361	ENSG00000089157	RPLP0
8:27606525-27608540:-	Y	Y	4.13185	3.70522e-24	7.17168e-22	0.173034	ENSG00000120885	CLU
X:124085401-124085669:+	Y	N	6.38488	4.12606e-24	7.97942e-22	0.593039	ENSG00000101972	STAG2
11:108929709-108940245:+	Y	Y	3.63306	4.15013e-24	8.01916e-22	0.134959	ENSG00000178105	DDX10
2:43890363-43892346:-	Y	N	3.62631	4.24493e-24	8.19535e-22	0.0642402	ENSG00000138095	LRPPRC
15:78540735-78540813:+	Y	N	2.65335	4.35503e-24	8.40076e-22	0.134255	ENSG00000041357	PSMA4
17:41986068-41986560:-	Y	Y	3.20783	4.40032e-24	8.48092e-22	0.111178	ENSG00000168259	DNAJC7
15:44717030-44717606:+	Y	N	2.94077	4.45341e-24	8.57596e-22	0.0949312	ENSG00000166710	B2M
6:136267176-136268161:-	Y	Y	3.31576	4.53411e-24	8.72397e-22	0.070343	ENSG00000029363	BCLAF1
8:18535959-18556208:-	Y	Y	4.92273	4.61947e-24	8.88069e-22	0.254983	ENSG00000156011	PSD3
13:113198265-113200426:-	Y	Y	3.39367	4.62877e-24	8.89104e-22	0.294743	ENSG00000126226	PCID2
4:75646457-75646662:-	Y	N	4.00008	4.63733e-24	8.89995e-22	0.26938	ENSG00000138757	G3BP2
22:29564372-29569192:-	Y	Y	-2.83719	4.64507e-24	8.90727e-22	-0.00860951	ENSG00000184117	NIPSNAP1
1:226364373-226365001:-	Y	N	3.27754	4.7356e-24	9.07321e-22	0.065262	ENSG00000143799	PARP1
3:186084281-186095119:-	Y	Y	3.14265	4.75792e-24	9.1083e-22	0.0941673	ENSG00000244405	ETV5
19:804209-804270:+	Y	N	3.03407	4.83391e-24	9.24596e-22	0.243818	ENSG00000011304	PTBP1
X:47198167-47198308:+	Y	N	2.2943	4.96298e-24	9.48485e-22	0.324025	ENSG00000130985	UBA1
11:47732183-47732219:-	Y	N	3.64114	4.9694e-24	9.48913e-22	0.45504	ENSG00000109920	FNBP4
10:996243-997207:+	Y	N	3.21967	5.19302e-24	9.90779e-22	0.256749	ENSG00000107937	GTPBP4
7:73540569-73542829:-	Y	Y	3.00774	5.20666e-24	9.92549e-22	0.096465	ENSG00000106635	BCL7B
5:151772669-151774604:+	Y	Y	2.90852	5.21648e-24	9.93585e-22	0.14575	ENSG00000145907	G3BP1
12:69598322-69598421:+	Y	N	-15.9616	5.44464e-24	1.03618e-21	-0.0333484	ENSG00000166226	CCT2
19:42294305-42294459:+	Y	Y	4.01866	5.5843e-24	1.06186e-21	0.383833	ENSG00000079432	CIC
19:18859383-18860320:+	Y	N	2.8722	5.59138e-24	1.06232e-21	0.229004	ENSG00000005007	UPF1
12:6859390-6859469:+	N	N	4.14703	5.6183e-24	1.06654e-21	0.3344	ENSG00000111667	USP5
16:55656969-55669564:+	Y	Y	-2.81467	5.62734e-24	1.06737e-21	-0.0245437	ENSG00000103546	SLC6A2
2:178447587-178450078:-	Y	Y	2.37024	5.74961e-24	1.08965e-21	0.0972292	ENSG00000180228	PRKRA
1:43970709-43970817:+	Y	N	2.22311	5.90482e-24	1.11813e-21	0.340812	ENSG00000132768	DPH2
17:1677272-1677564:-	Y	Y	2.1781	5.92291e-24	1.12062e-21	0.0767044	ENSG00000174231	PRPF8
14:103339334-103339638:+	Y	N	3.23385	5.96725e-24	1.12807e-21	0.116538	ENSG00000100664	EIF5
5:134777726-134777894:+	Y	N	3.89007	6.31272e-24	1.19239e-21	0.508517	ENSG00000145833	DDX46
16:3026289-3026351:+	Y	N	3.30028	6.44365e-24	1.2161e-21	0.507212	ENSG00000131652	THOC6
10:59804521-59805576:-	Y	N	3.49222	6.70104e-24	1.26363e-21	0.170867	ENSG00000108091	CCDC6
2:27434091-27434470:+	Y	Y	4.43559	6.83161e-24	1.28718e-21	0.246474	ENSG00000115216	NRBP1
10:68972053-68973544:+	Y	N	1.80972	7.05481e-24	1.32704e-21	0.0383178	ENSG00000165732	DDX21
15:90494836-90496713:+	Y	Y	5.34709	7.04907e-24	1.32704e-21	0.221048	ENSG00000140575	IQGAP1
17:50993938-50995056:-	Y	Y	4.39235	7.06984e-24	1.32876e-21	0.248758	ENSG00000008294	SPAG9
22:27894161-27894375:-	Y	N	4.67568	7.26248e-24	1.36384e-21	0.402132	ENSG00000180957	PITPNB
19:35723503-35723731:+	Y	N	3.62815	7.31422e-24	1.37242e-21	0.541259	ENSG00000272333	KMT2B
17:7845457-7845549:+	Y	Y	2.74551	7.34757e-24	1.37754e-21	0.416346	ENSG00000132510	KDM6B
5:134176686-134176719:-	Y	N	4.00488	7.45565e-24	1.39665e-21	0.336464	ENSG00000113558	SKP1
3:196403020-196407245:-	Y	Y	3.80774	7.71996e-24	1.44497e-21	0.230069	ENSG00000163960	UBXN7
12:68696927-68700725:+	Y	Y	2.47644	7.96701e-24	1.48998e-21	0.0422633	ENSG00000111581	NUP107
12:109101902-109101999:+	Y	N	-6.24574	8.2059e-24	1.5334e-21	-0.259506	ENSG00000076248	UNG
20:21357793-21365420:+	Y	Y	2.57055	8.80173e-24	1.64338e-21	0.0400738	ENSG00000088930	XRN2
4:41876981-41879394:-	Y	Y	-4.32112	8.99744e-24	1.67841e-21	-0.0170679	ENSG00000245870	LINC00682
19:38846091-38847315:-	Y	Y	2.04837	9.00414e-24	1.67841e-21	0.0272445	ENSG00000104824	HNRNPL
14:77287013-77287209:-	Y	N	3.76884	9.11732e-24	1.69812e-21	0.315729	ENSG00000009830	POMT2
4:108651497-108655563:+	Y	Y	2.73457	9.51595e-24	1.77091e-21	0.0750354	ENSG00000198856	OSTC
11:62799257-62800112:-	Y	N	2.29928	9.62218e-24	1.78921e-21	0.377146	ENSG00000162231	NXF1
18:46095148-46097835:-	Y	Y	3.26526	9.79059e-24	1.81904e-21	0.0905415	ENSG00000152234	ATP5F1A
3:81705614-81743556:-	Y	Y	3.29503	1.01997e-23	1.89351e-21	0.0299029	ENSG00000114480	GBE1
5:94689607-94691194:+	Y	Y	5.28819	1.05665e-23	1.95998e-21	0.555623	ENSG00000133302	SLF1
5:134174932-134175570:-	Y	N	3.77747	1.08461e-23	2.01021e-21	0.251981	ENSG00000113558	SKP1
22:41264844-41268096:-	Y	Y	2.55787	1.09877e-23	2.0348e-21	0.040345	ENSG00000100401	RANGAP1
8:55947724-55950458:+	Y	Y	2.36198	1.14017e-23	2.10974e-21	0.101875	ENSG00000254087	LYN
14:51952133-51966558:+	Y	Y	-3.13292	1.15229e-23	2.13043e-21	-0.00727293	ENSG00000186469	GNG2
7:30627380-30628543:+	Y	N	2.8008	1.18264e-23	2.18477e-21	0.10005	ENSG00000106105	GARS1
18:68684486-68687666:-	Y	Y	4.07442	1.18448e-23	2.18639e-21	0.497124	ENSG00000166479	TMX3
2:71370006-71379515:+	Y	Y	3.63146	1.23074e-23	2.26993e-21	0.500944	ENSG00000075292	ZNF638
12:100206259-100207662:+	Y	Y	3.7808	1.24332e-23	2.29127e-21	0.172619	ENSG00000075089	ACTR6
3:122452065-122453869:-	Y	Y	3.23187	1.2684e-23	2.33559e-21	0.175574	ENSG00000114030	KPNA1
10:34348116-34359146:-	Y	Y	3.05476	1.28779e-23	2.36937e-21	0.0947932	ENSG00000148498	PARD3
2:197423975-197434971:-	Y	Y	2.0382	1.29699e-23	2.38436e-21	0.00768689	ENSG00000115524	SF3B1
15:78540847-78540950:+	Y	N	2.85784	1.29857e-23	2.38534e-21	0.161235	ENSG00000041357	PSMA4
11:10808174-10808276:-	Y	N	2.61369	1.36469e-23	2.50477e-21	0.0641027	ENSG00000110321	EIF4G2
9:35740629-35740824:-	Y	Y	3.1447	1.40184e-23	2.57089e-21	0.392805	ENSG00000070610	GBA2
1:205729622-205749956:-	Y	Y	1.44107	1.43173e-23	2.62358e-21	0.0137168	ENSG00000069275	NUCKS1
10:125749814-125752798:+	Y	Y	4.11917	1.44704e-23	2.6495e-21	0.487254	ENSG00000107938	EDRF1
2:236046032-236049058:+	Y	Y	3.66236	1.45703e-23	2.66563e-21	0.119953	ENSG00000157985	AGAP1
17:48910881-48911178:+	Y	Y	3.33333	1.46274e-23	2.67394e-21	0.481241	ENSG00000159202	UBE2Z
19:4284905-4288191:+	Y	Y	-2.16596	1.47993e-23	2.70318e-21	-0.014448	ENSG00000105251	SHD
12:71769860-71770535:+	Y	Y	4.8963	1.53659e-23	2.80442e-21	0.484142	ENSG00000080371	RAB21
12:103932419-103932825:+	Y	Y	2.29808	1.55837e-23	2.84187e-21	0.0503475	ENSG00000166598	HSP90B1
17:10695562-10695740:-	Y	N	3.36375	1.60052e-23	2.91641e-21	0.341684	ENSG00000133028	SCO1
17:81888988-81888989:-	Y	N	5.15496	1.61351e-23	2.93772e-21	0.479412	ENSG00000183684	ALYREF
12:113844789-113858790:-	Y	Y	3.19709	1.67042e-23	3.0389e-21	0.0561693	ENSG00000122965	RBM19
20:58987818-58987969:+	Y	N	3.99282	1.80472e-23	3.28058e-21	0.239658	ENSG00000101158	NELFCD
8:119758143-119760454:-	Y	Y	4.0677	1.81314e-23	3.29325e-21	0.266465	ENSG00000064313	TAF2
3:14132936-14133738:+	Y	Y	2.96251	1.84776e-23	3.35345e-21	0.226494	ENSG00000170876	TMEM43
17:81690290-81690320:+	Y	N	3.76089	1.91408e-23	3.47104e-21	0.270594	ENSG00000185359	HGS
5:171392983-171400152:+	Y	Y	3.49096	1.94384e-23	3.5222e-21	0.0892294	ENSG00000181163	NPM1
14:69768897-69768928:+	Y	N	2.52711	1.95407e-23	3.53791e-21	0.389765	ENSG00000100650	SRSF5
11:62796568-62796941:-	Y	Y	2.89628	1.96347e-23	3.5521e-21	0.263896	ENSG00000162231	NXF1
16:58547683-58549718:-	Y	Y	2.74791	2.01789e-23	3.64764e-21	0.0768431	ENSG00000125107	CNOT1
1:154159049-154161641:-	Y	Y	2.28824	2.03381e-23	3.67057e-21	0.0175478	ENSG00000143549	TPM3
17:62011234-62029276:-	Y	Y	1.95849	2.03364e-23	3.67057e-21	0.0331554	ENSG00000108510	MED13
22:38494310-38494629:-	Y	N	2.99897	2.04246e-23	3.68326e-21	0.138788	ENSG00000100201	DDX17
17:76401155-76401730:-	Y	Y	3.24622	2.0691e-23	3.72833e-21	0.458681	ENSG00000175931	UBE2O
12:120769060-120770137:-	Y	N	3.513	2.16796e-23	3.90337e-21	0.161546	ENSG00000157837	SPPL3
6:35469286-35469314:+	Y	N	2.63188	2.19937e-23	3.9568e-21	0.162572	ENSG00000198755	RPL10A
16:1962973-1963106:-	Y	Y	1.53027	2.22294e-23	3.99603e-21	0.0113938	ENSG00000140988	RPS2
10:119070662-119070885:-	Y	Y	3.20756	2.29572e-23	4.12359e-21	0.17041	ENSG00000107581	EIF3A
1:176046325-176075262:-	Y	Y	2.46466	2.31177e-23	4.14915e-21	0.0653446	ENSG00000143207	COP1
14:69399466-69424093:+	Y	Y	2.18287	2.38119e-23	4.27035e-21	0.0124699	ENSG00000029364	SLC39A9
16:70544534-70548317:+	Y	Y	2.00491	2.40827e-23	4.31552e-21	0.0338704	ENSG00000189091	SF3B3
9:2833433-2834030:-	Y	Y	4.03983	2.49091e-23	4.46008e-21	0.460835	ENSG00000080608	PUM3
1:25244072-25244105:-	Y	N	-3.60665	2.50096e-23	4.47455e-21	-0.511702	ENSG00000117616	RSRP1
2:43960065-43960540:-	Y	N	2.76723	2.50802e-23	4.48366e-21	0.131591	ENSG00000138095	LRPPRC
2:53809593-53809729:+	Y	N	4.86262	2.56828e-23	4.58776e-21	0.340412	ENSG00000068912	ERLEC1
11:10803591-10803898:-	Y	N	2.22619	2.57514e-23	4.5964e-21	0.0597481	ENSG00000110321	EIF4G2
20:50095790-50096058:-	Y	N	2.5228	2.59471e-23	4.62769e-21	0.174991	ENSG00000244687	UBE2V1
10:77988204-77990900:-	Y	Y	2.73906	2.76415e-23	4.92603e-21	0.0904045	ENSG00000148606	POLR3A
6:159768629-159775169:+	Y	Y	2.29429	2.76795e-23	4.92893e-21	0.0226417	ENSG00000120437	ACAT2
6:52269227-52272300:-	Y	Y	2.37293	2.77122e-23	4.93088e-21	0.0329175	ENSG00000112118	MCM3
4:13580067-13581019:-	Y	Y	5.24775	2.77494e-23	4.93363e-21	0.738703	ENSG00000038219	BOD1L1
3:64013608-64017732:-	Y	N	1.89564	2.79579e-23	4.96682e-21	0.0312381	ENSG00000163636	PSMD6
8:119781194-119783380:-	Y	Y	4.39953	2.87503e-23	5.10359e-21	0.171215	ENSG00000064313	TAF2
7:100885588-100885700:+	Y	Y	2.29175	2.9187e-23	5.17707e-21	0.265875	ENSG00000087087	SRRT
15:40987194-40987815:-	Y	N	4.83031	2.925e-23	5.18419e-21	0.557721	ENSG00000128908	INO80
22:29511297-29511442:-	Y	N	3.53193	2.94497e-23	5.21551e-21	0.251705	ENSG00000100296	THOC5
1:35361790-35370028:+	Y	Y	2.43278	3.00541e-23	5.3184e-21	0.0630154	ENSG00000146463	ZMYM4
6:97186691-97228893:-	Y	Y	3.12698	3.07968e-23	5.44558e-21	0.161025	ENSG00000146263	MMS22L
16:30667939-30668559:+	Y	N	2.64075	3.10268e-23	5.48199e-21	0.138806	ENSG00000156860	FBRS
1:35184569-35184593:-	Y	N	-2.81881	3.18922e-23	5.63051e-21	-0.0745413	ENSG00000116560	SFPQ
3:45516277-45517902:+	Y	Y	3.49747	3.24638e-23	5.72697e-21	0.15013	ENSG00000011376	LARS2
4:2625396-2625431:+	Y	Y	7.92416	3.36164e-23	5.9257e-21	0.675175	ENSG00000125386	FAM193A
19:39381297-39383207:+	Y	Y	2.5936	3.37622e-23	5.94678e-21	0.0690278	ENSG00000179134	SAMD4B
3:58428180-58428351:-	Y	N	2.95318	3.46777e-23	6.1033e-21	0.193908	ENSG00000168291	PDHB
10:124412201-124414117:-	Y	Y	3.7276	3.49031e-23	6.13821e-21	0.0495584	ENSG00000065154	OAT
2:241250938-241250996:-	Y	N	3.14141	3.54557e-23	6.23057e-21	0.260175	ENSG00000115677	HDLBP
13:31152952-31153978:-	Y	Y	2.51271	3.62755e-23	6.3697e-21	0.0848265	ENSG00000120694	HSPH1
1:10415393-10416986:+	Y	Y	2.4479	3.75196e-23	6.58306e-21	0.0299247	ENSG00000142657	PGD
12:32722773-32731013:+	Y	Y	2.26252	3.83984e-23	6.72685e-21	0.0195175	ENSG00000087470	DNM1L
19:49911236-49911318:-	Y	N	3.16404	3.83965e-23	6.72685e-21	0.401096	ENSG00000213024	NUP62
2:43919918-43923366:-	Y	Y	2.55579	3.87384e-23	6.78119e-21	0.0281576	ENSG00000138095	LRPPRC
1:50197586-50200808:+	Y	Y	-3.23195	3.88767e-23	6.80016e-21	-0.052024	ENSG00000162374	ELAVL4
1:221711817-221736842:-	Y	Y	3.95023	3.92279e-23	6.8563e-21	0.320375	ENSG00000143507	DUSP10
8:20212906-20214817:+	Y	N	2.37135	3.93942e-23	6.88008e-21	0.130325	ENSG00000147416	ATP6V1B2
19:45689348-45690571:-	Y	Y	3.00761	3.98945e-23	6.96209e-21	0.0069768	ENSG00000125743	SNRPD2
17:69415001-69502153:+	Y	Y	-3.53999	4.08103e-23	7.11645e-21	-0.0191522	ENSG00000108984	MAP2K6
12:22668701-22671085:+	Y	Y	2.98738	4.09103e-23	7.1284e-21	0.151521	ENSG00000139163	ETNK1
1:221706467-221711636:-	Y	Y	4.05503	4.35311e-23	7.57925e-21	0.317036	ENSG00000143507	DUSP10
1:232491063-232493526:-	Y	Y	5.24714	4.38259e-23	7.62472e-21	0.304873	ENSG00000116991	SIPA1L2
1:212062950-212064916:+	Y	Y	2.52707	4.41129e-23	7.66879e-21	0.0873337	ENSG00000143476	DTL
6:35469315-35469340:+	Y	N	2.43629	4.55876e-23	7.9191e-21	0.187297	ENSG00000198755	RPL10A
11:68556910-68557024:+	N	N	4.16868	4.56595e-23	7.92551e-21	0.461517	ENSG00000110075	PPP6R3
11:130140484-130140494:+	Y	Y	3.63718	4.58141e-23	7.94628e-21	0.393722	ENSG00000084234	APLP2
1:151400188-151400441:+	Y	N	2.12009	4.5924e-23	7.95744e-21	0.0464636	ENSG00000159377	PSMB4
16:70561785-70563641:+	Y	Y	3.49693	4.59486e-23	7.95744e-21	0.137964	ENSG00000189091	SF3B3
16:3021160-3021188:+	Y	N	5.78195	4.61193e-23	7.98093e-21	0.737558	ENSG00000006327	TNFRSF12A
3:180951469-180953761:+	Y	Y	2.17477	4.66891e-23	8.07338e-21	0.0431815	ENSG00000114416	FXR1
6:34417898-34418368:-	Y	N	3.12531	4.7701e-23	8.24207e-21	0.0681911	ENSG00000124614	RPS10
4:75646663-75646911:-	Y	N	3.78064	4.85034e-23	8.37435e-21	0.261012	ENSG00000138757	G3BP2
5:37001079-37002661:+	Y	Y	5.61313	4.91278e-23	8.47412e-21	0.643244	ENSG00000164190	NIPBL
6:33272123-33272131:+	Y	Y	2.89507	4.9156e-23	8.47412e-21	0.0479581	ENSG00000231500	RPS18
3:123931527-123933524:-	Y	Y	-3.19188	4.95333e-23	8.5327e-21	-0.0430814	ENSG00000175455	CCDC14
19:1091501-1091791:-	Y	N	3.20139	4.96517e-23	8.54661e-21	0.0633001	ENSG00000099817	POLR2E
12:108526554-108530141:-	Y	Y	3.12145	4.97413e-23	8.55554e-21	0.199683	ENSG00000075856	SART3
11:76352795-76355559:-	Y	Y	3.98994	4.98785e-23	8.57264e-21	0.288838	ENSG00000137492	THAP12
X:53568875-53569615:-	Y	Y	4.57516	5.0209e-23	8.62292e-21	0.253293	ENSG00000086758	HUWE1
19:43733111-43733323:-	Y	Y	3.53844	5.13555e-23	8.81316e-21	0.3091	ENSG00000105771	SMG9
2:61500569-61501995:-	Y	Y	2.60835	5.1578e-23	8.84465e-21	0.0633393	ENSG00000082898	XPO1
2:20283487-20289575:-	Y	Y	2.86387	5.43381e-23	9.31093e-21	0.181933	ENSG00000055917	PUM2
7:128352679-128358680:-	Y	Y	-2.20228	5.68731e-23	9.73796e-21	-0.0319023	ENSG00000224940	PRRT4
2:28935741-28936921:+	Y	Y	2.75527	5.74752e-23	9.83362e-21	0.240096	ENSG00000163811	WDR43
3:169985190-169985804:+	Y	Y	3.04421	5.8208e-23	9.9515e-21	0.213427	ENSG00000008952	SEC62
3:12576742-12581366:+	Y	Y	2.98234	5.86515e-23	1.00198e-20	0.183656	ENSG00000075975	MKRN2
1:154977299-154977986:+	Y	N	2.78315	6.03359e-23	1.02998e-20	0.152296	ENSG00000173207	CKS1B
10:70163032-70166275:-	Y	Y	2.7029	6.07614e-23	1.03646e-20	0.0715602	ENSG00000079332	SAR1A
10:69369625-69376933:+	Y	Y	2.91964	6.39968e-23	1.09083e-20	0.0222084	ENSG00000156515	HK1
1:15920984-15922248:+	Y	Y	3.97287	6.74764e-23	1.14842e-20	0.335714	ENSG00000065526	SPEN
1:35182936-35184568:-	Y	N	-2.66483	6.74526e-23	1.14842e-20	-0.218636	ENSG00000116560	SFPQ
20:2664006-2664152:-	Y	Y	4.13497	6.76787e-23	1.151e-20	0.243627	ENSG00000101365	IDH3B
8:94490173-94491577:-	Y	Y	3.58655	6.80434e-23	1.15634e-20	0.173201	ENSG00000164944	VIRMA
16:89923459-89929092:+	Y	Y	1.82912	7.1749e-23	1.2184e-20	0.0182954	ENSG00000258947	TUBB3
18:56616315-56618003:-	Y	Y	2.64501	7.25709e-23	1.23143e-20	0.0579543	ENSG00000091164	TXNL1
11:62800113-62800376:-	Y	N	2.38089	7.54526e-23	1.27938e-20	0.387886	ENSG00000162231	NXF1
15:44557752-44560248:+	Y	Y	3.45735	7.55549e-23	1.28015e-20	0.206408	ENSG00000104131	EIF3J
1:64846737-64846909:-	Y	N	3.85767	7.85162e-23	1.32934e-20	0.24985	ENSG00000162434	JAK1
9:135817788-135817847:-	Y	N	5.35557	7.88827e-23	1.33455e-20	0.677009	ENSG00000130559	CAMSAP1
1:162592783-162597240:+	Y	Y	2.42582	8.00127e-23	1.35266e-20	0.036087	ENSG00000117143	UAP1
17:47123896-47123960:-	Y	N	-7.35718	8.01107e-23	1.3533e-20	-0.156578	ENSG00000004897	CDC27
6:31534486-31534511:-	Y	N	1.92307	8.02021e-23	1.35384e-20	0.281824	ENSG00000198563	DDX39B
6:159788275-159788436:-	Y	N	2.82791	8.24287e-23	1.39039e-20	0.178887	ENSG00000120438	TCP1
20:50096535-50096671:-	Y	N	2.58321	8.47177e-23	1.42794e-20	0.20921	ENSG00000244687	UBE2V1
6:159788144-159788274:-	Y	N	2.06485	8.48675e-23	1.42941e-20	0.16246	ENSG00000120438	TCP1
5:179619228-179619268:-	Y	N	2.16014	8.60056e-23	1.4475e-20	0.340773	ENSG00000169045	HNRNPH1
X:154399942-154400223:+	Y	N	1.28217	8.93934e-23	1.50341e-20	0.0329498	ENSG00000147403	RPL10
5:55340185-55341680:+	Y	Y	3.06613	8.95946e-23	1.50567e-20	0.0525462	ENSG00000039123	MTREX
7:34942640-34945666:-	Y	Y	3.60994	9.04924e-23	1.51964e-20	0.165872	ENSG00000173852	DPY19L1
X:45106714-45107409:+	Y	N	6.9408	9.19884e-23	1.54362e-20	0.835918	ENSG00000147050	KDM6A
17:48913022-48915719:+	Y	Y	2.64331	9.38306e-23	1.57337e-20	0.189996	ENSG00000159202	UBE2Z
17:2336037-2336076:-	Y	N	-3.26563	9.44352e-23	1.58234e-20	-0.234882	ENSG00000167721	TSR1
8:100261756-100264033:-	Y	Y	3.22939	9.56975e-23	1.6023e-20	0.290017	ENSG00000034677	RNF19A
21:43797696-43797906:+	Y	Y	4.71521	9.66395e-23	1.61688e-20	0.51033	ENSG00000160214	RRP1
12:113958051-113959211:-	Y	Y	4.28323	9.67365e-23	1.61732e-20	0.322233	ENSG00000122965	RBM19
3:125457366-125460770:-	Y	Y	3.72528	9.7783e-23	1.63361e-20	0.0938225	ENSG00000114520	SNX4
2:179950927-179952470:-	Y	Y	3.20358	9.79087e-23	1.63451e-20	0.0928251	ENSG00000163510	CWC22
13:32688881-32689021:+	Y	N	5.24824	9.85097e-23	1.64333e-20	0.666125	ENSG00000083642	PDS5B
17:75703860-75704713:+	Y	Y	2.60512	1.00962e-22	1.68301e-20	0.262162	ENSG00000161526	SAP30BP
6:15507417-15508339:+	Y	Y	4.56376	1.02934e-22	1.71462e-20	0.398899	ENSG00000008083	JARID2
10:49922670-49932099:-	Y	Y	2.92659	1.04249e-22	1.73525e-20	0.0630194	ENSG00000227345	PARG
6:31531745-31532412:-	Y	Y	2.81953	1.04898e-22	1.7436e-20	0.288071	ENSG00000198563	DDX39B
22:41169617-41170405:+	Y	Y	4.9721	1.04905e-22	1.7436e-20	0.60701	ENSG00000100393	EP300
11:77616696-77618532:-	Y	Y	2.242	1.07854e-22	1.79132e-20	0.177864	ENSG00000074201	CLNS1A
10:59805577-59806443:-	Y	Y	4.14877	1.11679e-22	1.85349e-20	0.159424	ENSG00000108091	CCDC6
7:143300380-143300440:+	Y	N	2.88214	1.14525e-22	1.89933e-20	0.443299	ENSG00000106144	CASP2
9:4827338-4833153:+	Y	Y	3.77761	1.14619e-22	1.8995e-20	0.2121	ENSG00000120158	RCL1
21:32748699-32750916:-	Y	Y	2.9104	1.15176e-22	1.90734e-20	0.216037	ENSG00000159086	PAXBP1
15:44716940-44717029:+	Y	N	5.1401	1.16474e-22	1.92707e-20	0.229217	ENSG00000166710	B2M
19:34454557-34458713:+	Y	Y	2.77393	1.16561e-22	1.92707e-20	0.0582491	ENSG00000126261	UBA2
21:42850243-42852254:-	Y	Y	3.41637	1.16622e-22	1.92707e-20	0.197816	ENSG00000160193	WDR4
17:58955768-58965693:+	Y	Y	3.6645	1.17177e-22	1.93483e-20	0.104131	ENSG00000175175	PPM1E
1:163147504-163152472:-	Y	Y	-0.876578	1.22198e-22	2.01628e-20	-0.00248638	ENSG00000143248	RGS5
2:190670460-190673100:+	Y	Y	3.52563	1.26365e-22	2.08352e-20	0.160097	ENSG00000138386	NAB1
6:111344044-111348952:-	Y	Y	4.31369	1.27966e-22	2.10838e-20	0.478966	ENSG00000009413	REV3L
2:86137141-86137468:+	Y	Y	4.06426	1.28329e-22	2.10977e-20	0.525157	ENSG00000132300	PTCD3
2:96352021-96353305:+	Y	Y	3.32477	1.2817e-22	2.10977e-20	0.184611	ENSG00000121152	NCAPH
10:96533191-96543600:-	Y	Y	2.26582	1.28298e-22	2.10977e-20	0.0340518	ENSG00000077147	TM9SF3
6:31625754-31625791:+	Y	N	2.37663	1.31495e-22	2.16026e-20	0.134206	ENSG00000204469	PRRC2A
11:57302826-57303479:-	Y	N	4.79351	1.3362e-22	2.19357e-20	0.595584	ENSG00000149115	TNKS1BP1
3:196372043-196391812:-	Y	Y	2.97262	1.33889e-22	2.1964e-20	0.077179	ENSG00000163960	UBXN7
X:53218564-53218712:-	Y	N	4.18361	1.36761e-22	2.2419e-20	0.248745	ENSG00000126012	KDM5C
17:81036962-81053361:+	Y	Y	3.50188	1.40211e-22	2.2968e-20	0.0726689	ENSG00000175866	BAIAP2
16:66610061-66610849:+	Y	Y	2.83361	1.45734e-22	2.38555e-20	0.202635	ENSG00000140931	CMTM3
10:94357332-94358082:-	Y	N	3.65878	1.46524e-22	2.39676e-20	0.466477	ENSG00000173145	NOC3L
11:10805016-10805906:-	Y	Y	1.5761	1.47646e-22	2.41337e-20	0.0319108	ENSG00000110321	EIF4G2
10:102353655-102354369:+	Y	N	4.05864	1.51246e-22	2.47044e-20	0.329509	ENSG00000107862	GBF1
2:224503823-224504324:-	Y	N	2.92643	1.53228e-22	2.50101e-20	0.126624	ENSG00000036257	CUL3
11:116871560-116871669:-	N	N	4.05067	1.56686e-22	2.55562e-20	0.44716	ENSG00000160584	SIK3
1:153990921-153991034:+	Y	N	2.19132	1.60804e-22	2.6209e-20	0.060201	ENSG00000177954	RPS27
3:28338618-28340401:-	Y	Y	2.75799	1.61063e-22	2.62323e-20	0.123111	ENSG00000163512	AZI2
2:9521596-9521744:-	Y	N	4.22097	1.63716e-22	2.66453e-20	0.556668	ENSG00000151694	ADAM17
1:77584767-77584829:-	Y	N	5.04779	1.67204e-22	2.71936e-20	0.630448	ENSG00000036549	ZZZ3
14:45118126-45120886:-	Y	Y	2.62079	1.69597e-22	2.7563e-20	0.056264	ENSG00000100442	FKBP3
1:184746750-184749546:-	Y	Y	3.08646	1.71504e-22	2.78529e-20	0.151211	ENSG00000116406	EDEM3
18:35342475-35342675:-	Y	N	3.10629	1.73587e-22	2.81711e-20	0.209049	ENSG00000172466	ZNF24
16:67197647-67197866:+	Y	Y	2.87973	1.75659e-22	2.8487e-20	0.320962	ENSG00000205250	E2F4
10:103396075-103396408:-	Y	Y	1.74523	1.76295e-22	2.85697e-20	0.0183556	ENSG00000173915	ATP5MK
19:5654457-5657240:+	Y	Y	3.08943	1.76485e-22	2.85801e-20	0.0782963	ENSG00000160633	SAFB
12:25225774-25227233:-	Y	Y	4.27893	1.77699e-22	2.87562e-20	0.332141	ENSG00000133703	KRAS
17:68524959-68525753:+	Y	N	2.90139	1.78398e-22	2.88488e-20	0.122273	ENSG00000108946	PRKAR1A
4:5843162-5843956:-	N	N	3.0406	1.78797e-22	2.88926e-20	0.0317822	ENSG00000072832	CRMP1
15:78543818-78544189:+	Y	N	3.668	1.85688e-22	2.99849e-20	0.209907	ENSG00000041357	PSMA4
15:52564247-52568288:-	Y	Y	2.36061	1.87447e-22	3.02474e-20	0.0503134	ENSG00000128989	ARPP19
12:120198800-120198853:-	Y	N	2.29577	1.87641e-22	3.02572e-20	0.0647426	ENSG00000089157	RPLP0
1:245956103-245988393:-	Y	Y	3.11744	1.88029e-22	3.02984e-20	0.0371841	ENSG00000185420	SMYD3
1:184744635-184746749:-	Y	N	3.15592	1.90897e-22	3.07386e-20	0.184719	ENSG00000116406	EDEM3
19:5696372-5696669:-	Y	N	3.04198	1.91112e-22	3.07514e-20	0.303353	ENSG00000196365	LONP1
14:77305861-77306245:-	Y	N	2.91489	1.92756e-22	3.09941e-20	0.335114	ENSG00000009830	POMT2
14:77287825-77288761:-	Y	Y	3.6386	1.92975e-22	3.10072e-20	0.132749	ENSG00000009830	POMT2
1:153818172-153818790:-	Y	Y	4.4839	1.98665e-22	3.18989e-20	0.194674	ENSG00000143614	GATAD2B
6:35469341-35469380:+	Y	N	1.9732	1.98894e-22	3.19131e-20	0.207107	ENSG00000198755	RPL10A
21:28944597-28945806:-	Y	Y	4.12908	2.00169e-22	3.2095e-20	0.264559	ENSG00000198862	LTN1
10:75230411-75230450:+	N	N	4.58668	2.01487e-22	3.22835e-20	0.254954	ENSG00000165637	VDAC2
14:102012471-102012867:+	Y	N	2.73405	2.01943e-22	3.23338e-20	0.0684728	ENSG00000197102	DYNC1H1
2:241249981-241250166:-	Y	N	2.92013	2.02781e-22	3.2432e-20	0.185937	ENSG00000115677	HDLBP
15:34964454-34969538:-	Y	Y	3.04629	2.02842e-22	3.2432e-20	0.143572	ENSG00000021776	AQR
7:103086938-103092476:+	Y	Y	2.25666	2.0608e-22	3.29265e-20	0.0802135	ENSG00000170632	ARMC10
13:77052701-77053918:-	Y	Y	4.4993	2.08588e-22	3.33038e-20	0.292648	ENSG00000005810	MYCBP2
1:24646790-24647078:+	Y	N	2.99175	2.11621e-22	3.37643e-20	0.310348	ENSG00000133226	SRRM1
3:131471335-131487149:-	Y	Y	1.93327	2.22174e-22	3.54232e-20	0.0235035	ENSG00000114686	MRPL3
19:55659346-55660176:+	Y	Y	2.16415	2.29355e-22	3.65425e-20	0.0382387	ENSG00000063244	U2AF2
6:160033108-160034418:+	Y	Y	3.29158	2.31302e-22	3.68268e-20	0.253247	ENSG00000197081	IGF2R
9:106939108-106972004:+	Y	Y	-2.63694	2.33185e-22	3.71006e-20	-0.0169463	ENSG00000148143	ZNF462
6:106202430-106217463:-	Y	Y	4.47035	2.38949e-22	3.7991e-20	0.195122	ENSG00000057663	ATG5
1:28536093-28536261:+	Y	N	3.46081	2.44119e-22	3.87859e-20	0.216557	ENSG00000180198	RCC1
7:127694949-127698874:+	Y	Y	2.20029	2.48649e-22	3.94781e-20	0.0173539	ENSG00000197157	SND1
17:47675912-47676076:+	Y	N	2.85301	2.54521e-22	4.03821e-20	0.0799945	ENSG00000108424	KPNB1
16:3026588-3026678:+	Y	Y	3.07919	2.58557e-22	4.09937e-20	0.406934	ENSG00000131652	THOC6
3:45734595-45735234:+	Y	N	3.38665	2.60866e-22	4.1331e-20	0.368538	ENSG00000211456	SACM1L
20:50095383-50095789:-	Y	Y	2.61437	2.61523e-22	4.14062e-20	0.138969	ENSG00000244687	UBE2V1
7:101164864-101164985:-	Y	Y	2.62045	2.62817e-22	4.15821e-20	0.278097	ENSG00000128564	VGF
5:138560092-138560780:-	Y	N	1.83493	2.65549e-22	4.19851e-20	0.0480109	ENSG00000113013	HSPA9
1:154167941-154169304:-	Y	Y	1.8237	2.67657e-22	4.22889e-20	0.0158307	ENSG00000143549	TPM3
17:48075101-48075988:-	Y	Y	2.6178	2.72169e-22	4.29719e-20	0.177589	ENSG00000108468	CBX1
10:102357310-102358038:+	Y	Y	3.87833	2.74334e-22	4.32836e-20	0.309671	ENSG00000107862	GBF1
1:70276845-70292145:-	Y	Y	5.83336	2.74646e-22	4.33026e-20	0.730938	ENSG00000118454	ANKRD13C
15:57707146-57707210:+	Y	N	4.61833	2.83339e-22	4.46423e-20	0.49808	ENSG00000255529	POLR2M
9:125963102-125965830:+	Y	Y	3.37663	2.84625e-22	4.48139e-20	0.205055	ENSG00000167081	PBX3
2:43925158-43925892:-	Y	Y	2.65354	2.92848e-22	4.60765e-20	0.0607661	ENSG00000138095	LRPPRC
5:138508817-138510564:-	Y	Y	4.58806	2.9613e-22	4.65607e-20	0.308069	ENSG00000120705	ETF1
2:218266148-218266442:-	Y	N	2.35022	2.9709e-22	4.66747e-20	0.186508	ENSG00000127837	AAMP
5:10254839-10255030:+	Y	N	2.52992	2.97266e-22	4.66747e-20	0.0483432	ENSG00000150753	CCT5
16:89648479-89648997:-	Y	N	3.01244	2.99883e-22	4.70531e-20	0.105727	ENSG00000131165	CHMP1A
17:1677695-1678440:-	Y	Y	3.0158	3.20906e-22	5.03168e-20	0.153667	ENSG00000174231	PRPF8
17:68512882-68512899:+	Y	N	3.18617	3.26285e-22	5.1125e-20	0.426315	ENSG00000108946	PRKAR1A
12:68624874-68641033:+	Y	Y	2.67426	3.35426e-22	5.25211e-20	0.0512755	ENSG00000127314	RAP1B
10:45462205-45463150:-	Y	Y	4.40184	3.45594e-22	5.40758e-20	0.343112	ENSG00000165406	MARCHF8
4:173527548-173527662:-	N	N	1.3614	3.50503e-22	5.48061e-20	0.132165	ENSG00000164107	HAND2
13:98000923-98001645:+	Y	Y	2.67968	3.60945e-22	5.64001e-20	0.0735809	ENSG00000065150	IPO5
1:25243655-25244070:-	Y	N	-3.34711	3.63753e-22	5.67997e-20	-0.529778	ENSG00000117616	RSRP1
12:69531515-69532013:+	N	N	6.10947	3.66514e-22	5.71916e-20	0.678366	ENSG00000166225	FRS2
3:5205242-5207152:+	Y	Y	3.30987	3.70939e-22	5.78423e-20	0.170832	ENSG00000134109	EDEM1
17:50388133-50392397:-	Y	Y	2.22506	3.77419e-22	5.88123e-20	0.0325055	ENSG00000108829	LRRC59
8:18600435-18632612:-	Y	Y	3.55946	3.78691e-22	5.897e-20	0.0999373	ENSG00000156011	PSD3
12:67270431-67270795:+	Y	N	3.27941	3.8221e-22	5.94773e-20	0.0979153	ENSG00000111530	CAND1
1:156055676-156055993:+	Y	N	3.0573	3.92577e-22	6.10487e-20	0.0892724	ENSG00000116586	LAMTOR2
1:179110805-179110845:-	Y	N	6.61967	3.96963e-22	6.16884e-20	0.763777	ENSG00000143322	ABL2
20:32846771-32848671:+	Y	Y	1.8611	4.02991e-22	6.25825e-20	0.037284	ENSG00000101367	MAPRE1
10:131935007-131939775:+	Y	Y	2.3239	4.1288e-22	6.40742e-20	0.0796769	ENSG00000175470	PPP2R2D
7:8236895-8261999:-	Y	Y	-2.18946	4.1979e-22	6.51022e-20	-0.0321446	ENSG00000003147	ICA1
19:49685038-49685161:+	Y	N	1.86075	4.25321e-22	6.59148e-20	0.0957031	ENSG00000126457	PRMT1
1:43169029-43170755:-	Y	Y	2.63745	4.28476e-22	6.63134e-20	0.0560007	ENSG00000117395	EBNA1BP2
17:44351164-44351300:+	Y	N	4.03055	4.28307e-22	6.63134e-20	0.165691	ENSG00000030582	GRN
20:45957929-45959200:-	Y	Y	3.50926	4.43253e-22	6.85536e-20	0.308197	ENSG00000198026	ZNF335
2:171022872-171023129:-	Y	N	3.72649	4.47679e-22	6.91909e-20	0.492303	ENSG00000198586	TLK1
7:108491468-108496426:-	Y	Y	3.42664	4.55593e-22	7.03662e-20	0.123963	ENSG00000135241	PNPLA8
8:73032134-73038705:+	Y	Y	3.6347	4.59916e-22	7.09857e-20	0.1669	ENSG00000147601	TERF1
14:102037524-102037793:+	Y	N	2.64254	4.68831e-22	7.23124e-20	0.196647	ENSG00000197102	DYNC1H1
21:43688246-43690287:+	Y	Y	2.63563	4.92353e-22	7.58889e-20	0.0813896	ENSG00000160208	RRP1B
X:154355073-154357250:-	Y	Y	2.53036	5.0449e-22	7.77069e-20	0.0766523	ENSG00000196924	FLNA
17:18206561-18206814:+	Y	N	3.20554	5.08096e-22	7.82092e-20	0.121032	ENSG00000091542	ALKBH5
4:139356584-139357385:+	Y	Y	3.57804	5.13768e-22	7.90287e-20	0.172639	ENSG00000164134	NAA15
18:46092199-46093179:-	Y	Y	3.34935	5.23505e-22	8.0472e-20	0.0940397	ENSG00000152234	ATP5F1A
1:110951288-110952531:-	Y	N	2.98891	5.29042e-22	8.12681e-20	0.471428	ENSG00000121931	LRIF1
6:44230112-44230331:+	Y	N	2.55571	5.44509e-22	8.35875e-20	0.379557	ENSG00000112759	SLC29A1
10:75222226-75222251:+	N	N	4.56504	5.44945e-22	8.35978e-20	0.213219	ENSG00000165637	VDAC2
7:87886844-87886894:+	Y	N	-6.36603	5.58143e-22	8.55647e-20	-0.15849	ENSG00000006634	DBF4
7:87179703-87181195:+	Y	Y	2.96235	5.71429e-22	8.75424e-20	0.305614	ENSG00000135164	DMTF1
2:71380904-71388622:+	Y	Y	2.69264	5.72778e-22	8.76898e-20	0.260065	ENSG00000075292	ZNF638
2:37254290-37256661:-	Y	Y	3.70205	5.79021e-22	8.85859e-20	0.221873	ENSG00000115825	PRKD3
15:89625787-89625935:+	Y	Y	5.04928	5.89706e-22	9.01599e-20	0.710809	ENSG00000140534	TICRR
8:125020938-125021752:+	Y	Y	2.82777	5.94247e-22	9.07931e-20	0.0922794	ENSG00000104549	SQLE
20:49092128-49094139:+	Y	Y	3.66909	6.00022e-22	9.16137e-20	0.0987729	ENSG00000124207	CSE1L
2:241242791-241243548:-	Y	Y	2.66552	6.00646e-22	9.16473e-20	0.0642261	ENSG00000115677	HDLBP
11:2386640-2390094:+	Y	Y	2.61854	6.0454e-22	9.21796e-20	0.0329193	ENSG00000110651	CD81
3:77040847-77098013:+	Y	Y	-3.12112	6.08585e-22	9.27341e-20	-0.0157568	ENSG00000185008	ROBO2
10:68907971-68910306:+	Y	Y	3.0137	6.33258e-22	9.64289e-20	0.143901	ENSG00000107625	DDX50
4:42444635-42446582:-	Y	Y	3.58355	6.36236e-22	9.67526e-20	0.23587	ENSG00000124406	ATP8A1
6:2770362-2779262:+	Y	Y	2.71717	6.3622e-22	9.67526e-20	0.184453	ENSG00000124535	WRNIP1
X:154350208-154350355:-	Y	N	2.98965	6.47608e-22	9.8416e-20	0.322292	ENSG00000196924	FLNA
10:28610822-28611009:+	Y	N	2.99372	6.58822e-22	1.00053e-19	0.264627	ENSG00000095787	WAC
19:49911105-49911172:-	Y	N	3.01753	6.61924e-22	1.00457e-19	0.38387	ENSG00000213024	NUP62
17:44093835-44110728:-	Y	Y	3.01436	6.76172e-22	1.02551e-19	0.108387	ENSG00000108840	HDAC5
16:3025989-3026044:+	Y	N	4.00944	6.80407e-22	1.03124e-19	0.543103	ENSG00000131652	THOC6
17:7850178-7851020:+	Y	Y	3.41204	6.96083e-22	1.05429e-19	0.417829	ENSG00000132510	KDM6B
19:44985304-44986454:+	Y	Y	2.5575	6.96541e-22	1.05429e-19	0.0704261	ENSG00000104853	CLPTM1
9:124356916-124383595:-	Y	Y	1.83508	6.97856e-22	1.05558e-19	0.0160013	ENSG00000136930	PSMB7
15:55195388-55195591:-	Y	N	3.88678	7.0741e-22	1.06931e-19	0.308399	ENSG00000137876	RSL24D1
11:112028977-112033403:+	Y	Y	3.08208	7.2269e-22	1.09169e-19	0.0968719	ENSG00000150768	DLAT
2:43959108-43959220:-	Y	N	3.36642	7.23976e-22	1.0929e-19	0.237815	ENSG00000138095	LRPPRC
8:67061630-67061853:-	Y	N	2.91193	7.32513e-22	1.10505e-19	0.330571	ENSG00000121022	COPS5
9:13119650-13120650:-	Y	N	4.66297	7.37292e-22	1.11152e-19	0.632333	ENSG00000107186	MPDZ
8:9008149-9009031:+	Y	Y	4.86913	7.59142e-22	1.1437e-19	0.390254	ENSG00000104626	ERI1
10:71834506-71851181:-	Y	Y	2.16496	7.74877e-22	1.16664e-19	0.0140147	ENSG00000197746	PSAP
11:83161453-83163678:+	Y	Y	4.76434	7.77326e-22	1.16955e-19	0.710116	ENSG00000165494	PCF11
8:42959315-42964310:+	Y	Y	4.00292	7.82745e-22	1.17692e-19	0.139408	ENSG00000168172	HOOK3
7:87539346-87541356:-	Y	Y	2.75261	8.04545e-22	1.20885e-19	0.114557	ENSG00000085563	ABCB1
9:89339954-89341346:+	Y	Y	3.18264	8.05043e-22	1.20885e-19	0.155903	ENSG00000187742	SECISBP2
20:31946577-31948807:-	Y	Y	2.86106	8.0887e-22	1.21379e-19	0.13992	ENSG00000088356	PDRG1
19:3979460-3979513:-	N	N	2.83204	8.19914e-22	1.22955e-19	0.0596392	ENSG00000167658	EEF2
15:55193232-55194152:-	Y	Y	3.66071	8.38416e-22	1.25647e-19	0.0989561	ENSG00000137876	RSL24D1
14:102034453-102036488:+	Y	N	2.54215	8.47929e-22	1.26988e-19	0.0289183	ENSG00000197102	DYNC1H1
3:131025595-131026187:-	Y	Y	5.59979	8.51561e-22	1.27448e-19	0.721892	ENSG00000034533	ASTE1
15:55195304-55195387:-	Y	N	3.05543	8.53292e-22	1.27623e-19	0.236947	ENSG00000137876	RSL24D1
17:81569112-81572016:-	Y	Y	2.08324	8.58136e-22	1.28263e-19	0.0447805	ENSG00000182446	NPLOC4
6:53509251-53510448:-	Y	N	3.58871	8.80792e-22	1.31563e-19	0.271	ENSG00000001084	GCLC
8:103421083-103426055:+	Y	Y	2.23595	8.83317e-22	1.31854e-19	0.0549942	ENSG00000164934	DCAF13
1:19097281-19099596:-	Y	Y	2.85262	8.84363e-22	1.31923e-19	0.164173	ENSG00000127481	UBR4
9:26913948-26916435:-	Y	Y	2.17901	8.9225e-22	1.33012e-19	0.149849	ENSG00000137055	PLAA
5:80761679-80767932:+	Y	Y	3.46964	8.97687e-22	1.33735e-19	0.11689	ENSG00000113318	MSH3
1:179110456-179110580:-	Y	Y	4.37243	9.11863e-22	1.35758e-19	0.546274	ENSG00000143322	ABL2
10:118009226-118015064:-	Y	Y	2.97699	9.25666e-22	1.37722e-19	0.136297	ENSG00000107560	RAB11FIP2
1:43972071-43972157:+	Y	Y	2.83446	9.35403e-22	1.3902e-19	0.430089	ENSG00000132768	DPH2
2:169947716-169949481:+	Y	Y	4.52546	9.35611e-22	1.3902e-19	0.517077	ENSG00000144357	UBR3
1:156137867-156138487:+	Y	N	3.17653	9.57593e-22	1.42193e-19	0.420419	ENSG00000160789	LMNA
17:64488938-64490468:-	Y	Y	4.26424	9.67464e-22	1.43565e-19	0.629224	ENSG00000256525	POLG2
5:132883561-132885075:-	Y	Y	2.63503	9.68863e-22	1.43678e-19	0.216882	ENSG00000072364	AFF4
8:29046300-29046416:+	Y	N	3.35244	9.87678e-22	1.46373e-19	0.517017	ENSG00000147421	HMBOX1
5:79397911-79401898:-	Y	Y	4.36286	1.00105e-21	1.48258e-19	0.405117	ENSG00000152413	HOMER1
20:50096059-50096270:-	Y	N	2.66846	1.00855e-21	1.49271e-19	0.203993	ENSG00000244687	UBE2V1
11:46826854-46846219:-	Y	Y	1.93511	1.03437e-21	1.52993e-19	0.0388415	ENSG00000175216	CKAP5
2:241346603-241348133:+	Y	Y	3.14113	1.08148e-21	1.59857e-19	0.0759946	ENSG00000168385	SEPTIN2
6:24714441-24716147:-	Y	Y	2.696	1.08544e-21	1.60338e-19	0.0593473	ENSG00000112308	C6orf62
1:154975105-154975530:+	Y	Y	2.5455	1.08716e-21	1.60488e-19	0.132185	ENSG00000173207	CKS1B
4:173528210-173528357:-	Y	N	1.4913	1.11796e-21	1.64927e-19	0.166193	ENSG00000164107	HAND2
8:52645868-52656007:-	Y	Y	2.52962	1.15091e-21	1.69677e-19	0.130351	ENSG00000023287	RB1CC1
6:113957287-113958426:-	Y	Y	1.76362	1.15302e-21	1.69878e-19	0.038498	ENSG00000196591	HDAC2
15:52557745-52564189:-	Y	Y	2.35741	1.15405e-21	1.69921e-19	0.0505719	ENSG00000128989	ARPP19
8:104245058-104248700:+	Y	Y	6.1934	1.16032e-21	1.70732e-19	0.512511	ENSG00000176406	RIMS2
2:42257285-42257363:+	N	N	3.63577	1.17209e-21	1.72352e-19	0.445855	ENSG00000143924	EML4
6:99416429-99425214:-	Y	Y	3.08218	1.18019e-21	1.73431e-19	0.204161	ENSG00000132424	PNISR
8:9020465-9029791:+	Y	Y	3.1529	1.20117e-21	1.764e-19	0.230543	ENSG00000104626	ERI1
3:47914940-47915950:-	Y	Y	2.46247	1.20433e-21	1.7675e-19	0.0698003	ENSG00000047849	MAP4
1:51789658-51789822:-	Y	N	2.34302	1.21911e-21	1.78803e-19	0.165154	ENSG00000078618	NRDC
1:186386084-186388441:+	Y	Y	3.19495	1.22677e-21	1.79765e-19	0.241865	ENSG00000157181	ODR4
X:47199615-47200893:+	Y	Y	2.06813	1.22725e-21	1.79765e-19	0.107974	ENSG00000130985	UBA1
2:26245442-26254246:+	Y	Y	2.2788	1.25576e-21	1.83822e-19	0.00916438	ENSG00000138029	HADHB
9:132897611-132898979:-	Y	Y	4.63908	1.33021e-21	1.94595e-19	0.466697	ENSG00000165699	TSC1
15:42239732-42244049:-	Y	Y	2.91258	1.34063e-21	1.95993e-19	0.0980817	ENSG00000103978	TMEM87A
17:75001875-75002063:+	Y	Y	3.34424	1.37113e-21	2.00323e-19	0.409254	ENSG00000109089	CDR2L
19:49875286-49875873:-	Y	Y	2.42653	1.38493e-21	2.0221e-19	0.187503	ENSG00000204673	AKT1S1
12:867866-868525:+	Y	N	2.90251	1.43246e-21	2.09015e-19	0.201734	ENSG00000060237	WNK1
10:74398580-74525255:+	Y	Y	2.55212	1.4335e-21	2.09032e-19	0.0267745	ENSG00000156110	ADK
3:47661456-47662333:-	Y	Y	3.1944	1.45377e-21	2.11852e-19	0.133575	ENSG00000173473	SMARCC1
5:179619101-179619227:-	Y	N	2.15277	1.45566e-21	2.11992e-19	0.352029	ENSG00000169045	HNRNPH1
10:45461412-45462204:-	Y	N	3.94404	1.47084e-21	2.14064e-19	0.389931	ENSG00000165406	MARCHF8
1:38016977-38017667:+	Y	N	2.71344	1.54055e-21	2.24066e-19	0.222866	ENSG00000183520	UTP11
12:103930684-103930800:+	Y	N	3.33597	1.56834e-21	2.27963e-19	0.16501	ENSG00000166598	HSP90B1
17:64502900-64502920:-	Y	N	3.43899	1.61347e-21	2.34372e-19	0.299505	ENSG00000108654	DDX5
17:38890505-38896901:+	Y	Y	3.53303	1.63486e-21	2.37328e-19	0.0968172	ENSG00000002834	LASP1
1:50121055-50128752:+	Y	Y	-2.5635	1.63629e-21	2.37383e-19	-0.0276288	ENSG00000162374	ELAVL4
X:45106542-45106649:+	Y	N	9.88432	1.65598e-21	2.40086e-19	0.834357	ENSG00000147050	KDM6A
7:87887983-87888059:+	Y	N	-5.80666	1.68276e-21	2.43813e-19	-0.300163	ENSG00000006634	DBF4
1:154262173-154262202:+	N	N	3.31884	1.6855e-21	2.44055e-19	0.266291	ENSG00000143569	UBAP2L
19:58545098-58545166:+	Y	Y	2.67222	1.69677e-21	2.45531e-19	0.157315	ENSG00000130726	TRIM28
17:82095473-82096318:-	Y	Y	1.73489	1.69871e-21	2.45653e-19	0.0483362	ENSG00000169710	FASN
2:27335429-27335597:-	Y	Y	2.89367	1.72711e-21	2.49601e-19	0.260115	ENSG00000115207	GTF3C2
5:115833667-115834352:-	Y	N	3.1418	1.72933e-21	2.49764e-19	0.240511	ENSG00000145782	ATG12
17:35650914-35651005:+	Y	N	4.96792	1.73105e-21	2.49853e-19	0.124453	ENSG00000006125	AP2B1
15:50493060-50493184:+	N	N	4.21894	1.7496e-21	2.52371e-19	0.586061	ENSG00000138592	USP8
16:56683387-56683603:+	Y	N	6.38844	1.76346e-21	2.54208e-19	0.600444	ENSG00000187193	MT1X
18:31871121-31871632:-	N	N	5.33395	1.76956e-21	2.54925e-19	0.354709	ENSG00000153339	TRAPPC8
7:141739757-141740714:+	Y	N	2.2735	1.77534e-21	2.55596e-19	0.090473	ENSG00000106028	SSBP1
3:182846036-182848475:+	Y	Y	5.00102	1.79704e-21	2.58557e-19	0.276939	ENSG00000058063	ATP11B
6:149380144-149397603:+	Y	Y	2.09631	1.80044e-21	2.58882e-19	0.0375137	ENSG00000055208	TAB2
16:28826185-28826239:+	Y	Y	2.91643	1.80175e-21	2.58905e-19	0.322137	ENSG00000168488	ATXN2L
15:57706956-57707087:+	Y	N	3.82859	1.81156e-21	2.6015e-19	0.47912	ENSG00000255529	POLR2M
5:157788019-157789362:-	Y	Y	2.35145	1.89994e-21	2.7267e-19	0.0520375	ENSG00000113282	CLINT1
5:179620773-179620813:-	Y	N	1.85689	1.92094e-21	2.7551e-19	0.308738	ENSG00000169045	HNRNPH1
16:81007446-81011929:+	Y	Y	1.93025	1.98912e-21	2.85109e-19	0.0158519	ENSG00000166451	CENPN
10:89723576-89723963:+	Y	N	4.01247	1.99401e-21	2.85629e-19	0.583975	ENSG00000138182	KIF20B
3:47338823-47340571:+	Y	Y	3.69457	2.06084e-21	2.95016e-19	0.263769	ENSG00000114648	KLHL18
19:45143634-45144853:+	Y	N	3.0932	2.0677e-21	2.95811e-19	0.356219	ENSG00000104866	PPP1R37
13:48473391-48476399:+	Y	Y	2.71609	2.07797e-21	2.97094e-19	0.0745189	ENSG00000139687	RB1
17:81104716-81105085:+	Y	Y	5.51869	2.10748e-21	3.01123e-19	0.581145	ENSG00000175866	BAIAP2
5:136172656-136172829:+	Y	N	4.67715	2.14275e-21	3.0597e-19	0.47486	ENSG00000113658	SMAD5
15:40657474-40659338:+	Y	Y	5.25169	2.18358e-21	3.11604e-19	0.643491	ENSG00000137812	KNL1
2:231166018-231166380:+	Y	N	3.13358	2.23481e-21	3.18714e-19	0.266934	ENSG00000173692	PSMD1
8:67059446-67060320:-	Y	N	2.76396	2.2402e-21	3.19282e-19	0.216369	ENSG00000121022	COPS5
18:36740839-36742736:+	Y	Y	3.98937	2.29411e-21	3.26761e-19	0.229973	ENSG00000134775	FHOD3
1:27897633-27897707:-	Y	N	-3.71672	2.3652e-21	3.36675e-19	-0.127485	ENSG00000117748	RPA2
14:102008338-102009319:+	Y	Y	3.92381	2.37786e-21	3.38266e-19	0.0812898	ENSG00000197102	DYNC1H1
3:108565898-108565931:-	N	N	4.32026	2.41327e-21	3.43088e-19	0.600175	ENSG00000163507	CIP2A
16:89931940-89932108:+	Y	N	2.26304	2.44807e-21	3.47817e-19	0.0574183	ENSG00000258947	TUBB3
12:120566981-120570202:+	Y	Y	2.14672	2.45367e-21	3.48287e-19	0.0261721	ENSG00000022840	RNF10
15:34904506-34906518:-	Y	Y	3.33968	2.45444e-21	3.48287e-19	0.20592	ENSG00000021776	AQR
12:101400382-101401061:-	Y	Y	3.62839	2.53777e-21	3.59887e-19	0.14211	ENSG00000120805	ARL1
14:57211704-57217977:-	Y	Y	2.94107	2.55551e-21	3.62175e-19	0.125331	ENSG00000070367	EXOC5
2:117819793-117821160:+	Y	Y	2.50428	2.59567e-21	3.67638e-19	0.06695	ENSG00000088205	DDX18
22:45793779-45806958:+	Y	Y	1.87324	2.62409e-21	3.71431e-19	0.0120383	ENSG00000130638	ATXN10
2:9543761-9551474:-	Y	Y	2.77213	2.66911e-21	3.77569e-19	0.12764	ENSG00000151694	ADAM17
1:151416657-151416786:-	N	N	4.26887	2.70328e-21	3.82164e-19	0.322618	ENSG00000143442	POGZ
2:70217161-70224423:-	Y	Y	1.8953	2.70938e-21	3.82788e-19	0.15089	ENSG00000116001	TIA1
1:160307163-160307245:-	Y	N	-6.07906	2.72054e-21	3.84126e-19	-0.111139	ENSG00000122218	COPA
9:36199097-36203952:+	Y	Y	1.99961	2.78092e-21	3.92407e-19	0.00995341	ENSG00000122705	CLTA
7:6639142-6641382:+	Y	Y	2.97613	2.84737e-21	4.01534e-19	0.23178	ENSG00000205903	ZNF316
1:109402091-109409927:-	Y	Y	1.78359	2.90649e-21	4.09617e-19	0.0178129	ENSG00000143106	PSMA5
17:7849948-7850071:+	Y	Y	2.95642	3.0015e-21	4.22744e-19	0.243543	ENSG00000132510	KDM6B
14:92932138-92932268:+	Y	N	-2.18187	3.05403e-21	4.29877e-19	-0.0506425	ENSG00000100604	CHGA
2:182935293-182935375:-	Y	N	-7.01552	3.06119e-21	4.30617e-19	-0.0949256	ENSG00000061676	NCKAP1
10:70162760-70162817:-	Y	N	2.24236	3.06549e-21	4.30955e-19	0.20478	ENSG00000079332	SAR1A
4:150325899-150326301:-	N	N	4.32327	3.07261e-21	4.31689e-19	0.412826	ENSG00000198589	LRBA
3:48970842-48973614:+	Y	Y	3.50569	3.09814e-21	4.35006e-19	0.250111	ENSG00000177479	ARIH2
2:26346589-26346900:+	Y	N	3.32798	3.13081e-21	4.39322e-19	0.472796	ENSG00000138018	SELENOI
X:47196947-47197024:+	N	N	2.11669	3.13707e-21	4.39929e-19	0.325103	ENSG00000130985	UBA1
17:39990198-39992997:+	Y	Y	1.90975	3.14769e-21	4.41145e-19	0.0278108	ENSG00000108344	PSMD3
2:169986795-169994322:+	Y	Y	3.77307	3.19202e-21	4.47082e-19	0.0848897	ENSG00000144357	UBR3
1:11020600-11022123:+	Y	Y	2.475	3.19464e-21	4.47173e-19	0.173155	ENSG00000120948	TARDBP
7:11022980-11028680:+	Y	Y	2.50828	3.25139e-21	4.54836e-19	0.107422	ENSG00000106443	PHF14
1:43171122-43171440:-	Y	N	3.20481	3.25555e-21	4.55137e-19	0.134308	ENSG00000117395	EBNA1BP2
17:7852637-7852999:+	Y	Y	3.11547	3.34906e-21	4.67923e-19	0.361301	ENSG00000132510	KDM6B
18:166820-178900:+	Y	Y	2.02514	3.3663e-21	4.70042e-19	0.0332518	ENSG00000101557	USP14
6:136269264-136269303:-	Y	N	5.60283	3.39282e-21	4.73454e-19	0.715728	ENSG00000029363	BCLAF1
11:73409662-73411393:-	Y	Y	2.59837	3.41227e-21	4.75875e-19	0.0959843	ENSG00000054965	FAM168A
1:77584830-77584908:-	Y	N	4.95836	3.57764e-21	4.98631e-19	0.56865	ENSG00000036549	ZZZ3
16:21965534-21968461:+	Y	Y	2.82316	3.58197e-21	4.98929e-19	0.0730444	ENSG00000140740	UQCRC2
1:28229024-28230130:-	Y	Y	3.25785	3.64959e-21	5.08036e-19	0.0669722	ENSG00000126698	DNAJC8
17:4016775-4017370:-	Y	N	4.37659	3.71911e-21	5.17396e-19	0.554032	ENSG00000074755	ZZEF1
12:53452377-53452816:+	Y	Y	2.38309	3.75468e-21	5.22025e-19	0.0511186	ENSG00000197111	PCBP2
15:60364524-60374451:-	Y	Y	2.00655	3.80543e-21	5.28757e-19	0.0109754	ENSG00000182718	ANXA2
2:197402421-197402452:-	Y	N	5.12675	3.90843e-21	5.42737e-19	0.290035	ENSG00000115524	SF3B1
5:134723671-134724979:+	Y	Y	4.13843	3.92329e-21	5.44467e-19	0.421315	ENSG00000113615	SEC24A
2:231057173-231057540:+	Y	N	3.53558	3.94317e-21	5.46891e-19	0.0903501	ENSG00000173692	PSMD1
3:48652554-48653001:-	Y	Y	3.73297	4.10465e-21	5.6894e-19	0.553082	ENSG00000008300	CELSR3
3:45394688-45399563:+	Y	Y	3.21914	4.11946e-21	5.70644e-19	0.0902797	ENSG00000011376	LARS2
4:189954614-189955036:+	N	N	3.84613	4.12429e-21	5.70965e-19	0.206062	ENSG00000109536	FRG1
7:157207936-157216866:+	Y	Y	1.91542	4.24669e-21	5.87551e-19	0.0538707	ENSG00000009335	UBE3C
2:85540001-85541082:+	Y	Y	2.65659	4.29367e-21	5.9369e-19	0.269166	ENSG00000168906	MAT2A
4:24537174-24539150:-	Y	N	1.65371	4.34649e-21	6.00628e-19	0.0714654	ENSG00000109606	DHX15
16:71924408-71924768:+	Y	N	2.63502	4.39061e-21	6.06355e-19	0.312037	ENSG00000182149	IST1
7:149239803-149240056:+	Y	N	4.1743	4.5293e-21	6.25129e-19	0.606595	ENSG00000170260	ZNF212
6:136268672-136269088:-	Y	Y	2.50951	4.55101e-21	6.27744e-19	0.217424	ENSG00000029363	BCLAF1
1:43970870-43970905:+	Y	N	2.76647	4.59791e-21	6.33827e-19	0.375741	ENSG00000132768	DPH2
9:35714877-35715058:-	Y	Y	4.47371	4.64944e-21	6.40542e-19	0.3566	ENSG00000137076	TLN1
17:63821844-63821983:-	Y	N	3.22546	4.71333e-21	6.4895e-19	0.344604	ENSG00000108592	FTSJ3
16:3026917-3027010:+	Y	Y	3.13775	4.89488e-21	6.73538e-19	0.318483	ENSG00000131652	THOC6
6:154815817-154818478:+	Y	Y	2.40967	4.95494e-21	6.8139e-19	0.077372	ENSG00000213079	SCAF8
18:35339977-35340230:-	Y	Y	2.36931	5.04968e-21	6.93997e-19	0.120103	ENSG00000172466	ZNF24
13:77053919-77054007:-	N	N	6.06071	5.09951e-21	7.00423e-19	0.765365	ENSG00000005810	MYCBP2
8:22606704-22606907:+	Y	Y	3.28493	5.1462e-21	7.06407e-19	0.0988253	ENSG00000158941	CCAR2
9:97662145-97662953:+	Y	Y	2.69022	5.20037e-21	7.13413e-19	0.243985	ENSG00000136937	NCBP1
12:76402767-76410563:-	Y	Y	3.21107	5.23035e-21	7.17092e-19	0.0757115	ENSG00000091039	OSBPL8
14:102086419-102086985:-	Y	Y	2.54622	5.24071e-21	7.18078e-19	0.0156147	ENSG00000080824	HSP90AA1
7:108001734-108001936:-	Y	N	-3.30377	5.26528e-21	7.21009e-19	-0.277346	ENSG00000091136	LAMB1
5:6622016-6622100:-	Y	N	-5.68503	5.35044e-21	7.3223e-19	-0.141394	ENSG00000037474	NSUN2
9:127449378-127449521:-	N	N	3.06768	5.40302e-21	7.3898e-19	0.0782826	ENSG00000197958	RPL12
9:128378107-128387815:+	Y	Y	1.83835	5.48884e-21	7.50266e-19	0.0377755	ENSG00000167118	URM1
10:26740818-26742496:+	Y	Y	3.19443	5.53752e-21	7.56465e-19	0.230864	ENSG00000148459	PDSS1
2:197393189-197393351:-	Y	N	3.34904	5.55748e-21	7.58734e-19	0.292672	ENSG00000115524	SF3B1
1:92833389-92833458:+	Y	N	-3.57218	5.62287e-21	7.672e-19	-0.175377	ENSG00000122406	RPL5
19:1905440-1907184:+	Y	N	2.36873	5.67411e-21	7.73727e-19	0.0778906	ENSG00000227500	SCAMP4
13:45959647-45962175:-	Y	Y	4.24757	5.76127e-21	7.8467e-19	0.192813	ENSG00000123200	ZC3H13
17:41983637-41986067:-	Y	N	2.43821	5.7589e-21	7.8467e-19	0.101986	ENSG00000168259	DNAJC7
6:31531406-31531671:-	Y	N	2.49944	5.76774e-21	7.8508e-19	0.302168	ENSG00000198563	DDX39B
21:45278170-45280959:-	Y	Y	2.8631	5.80861e-21	7.90169e-19	0.25383	ENSG00000186866	POFUT2
7:27803181-27816348:+	Y	Y	2.33569	5.90606e-21	8.02945e-19	0.0379148	ENSG00000106052	TAX1BP1
5:138510630-138511044:-	Y	Y	4.0983	5.95824e-21	8.09554e-19	0.445485	ENSG00000120705	ETF1
13:98001646-98002466:+	Y	N	2.89049	5.98307e-21	8.12442e-19	0.0716023	ENSG00000065150	IPO5
5:138338308-138341139:+	Y	Y	1.74835	6.07162e-21	8.23973e-19	0.0450608	ENSG00000120709	FAM53C
7:158773397-158788003:-	Y	Y	2.33682	6.38288e-21	8.65696e-19	0.038684	ENSG00000117868	ESYT2
9:36203953-36204067:+	N	N	2.98506	6.44365e-21	8.73416e-19	0.130717	ENSG00000122705	CLTA
X:53569828-53573749:-	Y	Y	3.30927	6.45255e-21	8.74102e-19	0.0963347	ENSG00000086758	HUWE1
10:96522331-96527212:-	Y	Y	2.01933	6.50097e-21	8.80136e-19	0.0359799	ENSG00000077147	TM9SF3
1:243176702-243176816:-	Y	N	5.4228	6.5631e-21	8.88018e-19	0.380879	ENSG00000143702	CEP170
4:75950798-75955974:-	Y	Y	2.44979	6.67188e-21	9.02198e-19	0.0518278	ENSG00000198301	SDAD1
2:231166492-231167229:+	Y	N	3.46955	6.6821e-21	9.03042e-19	0.243317	ENSG00000173692	PSMD1
9:35066818-35066900:-	Y	N	2.39947	6.73246e-21	9.09307e-19	0.154856	ENSG00000165280	VCP
1:236561272-236564497:-	Y	Y	2.58298	6.77152e-21	9.14039e-19	0.179329	ENSG00000119285	HEATR1
5:134176614-134176685:-	Y	N	3.85302	6.90077e-21	9.30931e-19	0.332736	ENSG00000113558	SKP1
11:103079998-103082747:-	Y	Y	2.78967	6.94525e-21	9.36376e-19	0.139062	ENSG00000137692	DCUN1D5
12:67269901-67270260:+	Y	N	3.26511	6.98017e-21	9.40526e-19	0.132211	ENSG00000111530	CAND1
1:117466428-117493146:+	Y	Y	3.32512	7.36334e-21	9.91566e-19	0.0773855	ENSG00000198162	MAN1A2
6:57210446-57221318:-	Y	Y	3.64296	7.48075e-21	1.00678e-18	0.347355	ENSG00000112210	RAB23
7:107173592-107174447:+	Y	Y	3.03647	7.52144e-21	1.01166e-18	0.155319	ENSG00000105856	HBP1
17:48075989-48076000:-	Y	N	4.28846	7.57802e-21	1.01866e-18	0.343722	ENSG00000108468	CBX1
3:186788323-186788368:+	Y	N	2.33278	7.61951e-21	1.02363e-18	0.174034	ENSG00000156976	EIF4A2
3:184177068-184177542:+	Y	Y	2.94537	7.63621e-21	1.02527e-18	0.0719546	ENSG00000161203	AP2M1
17:8443927-8444176:+	Y	N	5.64878	7.72232e-21	1.03622e-18	0.690155	ENSG00000166579	NDEL1
14:50461059-50461361:-	N	N	5.96602	7.88232e-21	1.05706e-18	0.291961	ENSG00000012983	MAP4K5
1:235112109-235113767:-	Y	Y	1.77021	7.98516e-21	1.07022e-18	0.0252735	ENSG00000173726	TOMM20
3:136473638-136477288:-	Y	Y	3.16859	8.15642e-21	1.09253e-18	0.103957	ENSG00000118007	STAG1
17:81870266-81870635:-	Y	Y	2.0471	8.19924e-21	1.09762e-18	0.0292733	ENSG00000141522	ARHGDIA
20:35304070-35304626:-	Y	Y	2.80408	8.38978e-21	1.12247e-18	0.377454	ENSG00000101019	UQCC1
6:170546185-170549005:-	Y	Y	2.32221	8.41413e-21	1.12506e-18	0.0122538	ENSG00000008018	PSMB1
5:14381253-14387342:+	Y	Y	3.24294	8.46806e-21	1.13161e-18	0.106423	ENSG00000038382	TRIO
8:143805436-143806406:-	Y	Y	2.01634	8.51064e-21	1.13663e-18	0.168427	ENSG00000180900	SCRIB
11:59789202-59790518:+	Y	Y	2.95486	8.77961e-21	1.17186e-18	0.1151	ENSG00000166900	STX3
17:38395445-38395847:+	Y	Y	4.14746	8.89874e-21	1.18706e-18	0.498362	ENSG00000274211	SOCS7
12:25235227-25245273:-	Y	Y	2.75308	8.94857e-21	1.19301e-18	0.13166	ENSG00000133703	KRAS
17:29502724-29507895:+	Y	Y	3.07729	8.97005e-21	1.19517e-18	0.041912	ENSG00000160551	TAOK1
20:45796574-45801073:+	Y	Y	2.66415	9.26729e-21	1.23405e-18	0.0848566	ENSG00000101457	DNTTIP1
19:33464063-33477079:-	Y	Y	2.07639	9.3283e-21	1.24145e-18	0.0121657	ENSG00000124299	PEPD
11:46776384-46777438:-	Y	Y	2.76359	9.36109e-21	1.24508e-18	0.212581	ENSG00000175216	CKAP5
7:81971090-81971776:-	Y	Y	2.92464	9.39202e-21	1.24846e-18	0.236775	ENSG00000153956	CACNA2D1
14:96547919-96552479:+	Y	Y	2.34902	9.41232e-21	1.25043e-18	0.0273055	ENSG00000090060	PAPOLA
6:3226670-3227262:-	Y	N	2.20818	9.74096e-21	1.29333e-18	0.0913158	ENSG00000137285	TUBB2B
9:107325005-107329542:+	Y	Y	1.97954	9.84148e-21	1.30591e-18	0.0174164	ENSG00000119318	RAD23B
8:41964625-41973403:-	Y	Y	2.79415	9.95853e-21	1.32067e-18	0.113974	ENSG00000083168	KAT6A
2:241316576-241317498:+	Y	Y	1.64028	1.02172e-20	1.35419e-18	0.0616796	ENSG00000168385	SEPTIN2
10:21731055-21732898:+	Y	Y	4.66801	1.03192e-20	1.36691e-18	0.578542	ENSG00000078403	MLLT10
2:182934752-182934832:-	Y	N	-6.99127	1.04704e-20	1.38613e-18	-0.133601	ENSG00000061676	NCKAP1
7:10990848-11013746:+	Y	Y	1.85333	1.04931e-20	1.38833e-18	0.0326272	ENSG00000106443	PHF14
2:20318646-20326260:-	Y	Y	3.58027	1.07756e-20	1.42488e-18	0.182977	ENSG00000055917	PUM2
2:96353403-96354182:+	Y	Y	3.1261	1.08087e-20	1.42841e-18	0.140939	ENSG00000121152	NCAPH
2:131120979-131125752:+	Y	Y	2.88076	1.09222e-20	1.44258e-18	0.0596271	ENSG00000115762	PLEKHB2
1:197092057-197093051:-	Y	Y	2.72111	1.09812e-20	1.44953e-18	0.0925046	ENSG00000066279	ASPM
3:169983940-169985128:+	Y	Y	2.92737	1.10714e-20	1.46059e-18	0.168245	ENSG00000008952	SEC62
8:47819511-47820718:-	Y	Y	3.59267	1.12152e-20	1.47869e-18	0.063986	ENSG00000253729	PRKDC
1:163152739-163161914:-	Y	Y	-2.49172	1.15452e-20	1.52122e-18	-0.00174123	ENSG00000143248	RGS5
12:53474869-53476070:+	Y	N	1.83178	1.15512e-20	1.52122e-18	0.0296113	ENSG00000197111	PCBP2
1:23510149-23516334:-	Y	Y	-2.26162	1.1609e-20	1.52796e-18	-0.0181924	ENSG00000007968	E2F2
2:43943895-43945292:-	Y	N	3.01858	1.17314e-20	1.54317e-18	0.0514339	ENSG00000138095	LRPPRC
20:36499322-36499587:+	N	N	2.60759	1.18015e-20	1.55149e-18	0.233454	ENSG00000080845	DLGAP4
7:6146249-6147738:+	Y	Y	2.88807	1.19579e-20	1.57114e-18	0.233467	ENSG00000106346	USP42
14:103521648-103521682:-	Y	N	2.31889	1.19658e-20	1.57127e-18	0.283311	ENSG00000166165	CKB
X:48575996-48576068:+	Y	N	2.17763	1.20629e-20	1.58311e-18	0.297956	ENSG00000102317	RBM3
11:64197177-64197189:+	Y	Y	5.49445	1.24535e-20	1.63342e-18	0.154725	ENSG00000168439	STIP1
12:21508562-21512294:+	Y	Y	2.25979	1.27264e-20	1.66826e-18	0.0744494	ENSG00000111711	GOLT1B
11:46696157-46697020:-	Y	Y	3.13939	1.29317e-20	1.69419e-18	0.0935798	ENSG00000175220	ARHGAP1
19:12970536-12973388:+	Y	Y	-3.92916	1.2944e-20	1.69483e-18	-0.0778865	ENSG00000179284	DAND5
14:91473371-91474640:-	Y	Y	2.28792	1.3348e-20	1.74671e-18	0.1634	ENSG00000100796	PPP4R3A
8:103053983-103055867:+	Y	Y	3.21073	1.3709e-20	1.79292e-18	0.141035	ENSG00000155097	ATP6V1C1
6:33413297-33413408:+	Y	Y	3.4249	1.37633e-20	1.79898e-18	0.473253	ENSG00000112511	PHF1
12:108554199-108560216:-	Y	Y	2.87946	1.39563e-20	1.82317e-18	0.130443	ENSG00000075856	SART3
7:103095727-103097276:+	Y	N	2.26974	1.42093e-20	1.85515e-18	0.06426	ENSG00000170632	ARMC10
14:105010634-105010874:-	Y	N	-15.8793	1.43447e-20	1.87174e-18	-0.306246	ENSG00000170779	CDCA4
20:41029456-41061393:+	Y	Y	3.15995	1.44028e-20	1.87825e-18	0.107847	ENSG00000198900	TOP1
6:31729797-31730050:-	Y	Y	3.17597	1.45079e-20	1.89086e-18	0.387153	ENSG00000213722	DDAH2
10:102676942-102685815:-	Y	Y	2.39106	1.45398e-20	1.89394e-18	0.042871	ENSG00000138175	ARL3
9:129828442-129829204:-	Y	N	4.18889	1.45889e-20	1.89924e-18	0.189889	ENSG00000136819	C9orf78
8:52636070-52642350:-	Y	Y	3.44731	1.48261e-20	1.92902e-18	0.260851	ENSG00000023287	RB1CC1
7:131472268-131478470:+	Y	Y	3.55417	1.49042e-20	1.93806e-18	0.370182	ENSG00000128585	MKLN1
7:23513083-23513590:-	N	N	2.2125	1.52079e-20	1.97642e-18	0.0907715	ENSG00000164548	TRA2A
X:53543710-53543840:-	Y	N	3.4711	1.52809e-20	1.98478e-18	0.390721	ENSG00000086758	HUWE1
1:227005112-227010877:-	Y	Y	2.68291	1.56791e-20	2.03534e-18	0.0994341	ENSG00000143776	CDC42BPA
1:23757126-23759511:+	Y	Y	2.98309	1.58425e-20	2.05538e-18	0.131995	ENSG00000011007	ELOA
1:228091072-228096450:+	Y	Y	1.6741	1.62257e-20	2.10389e-18	0.00485452	ENSG00000143761	ARF1
X:41162790-41162877:+	Y	N	-7.65954	1.66683e-20	2.16004e-18	-0.270686	ENSG00000124486	USP9X
2:131091809-131091960:-	N	N	2.33224	1.66872e-20	2.16126e-18	0.371874	ENSG00000152102	FAM168B
17:60183454-60185459:-	Y	Y	3.51702	1.69117e-20	2.18908e-18	0.186607	ENSG00000170832	USP32
14:102086379-102086418:-	N	N	2.45384	1.69588e-20	2.19393e-18	0.0720767	ENSG00000080824	HSP90AA1
21:32362022-32363155:-	Y	Y	3.82287	1.70338e-20	2.20237e-18	0.27928	ENSG00000142207	URB1
9:35722224-35722860:-	Y	Y	3.08578	1.71221e-20	2.21253e-18	0.1669	ENSG00000137076	TLN1
11:72241290-72243787:-	Y	Y	-2.58767	1.72374e-20	2.22616e-18	-0.0895967	ENSG00000165462	PHOX2A
13:47997024-48000906:-	Y	Y	3.34093	1.79315e-20	2.31449e-18	0.203623	ENSG00000136143	SUCLA2
11:62798845-62799256:-	Y	N	2.28793	1.81067e-20	2.33578e-18	0.374199	ENSG00000162231	NXF1
1:160353502-160354117:+	Y	N	2.84307	1.82534e-20	2.35336e-18	0.232222	ENSG00000162736	NCSTN
7:100095471-100095664:-	Y	N	1.15903	1.83186e-20	2.36042e-18	0.116615	ENSG00000166508	MCM7
21:25752349-25758009:+	Y	Y	3.62866	1.83907e-20	2.36837e-18	0.136584	ENSG00000154727	GABPA
1:227748234-227749248:+	Y	Y	3.97323	1.89909e-20	2.44428e-18	0.223537	ENSG00000143740	SNAP47
14:23566809-23567110:-	Y	N	-2.8634	1.92989e-20	2.48252e-18	-0.296211	ENSG00000213983	AP1G2
4:75961105-75961210:-	Y	Y	4.29843	1.98472e-20	2.5502e-18	0.492917	ENSG00000198301	SDAD1
6:170537341-170543600:-	Y	Y	2.89972	1.98697e-20	2.5502e-18	0.0630682	ENSG00000008018	PSMB1
7:151375944-151376633:+	Y	Y	3.33449	1.987e-20	2.5502e-18	0.247389	ENSG00000013374	NUB1
17:68512900-68512909:+	Y	N	2.85024	1.98516e-20	2.5502e-18	0.350824	ENSG00000108946	PRKAR1A
6:100601936-100605567:-	Y	Y	3.90693	1.99042e-20	2.55314e-18	0.231232	ENSG00000112249	ASCC3
16:4868904-4870211:+	Y	Y	3.35318	2.01416e-20	2.58214e-18	0.167932	ENSG00000118900	UBN1
2:3641433-3643443:+	Y	Y	2.83738	2.06612e-20	2.64726e-18	0.127027	ENSG00000118004	COLEC11
2:85539604-85539641:+	Y	N	2.73285	2.07061e-20	2.65152e-18	0.387676	ENSG00000168906	MAT2A
20:62140945-62142474:-	Y	Y	1.78968	2.12067e-20	2.71409e-18	0.0133879	ENSG00000101182	PSMA7
12:131723310-131725404:+	Y	Y	3.70029	2.12564e-20	2.71892e-18	0.180516	ENSG00000061936	SFSWAP
1:10345954-10347760:+	Y	Y	4.15051	2.13107e-20	2.72433e-18	0.224903	ENSG00000054523	KIF1B
12:123974021-123974553:+	Y	N	2.00611	2.1658e-20	2.76716e-18	0.0928858	ENSG00000179195	ZNF664
17:32361468-32361515:+	Y	N	-2.18666	2.17264e-20	2.77434e-18	-0.127808	ENSG00000010244	ZNF207
1:112661253-112666919:+	Y	Y	2.20818	2.19387e-20	2.79989e-18	0.0182399	ENSG00000116489	CAPZA1
1:222568829-222569424:-	Y	N	4.07146	2.22173e-20	2.83385e-18	0.604784	ENSG00000143498	TAF1A
12:104334333-104339138:+	Y	Y	2.44653	2.2414e-20	2.85732e-18	0.0147492	ENSG00000198431	TXNRD1
3:122437296-122442037:-	Y	Y	3.21111	2.25374e-20	2.87145e-18	0.0966553	ENSG00000114030	KPNA1
7:100673924-100675285:+	Y	Y	1.76443	2.31071e-20	2.94237e-18	0.0326318	ENSG00000172354	GNB2
2:53923119-53923320:-	Y	Y	3.11621	2.33841e-20	2.97598e-18	0.14784	ENSG00000068878	PSME4
2:171715444-171725617:+	Y	Y	2.39732	2.34773e-20	2.98616e-18	0.0483939	ENSG00000077380	DYNC1I2
11:108692039-108693515:+	Y	Y	4.78918	2.3579e-20	2.99743e-18	0.165148	ENSG00000178105	DDX10
15:41027737-41044903:-	Y	Y	4.25502	2.36918e-20	3.01008e-18	0.477608	ENSG00000128908	INO80
19:10322740-10323144:-	Y	Y	3.38674	2.37365e-20	3.01406e-18	0.307101	ENSG00000161847	RAVER1
15:55195592-55195822:-	N	N	3.62334	2.37991e-20	3.02033e-18	0.201882	ENSG00000137876	RSL24D1
12:108649672-108652044:-	Y	Y	2.43374	2.41627e-20	3.06476e-18	0.05832	ENSG00000110880	CORO1C
22:32493282-32495492:+	Y	Y	2.76599	2.45832e-20	3.11636e-18	0.102314	ENSG00000100225	FBXO7
1:44747701-44750308:+	Y	Y	2.68775	2.47808e-20	3.13966e-18	0.0345441	ENSG00000142945	KIF2C
11:72021292-72022201:-	Y	Y	2.55153	2.50556e-20	3.1727e-18	0.147972	ENSG00000137497	NUMA1
9:89334731-89338457:+	Y	Y	2.80506	2.51676e-20	3.18511e-18	0.118292	ENSG00000187742	SECISBP2
12:50086879-50086917:+	Y	N	3.38054	2.56335e-20	3.24226e-18	0.349352	ENSG00000066117	SMARCD1
9:97663048-97664339:+	Y	Y	3.00862	2.56551e-20	3.24297e-18	0.0920134	ENSG00000136937	NCBP1
13:45492251-45493346:+	Y	Y	4.26504	2.56677e-20	3.24297e-18	0.461183	ENSG00000136152	COG3
3:133041856-133045901:+	Y	Y	-3.1888	2.60691e-20	3.29185e-18	-0.00716505	ENSG00000144868	TMEM108
22:35286062-35286881:+	Y	Y	5.24572	2.72481e-20	3.43882e-18	0.451922	ENSG00000100281	HMGXB4
11:27506317-27506455:-	N	N	3.34601	2.7399e-20	3.45595e-18	0.351838	ENSG00000148943	LIN7C
9:120491478-120517683:-	Y	Y	3.68451	2.74307e-20	3.45803e-18	0.208547	ENSG00000136861	CDK5RAP2
1:75793382-75794083:+	Y	N	3.17606	2.75137e-20	3.46656e-18	0.41119	ENSG00000137955	RABGGTB
5:43298144-43298445:-	Y	N	2.90345	2.78322e-20	3.50474e-18	0.273952	ENSG00000112972	HMGCS1
9:128622103-128624327:+	Y	Y	3.48409	2.78619e-20	3.50654e-18	0.195722	ENSG00000197694	SPTAN1
19:46728316-46728331:-	Y	N	7.12078	2.83278e-20	3.5632e-18	0.247482	ENSG00000090372	STRN4
12:68733613-68734707:+	Y	Y	2.47198	2.86932e-20	3.60716e-18	0.0940775	ENSG00000111581	NUP107
13:77051919-77052700:-	Y	N	4.52885	2.8817e-20	3.62073e-18	0.336558	ENSG00000005810	MYCBP2
8:52686968-52714074:-	Y	Y	2.70943	2.90157e-20	3.64367e-18	0.12907	ENSG00000023287	RB1CC1
2:66512295-66547942:+	Y	Y	-2.29488	2.91543e-20	3.65905e-18	-0.0201371	ENSG00000143995	MEIS1
3:142421154-142421475:-	Y	Y	5.69955	2.92481e-20	3.66879e-18	0.596631	ENSG00000114127	XRN1
1:163161977-163168257:-	Y	Y	-2.06054	2.95757e-20	3.70784e-18	-0.00134791	ENSG00000143248	RGS5
3:9429010-9429325:+	Y	N	2.74682	2.98097e-20	3.73511e-18	0.349227	ENSG00000168137	SETD5
2:73239332-73239622:+	Y	Y	3.42753	3.02605e-20	3.78951e-18	0.0279562	ENSG00000135624	CCT7
1:117442326-117460488:+	Y	Y	2.74669	3.06815e-20	3.84011e-18	0.0720726	ENSG00000198162	MAN1A2
2:231057042-231057172:+	Y	Y	3.52763	3.11458e-20	3.89607e-18	0.13361	ENSG00000173692	PSMD1
17:64502550-64502584:-	Y	N	3.55478	3.14588e-20	3.93306e-18	0.257757	ENSG00000108654	DDX5
2:43890275-43890362:-	Y	N	4.62898	3.15291e-20	3.93968e-18	0.251872	ENSG00000138095	LRPPRC
5:171400211-171400229:+	Y	N	3.21714	3.1809e-20	3.97247e-18	0.238608	ENSG00000181163	NPM1
18:56603057-56604435:-	Y	Y	2.48205	3.22217e-20	4.02179e-18	0.0473581	ENSG00000091164	TXNL1
17:44117705-44123253:-	Y	Y	4.1954	3.22653e-20	4.02503e-18	0.322725	ENSG00000108840	HDAC5
5:138558970-138559039:-	Y	Y	2.85493	3.34987e-20	4.1743e-18	0.178687	ENSG00000113013	HSPA9
18:46097836-46098171:-	Y	N	2.51793	3.34831e-20	4.1743e-18	0.146349	ENSG00000152234	ATP5F1A
14:21262769-21262992:-	Y	N	2.58295	3.44084e-20	4.2853e-18	0.260869	ENSG00000092199	HNRNPC
17:59656232-59658661:+	Y	Y	2.14012	3.51701e-20	4.37777e-18	0.0111145	ENSG00000141367	CLTC
X:41216653-41217219:+	Y	Y	3.44536	3.55185e-20	4.41872e-18	0.320229	ENSG00000124486	USP9X
20:21326602-21328558:+	Y	Y	1.86477	3.58273e-20	4.45469e-18	0.0364131	ENSG00000088930	XRN2
10:59806444-59806921:-	Y	N	4.15331	3.68181e-20	4.57538e-18	0.218423	ENSG00000108091	CCDC6
3:143051050-143053675:+	Y	Y	4.30858	3.71759e-20	4.61731e-18	0.42632	ENSG00000163714	U2SURP
10:45533290-45535210:-	Y	Y	4.40814	3.83319e-20	4.75829e-18	0.0809271	ENSG00000165406	MARCHF8
16:74468406-74468945:-	Y	N	3.32194	3.89457e-20	4.83184e-18	0.20319	ENSG00000090863	GLG1
17:31982999-31983104:+	Y	N	-3.64226	3.90594e-20	4.84331e-18	-0.263517	ENSG00000178691	SUZ12
16:84091849-84093187:-	Y	Y	3.70175	3.93828e-20	4.88073e-18	0.259975	ENSG00000140943	MBTPS1
10:102484377-102485608:-	Y	Y	3.08211	4.0241e-20	4.98437e-18	0.0643363	ENSG00000138107	ACTR1A
1:54875212-54875941:-	Y	Y	2.5692	4.05815e-20	5.02381e-18	0.117256	ENSG00000116133	DHCR24
8:17960445-17961041:+	Y	Y	3.39469	4.07843e-20	5.04617e-18	0.116076	ENSG00000078674	PCM1
17:48908821-48910347:+	Y	Y	2.37469	4.1389e-20	5.1182e-18	0.254185	ENSG00000159202	UBE2Z
2:43892347-43894544:-	Y	Y	3.10872	4.19081e-20	5.17956e-18	0.0400906	ENSG00000138095	LRPPRC
14:20316561-20317595:-	Y	Y	2.1884	4.25541e-20	5.25654e-18	0.0836733	ENSG00000100814	CCNB1IP1
18:63362869-63365961:-	Y	Y	3.59492	4.25925e-20	5.25842e-18	0.354175	ENSG00000119537	KDSR
4:2900314-2902914:+	Y	N	1.82182	4.4405e-20	5.47922e-18	0.0311462	ENSG00000087274	ADD1
5:175510313-175511435:+	Y	Y	3.01646	4.45868e-20	5.49866e-18	0.092923	ENSG00000164466	SFXN1
17:59685809-59687000:+	Y	Y	1.70593	4.60249e-20	5.67293e-18	0.0325964	ENSG00000141367	CLTC
1:37705114-37705440:+	N	N	4.0276	4.66604e-20	5.74814e-18	0.530424	ENSG00000134690	CDCA8
1:3783770-3783911:-	Y	N	3.3838	4.81011e-20	5.92241e-18	0.15758	ENSG00000130764	LRRC47
12:108537106-108537487:-	Y	N	3.77794	4.91983e-20	6.05422e-18	0.404556	ENSG00000075856	SART3
9:77920662-77920702:-	N	N	3.80284	5.13884e-20	6.3203e-18	0.349696	ENSG00000156052	GNAQ
12:56664801-56665631:-	Y	Y	1.99572	5.18211e-20	6.37007e-18	0.0612043	ENSG00000110958	PTGES3
11:62824566-62825024:-	Y	N	3.00833	5.19456e-20	6.38192e-18	0.30308	ENSG00000162236	STX5
16:72103789-72103921:+	Y	N	3.59619	5.23857e-20	6.43251e-18	0.54595	ENSG00000140829	DHX38
10:28611616-28611773:+	Y	N	3.25714	5.30267e-20	6.50769e-18	0.300332	ENSG00000095787	WAC
20:49123236-49124374:-	Y	Y	3.55925	5.39701e-20	6.61989e-18	0.143501	ENSG00000124214	STAU1
4:143526461-143527867:+	Y	Y	2.93677	5.65255e-20	6.92959e-18	0.0508414	ENSG00000153147	SMARCA5
14:59610233-59630445:-	Y	Y	-2.43524	5.68929e-20	6.97087e-18	-0.0195238	ENSG00000139970	RTN1
16:227657-227686:-	Y	N	-2.87793	5.71138e-20	6.99416e-18	-0.457272	ENSG00000007392	LUC7L
17:49607930-49611279:-	Y	Y	2.44638	5.74691e-20	7.03388e-18	0.0837146	ENSG00000121067	SPOP
9:6434349-6460572:+	Y	Y	3.47114	5.7881e-20	7.08047e-18	0.200258	ENSG00000147854	UHRF2
14:88480353-88485075:-	Y	Y	2.75564	5.80556e-20	7.09801e-18	0.11296	ENSG00000070778	PTPN21
1:64841340-64841450:-	Y	Y	5.61788	5.87119e-20	7.17439e-18	0.375969	ENSG00000162434	JAK1
3:128620594-128622163:-	Y	Y	3.09866	5.92236e-20	7.23302e-18	0.0695974	ENSG00000163902	RPN1
7:131414711-131429032:+	Y	Y	2.46224	5.93607e-20	7.24587e-18	0.149547	ENSG00000128585	MKLN1
1:222684636-222684697:-	N	N	4.17505	5.96076e-20	7.2721e-18	0.393643	ENSG00000186063	AIDA
16:53319813-53319951:+	Y	N	6.12751	6.07963e-20	7.41313e-18	0.780019	ENSG00000177200	CHD9
1:51789823-51790532:-	Y	Y	2.2025	6.08456e-20	7.41517e-18	0.0742863	ENSG00000078618	NRDC
15:60391298-60393012:-	Y	Y	2.90579	6.18498e-20	7.5335e-18	0.011462	ENSG00000182718	ANXA2
13:31141260-31143791:-	Y	Y	1.78395	6.22463e-20	7.57773e-18	0.0259135	ENSG00000120694	HSPH1
7:141739191-141739756:+	Y	N	2.05427	6.27349e-20	7.63312e-18	0.110445	ENSG00000106028	SSBP1
1:52411201-52412513:+	Y	Y	3.02867	6.34258e-20	7.71304e-18	0.159911	ENSG00000134748	PRPF38A
2:11746672-11763022:+	Y	Y	2.12837	6.62504e-20	8.05223e-18	0.086257	ENSG00000134324	LPIN1
9:128600116-128601344:+	Y	Y	2.88689	6.64851e-20	8.07643e-18	0.071959	ENSG00000197694	SPTAN1
6:44250600-44251047:+	Y	Y	1.97935	6.65887e-20	8.08126e-18	0.0544341	ENSG00000096384	HSP90AB1
20:35630491-35630740:-	Y	N	1.64388	6.65961e-20	8.08126e-18	0.200422	ENSG00000214078	CPNE1
3:23963331-23964763:+	Y	Y	4.49949	6.711e-20	8.13927e-18	0.295623	ENSG00000174738	NR1D2
12:48831317-48832002:-	Y	N	3.26829	6.88601e-20	8.34707e-18	0.318511	ENSG00000174243	DDX23
19:11446351-11447064:+	Y	Y	1.79439	6.93823e-20	8.40588e-18	0.064723	ENSG00000130175	PRKCSH
17:21011040-21011150:-	N	N	2.4707	7.02139e-20	8.5021e-18	0.107287	ENSG00000124422	USP22
4:145146430-145150512:-	Y	Y	4.27834	7.11691e-20	8.61317e-18	0.608912	ENSG00000164164	OTUD4
7:24820239-24830767:-	Y	Y	3.72771	7.14707e-20	8.64506e-18	0.17143	ENSG00000070882	OSBPL3
19:7931189-7931381:-	Y	N	2.72677	7.15299e-20	8.64761e-18	0.37293	ENSG00000104980	TIMM44
20:37223974-37225687:+	Y	Y	2.40539	7.27385e-20	8.78905e-18	0.0398373	ENSG00000118705	RPN2
11:68064632-68065785:-	Y	Y	3.02458	7.29885e-20	8.81456e-18	0.0873464	ENSG00000110721	CHKA
5:181239287-181239322:-	Y	N	2.62449	7.34217e-20	8.86217e-18	0.0737588	ENSG00000204628	RACK1
9:133351072-133351261:+	Y	Y	2.03872	7.51072e-20	9.06079e-18	0.0232019	ENSG00000148303	RPL7A
2:27336768-27337243:-	Y	Y	2.87152	7.66266e-20	9.23918e-18	0.159652	ENSG00000115207	GTF3C2
1:220107152-220110785:+	Y	Y	2.42686	7.73863e-20	9.32583e-18	0.0280258	ENSG00000067704	IARS2
19:18924283-18924308:+	Y	N	-14.686	7.82592e-20	9.42601e-18	-0.0937293	ENSG00000105671	DDX49
14:52711525-52713880:+	Y	Y	2.38331	7.86849e-20	9.47227e-18	0.0789028	ENSG00000100519	PSMC6
2:9554730-9555508:-	Y	Y	2.80669	8.14594e-20	9.80107e-18	0.167702	ENSG00000151694	ADAM17
8:9011753-9016321:+	Y	Y	3.42035	8.29979e-20	9.9809e-18	0.229289	ENSG00000104626	ERI1
1:19257712-19257832:+	Y	N	3.05071	8.4431e-20	1.01479e-17	0.136237	ENSG00000053372	MRTO4
21:43752630-43753582:+	Y	Y	4.33579	8.48213e-20	1.01894e-17	0.112974	ENSG00000160209	PDXK
14:50130763-50133807:-	Y	Y	4.53256	8.57834e-20	1.02995e-17	0.38634	ENSG00000100485	SOS2
1:156130774-156134402:+	Y	Y	2.30438	8.62462e-20	1.03496e-17	0.0272488	ENSG00000160789	LMNA
17:57675127-57676986:+	Y	Y	1.33062	8.65275e-20	1.03779e-17	0.0489331	ENSG00000153944	MSI2
3:133038436-133041785:+	Y	Y	-3.11855	9.03162e-20	1.08265e-17	-0.0109843	ENSG00000144868	TMEM108
10:97371082-97371760:-	Y	N	2.59489	9.07005e-20	1.08669e-17	0.193425	ENSG00000052749	RRP12
15:60393441-60394573:-	Y	Y	2.65435	9.07628e-20	1.08686e-17	0.014902	ENSG00000182718	ANXA2
15:44560576-44561017:+	Y	Y	2.55479	9.08469e-20	1.08729e-17	0.124041	ENSG00000104131	EIF3J
14:73729177-73729639:-	Y	Y	3.47842	9.10661e-20	1.08934e-17	0.372695	ENSG00000156030	MIDEAS
7:120951236-120953303:+	Y	Y	3.56575	9.19089e-20	1.09885e-17	0.291443	ENSG00000071243	ING3
15:41470393-41471171:+	Y	Y	3.81353	9.29831e-20	1.1111e-17	0.256068	ENSG00000137815	RTF1
1:156129827-156129908:+	Y	N	3.62231	9.36784e-20	1.11882e-17	0.23262	ENSG00000160789	LMNA
6:4021467-4031558:+	Y	Y	4.24766	9.57803e-20	1.14333e-17	0.624853	ENSG00000112739	PRPF4B
7:129865066-129879567:-	Y	Y	2.13752	9.8168e-20	1.17121e-17	0.0420645	ENSG00000186591	UBE2H
16:46620466-46620900:-	Y	N	4.88625	9.83885e-20	1.17323e-17	0.680474	ENSG00000171241	SHCBP1
14:59338415-59340073:+	Y	Y	4.09242	1.01561e-19	1.21042e-17	0.304231	ENSG00000100592	DAAM1
2:190927731-190930436:+	Y	Y	3.03673	1.03186e-19	1.22914e-17	0.0697187	ENSG00000115419	GLS
22:20090856-20091434:+	N	N	3.77476	1.03301e-19	1.22987e-17	0.561143	ENSG00000128191	DGCR8
1:162798936-162799503:+	Y	N	3.46017	1.04177e-19	1.23964e-17	0.428738	ENSG00000132196	HSD17B7
7:107929793-107931216:-	Y	Y	-3.82479	1.05385e-19	1.25336e-17	-0.0152983	ENSG00000091136	LAMB1
8:9710410-9720373:+	Y	Y	2.14917	1.07042e-19	1.27241e-17	0.0517617	ENSG00000173273	TNKS
11:74595503-74604562:+	Y	Y	3.29989	1.07417e-19	1.27619e-17	0.311951	ENSG00000077514	POLD3
18:22977790-22977887:+	Y	N	4.34086	1.08104e-19	1.28368e-17	0.55145	ENSG00000101773	RBBP8
6:87529649-87530783:-	Y	Y	2.95906	1.08587e-19	1.28874e-17	0.0811582	ENSG00000146282	RARS2
17:75809970-75812111:+	Y	Y	2.49805	1.0904e-19	1.29345e-17	0.124908	ENSG00000132478	UNK
1:42182025-42188736:-	Y	Y	4.11755	1.09271e-19	1.29551e-17	0.398239	ENSG00000198815	FOXJ3
12:53452844-53452975:+	Y	N	2.49665	1.09363e-19	1.29592e-17	0.117334	ENSG00000197111	PCBP2
17:76558791-76558868:+	Y	Y	3.4802	1.10313e-19	1.3065e-17	0.279029	ENSG00000163597	SNHG16
7:56059011-56059543:+	Y	Y	2.53733	1.1199e-19	1.32567e-17	0.20235	ENSG00000146731	CCT6A
17:63805994-63806151:+	Y	N	3.21927	1.12154e-19	1.32692e-17	0.487396	ENSG00000198231	DDX42
4:13597169-13598945:-	Y	Y	3.37275	1.12762e-19	1.33342e-17	0.357789	ENSG00000038219	BOD1L1
2:135840952-135844544:-	Y	Y	2.67951	1.12909e-19	1.33446e-17	0.0719956	ENSG00000076003	MCM6
17:44081597-44082583:-	Y	N	3.6176	1.13632e-19	1.3423e-17	0.193139	ENSG00000108840	HDAC5
12:110282796-110292019:+	Y	Y	2.22746	1.1468e-19	1.35398e-17	0.0261271	ENSG00000174437	ATP2A2
3:69042913-69043749:-	Y	Y	5.41479	1.1487e-19	1.35552e-17	0.565425	ENSG00000144747	TMF1
10:78038105-78038555:+	Y	N	1.97485	1.16024e-19	1.36842e-17	0.0587872	ENSG00000138326	RPS24
2:240788509-240789235:-	Y	Y	2.89875	1.17802e-19	1.38868e-17	0.055409	ENSG00000130294	KIF1A
15:63678366-63680076:-	Y	Y	4.89925	1.22046e-19	1.43796e-17	0.59626	ENSG00000103657	HERC1
18:56608279-56610992:-	Y	N	2.33168	1.23547e-19	1.45488e-17	0.0491592	ENSG00000091164	TXNL1
15:77464824-77467094:+	Y	Y	3.67327	1.23787e-19	1.45696e-17	0.129653	ENSG00000140382	HMG20A
12:26957972-26960514:+	Y	Y	2.87337	1.27775e-19	1.50311e-17	0.255822	ENSG00000111790	FGFR1OP2
16:30082535-30082745:+	Y	Y	2.65159	1.28162e-19	1.50689e-17	0.151492	ENSG00000149923	PPP4C
8:58553304-58560283:+	Y	Y	2.40115	1.29085e-19	1.51696e-17	0.037792	ENSG00000137575	SDCBP
6:75621626-75621926:+	Y	Y	3.83817	1.30804e-19	1.53636e-17	0.362519	ENSG00000112701	SENP6
19:14409985-14410215:-	Y	N	2.20504	1.31498e-19	1.54371e-17	0.267007	ENSG00000123136	DDX39A
2:32766550-32777881:+	Y	Y	4.21451	1.34805e-19	1.58172e-17	0.174003	ENSG00000018699	TTC27
5:79402056-79439009:-	Y	Y	2.91512	1.35555e-19	1.5897e-17	0.0836288	ENSG00000152413	HOMER1
5:181241916-181242169:-	Y	N	1.80594	1.36003e-19	1.59413e-17	0.107662	ENSG00000204628	RACK1
9:4703209-4706010:+	Y	Y	5.63032	1.38213e-19	1.61919e-17	0.683847	ENSG00000106993	CDC37L1
5:69117397-69118371:+	Y	Y	3.9452	1.38446e-19	1.62109e-17	0.190374	ENSG00000145740	SLC30A5
11:93148845-93153963:-	Y	Y	2.28126	1.39471e-19	1.63225e-17	0.0610389	ENSG00000180773	SLC36A4
5:43307825-43313021:-	Y	Y	2.92403	1.41474e-19	1.65484e-17	0.135494	ENSG00000112972	HMGCS1
19:54154456-54155257:+	Y	N	2.37985	1.41603e-19	1.65549e-17	0.208351	ENSG00000088038	CNOT3
19:5589021-5590277:-	Y	Y	3.206	1.41785e-19	1.65677e-17	0.344646	ENSG00000130254	SAFB2
17:81860116-81860194:-	Y	N	2.23452	1.42868e-19	1.66856e-17	0.257389	ENSG00000185624	P4HB
17:82096453-82096786:-	Y	Y	1.93424	1.43229e-19	1.67192e-17	0.190372	ENSG00000169710	FASN
20:495803-496728:-	Y	N	2.62205	1.44819e-19	1.68961e-17	0.0898735	ENSG00000101266	CSNK2A1
22:35286882-35287346:+	Y	N	4.74086	1.46007e-19	1.70259e-17	0.480408	ENSG00000100281	HMGXB4
3:196066331-196067517:-	Y	Y	3.18734	1.46916e-19	1.71232e-17	0.100511	ENSG00000072274	TFRC
8:61503510-61517012:-	Y	Y	4.58652	1.48031e-19	1.72443e-17	0.355438	ENSG00000198363	ASPH
22:38492116-38493360:-	Y	Y	2.09926	1.52314e-19	1.77341e-17	0.077242	ENSG00000100201	DDX17
10:78035721-78035837:+	Y	N	2.80142	1.53347e-19	1.78452e-17	0.0235673	ENSG00000138326	RPS24
16:74463480-74465675:-	Y	Y	3.23669	1.54133e-19	1.79275e-17	0.180823	ENSG00000090863	GLG1
1:45633832-45634095:-	Y	Y	3.12513	1.56546e-19	1.81988e-17	0.170117	ENSG00000159592	GPBP1L1
8:144443322-144443881:-	Y	Y	3.16049	1.58081e-19	1.83679e-17	0.319679	ENSG00000160949	TONSL
7:100030376-100030850:+	N	N	2.08938	1.58746e-19	1.84357e-17	0.306041	ENSG00000106261	ZKSCAN1
16:87392468-87393319:+	Y	N	4.45277	1.5962e-19	1.85278e-17	0.0664736	ENSG00000140941	MAP1LC3B
2:86561942-86563092:-	Y	Y	2.97802	1.59873e-19	1.85476e-17	0.23372	ENSG00000115561	CHMP3
22:32408834-32412063:-	Y	Y	2.4307	1.61666e-19	1.87461e-17	0.0705593	ENSG00000100220	RTCB
17:37125795-37129364:-	Y	Y	3.22995	1.61918e-19	1.87657e-17	0.0799271	ENSG00000278540	ACACA
1:179110596-179110804:-	Y	N	6.18228	1.63334e-19	1.89202e-17	0.751564	ENSG00000143322	ABL2
1:70274819-70276764:-	Y	Y	4.82761	1.63475e-19	1.89268e-17	0.541811	ENSG00000118454	ANKRD13C
14:73114334-73119712:+	Y	Y	1.90323	1.66074e-19	1.9218e-17	0.0164935	ENSG00000119707	RBM25
17:64487475-64488842:-	Y	Y	4.27598	1.66161e-19	1.92182e-17	0.623432	ENSG00000256525	POLG2
10:106579475-106597350:-	Y	Y	2.35589	1.67894e-19	1.94087e-17	0.0588225	ENSG00000108018	SORCS1
11:45902062-45902371:+	Y	Y	2.24858	1.71914e-19	1.98633e-17	0.236011	ENSG00000121653	MAPK8IP1
11:72024071-72024273:-	Y	N	3.63938	1.72328e-19	1.99011e-17	0.260864	ENSG00000137497	NUMA1
1:182387293-182387741:-	Y	Y	3.257	1.79687e-19	2.07403e-17	0.0897916	ENSG00000135821	GLUL
17:76558869-76558944:+	Y	N	3.67996	1.81002e-19	2.08815e-17	0.27119	ENSG00000163597	SNHG16
8:119819509-119831676:-	Y	Y	3.15273	1.84207e-19	2.12404e-17	0.272582	ENSG00000064313	TAF2
18:56605273-56608278:-	Y	Y	2.50063	1.84745e-19	2.12917e-17	0.0645884	ENSG00000091164	TXNL1
19:18924233-18924282:+	Y	N	-15.6693	1.85865e-19	2.141e-17	-0.0704945	ENSG00000105671	DDX49
8:109336205-109336588:+	Y	N	3.44446	1.87725e-19	2.16132e-17	0.197098	ENSG00000120533	ENY2
4:67511026-67512049:-	Y	Y	3.75851	1.90701e-19	2.19448e-17	0.518403	ENSG00000145241	CENPC
19:18926378-18927243:+	Y	Y	3.03186	1.93291e-19	2.22315e-17	0.126882	ENSG00000105671	DDX49
6:31532912-31534485:-	Y	N	1.75355	1.98228e-19	2.27763e-17	0.279722	ENSG00000198563	DDX39B
6:99410993-99411735:-	Y	Y	2.44654	1.98182e-19	2.27763e-17	0.349526	ENSG00000132424	PNISR
1:8015693-8026157:-	Y	Y	4.20941	2.01316e-19	2.31194e-17	0.364301	ENSG00000116285	ERRFI1
1:32393601-32394079:-	Y	N	2.71893	2.02795e-19	2.32774e-17	0.187709	ENSG00000160058	BSDC1
10:97372167-97372735:-	Y	Y	2.97611	2.07966e-19	2.38589e-17	0.245433	ENSG00000052749	RRP12
22:41512288-41515376:+	Y	Y	2.49761	2.0904e-19	2.39701e-17	0.021352	ENSG00000100412	ACO2
15:60390318-60391022:-	Y	Y	3.39694	2.10426e-19	2.41167e-17	0.0131509	ENSG00000182718	ANXA2
12:71918498-71918548:+	Y	N	-6.90899	2.10864e-19	2.41548e-17	-0.301816	ENSG00000121749	TBC1D15
3:37245422-37249700:+	Y	Y	2.6754	2.1303e-19	2.43906e-17	0.124485	ENSG00000144674	GOLGA4
1:154978115-154978684:+	Y	N	2.85462	2.15374e-19	2.46465e-17	0.0321694	ENSG00000173207	CKS1B
11:32595014-32595965:+	Y	Y	2.26613	2.16743e-19	2.47907e-17	0.0508931	ENSG00000149100	EIF3M
1:114720738-114723882:-	Y	Y	2.81092	2.20765e-19	2.5238e-17	0.0584802	ENSG00000009307	CSDE1
14:88638908-88642892:-	Y	Y	2.78495	2.23903e-19	2.55838e-17	0.239686	ENSG00000165521	EML5
5:179620038-179620674:-	Y	Y	1.65776	2.31681e-19	2.64594e-17	0.248376	ENSG00000169045	HNRNPH1
5:37325968-37327628:-	Y	Y	2.93024	2.32919e-19	2.65873e-17	0.197155	ENSG00000113569	NUP155
1:52481924-52488908:-	Y	Y	2.7726	2.38039e-19	2.71581e-17	0.12661	ENSG00000134744	TUT4
4:73149051-73151429:-	Y	Y	2.70719	2.39649e-19	2.73281e-17	0.11023	ENSG00000132466	ANKRD17
2:96281185-96281813:-	Y	N	2.59954	2.40977e-19	2.74657e-17	0.0683024	ENSG00000144028	SNRNP200
3:23917533-23917665:+	Y	N	3.41244	2.41486e-19	2.75099e-17	0.0786962	ENSG00000174748	RPL15
7:6121491-6122200:+	N	N	2.97045	2.47562e-19	2.81879e-17	0.263989	ENSG00000106346	USP42
9:33276565-33277792:+	Y	Y	2.19547	2.48136e-19	2.82391e-17	0.0456204	ENSG00000086065	CHMP5
7:151477416-151484736:-	Y	Y	1.96885	2.51802e-19	2.8642e-17	0.0166983	ENSG00000106615	RHEB
20:21386277-21386414:+	N	N	3.21737	2.56727e-19	2.91875e-17	0.251599	ENSG00000088930	XRN2
2:231062694-231066905:+	Y	Y	2.21431	2.60368e-19	2.95867e-17	0.0558501	ENSG00000173692	PSMD1
3:52662277-52668497:-	Y	Y	2.52051	2.61053e-19	2.96497e-17	0.0330041	ENSG00000163939	PBRM1
[truncated: 61,760 more rows]

## Sheet: NV2 competition vs. B1-PAL DSGs
coorsID	annotated	isIntron	altsplice_log2fc	altsplice_pvalue	altsplice_padj	altsplice_delta_psi	gene_id	gene_name		DSGs = differentially spliced genes
2:43947731-43947775:-	Y	N	-6.02484	5.46121e-37	1.22912e-31	-0.211355	ENSG00000138095	LRPPRC
7:98186999-98190727:+	Y	Y	3.51654	5.04251e-36	5.67441e-31	0.223679	ENSG00000164715	LMTK2
2:229773561-229774096:-	Y	N	2.63724	5.61375e-34	4.21149e-29	0.102979	ENSG00000153827	TRIP12
2:229771633-229773560:-	Y	Y	2.15701	9.76673e-30	5.49532e-25	0.0515637	ENSG00000153827	TRIP12
9:132288550-132288651:-	Y	N	-16.8401	4.40561e-28	1.98308e-23	-0.311118	ENSG00000107290	SETX
20:35716806-35721739:-	Y	Y	1.78285	8.02954e-25	3.01192e-20	0.0198404	ENSG00000131051	RBM39
3:169988360-169992593:+	Y	Y	3.34223	1.33857e-24	4.30375e-20	0.109372	ENSG00000008952	SEC62
1:154263506-154266451:+	Y	Y	1.82156	4.25917e-24	1.19823e-19	0.0591476	ENSG00000143569	UBAP2L
11:130123780-130126699:+	Y	Y	1.61904	5.09497e-24	1.2741e-19	0.0140673	ENSG00000084234	APLP2
8:18006398-18009546:+	Y	Y	2.08001	1.24874e-23	2.81046e-19	0.071875	ENSG00000078674	PCM1
1:154262203-154263102:+	Y	Y	2.0867	5.17992e-22	1.05983e-17	0.0652454	ENSG00000143569	UBAP2L
18:63338884-63340935:-	Y	Y	2.66664	1.81216e-21	3.39876e-17	0.0882309	ENSG00000119537	KDSR
3:51430213-51433105:-	Y	Y	3.03398	1.79588e-18	3.10912e-14	0.0746238	ENSG00000145041	DCAF1
1:239827379-239886088:+	Y	Y	-1.91453	1.50113e-17	2.4132e-13	-0.0225485	ENSG00000133019	CHRM3
2:135872844-135876258:-	Y	Y	1.99113	2.66999e-17	3.75572e-13	0.0457091	ENSG00000076003	MCM6
7:112336172-112337727:+	Y	Y	2.68444	2.64637e-17	3.75572e-13	0.0934997	ENSG00000198839	ZNF277
18:63341081-63344341:-	Y	Y	2.54306	3.94168e-17	5.2184e-13	0.0542476	ENSG00000119537	KDSR
11:19892595-19931764:+	Y	Y	-2.15389	4.87918e-17	6.10068e-13	-0.00968951	ENSG00000166833	NAV2
11:19984248-20022555:+	Y	Y	-2.47054	6.50459e-17	7.70496e-13	-0.0251458	ENSG00000166833	NAV2
14:100884875-100893443:-	Y	Y	-1.47261	7.21535e-17	7.8998e-13	-0.00286247	ENSG00000254656	RTL1
19:47153041-47155113:+	Y	Y	1.67302	7.37108e-17	7.8998e-13	0.00779529	ENSG00000142230	SAE1
6:57320561-57324200:+	Y	Y	2.72824	1.40346e-16	1.37333e-12	0.0498262	ENSG00000146143	PRIM2
19:39837051-39837710:-	Y	Y	2.00264	1.4012e-16	1.37333e-12	0.0141883	ENSG00000105202	FBL
1:244417753-244418759:-	Y	Y	2.61364	1.59926e-16	1.43973e-12	0.0339448	ENSG00000035687	ADSS2
11:20027702-20035958:+	Y	Y	-2.42488	1.5979e-16	1.43973e-12	-0.0163368	ENSG00000166833	NAV2
7:7595133-7596256:+	Y	Y	3.25996	1.81925e-16	1.5748e-12	0.193624	ENSG00000164654	MIOS
5:163517675-163518192:+	Y	N	2.66671	4.11023e-16	3.42615e-12	0.10882	ENSG00000038274	MAT2B
16:2449463-2449827:+	Y	Y	2.20863	5.4759e-16	4.40151e-12	0.100653	ENSG00000162063	CCNF
X:23667812-23671393:+	Y	Y	2.08799	7.1919e-16	5.58149e-12	0.00610412	ENSG00000123131	PRDX4
6:100509534-100509931:-	Y	Y	3.10492	1.26281e-15	9.47372e-12	0.246156	ENSG00000112249	ASCC3
9:4703209-4706010:+	Y	Y	4.53265	1.46001e-15	1.05998e-11	0.5714	ENSG00000106993	CDC37L1
1:37700522-37701753:+	Y	Y	1.96121	1.60453e-15	1.1285e-11	0.0597922	ENSG00000134690	CDCA8
5:179615596-179616125:-	Y	N	2.92128	2.73982e-15	1.85646e-11	0.19075	ENSG00000169045	HNRNPH1
11:66264445-66265022:+	Y	Y	2.44441	2.80453e-15	1.85646e-11	0.0804902	ENSG00000174996	KLC2
11:19934278-19939660:+	Y	Y	-1.98597	2.99823e-15	1.92798e-11	-0.0124629	ENSG00000166833	NAV2
1:53947862-53947981:+	Y	N	2.8513	5.17086e-15	3.23269e-11	0.42589	ENSG00000116212	LRRC42
1:32376742-32377969:-	Y	Y	2.37213	5.74162e-15	3.4925e-11	0.124428	ENSG00000160058	BSDC1
15:74185562-74189114:-	Y	Y	-1.68348	6.70741e-15	3.9726e-11	-0.0578715	ENSG00000137868	STRA6
1:37698978-37700435:+	Y	Y	2.19226	7.64541e-15	4.41205e-11	0.075613	ENSG00000134690	CDCA8
7:139265183-139265462:+	N	N	3.72869	4.67938e-14	2.63289e-10	0.202718	ENSG00000157741	UBN2
1:239719655-239787121:+	Y	Y	-1.72065	5.83544e-14	3.20327e-10	-0.0233915	ENSG00000133019	CHRM3
3:133381162-133386423:+	Y	Y	-2.11617	7.38646e-14	3.95814e-10	-0.0145744	ENSG00000144868	TMEM108
7:82067257-82084768:-	Y	Y	1.48854	9.63321e-14	5.04204e-10	0.029204	ENSG00000153956	CACNA2D1
16:58555909-58556846:-	Y	Y	2.05192	1.20231e-13	6.14991e-10	0.0654036	ENSG00000125107	CNOT1
2:8818794-8824058:-	Y	Y	2.18404	2.49051e-13	1.21853e-09	0.0178229	ENSG00000134313	KIDINS220
11:20097746-20100936:+	Y	Y	-2.10476	2.4689e-13	1.21853e-09	-0.0326393	ENSG00000166833	NAV2
18:63331902-63334922:-	Y	Y	2.10461	2.89513e-13	1.38635e-09	0.0320316	ENSG00000119537	KDSR
12:105115729-105118445:+	Y	Y	2.12242	3.79806e-13	1.78084e-09	0.163549	ENSG00000136051	WASHC4
20:63434731-63437352:-	Y	Y	-1.64832	4.16146e-13	1.91141e-09	-0.00668194	ENSG00000075043	KCNQ2
14:67653499-67656411:-	Y	Y	1.91729	5.44193e-13	2.44956e-09	0.00949373	ENSG00000100568	VTI1B
17:57627304-57631790:+	Y	N	-1.20442	5.59483e-13	2.469e-09	-0.00618496	ENSG00000153944	MSI2
7:81970675-81970737:-	Y	N	-13.9723	6.69769e-13	2.89885e-09	-0.0430867	ENSG00000153956	CACNA2D1
7:8143973-8156556:-	Y	Y	-1.2549	7.09622e-13	3.01339e-09	-0.0138223	ENSG00000003147	ICA1
20:62910021-62910773:-	Y	Y	2.5893	1.04368e-12	4.34989e-09	0.13781	ENSG00000101191	DIDO1
8:17993620-18006053:+	Y	Y	1.46083	1.38961e-12	5.68636e-09	0.0898142	ENSG00000078674	PCM1
9:4702029-4703085:+	Y	Y	3.86993	1.45822e-12	5.86055e-09	0.521824	ENSG00000106993	CDC37L1
1:239787178-239826073:+	Y	Y	-1.49499	1.78358e-12	6.92297e-09	-0.0136	ENSG00000133019	CHRM3
8:119758143-119760454:-	Y	Y	2.68688	1.80481e-12	6.92297e-09	0.108441	ENSG00000064313	TAF2
17:82094104-82094187:-	Y	N	1.58911	1.81485e-12	6.92297e-09	0.0904496	ENSG00000169710	FASN
20:5915498-5916325:+	Y	N	-1.47859	1.99971e-12	7.501e-09	-0.0187391	ENSG00000089199	CHGB
6:75713513-75713581:+	Y	N	-13.9203	2.13176e-12	7.86523e-09	-0.110301	ENSG00000112701	SENP6
14:77287013-77287209:-	Y	N	3.00275	2.6183e-12	9.50454e-09	0.214255	ENSG00000009830	POMT2
17:57633184-57650649:+	Y	Y	-1.18188	2.95679e-12	1.05629e-08	-0.00373979	ENSG00000153944	MSI2
11:20051334-20054079:+	Y	Y	-1.98293	3.08125e-12	1.08356e-08	-0.0169232	ENSG00000166833	NAV2
14:77287825-77288761:-	Y	Y	3.1483	3.98247e-12	1.37893e-08	0.10009	ENSG00000009830	POMT2
5:168518063-168519080:+	Y	Y	1.57809	4.42188e-12	1.50788e-08	0.0462116	ENSG00000113643	RARS1
8:28784001-28787828:-	Y	Y	2.46727	4.6408e-12	1.53599e-08	0.0768461	ENSG00000104299	INTS9
17:57596951-57615969:+	Y	Y	-1.04643	4.58021e-12	1.53599e-08	-0.00545296	ENSG00000153944	MSI2
17:76348582-76353060:-	Y	Y	2.30016	5.77999e-12	1.88531e-08	0.0322954	ENSG00000161542	PRPSAP1
14:77287580-77287824:-	Y	N	3.21251	6.24007e-12	1.97804e-08	0.140967	ENSG00000009830	POMT2
17:63666651-63666939:+	N	N	2.59981	6.23596e-12	1.97804e-08	0.375946	ENSG00000198909	MAP3K3
3:133386424-133389683:+	Y	N	-2.17764	6.51643e-12	2.03695e-08	-0.0177667	ENSG00000144868	TMEM108
17:82094188-82095319:-	Y	Y	0.944443	8.39136e-12	2.5871e-08	0.0267913	ENSG00000169710	FASN
17:66645512-66687110:+	Y	Y	-1.95346	1.44721e-11	4.40154e-08	-0.00681856	ENSG00000154229	PRKCA
3:133303338-133378341:+	Y	Y	-1.7555	1.61662e-11	4.85121e-08	-0.00799127	ENSG00000144868	TMEM108
1:239703650-239718795:+	Y	Y	-1.67865	1.69565e-11	5.02141e-08	-0.0293451	ENSG00000133019	CHRM3
3:77546463-77550817:+	Y	Y	-2.28003	2.13208e-11	6.23185e-08	-0.0126969	ENSG00000185008	ROBO2
11:20083180-20090864:+	Y	Y	-2.45303	3.38007e-11	9.75293e-08	-0.0125028	ENSG00000166833	NAV2
1:154262173-154262202:+	N	N	2.29073	3.84635e-11	1.09579e-07	0.138902	ENSG00000143569	UBAP2L
7:50504060-50527668:-	Y	Y	-1.4808	4.46783e-11	1.24708e-07	-0.00477238	ENSG00000132437	DDC
14:92926699-92927549:+	Y	Y	-0.906814	4.48824e-11	1.24708e-07	-0.00647642	ENSG00000100604	CHGA
1:53809747-53818969:-	Y	Y	1.40643	4.93533e-11	1.35458e-07	0.016201	ENSG00000058804	NDC1
11:19842924-19868924:+	Y	Y	-1.55258	5.10169e-11	1.38337e-07	-0.00799573	ENSG00000166833	NAV2
1:239678289-239703197:+	Y	Y	-1.76966	5.38624e-11	1.42617e-07	-0.0343417	ENSG00000133019	CHRM3
5:115130890-115133859:-	Y	Y	2.58897	5.35634e-11	1.42617e-07	0.132357	ENSG00000152503	TRIM36
11:32589642-32593768:+	Y	Y	1.26462	5.70386e-11	1.49271e-07	0.0124515	ENSG00000149100	EIF3M
11:20068399-20077551:+	Y	Y	-1.78804	6.00103e-11	1.55243e-07	-0.0132515	ENSG00000166833	NAV2
8:28780995-28783584:-	Y	Y	2.26796	6.65728e-11	1.68349e-07	0.0767735	ENSG00000104299	INTS9
11:19832602-19842590:+	Y	Y	-1.80381	6.63443e-11	1.68349e-07	-0.0119441	ENSG00000166833	NAV2
17:44351164-44351300:+	Y	N	3.00177	6.86028e-11	1.71481e-07	0.0830619	ENSG00000030582	GRN
17:82093772-82094103:-	Y	Y	1.19941	6.9335e-11	1.71481e-07	0.0554532	ENSG00000169710	FASN
9:129828442-129829204:-	Y	N	2.70375	7.13373e-11	1.74515e-07	0.06683	ENSG00000136819	C9orf78
3:184166702-184166825:+	Y	Y	2.09084	7.31935e-11	1.77131e-07	0.131026	ENSG00000161202	DVL3
3:77595185-77596622:+	Y	Y	-2.76728	7.5306e-11	1.80304e-07	-0.0208635	ENSG00000185008	ROBO2
15:74185056-74185310:-	Y	Y	-2.21713	7.85347e-11	1.86055e-07	-0.107216	ENSG00000137868	STRA6
19:46728407-46728617:-	Y	Y	2.80906	8.42891e-11	1.97608e-07	0.0685423	ENSG00000090372	STRN4
19:49098705-49101389:+	Y	Y	1.35222	1.06168e-10	2.46336e-07	0.0380862	ENSG00000104852	SNRNP70
7:50499243-50503992:-	Y	Y	-1.49155	1.10473e-10	2.53708e-07	-0.0136571	ENSG00000132437	DDC
21:46195757-46196201:-	Y	Y	2.00402	1.17997e-10	2.6825e-07	0.0540681	ENSG00000160285	LSS
11:77616696-77618532:-	Y	Y	1.11554	1.45302e-10	3.2702e-07	0.0569833	ENSG00000074201	CLNS1A
10:110894412-110894522:+	Y	N	-4.36695	1.67853e-10	3.74035e-07	-0.104962	ENSG00000150593	PDCD4
8:28783585-28784000:-	Y	N	3.10824	1.91832e-10	4.23277e-07	0.148163	ENSG00000104299	INTS9
12:2859664-2861298:-	Y	Y	1.63993	1.94288e-10	4.24535e-07	0.0458953	ENSG00000111206	FOXM1
3:149060859-149063430:-	Y	Y	2.42728	2.14653e-10	4.64524e-07	0.0994057	ENSG00000071794	HLTF
11:20114796-20118132:+	Y	Y	-2.10584	2.71139e-10	5.81176e-07	-0.0129633	ENSG00000166833	NAV2
2:165880800-165883789:-	Y	Y	2.76288	2.78762e-10	5.86347e-07	0.10592	ENSG00000123607	TTC21B
8:125056818-125057555:-	Y	Y	2.38991	2.78338e-10	5.86347e-07	0.116207	ENSG00000164961	WASHC5
14:100893506-100903290:-	Y	Y	-1.17996	2.89561e-10	6.0342e-07	-0.00439969	ENSG00000254656	RTL1
10:31809230-31809307:-	Y	N	-4.43764	3.27689e-10	6.73244e-07	-0.330663	ENSG00000165322	ARHGAP12
11:19868998-19879868:+	Y	Y	-1.73579	3.2905e-10	6.73244e-07	-0.0228491	ENSG00000166833	NAV2
1:150444378-150446225:+	Y	Y	1.76259	3.39537e-10	6.88443e-07	0.0304711	ENSG00000163125	RPRD2
21:46196372-46205835:-	Y	Y	1.63446	3.5793e-10	7.19257e-07	0.0409064	ENSG00000160285	LSS
11:20095768-20097576:+	Y	Y	-2.03073	3.69546e-10	7.36027e-07	-0.0132964	ENSG00000166833	NAV2
14:77304801-77305744:-	Y	N	1.60441	3.82983e-10	7.56099e-07	0.0857437	ENSG00000009830	POMT2
14:100546663-100548053:-	Y	N	-1.82916	4.52203e-10	8.84993e-07	-0.158332	ENSG00000183092	BEGAIN
13:45486576-45490914:+	Y	Y	2.5313	5.19119e-10	1.00719e-06	0.112404	ENSG00000136152	COG3
14:77287233-77287271:-	Y	N	3.09348	5.30985e-10	1.02141e-06	0.249659	ENSG00000009830	POMT2
14:21426243-21427868:-	Y	N	2.13248	5.76983e-10	1.10049e-06	0.0657133	ENSG00000100888	CHD8
11:19939774-19946400:+	Y	Y	-2.25538	6.08678e-10	1.15118e-06	-0.0251756	ENSG00000166833	NAV2
1:186386084-186388441:+	Y	Y	1.77228	6.34159e-10	1.18938e-06	0.0845061	ENSG00000157181	ODR4
4:39862219-39862333:-	Y	N	-13.5208	6.89874e-10	1.28318e-06	-0.0516865	ENSG00000121892	PDS5A
7:84195446-84295041:-	Y	Y	-1.83538	9.10696e-10	1.68003e-06	-0.0203635	ENSG00000075213	SEMA3A
17:2389266-2391402:-	Y	N	-1.65563	1.04761e-09	1.9169e-06	-0.0559911	ENSG00000070444	MNT
7:143384246-143387761:+	Y	Y	-1.84009	1.09184e-09	1.98171e-06	-0.0106023	ENSG00000159840	ZYX
11:113214512-113221295:+	Y	Y	-1.38164	1.17618e-09	2.11772e-06	-0.0247112	ENSG00000149294	NCAM1
7:150960877-150974710:-	Y	Y	-1.73131	1.40766e-09	2.51438e-06	-0.0261519	ENSG00000055118	KCNH2
15:78607525-78617023:-	Y	Y	-1.08459	1.42847e-09	2.53147e-06	-0.0043677	ENSG00000080644	CHRNA3
14:100548099-100549889:-	Y	N	-1.79524	1.51719e-09	2.66769e-06	-0.155995	ENSG00000183092	BEGAIN
15:78602265-78607440:-	Y	Y	-1.14382	1.5629e-09	2.72674e-06	-0.00561859	ENSG00000080644	CHRNA3
14:92929816-92931249:+	Y	Y	-1.17314	1.62322e-09	2.81021e-06	-0.00541256	ENSG00000100604	CHGA
3:77493383-77522774:+	Y	Y	-1.98871	1.69768e-09	2.91668e-06	-0.0166541	ENSG00000185008	ROBO2
3:77596751-77602209:+	Y	Y	-2.24141	1.85834e-09	3.12122e-06	-0.00989986	ENSG00000185008	ROBO2
4:2625462-2625544:+	Y	N	4.67944	1.85758e-09	3.12122e-06	0.244642	ENSG00000125386	FAM193A
17:64503099-64503187:-	Y	N	1.80476	1.84579e-09	3.12122e-06	0.0587696	ENSG00000108654	DDX5
15:78618916-78619278:-	Y	N	-1.30452	1.9148e-09	3.19222e-06	-0.105006	ENSG00000080644	CHRNA3
9:4703086-4703208:+	Y	N	4.17946	1.97898e-09	3.27496e-06	0.608685	ENSG00000106993	CDC37L1
13:45492251-45493346:+	Y	Y	2.51106	2.15271e-09	3.53646e-06	0.189367	ENSG00000136152	COG3
1:154266452-154266500:+	Y	N	2.23953	2.35038e-09	3.83321e-06	0.167227	ENSG00000143569	UBAP2L
6:87545700-87547633:-	Y	Y	1.41232	2.49103e-09	4.03337e-06	0.0745975	ENSG00000146282	RARS2
11:20036098-20043980:+	Y	Y	-1.82895	2.53935e-09	4.08224e-06	-0.0114097	ENSG00000166833	NAV2
11:19949081-19984124:+	Y	Y	-2.07391	2.8217e-09	4.50397e-06	-0.0103462	ENSG00000166833	NAV2
17:19385455-19386309:-	Y	Y	-1.36919	2.92142e-09	4.6303e-06	-0.0161402	ENSG00000166482	MFAP4
3:69024055-69024180:-	Y	N	-13.8469	3.14616e-09	4.95163e-06	-0.355621	ENSG00000144747	TMF1
3:133229352-133303203:+	Y	Y	-1.56896	3.38983e-09	5.2981e-06	-0.0182789	ENSG00000144868	TMEM108
6:166440346-166448723:-	Y	Y	-1.66822	3.52638e-09	5.43602e-06	-0.0190195	ENSG00000071242	RPS6KA2
14:51878045-51913008:+	Y	Y	-1.3749	3.52517e-09	5.43602e-06	-0.00803744	ENSG00000186469	GNG2
9:133653000-133655657:+	Y	Y	-0.753497	3.60327e-09	5.51675e-06	-0.00383067	ENSG00000123454	DBH
14:100550510-100567910:-	Y	Y	-1.69955	3.92162e-09	5.9636e-06	-0.136194	ENSG00000183092	BEGAIN
3:12141997-12145678:+	Y	Y	-2.29949	4.03865e-09	6.10034e-06	-0.028445	ENSG00000157152	SYN2
2:85636131-85637368:+	Y	Y	1.78013	4.11674e-09	6.17684e-06	0.0300543	ENSG00000168883	USP39
22:28773779-28780947:+	Y	Y	1.68071	4.23187e-09	6.30754e-06	0.0367962	ENSG00000159873	CCDC117
1:100125943-100132749:-	Y	Y	1.63637	4.29183e-09	6.35482e-06	0.0690514	ENSG00000156876	SASS6
11:103235814-103236429:+	Y	Y	3.25128	4.36002e-09	6.41359e-06	0.323591	ENSG00000187240	DYNC2H1
7:139265463-139266332:+	Y	Y	1.98072	4.45809e-09	6.51527e-06	0.0776103	ENSG00000157741	UBN2
9:127642564-127651602:+	Y	Y	1.319	5.29325e-09	7.6859e-06	0.0118084	ENSG00000136854	STXBP1
4:7789021-7793680:-	Y	Y	-1.57082	5.61205e-09	8.09657e-06	-0.00759295	ENSG00000196526	AFAP1
5:79641455-79641517:+	N	N	3.03818	6.03339e-09	8.649e-06	0.447251	ENSG00000164329	TENT2
3:77481220-77493243:+	Y	Y	-1.74994	6.08454e-09	8.66712e-06	-0.00712424	ENSG00000185008	ROBO2
14:51914275-51939780:+	Y	Y	-1.42532	6.23729e-09	8.82883e-06	-0.00390082	ENSG00000186469	GNG2
11:77618533-77618687:-	Y	N	1.24328	6.87481e-09	9.67041e-06	0.128474	ENSG00000074201	CLNS1A
2:26941357-26941949:+	N	N	1.34494	7.21999e-09	1.00929e-05	0.0366423	ENSG00000157851	DPYSL5
X:45106542-45106649:+	Y	N	3.98708	9.42483e-09	1.30937e-05	0.587453	ENSG00000147050	KDM6A
1:28518958-28529857:+	Y	Y	1.24314	9.53879e-09	1.31707e-05	0.0265397	ENSG00000180198	RCC1
7:81965666-81967164:-	Y	Y	-1.76383	1.0138e-08	1.39127e-05	-0.0276439	ENSG00000153956	CACNA2D1
3:130956180-130959274:+	Y	Y	1.50225	1.10932e-08	1.50835e-05	0.0278871	ENSG00000017260	ATP2C1
12:98544951-98545061:+	Y	N	1.37423	1.11251e-08	1.50835e-05	0.161028	ENSG00000120802	TMPO
7:37096728-37133005:-	Y	Y	-2.72039	1.18086e-08	1.59142e-05	-0.0158087	ENSG00000155849	ELMO1
11:19777983-19813717:+	Y	Y	-1.66838	1.18832e-08	1.59194e-05	-0.0124421	ENSG00000166833	NAV2
16:85648752-85654277:+	Y	Y	-1.62973	1.28322e-08	1.7089e-05	-0.0293192	ENSG00000131149	GSE1
19:46728127-46728299:-	Y	N	3.19425	1.29817e-08	1.71864e-05	0.0741316	ENSG00000090372	STRN4
12:98544230-98544349:+	Y	N	1.32329	1.31399e-08	1.72942e-05	0.195835	ENSG00000120802	TMPO
10:102144250-102144307:+	Y	N	-4.98377	1.34087e-08	1.75453e-05	-0.0904568	ENSG00000148840	PPRC1
2:219480698-219481303:+	N	N	-6.58592	1.41366e-08	1.83397e-05	-0.81909	ENSG00000072195	SPEG
8:61503510-61517012:-	Y	Y	2.31121	1.42602e-08	1.83397e-05	0.0901032	ENSG00000198363	ASPH
18:63334923-63335099:-	N	N	2.76966	1.41934e-08	1.83397e-05	0.132453	ENSG00000119537	KDSR
5:178620674-178621808:-	Y	Y	-3.14411	1.44814e-08	1.85183e-05	-0.240882	ENSG00000113240	CLK4
10:106776693-106829573:-	Y	Y	-1.36321	1.6527e-08	2.10147e-05	-0.00459988	ENSG00000108018	SORCS1
5:43291221-43292473:-	Y	Y	1.34896	1.79385e-08	2.26814e-05	0.0490984	ENSG00000112972	HMGCS1
8:65719496-65721797:-	Y	Y	1.42266	1.89078e-08	2.37734e-05	0.107553	ENSG00000205268	PDE7A
15:34145492-34145855:-	Y	N	1.4949	1.97027e-08	2.46353e-05	0.112337	ENSG00000134152	KATNBL1
2:209710813-209723594:+	Y	Y	-1.26948	1.98838e-08	2.47244e-05	-0.00596664	ENSG00000078018	MAP2
16:88657583-88657713:-	Y	N	1.86817	2.17765e-08	2.69291e-05	0.257331	ENSG00000167508	MVD
11:19713963-19777801:+	Y	Y	-1.41305	2.44979e-08	3.01288e-05	-0.0217032	ENSG00000166833	NAV2
4:55416042-55416157:+	Y	N	1.77189	2.60401e-08	3.18514e-05	0.188761	ENSG00000134851	TMEM165
2:96298421-96298602:-	Y	Y	1.89286	2.67427e-08	3.25341e-05	0.0835038	ENSG00000144028	SNRNP200
4:7781628-7786193:-	Y	Y	-1.6269	2.75922e-08	3.33869e-05	-0.0268036	ENSG00000196526	AFAP1
17:82091685-82092454:-	Y	Y	0.930372	2.8241e-08	3.39893e-05	0.0339656	ENSG00000169710	FASN
3:128620594-128622163:-	Y	Y	1.52968	3.24747e-08	3.8808e-05	0.0176618	ENSG00000163902	RPN1
4:54048955-54049038:-	Y	N	-3.25836	3.25896e-08	3.8808e-05	-0.175942	ENSG00000109220	CHIC2
16:31182665-31183350:+	Y	N	-0.95425	3.32421e-08	3.93767e-05	-0.0164693	ENSG00000089280	FUS
1:204245727-204247364:-	Y	Y	-1.51545	3.75573e-08	4.40248e-05	-0.0405562	ENSG00000143850	PLEKHA6
19:4284905-4288191:+	Y	Y	-1.22853	3.74994e-08	4.40248e-05	-0.0105695	ENSG00000105251	SHD
6:73120578-73124485:+	Y	Y	-3.83536	3.78557e-08	4.41447e-05	-0.170889	ENSG00000185760	KCNQ5
11:19880128-19884293:+	Y	Y	-1.8972	3.90508e-08	4.53035e-05	-0.0235993	ENSG00000166833	NAV2
17:75001490-75001874:+	N	N	1.71046	4.02256e-08	4.64272e-05	0.0969997	ENSG00000109089	CDR2L
2:53923049-53923118:-	Y	N	-5.45625	4.14526e-08	4.73576e-05	-0.0502649	ENSG00000068878	PSME4
4:78526658-78534448:+	Y	Y	-2.82776	4.13036e-08	4.73576e-05	-0.0199432	ENSG00000138759	FRAS1
8:90006278-90015540:+	Y	Y	-1.86392	4.19476e-08	4.76811e-05	-0.0378745	ENSG00000104325	DECR1
7:2632279-2645531:+	Y	Y	-0.862026	4.29371e-08	4.85606e-05	-0.0093462	ENSG00000136295	TTYH3
9:121157750-121157880:+	Y	N	-13.4161	4.49928e-08	5.06311e-05	-0.262198	ENSG00000119397	CNTRL
16:88657735-88657914:-	Y	N	1.79383	4.57243e-08	5.11982e-05	0.229735	ENSG00000167508	MVD
12:44816137-44851669:-	Y	Y	-1.50194	4.82979e-08	5.38122e-05	-0.0018327	ENSG00000184613	NELL2
22:29564372-29569192:-	Y	Y	-1.21185	4.85459e-08	5.38221e-05	-0.00571558	ENSG00000184117	NIPSNAP1
7:5594897-5602871:+	Y	Y	-1.07829	5.01673e-08	5.5347e-05	-0.00171826	ENSG00000075618	FSCN1
10:77812378-77812773:-	N	N	2.69941	5.16582e-08	5.67139e-05	0.0973119	ENSG00000151208	DLG5
7:2590107-2593021:+	Y	Y	3.11245	5.47939e-08	5.92889e-05	0.212106	ENSG00000106012	IQCE
7:1495554-1496155:-	Y	Y	1.25987	5.47221e-08	5.92889e-05	0.0559161	ENSG00000164880	INTS1
19:5653421-5654060:+	Y	Y	2.33695	5.4447e-08	5.92889e-05	0.19263	ENSG00000160633	SAFB
1:19144908-19145792:-	Y	Y	1.71955	5.56171e-08	5.98917e-05	0.103802	ENSG00000127481	UBR4
3:77527415-77546337:+	Y	Y	-2.02494	5.7297e-08	6.11158e-05	-0.0179566	ENSG00000185008	ROBO2
22:46350464-46351649:+	Y	Y	1.60542	5.71672e-08	6.11158e-05	0.20497	ENSG00000100416	TRMU
4:2625545-2626409:+	Y	Y	2.08527	5.99579e-08	6.29151e-05	0.0688785	ENSG00000125386	FAM193A
15:78619279-78619736:-	Y	Y	-1.24973	6.01021e-08	6.29151e-05	-0.108989	ENSG00000080644	CHRNA3
17:75136251-75146665:-	Y	Y	-0.674548	5.92818e-08	6.29151e-05	-0.00520866	ENSG00000189159	JPT1
19:46728332-46728406:-	Y	N	3.90135	5.99851e-08	6.29151e-05	0.0809035	ENSG00000090372	STRN4
17:16344743-16348037:-	Y	Y	-0.8794	6.46991e-08	6.74137e-05	-0.00659521	ENSG00000166582	CENPV
14:77305861-77306245:-	Y	N	1.55979	6.50131e-08	6.74287e-05	0.131763	ENSG00000009830	POMT2
1:186383157-186385987:+	Y	Y	1.30156	6.72937e-08	6.9474e-05	0.0466515	ENSG00000157181	ODR4
7:120970881-120973204:+	Y	Y	1.83079	6.80609e-08	6.96272e-05	0.0893997	ENSG00000071243	ING3
8:65721798-65723540:-	Y	N	1.44115	6.80006e-08	6.96272e-05	0.106037	ENSG00000205268	PDE7A
7:11593503-11636129:-	Y	Y	-1.51712	7.07256e-08	7.20258e-05	-0.0155703	ENSG00000005108	THSD7A
2:127502873-127503386:-	Y	Y	2.74093	7.95161e-08	8.06132e-05	0.171574	ENSG00000163166	IWS1
18:46120061-46122466:+	Y	Y	1.35958	8.02317e-08	8.09739e-05	0.0174022	ENSG00000152240	HAUS1
15:58640961-58643885:-	Y	Y	1.41089	8.09992e-08	8.10435e-05	0.0132026	ENSG00000137845	ADAM10
18:63340936-63341080:-	N	N	3.36201	8.10208e-08	8.10435e-05	0.17282	ENSG00000119537	KDSR
8:52634969-52636014:-	Y	Y	2.48682	9.22581e-08	9.18756e-05	0.0365966	ENSG00000023287	RB1CC1
2:28129381-28233142:+	Y	Y	-1.58992	9.4649e-08	9.30218e-05	-0.00877304	ENSG00000158019	BABAM2
8:52636035-52636069:-	Y	N	-14.1714	9.43101e-08	9.30218e-05	-0.122746	ENSG00000023287	RB1CC1
9:121157983-121158109:+	Y	N	-13.2005	9.38942e-08	9.30218e-05	-0.236387	ENSG00000119397	CNTRL
3:132450848-132453297:+	Y	Y	1.68889	1.02334e-07	0.000100137	0.0944238	ENSG00000138246	DNAJC13
7:6121491-6122200:+	N	N	1.63224	1.08171e-07	0.000105391	0.116966	ENSG00000106346	USP42
12:6858827-6859237:+	Y	Y	2.28174	1.1045e-07	0.000106688	0.0604645	ENSG00000111667	USP5
12:57613761-57613993:+	Y	Y	-1.78639	1.10248e-07	0.000106688	-0.105089	ENSG00000240771	ARHGEF25
1:94857501-94864742:+	Y	Y	-2.34226	1.13052e-07	0.000108734	-0.0264217	ENSG00000143036	SLC44A3
15:34145856-34146069:-	Y	Y	1.628	1.18807e-07	0.000113784	0.148006	ENSG00000134152	KATNBL1
3:77522903-77527402:+	Y	Y	-2.24415	1.21764e-07	0.000116121	-0.0365605	ENSG00000185008	ROBO2
8:92004422-92005115:-	Y	N	-4.94337	1.30398e-07	0.00012331	-0.162171	ENSG00000079102	RUNX1T1
21:45850096-45853970:+	Y	Y	-1.44256	1.29935e-07	0.00012331	-0.0429191	ENSG00000183570	PCBP3
18:63344342-63344409:-	Y	N	2.56244	1.31549e-07	0.000123877	0.218983	ENSG00000119537	KDSR
12:98544442-98544537:+	Y	N	1.27797	1.46109e-07	0.000137016	0.183818	ENSG00000120802	TMPO
12:6859238-6859389:+	N	N	2.27869	1.46904e-07	0.000137189	0.107126	ENSG00000111667	USP5
1:94867418-94888657:+	Y	Y	-2.09232	1.71968e-07	0.000159932	-0.0270142	ENSG00000143036	SLC44A3
8:52636015-52636034:-	Y	N	-14.6095	1.74779e-07	0.000161878	-0.163076	ENSG00000023287	RB1CC1
17:7259080-7259570:+	Y	N	1.17356	1.79569e-07	0.000165632	0.186658	ENSG00000170291	ELP5
4:7800654-7809438:-	Y	Y	-1.42419	1.81887e-07	0.000167086	-0.017057	ENSG00000196526	AFAP1
15:34146070-34146659:-	Y	N	1.37291	1.86284e-07	0.000170429	0.102989	ENSG00000134152	KATNBL1
14:52783423-52783485:-	Y	N	-14.4334	2.03605e-07	0.000185522	-0.0603312	ENSG00000100522	GNPNAT1
7:139053582-139053964:-	Y	Y	2.46893	2.07039e-07	0.000187891	0.166852	ENSG00000105939	ZC3HAV1
16:209774-220170:-	Y	Y	-1.03265	2.0879e-07	0.000188719	-0.0211891	ENSG00000007392	LUC7L
10:97481484-97484102:-	Y	Y	1.80942	2.12314e-07	0.000191136	0.0448691	ENSG00000155229	MMS19
8:61517013-61517527:-	Y	N	3.14621	2.17666e-07	0.000195174	0.202128	ENSG00000198363	ASPH
1:54255686-54257126:-	Y	Y	-2.03815	2.1886e-07	0.000195465	-0.0256485	ENSG00000157216	SSBP3
3:77588934-77595141:+	Y	Y	-1.95838	2.23257e-07	0.000197822	-0.0211681	ENSG00000185008	ROBO2
10:78035721-78035837:+	Y	N	1.61075	2.22974e-07	0.000197822	0.00793488	ENSG00000138326	RPS24
20:41080181-41081164:+	Y	Y	2.20671	2.26978e-07	0.000200331	0.197572	ENSG00000198900	TOP1
2:218629664-218630645:+	Y	Y	-2.63087	2.33997e-07	0.000205719	-0.225276	ENSG00000115556	PLCD4
2:208302581-208304170:+	Y	Y	1.76994	2.39647e-07	0.000209866	0.0755614	ENSG00000115020	PIKFYVE
20:62347029-62350987:-	Y	Y	-1.46874	2.41503e-07	0.000210672	-0.031653	ENSG00000130702	LAMA5
14:68893776-68900861:-	Y	Y	-1.38791	2.44042e-07	0.000212065	-0.0260849	ENSG00000072110	ACTN1
22:27873816-27894160:-	Y	Y	1.09205	2.47056e-07	0.000213858	0.0134632	ENSG00000180957	PITPNB
9:133642465-133643394:+	Y	Y	-0.928145	2.48288e-07	0.000214102	-0.00442936	ENSG00000123454	DBH
3:170122745-170128339:-	Y	Y	-2.16926	2.53699e-07	0.000217932	-0.0772713	ENSG00000173889	PHC3
16:2078239-2078773:+	Y	N	-1.08365	2.5971e-07	0.000222248	-0.0804832	ENSG00000103197	TSC2
2:217907252-217920194:-	Y	Y	-3.85996	2.62349e-07	0.000223655	-0.0295926	ENSG00000079308	TNS1
7:107963064-107964551:-	Y	Y	-1.30466	2.65123e-07	0.000224819	-0.0197852	ENSG00000091136	LAMB1
12:2861413-2863748:-	Y	Y	0.940859	2.65712e-07	0.000224819	0.0196062	ENSG00000111206	FOXM1
8:18006054-18006225:+	Y	N	1.47349	2.73376e-07	0.000230438	0.179335	ENSG00000078674	PCM1
1:184726390-184732782:-	Y	Y	1.19826	2.86087e-07	0.000239359	0.0181175	ENSG00000116406	EDEM3
14:45118126-45120886:-	Y	Y	1.26155	2.85846e-07	0.000239359	0.0160181	ENSG00000100442	FKBP3
21:43676337-43676732:+	Y	Y	1.90968	2.9171e-07	0.000243159	0.0590061	ENSG00000160208	RRP1B
10:106579475-106597350:-	Y	Y	1.14751	3.02289e-07	0.000251048	0.0177615	ENSG00000108018	SORCS1
1:239632287-239678185:+	Y	Y	-1.95006	3.07095e-07	0.000253882	-0.0114499	ENSG00000133019	CHRM3
3:47847537-47847776:+	Y	Y	1.7679	3.0835e-07	0.000253882	0.060308	ENSG00000132153	DHX30
14:100727413-100728395:+	Y	Y	-0.553945	3.09086e-07	0.000253882	-0.00336653	ENSG00000185559	DLK1
17:2388299-2389265:-	Y	Y	-1.75474	3.13391e-07	0.000256483	-0.0472516	ENSG00000070444	MNT
11:19884363-19892433:+	Y	Y	-1.72859	3.23309e-07	0.000263641	-0.0201769	ENSG00000166833	NAV2
3:77565121-77568312:+	Y	Y	-2.0399	3.26842e-07	0.000264605	-0.011314	ENSG00000185008	ROBO2
17:77380250-77400557:+	Y	Y	-1.16937	3.26038e-07	0.000264605	-0.00309384	ENSG00000184640	SEPTIN9
2:15620397-15621064:+	Y	N	1.59152	3.3013e-07	0.000266291	0.0183377	ENSG00000079785	DDX1
17:76532066-76537399:-	Y	Y	-1.35238	3.31291e-07	0.000266291	-0.0154118	ENSG00000161544	CYGB
14:92932269-92932369:+	Y	Y	-1.19346	3.35318e-07	0.000268568	-0.0259919	ENSG00000100604	CHGA
7:108002385-108002848:-	Y	N	-1.3675	3.48818e-07	0.00027839	-0.130093	ENSG00000091136	LAMB1
9:133648013-133651633:+	Y	Y	-0.855697	4.08969e-07	0.000325243	-0.00216328	ENSG00000123454	DBH
7:139055296-139060337:-	Y	Y	1.72587	4.23276e-07	0.000335435	0.0357908	ENSG00000105939	ZC3HAV1
2:53922585-53923048:-	Y	Y	2.03188	4.31958e-07	0.000341115	0.0554565	ENSG00000068878	PSME4
3:51961305-51961636:-	Y	N	-1.67549	4.3595e-07	0.000341869	-0.0892432	ENSG00000090097	PCBP4
11:113256002-113260090:+	Y	Y	-1.476	4.34654e-07	0.000341869	-0.00381587	ENSG00000149294	NCAM1
11:115179112-115190608:-	Y	Y	-1.02012	4.45899e-07	0.000348456	-0.00713791	ENSG00000182985	CADM1
17:73031715-73072268:-	Y	Y	-1.9448	4.53084e-07	0.000352846	-0.0180179	ENSG00000133195	SLC39A11
3:182846036-182848475:+	Y	Y	2.01934	4.60015e-07	0.000355781	0.0294381	ENSG00000058063	ATP11B
21:46208302-46209553:-	Y	Y	1.45828	4.59234e-07	0.000355781	0.024404	ENSG00000160285	LSS
8:18006263-18006397:+	Y	N	-2.62861	4.70231e-07	0.000360337	-0.0710382	ENSG00000078674	PCM1
12:27725668-27735446:+	Y	Y	1.05251	4.70708e-07	0.000360337	0.00744391	ENSG00000061794	MRPS35
17:41988897-41989403:-	Y	Y	1.75191	4.68588e-07	0.000360337	0.0170241	ENSG00000168259	DNAJC7
14:77287272-77287579:-	Y	Y	2.30756	4.78268e-07	0.000364883	0.0865492	ENSG00000009830	POMT2
14:92931703-92932137:+	Y	Y	-0.694505	4.81181e-07	0.000365865	-0.0145303	ENSG00000100604	CHGA
X:129487138-129488936:-	Y	Y	2.01185	4.84221e-07	0.000366937	0.0143995	ENSG00000102038	SMARCA1
3:64633880-64641847:-	Y	Y	1.29861	4.87261e-07	0.000368001	0.0218295	ENSG00000163638	ADAMTS9
10:5709530-5709625:+	Y	N	1.72712	4.92769e-07	0.000370917	0.28374	ENSG00000108021	TASOR2
3:77622433-77629121:+	Y	Y	-1.9894	5.16642e-07	0.00038759	-0.0425111	ENSG00000185008	ROBO2
7:87181342-87182016:+	Y	Y	1.23121	5.20973e-07	0.000389541	0.0648677	ENSG00000135164	DMTF1
2:216633966-216659617:+	Y	Y	-1.28989	5.28151e-07	0.0003936	-0.00182632	ENSG00000115457	IGFBP2
17:2985198-2991296:+	Y	Y	-1.64434	5.3619e-07	0.000398272	-0.0108523	ENSG00000132359	RAP1GAP2
7:82067209-82067256:-	N	N	2.07322	5.59197e-07	0.000413995	0.111783	ENSG00000153956	CACNA2D1
6:56542506-56542808:-	Y	N	-1.52907	5.70566e-07	0.000421028	-0.258474	ENSG00000151914	DST
5:40972595-40976662:+	Y	Y	-3.00236	6.13359e-07	0.000449656	-0.00455682	ENSG00000112936	C7
17:51031723-51040427:-	Y	Y	-1.11669	6.11978e-07	0.000449656	-0.0107947	ENSG00000008294	SPAG9
X:45106650-45106713:+	Y	N	4.07265	6.17743e-07	0.0004514	0.58389	ENSG00000147050	KDM6A
2:219485478-219488193:+	Y	Y	-3.31314	6.39803e-07	0.000466007	-0.0687299	ENSG00000072195	SPEG
3:77607955-77617512:+	Y	Y	-1.88006	6.44365e-07	0.000467815	-0.0116152	ENSG00000185008	ROBO2
2:219490957-219491793:+	Y	Y	-4.88135	6.49243e-07	0.000469841	-0.188579	ENSG00000072195	SPEG
3:11626514-11627315:-	Y	Y	-2.01999	6.51362e-07	0.000469864	-0.0178367	ENSG00000144560	VGLL4
17:57616632-57625571:+	Y	Y	-1.46841	6.6478e-07	0.000478011	-0.050937	ENSG00000153944	MSI2
17:66965132-66984593:+	Y	Y	-0.934357	6.75934e-07	0.000484483	-0.0079394	ENSG00000075461	CACNG4
11:44909900-44917581:+	Y	Y	-3.6856	6.87645e-07	0.000489758	-0.00939252	ENSG00000157570	TSPAN18
17:2391496-2391815:-	Y	N	-1.77596	6.85676e-07	0.000489758	-0.127041	ENSG00000070444	MNT
11:20093200-20095671:+	Y	Y	-1.40708	7.41724e-07	0.000524952	-0.0140717	ENSG00000166833	NAV2
X:119653041-119663481:-	Y	Y	-0.893355	7.40309e-07	0.000524952	-0.00258609	ENSG00000125354	SEPTIN6
8:30756888-30760887:+	Y	Y	-3.09535	7.49769e-07	0.000528982	-0.0105934	ENSG00000104691	UBXN8
X:129508097-129511803:-	Y	Y	1.32027	7.81003e-07	0.000549296	0.0100702	ENSG00000102038	SMARCA1
8:38030719-38047338:+	Y	Y	-0.965668	7.93223e-07	0.000556153	-0.00356193	ENSG00000187840	EIF4EBP1
2:27313388-27315715:-	Y	Y	-1.12228	8.07828e-07	0.000564634	-0.0366484	ENSG00000115204	MPV17
3:127639524-127660377:+	Y	Y	-1.12097	8.19955e-07	0.000571336	-0.00394868	ENSG00000114631	PODXL2
2:74878922-74880264:+	Y	Y	-1.8643	8.43507e-07	0.000585933	-0.016388	ENSG00000159399	HK2
13:113001984-113014762:+	Y	Y	-1.55508	8.5735e-07	0.000593716	-0.0299935	ENSG00000126217	MCF2L
17:77376399-77380122:+	Y	Y	-1.39542	8.64367e-07	0.000596739	-0.005581	ENSG00000184640	SEPTIN9
4:185594654-185599947:-	Y	Y	-2.19734	8.8657e-07	0.000610196	-0.039096	ENSG00000154556	SORBS2
19:1372099-1373071:+	Y	N	-1.64153	9.2165e-07	0.000632407	-0.0930373	ENSG00000160953	PWWP3A
2:27037179-27037261:+	Y	Y	2.7175	9.3065e-07	0.000636641	0.219729	ENSG00000119777	TMEM214
[truncated: 1,399 more rows]
